# Supplementary material
Source: Research Square preprint supplement (doi:10.21203/rs.3.rs-8897065/v1)
Supplement: Supplementary file 1 [file 528dd5816b010f593526d475.xlsx]

## Sheet: Legend
Supplementary Table List
Supplementary Table 1. Characteristics of the established PDX or organoids for breast cancer
Supplementary Table 2. H3K9me3-guided, nucleolomics-targeted CRISPR screen data in YUMMER1.7
Supplementary Table 3. H3K9me3-guided, nucleolomics-targeted CRISPR screen data in B16F10
Supplementary Table 4. sgRNA and shRNA sequences
Supplementary Table 5. primer sequence
Supplementary Table 6. reagent, antibodies
Supplementary Table 7. OTUD4 depletion-mediated ERV alteration.
Supplementary Table 8. IP-Mass spectrometry data
Supplementary Table 9. Drug screen data

## Sheet: Table1 Characteristics
No.	Gender	Age	Purpose Cancer	stage	Treatment history	IHC
#1	Female	25	Breast cancer	T2N1M0	No	ER (2+, 60%), PR (2+, 1%), HER2 (1+), Ki-67 (65%)	Hubei Cancer Hospital (52)
#2	Female	40	Breast cancer	T2N1M0	No	ER (-), PR (-), HER2 (1+), Ki-67 (70%)	Renmin Hospital of Wuhan University (51)

## Sheet: Table2
id	num	neg|score	neg|p-value	neg|fdr	neg|rank	neg|goodsgrna	neg|lfc	pos|score	pos|p-value	pos|fdr	pos|rank	pos|goodsgrna	pos|lfc
Npm1	6	0.16659	0.33475	0.971184	210	1	3.4082	9.8916e-05	0.00050043	0.188249	1	4	3.4082
Myh9	5	0.92643	0.92696	0.998352	670	0	4.2666	0.00014501	0.0005797	0.188249	2	4	4.2666
Wdr74	5	0.9962	0.99635	0.999381	721	0	4.1813	0.00017743	0.00077789	0.188249	3	5	4.1813
Blm	6	0.53401	0.68351	0.994626	461	1	3.5416	0.00024602	0.0013725	0.199281	4	4	3.5416
Grwd1	3	0.99663	0.9966	0.999381	722	0	5.2905	0.00041941	0.0012932	0.199281	5	3	5.2905
Rrp12	6	0.99939	0.99938	0.999381	726	0	1.3987	0.00060815	0.0033841	0.350976	6	6	1.3987
Dnajc8	4	0.10628	0.22567	0.898989	170	1	1.6631	0.00063296	0.0025616	0.309952	7	2	1.6631
Vrk1	5	0.99891	0.99899	0.999381	725	0	1.5338	0.0010914	0.0046426	0.421313	8	5	1.5338
Baz1b	6	0.9974	0.99725	0.999381	724	0	1.3401	0.0012334	0.0062677	0.505596	9	5	1.3401
Nsmce1	4	0.93606	0.9353	0.998352	678	0	2.4912	0.0020572	0.0077739	0.564388	10	3	2.4912
Mrto4	6	0.97921	0.97918	0.998352	707	0	1.2818	0.0023981	0.011609	0.600944	11	5	1.2818
Hnrnpl	5	0.28798	0.4547	0.994626	311	2	0.46134	0.0027723	0.011837	0.600944	12	3	0.46134
Rbm34	6	0.77943	0.82242	0.994626	582	1	-0.13096	0.0028456	0.013145	0.600944	13	2	-0.13096
Ruvbl1	4	0.65532	0.68249	0.994626	521	1	1.3387	0.0031618	0.011619	0.600944	14	2	1.3387
Atp5f1b	5	0.87699	0.87752	0.994626	639	0	2.4665	0.0039949	0.016811	0.717943	15	3	2.4665
Rpl31	3	0.38906	0.4582	0.994626	371	1	3.4413	0.0049787	0.013244	0.600944	16	2	3.4413
Cbx5	6	0.47035	0.63445	0.994626	422	1	1.5466	0.0053557	0.022975	0.831909	17	4	1.5466
Metap1	6	0.31182	0.51902	0.994626	325	3	-0.17575	0.0066293	0.027801	0.831909	18	2	-0.17575
Cycs	6	0.82191	0.84506	0.994626	596	1	1.3097	0.0067674	0.028356	0.831909	19	5	1.3097
Rpl39	3	0.087086	0.16136	0.889058	144	1	1.2093	0.0080505	0.021508	0.831909	20	2	1.2093
Eif2s2	6	0.056549	0.15607	0.889058	108	3	-0.56992	0.0085166	0.034292	0.831909	21	2	-0.56992
Snrpe	4	0.94315	0.94226	0.998352	683	0	2.2609	0.0089062	0.030387	0.831909	22	3	2.2609
Rpl34	3	0.84125	0.8426	0.994626	610	0	2.8991	0.0099384	0.026295	0.831909	23	2	2.8991
Ctnnbl1	6	0.63992	0.76774	0.994626	514	1	1.1643	0.010193	0.040237	0.831909	24	3	1.1643
Syncrip	6	0.58242	0.72098	0.994626	484	2	0.30313	0.010401	0.040832	0.831909	25	3	0.30313
Nepro	6	0.36307	0.55494	0.994626	354	2	0.69232	0.011889	0.045846	0.831909	26	3	0.69232
Ngdn	6	0.10629	0.25228	0.924227	171	3	-0.38386	0.012282	0.047124	0.831909	27	1	-0.38386
Rbbp7	6	0.40208	0.5833	0.994626	381	2	1.1115	0.012304	0.047223	0.831909	28	4	1.1115
Arpc1a	6	0.99685	0.99665	0.999381	723	0	0.54492	0.012572	0.048304	0.831909	29	5	0.54492
NCsgRNA_12	1	0.98718	0.98724	0.998352	717	0	5.1776	0.012821	0.012748	0.600944	30	1	5.1776
Nmd3	4	0.98522	0.98565	0.998352	711	0	1.7585	0.012847	0.042596	0.831909	31	4	1.7585
Wbp11	5	0.36083	0.52084	0.994626	351	1	0.8524	0.013031	0.043785	0.831909	32	4	0.8524
Otud4	4	0.98666	0.98716	0.998352	715	0	0.61365	0.013336	0.043973	0.831909	33	4	0.61365
Sf3a3	3	0.98627	0.98623	0.998352	714	0	2.0366	0.013733	0.0356	0.831909	34	3	2.0366
Ddx27	4	0.98626	0.98674	0.998352	713	0	0.81792	0.013737	0.045222	0.831909	35	4	0.81792
Csnk2a1	6	0.74445	0.80699	0.994626	565	1	1.0738	0.013804	0.052366	0.831909	36	3	1.0738
Nol11	3	0.1215	0.20832	0.897978	186	1	2.6678	0.013813	0.035837	0.831909	37	2	2.6678
Aurkb	6	0.72561	0.79942	0.994626	554	1	0.74767	0.01406	0.053268	0.831909	38	3	0.74767
Ssb	6	0.0046534	0.019745	0.530909	23	3	-0.30136	0.014161	0.053575	0.831909	39	2	-0.30136
Rpl7a	2	0.9858	0.98519	0.998352	712	0	3.2302	0.014205	0.0268	0.831909	40	2	3.2302
Hnrnpf	6	0.82236	0.84535	0.994626	597	1	1.1859	0.014446	0.054517	0.831909	41	4	1.1859
Mrpl12	5	0.19077	0.35974	0.971184	233	2	1.4621	0.014455	0.047848	0.831909	42	3	1.4621
Rpf2	5	0.58966	0.699	0.994626	488	1	0.92337	0.014946	0.049384	0.831909	43	4	0.92337
Gapdh	4	0.0319	0.08257	0.811151	71	2	0.9246	0.016338	0.052267	0.831909	44	2	0.9246
Mre11a	4	0.20545	0.33405	0.971184	250	1	1.912	0.017649	0.055002	0.831909	45	3	1.912
Smc3	3	0.4866	0.52198	0.994626	429	1	0.65169	0.018873	0.048413	0.831909	46	2	0.65169
Rpl38	4	0.239	0.36994	0.97284	276	1	0.76487	0.02073	0.061324	0.892127	47	3	0.76487
Zcchc9	6	0.3203	0.52555	0.994626	329	2	0.19233	0.021645	0.077407	0.892127	48	3	0.19233
Rbx1	4	0.95189	0.95144	0.998352	687	0	1.2358	0.02322	0.066626	0.892127	49	3	1.2358
Pcsk9	6	0.61586	0.74866	0.994626	502	2	-0.073902	0.023508	0.083353	0.892127	50	2	-0.073902
Noc3l	4	0.67373	0.69508	0.994626	530	1	1.2919	0.023894	0.068221	0.892127	51	2	1.2919
Zfr	6	0.88197	0.88565	0.994626	643	1	0.84601	0.023968	0.084404	0.892127	52	4	0.84601
Fam98b	5	0.042775	0.12221	0.861389	88	1	1.4498	0.024599	0.075426	0.892127	53	3	1.4498
Septin11	6	0.15183	0.31434	0.971184	203	3	-0.16744	0.025369	0.087971	0.892127	54	2	-0.16744
Ccnb1	5	0.40388	0.5591	0.994626	384	1	1.3785	0.026251	0.079568	0.892127	55	3	1.3785
Rpl36	4	0.19292	0.32123	0.971184	237	2	0.73935	0.026354	0.073473	0.892127	56	2	0.73935
Nop14	6	0.085132	0.21522	0.897978	140	1	0.92586	0.027226	0.092599	0.892127	57	4	0.92586
Gtf2h2	3	0.88628	0.8873	0.994626	647	0	2.174	0.027422	0.068241	0.892127	58	2	2.174
Phf6	6	0.91183	0.9127	0.998352	660	0	0.75821	0.027455	0.093104	0.892127	59	4	0.75821
Rpl21	3	0.45682	0.50228	0.994626	417	1	0.90479	0.027754	0.069103	0.892127	60	2	0.90479
H1f4	5	0.3165	0.48031	0.994626	327	1	0.65041	0.027755	0.084007	0.892127	61	4	0.65041
Rbm27	6	0.96595	0.96583	0.998352	699	0	1.07	0.027863	0.094065	0.892127	62	4	1.07
Nat10	4	0.68824	0.70523	0.994626	534	1	1.0076	0.028187	0.077497	0.892127	63	3	1.0076
Rrp1b	6	0.73454	0.80299	0.994626	560	1	0.098278	0.028474	0.095482	0.892127	64	3	0.098278
Rps16	2	0.97094	0.97028	0.998352	702	0	1.477	0.029058	0.052862	0.831909	65	2	1.477
Arpc2	6	0.069168	0.18209	0.889058	119	3	-0.30757	0.029081	0.096979	0.892127	66	2	-0.30757
Morf4l1	5	0.85037	0.85085	0.994626	617	1	0.68555	0.029113	0.087436	0.892127	67	4	0.68555
Dhx15	5	0.9385	0.93932	0.998352	679	0	0.58322	0.031257	0.092777	0.892127	68	3	0.58322
Rpl8	1	0.96803	0.96857	0.998352	700	0	3.9256	0.031972	0.032042	0.831909	69	1	3.9256
Csnk2a2	6	0.48381	0.6447	0.994626	427	2	0.037516	0.032781	0.10594	0.892127	70	2	0.037516
Gtf2f1	6	0.34018	0.53916	0.994626	340	1	0.42518	0.033766	0.10814	0.892127	71	3	0.42518
Rps23	4	0.38762	0.52948	0.994626	370	1	0.62955	0.034369	0.089923	0.892127	72	2	0.62955
Utp20	4	0.76626	0.76805	0.994626	572	1	1.3287	0.03619	0.09359	0.892127	73	2	1.3287
Smc2	2	0.56082	0.55893	0.994626	475	0	2.083	0.036694	0.066061	0.892127	74	1	2.083
Nop53	5	0.99446	0.99448	0.999381	720	0	1.0232	0.036743	0.10694	0.892127	75	4	1.0232
Cdca8	2	0.57	0.56852	0.994626	479	0	2.1448	0.037626	0.067914	0.892127	76	1	2.1448
Exosc10	6	0.086357	0.2176	0.898606	141	3	0.17845	0.038803	0.11947	0.899898	77	3	0.17845
Septin2	6	0.87774	0.88245	0.994626	640	1	0.76345	0.039249	0.12035	0.899898	78	4	0.76345
Rnf40	6	0.84208	0.85717	0.994626	612	1	0.70564	0.039986	0.12195	0.899898	79	3	0.70564
Got2	6	0.15123	0.31347	0.971184	202	3	-0.41958	0.040147	0.12235	0.899898	80	2	-0.41958
Pwp2	3	0.24027	0.36213	0.971184	279	1	0.95563	0.040744	0.098515	0.892127	81	2	0.95563
Usp39	4	0.96059	0.96046	0.998352	697	0	1.411	0.042454	0.10617	0.892127	82	3	1.411
Nol9	3	0.64609	0.64818	0.994626	518	1	-0.069703	0.042591	0.10322	0.892127	83	1	-0.069703
Rps13	3	0.05316	0.1132	0.857575	105	1	-0.093382	0.044434	0.10734	0.892127	84	1	-0.093382
Nvl	6	0.55762	0.70183	0.994626	474	2	0.20223	0.04458	0.13231	0.901942	85	3	0.20223
Rps27a	4	0.050346	0.1193	0.857575	102	2	0.0090607	0.045891	0.11266	0.899898	86	2	0.0090607
Fam133b	5	0.64604	0.72315	0.994626	517	1	0.50689	0.047352	0.13389	0.901942	87	3	0.50689
Llph	6	0.4499	0.61846	0.994626	407	2	-0.24067	0.047466	0.13884	0.901942	88	2	-0.24067
Snrpd3	2	0.95236	0.95176	0.998352	689	0	1.3501	0.04764	0.085117	0.892127	89	2	1.3501
Srp9	4	0.084244	0.18499	0.889058	138	2	-0.26856	0.049086	0.11878	0.899898	90	2	-0.26856
Zmat2	6	0.3995	0.58138	0.994626	379	2	-0.22357	0.049289	0.14307	0.901942	91	2	-0.22357
Septin7	6	0.92322	0.92348	0.998352	669	0	0.61646	0.049639	0.14389	0.901942	92	3	0.61646
Bccip	3	0.82839	0.82934	0.994626	604	0	1.4651	0.049762	0.11456	0.899898	93	2	1.4651
Rrp7a	6	0.02847	0.09136	0.811151	62	3	-0.64387	0.050441	0.14566	0.901942	94	2	-0.64387
Pelp1	5	0.34969	0.51028	0.994626	345	1	1.1592	0.051044	0.14316	0.901942	95	3	1.1592
Rpl37	6	0.98676	0.98689	0.998352	716	0	0.68725	0.051084	0.14718	0.901942	96	4	0.68725
Isg20l2	4	0.52792	0.607	0.994626	457	1	1.0012	0.051258	0.12271	0.899898	97	2	1.0012
Tubb5	2	0.43453	0.43973	0.994626	400	1	1.6608	0.052166	0.092965	0.892127	98	1	1.6608
Rrp8	6	0.45457	0.62215	0.994626	413	2	-0.15328	0.052925	0.15112	0.901942	99	2	-0.15328
Gcn1	6	0.18409	0.3573	0.971184	225	3	-0.50694	0.053244	0.15187	0.901942	100	2	-0.50694
Rtf2	5	0.67342	0.73548	0.994626	529	1	0.63779	0.053644	0.14966	0.901942	101	4	0.63779
Rbmy	6	0.93433	0.93486	0.998352	676	0	0.53188	0.053773	0.15281	0.901942	102	3	0.53188
Eef2	3	0.90577	0.90582	0.998352	658	0	1.4835	0.054979	0.12221	0.899898	103	2	1.4835
Rpl18	3	0.79505	0.79625	0.994626	588	0	0.063325	0.057275	0.12532	0.900812	104	1	0.063325
Csnk2b	2	0.94174	0.94087	0.998352	682	0	0.92632	0.058261	0.10312	0.892127	105	2	0.92632
Wdr75	6	0.95621	0.95587	0.998352	693	0	0.71424	0.058385	0.16179	0.922973	106	3	0.71424
Utp23	2	0.52399	0.52122	0.994626	453	1	1.3968	0.060162	0.10659	0.892127	107	1	1.3968
Pds5a	5	0.38037	0.53858	0.994626	365	2	0.98407	0.061305	0.16318	0.922973	108	3	0.98407
Ddx56	4	0.049695	0.11792	0.857575	99	2	0.60679	0.061405	0.14259	0.901942	109	2	0.60679
Utp4	4	0.95253	0.95237	0.998352	691	0	1.0597	0.061734	0.14314	0.901942	110	2	1.0597
Khdrbs1	6	0.2747	0.47369	0.994626	304	2	0.66422	0.062438	0.16995	0.922973	111	4	0.66422
Ddx55	5	0.070933	0.17096	0.889058	121	2	0.91892	0.064101	0.16751	0.922973	112	3	0.91892
Erh	5	0.019327	0.060294	0.806082	48	3	-1.1175	0.065328	0.1695	0.922973	113	2	-1.1175
Eif2s3x	3	0.3725	0.44828	0.994626	359	1	1.2331	0.065469	0.13684	0.901942	114	2	1.2331
Rpl11	3	0.67159	0.67212	0.994626	528	1	1.4402	0.065589	0.13702	0.901942	115	2	1.4402
Hsp90ab1	6	0.00040356	0.0022048	0.333183	2	2	0.63862	0.066957	0.17923	0.922973	116	3	0.63862
Ppp1cc	6	0.36269	0.55466	0.994626	353	2	0.12974	0.070932	0.18765	0.922973	117	3	0.12974
Rpl27a	1	0.92862	0.92896	0.998352	672	0	2.5817	0.071383	0.071918	0.892127	118	1	2.5817
Sart3	3	0.67159	0.67212	0.994626	527	1	0.84575	0.071456	0.14523	0.901942	119	2	0.84575
Sbds	4	0.86734	0.86761	0.994626	627	0	0.96909	0.071588	0.162	0.922973	120	2	0.96909
Hnrnpm	6	0.2946	0.49723	0.994626	319	1	0.57622	0.072447	0.19113	0.922973	121	4	0.57622
Nom1	6	0.88638	0.88916	0.994626	648	1	0.65135	0.072832	0.19178	0.922973	122	4	0.65135
Mroh8	6	0.95649	0.95611	0.998352	694	0	0.3993	0.073928	0.19393	0.922973	123	3	0.3993
Kpna2	5	0.7027	0.75011	0.994626	539	1	0.35178	0.074024	0.18381	0.922973	124	3	0.35178
Rplp2	3	0.87068	0.87167	0.994626	632	0	1.2143	0.075664	0.1508	0.901942	125	2	1.2143
Nol8	6	0.033766	0.10433	0.857575	75	3	-0.30023	0.076081	0.19822	0.922973	126	2	-0.30023
Rpp25	6	0.89738	0.89884	0.997794	653	1	0.55732	0.076348	0.19877	0.922973	127	4	0.55732
Wdr43	5	0.84367	0.84505	0.994626	613	1	0.9338	0.077122	0.18876	0.922973	128	3	0.9338
Rpl18a	1	0.9226	0.92301	0.998352	668	0	2.4019	0.077398	0.078012	0.892127	129	1	2.4019
Tra2b	5	0.39493	0.55125	0.994626	374	1	0.81991	0.079422	0.19232	0.922973	130	3	0.81991
Exosc8	4	0.27048	0.40346	0.979959	300	1	0.74722	0.080913	0.1795	0.922973	131	2	0.74722
Surf6	6	0.8784	0.88286	0.994626	641	1	0.57658	0.081	0.20836	0.922973	132	3	0.57658
Nol12	6	0.43236	0.60506	0.994626	397	2	-0.22844	0.081599	0.2095	0.922973	133	2	-0.22844
Dkc1	3	0.67159	0.67212	0.994626	525	1	0.13808	0.081713	0.15957	0.922973	134	1	0.13808
Pop7	5	0.43357	0.58573	0.994626	399	2	0.37261	0.0822	0.19697	0.922973	135	2	0.37261
Rpl35a	2	0.095123	0.16371	0.889058	158	1	-0.24672	0.082734	0.14405	0.901942	136	1	-0.24672
Rps9	4	0.55058	0.61895	0.994626	470	1	-0.32213	0.083363	0.18407	0.922973	137	1	-0.32213
Prpf8	4	0.43029	0.55856	0.994626	396	1	0.3609	0.083363	0.18407	0.922973	138	2	0.3609
Plrg1	5	0.041254	0.11824	0.857575	86	4	-0.69455	0.084074	0.20005	0.922973	139	1	-0.69455
Nle1	5	0.374	0.53273	0.994626	360	1	0.90631	0.086542	0.20393	0.922973	140	3	0.90631
Ddx47	2	0.2408	0.28168	0.964623	280	1	0.93022	0.086974	0.15098	0.901942	141	1	0.93022
Mphosph10	5	0.023517	0.071828	0.811151	57	3	-0.77421	0.089254	0.20854	0.922973	142	2	-0.77421
Smndc1	5	0.01885	0.059055	0.806082	46	1	0.49895	0.09021	0.21017	0.922973	143	3	0.49895
Rbis	6	0.082675	0.21014	0.897978	134	2	0.28754	0.09041	0.22697	0.922973	144	2	0.28754
Actr2	5	0.45342	0.60366	0.994626	412	1	0.63623	0.093102	0.21522	0.922973	145	3	0.63623
Rps25	4	0.95664	0.95645	0.998352	695	0	1.1193	0.093378	0.20245	0.922973	146	3	1.1193
Rpf1	4	0.075031	0.16708	0.889058	128	1	0.81561	0.09354	0.20281	0.922973	147	3	0.81561
Srp19	5	0.43862	0.59038	0.994626	401	1	-0.14397	0.09456	0.21754	0.922973	148	2	-0.14397
Ncaph2	4	0.87443	0.8748	0.994626	637	0	0.57403	0.094935	0.20532	0.922973	149	2	0.57403
Pak1ip1	1	0.90456	0.90538	0.998352	657	0	1.885	0.095442	0.095998	0.892127	150	1	1.885
Rae1	4	0.9803	0.98069	0.998352	709	0	0.78311	0.095594	0.20645	0.922973	151	3	0.78311
Srsf7	5	0.23364	0.40629	0.979959	273	2	1.0631	0.096227	0.22016	0.922973	152	3	1.0631
Rrs1	6	0.86105	0.8701	0.994626	622	1	0.70928	0.098118	0.24265	0.922973	153	4	0.70928
Dnmt1	6	0.78424	0.82485	0.994626	586	1	0.5329	0.099047	0.24424	0.922973	154	4	0.5329
susd6	6	0.87135	0.87775	0.994626	633	1	0.12569	0.10002	0.24607	0.922973	155	3	0.12569
Rpl23a	1	0.89981	0.90073	0.998352	655	0	1.857	0.10019	0.10089	0.892127	156	1	1.857
Hnrnpa0	6	0.76618	0.8163	0.994626	571	1	0.53354	0.10029	0.24659	0.922973	157	4	0.53354
Heatr1	3	0.10881	0.19131	0.889058	177	1	-0.54274	0.10131	0.18623	0.922973	158	1	-0.54274
Supt16	3	0.29127	0.40147	0.979959	315	1	-0.28549	0.10131	0.18623	0.922973	159	1	-0.28549
Abcf1	4	0.95795	0.95767	0.998352	696	0	0.87187	0.10245	0.21909	0.922973	160	3	0.87187
Dync1h1	5	0.62051	0.71157	0.994626	505	1	0.55934	0.10343	0.23084	0.922973	161	3	0.55934
Bysl	5	0.84367	0.84505	0.994626	614	1	0.75924	0.10348	0.23088	0.922973	162	3	0.75924
Poldip3	6	0.91674	0.9172	0.998352	665	0	0.12065	0.10359	0.25312	0.922973	163	2	0.12065
Parn	6	0.7358	0.80346	0.994626	562	1	0.54984	0.10409	0.25385	0.922973	164	4	0.54984
Frg1	5	0.92895	0.92954	0.998352	673	0	0.75635	0.1041	0.23184	0.922973	165	3	0.75635
H1f10	6	0.22055	0.40431	0.979959	261	2	0.3994	0.1057	0.25676	0.922973	166	4	0.3994
Rfc5	3	0.1345	0.22545	0.898989	193	2	-0.75216	0.10573	0.19191	0.922973	167	1	-0.75216
Tcerg1	6	0.75463	0.81133	0.994626	567	1	0.43514	0.10588	0.2571	0.922973	168	3	0.43514
Ddx1	4	0.97637	0.97682	0.998352	706	0	0.73531	0.10625	0.22591	0.922973	169	3	0.73531
Nhp2	4	0.77342	0.77481	0.994626	576	1	0.2575	0.10744	0.22801	0.922973	170	2	0.2575
Ddx31	6	0.38708	0.57199	0.994626	369	1	0.34979	0.10785	0.26107	0.922973	171	3	0.34979
Pop4	5	0.34632	0.50746	0.994626	344	1	0.64706	0.10888	0.23922	0.922973	172	3	0.64706
NCsgRNA_23	1	0.88525	0.88598	0.994626	646	0	1.3373	0.11475	0.11534	0.899898	173	1	1.3373
Tma16	4	0.77342	0.77481	0.994626	577	1	0.17611	0.11497	0.241	0.922973	174	1	0.17611
Cdkn2aip	6	0.77509	0.82035	0.994626	579	1	0.51939	0.11576	0.27682	0.922973	175	3	0.51939
Brix1	5	0.18722	0.35427	0.971184	230	3	-0.27012	0.11579	0.24916	0.922973	176	2	-0.27012
Nop9	5	0.22111	0.39532	0.979959	263	2	0.68089	0.11581	0.24919	0.922973	177	3	0.68089
Tubb4b	6	0.85621	0.86647	0.994626	620	1	0.47951	0.11703	0.27898	0.922973	178	4	0.47951
Rsl1d1	5	0.11371	0.24079	0.924227	179	2	0.7769	0.11759	0.25206	0.922973	179	3	0.7769
NCsgRNA_43	1	0.8824	0.88318	0.994626	644	0	1.3996	0.1176	0.11821	0.899898	180	1	1.3996
Nsmce3	4	0.20438	0.33313	0.971184	247	2	0.31704	0.11899	0.24779	0.922973	181	2	0.31704
Trmt112	6	0.010401	0.040574	0.755303	35	4	-0.82605	0.11966	0.28345	0.922973	182	2	-0.82605
Rfc4	4	0.0319	0.08257	0.811151	70	2	-0.12464	0.11983	0.24922	0.922973	183	2	-0.12464
Upf3b	5	0.97096	0.97107	0.998352	703	0	0.671	0.1201	0.2556	0.922973	184	3	0.671
Ahctf1	6	0.85316	0.86442	0.994626	619	1	0.43371	0.12093	0.28581	0.922973	185	3	0.43371
Ppih	6	0.70905	0.79323	0.994626	542	1	0.62448	0.12302	0.28837	0.922973	186	3	0.62448
Nifk	5	0.72311	0.76096	0.994626	553	1	0.55221	0.12336	0.2608	0.922973	187	3	0.55221
Ftsj3	1	0.87607	0.87664	0.994626	638	0	1.7723	0.12393	0.12471	0.900812	188	1	1.7723
Gnl3	5	0.35968	0.51958	0.994626	350	2	0.69269	0.1252	0.26347	0.922973	189	3	0.69269
2810004N23Rik	5	0.42563	0.57901	0.994626	394	2	-0.25909	0.12533	0.26371	0.922973	190	2	-0.25909
Rad50	5	0.18654	0.35326	0.971184	227	2	0.44524	0.1282	0.26813	0.922973	191	3	0.44524
Etf1	2	0.50235	0.50093	0.994626	438	1	1.0158	0.12853	0.21121	0.922973	192	1	1.0158
Exosc7	3	0.55626	0.57322	0.994626	473	1	-0.28023	0.13018	0.22371	0.922973	193	1	-0.28023
Kpna4	6	0.14556	0.30601	0.971184	199	3	-0.30023	0.13056	0.29783	0.922973	194	2	-0.30023
Rps7	1	0.8691	0.86986	0.994626	630	0	1.8667	0.1309	0.1314	0.901942	195	1	1.8667
Srpk1	6	0.94001	0.94042	0.998352	681	0	0.29949	0.13093	0.29832	0.922973	196	3	0.29949
Rrn3	1	0.8672	0.86815	0.994626	626	0	1.6758	0.1328	0.13346	0.901942	197	1	1.6758
Rpp40	5	0.66559	0.73195	0.994626	524	1	0.70875	0.13381	0.27662	0.922973	198	3	0.70875
Med10	6	0.24122	0.43084	0.994626	281	2	0.081976	0.1351	0.30373	0.924328	199	3	0.081976
Rrp9	3	0.84097	0.84237	0.994626	609	0	0.40801	0.13579	0.23075	0.922973	200	2	0.40801
Ddx21	6	0.60799	0.74187	0.994626	497	1	0.44774	0.13588	0.30478	0.924328	201	3	0.44774
Pdcd11	4	0.22635	0.35632	0.971184	269	2	-0.55551	0.13615	0.27299	0.922973	202	1	-0.55551
Nop58	4	0.0089756	0.030585	0.653089	33	2	-1.5884	0.1377	0.27436	0.922973	203	2	-1.5884
Tbl3	5	0.44149	0.59282	0.994626	402	2	0.50721	0.1388	0.28451	0.922973	204	3	0.50721
Utp3	6	0.26572	0.46169	0.994626	296	3	-0.15137	0.1393	0.30912	0.924328	205	2	-0.15137
Srsf3	5	0.97952	0.97921	0.998352	708	0	0.42795	0.14159	0.28877	0.922973	206	2	0.42795
Rack1	4	0.11603	0.23716	0.915831	181	2	0.24664	0.1449	0.28207	0.922973	207	2	0.24664
Plec	5	0.82411	0.82897	0.994626	599	1	0.11392	0.14624	0.29557	0.922973	208	2	0.11392
Eif2s1	4	0.17079	0.29686	0.971184	214	1	0.62338	0.14649	0.28386	0.922973	209	2	0.62338
Tcof1	5	0.071464	0.17182	0.889058	122	1	0.20358	0.14996	0.3013	0.922973	210	2	0.20358
Rps27	5	0.077165	0.1814	0.889058	131	2	0.35962	0.15362	0.30692	0.924328	211	2	0.35962
Ddx18	5	0.076673	0.18066	0.889058	130	1	0.27764	0.15551	0.30956	0.924328	212	2	0.27764
H2ax	6	0.25733	0.45138	0.994626	290	3	-0.23644	0.15675	0.33217	0.938345	213	2	-0.23644
Gtf2f2	3	0.12867	0.21784	0.898606	188	2	-0.64333	0.15758	0.25847	0.922973	214	1	-0.64333
Rpl6	3	0.0023723	0.0064461	0.351233	15	1	0.84423	0.15794	0.2589	0.922973	215	2	0.84423
Rpl24	3	0.069547	0.13684	0.874876	120	1	0.31896	0.15969	0.26115	0.922973	216	1	0.31896
Wdr55	4	0.086916	0.18983	0.889058	142	1	0.59786	0.16085	0.29814	0.922973	217	2	0.59786
Ppif	6	0.85957	0.86906	0.994626	621	1	0.318	0.16236	0.33931	0.939182	218	3	0.318
Prpf4	4	0.24409	0.3753	0.976599	282	2	-0.39343	0.16306	0.30041	0.922973	219	1	-0.39343
Ewsr1	6	0.64716	0.7715	0.994626	519	1	0.51096	0.16335	0.3405	0.939182	220	3	0.51096
NCsgRNA_62	1	0.83555	0.83641	0.994626	607	0	0.95912	0.16445	0.16406	0.922973	221	1	0.95912
Polr1e	3	0.30328	0.40823	0.981383	322	1	0.66645	0.16479	0.26752	0.922973	222	2	0.66645
Bub3	3	0.73247	0.7336	0.994626	557	0	0.94176	0.16516	0.26804	0.922973	223	2	0.94176
Kri1	5	0.28076	0.44793	0.994626	307	1	0.18818	0.16517	0.32407	0.937358	224	2	0.18818
Actb	6	0.51397	0.66802	0.994626	445	2	0.052331	0.16582	0.34381	0.939182	225	3	0.052331
Nol6	5	0.29654	0.46206	0.994626	320	2	0.52217	0.16763	0.32791	0.938189	226	3	0.52217
Cmss1	6	0.33196	0.53326	0.994626	339	2	0.2433	0.16781	0.34607	0.939182	227	3	0.2433
Rtraf	5	0.69604	0.74666	0.994626	537	1	0.51215	0.16976	0.33062	0.938189	228	3	0.51215
Rpl7	1	0.83017	0.831	0.994626	605	0	1.1689	0.16983	0.16981	0.922973	229	1	1.1689
Srsf2	3	0.15673	0.25439	0.924227	205	1	0.64061	0.17027	0.27443	0.922973	230	2	0.64061
Ddb1	3	0.77213	0.77339	0.994626	575	0	0.25845	0.1719	0.27657	0.922973	231	1	0.25845
Ola1	6	0.80112	0.833	0.994626	590	1	0.50283	0.17232	0.35147	0.939182	232	3	0.50283
Cct2	2	0.71734	0.7152	0.994626	550	0	1.0557	0.17374	0.24243	0.922973	233	1	1.0557
Srp14	6	0.89214	0.89441	0.995923	651	1	0.49241	0.17384	0.35334	0.939182	234	3	0.49241
Dhx37	4	0.035602	0.090062	0.811151	76	1	0.31405	0.17726	0.31559	0.934184	235	2	0.31405
Snrpg	3	0.67159	0.67212	0.994626	526	1	0.70041	0.17768	0.28408	0.922973	236	2	0.70041
Nop16	5	0.34293	0.50429	0.994626	341	2	0.26092	0.17807	0.34257	0.939182	237	2	0.26092
Aatf	4	0.033249	0.085107	0.811151	74	3	-1.3165	0.18229	0.32113	0.937358	238	1	-1.3165
Pwp1	5	0.21664	0.39129	0.979959	258	2	0.55005	0.18234	0.34877	0.939182	239	3	0.55005
Snrpc	6	0.19511	0.37151	0.97284	241	3	-0.23679	0.18357	0.36555	0.939182	240	2	-0.23679
Rbm14	6	0.84167	0.85687	0.994626	611	1	0.5176	0.18461	0.36674	0.939182	241	3	0.5176
Exosc9	4	0.81114	0.81131	0.994626	593	0	0.12624	0.18501	0.32396	0.937358	242	1	0.12624
Elavl1	6	0.94476	0.94526	0.998352	684	0	0.52391	0.18826	0.37152	0.939182	243	3	0.52391
Ddx51	5	0.16033	0.31408	0.971184	206	2	0.33331	0.18956	0.35927	0.939182	244	2	0.33331
Rcl1	5	0.87278	0.8729	0.994626	634	0	0.54845	0.19036	0.36042	0.939182	245	3	0.54845
Ddx17	6	0.43354	0.60591	0.994626	398	1	-0.0679	0.19236	0.37657	0.939182	246	1	-0.0679
Slx9	6	0.45679	0.62359	0.994626	416	1	-0.0056868	0.1932	0.37755	0.939182	247	2	-0.0056868
Nob1	5	0.02894	0.086286	0.811151	63	1	0.045887	0.19418	0.36619	0.939182	248	2	0.045887
Mcm7	1	0.80484	0.80681	0.994626	591	0	1.0322	0.19516	0.19471	0.922973	249	1	1.0322
H3f4	6	0.82504	0.84684	0.994626	602	1	-0.067461	0.19537	0.37992	0.941378	250	2	-0.067461
Snrnp200	3	0.91079	0.91076	0.998352	659	0	0.65186	0.19822	0.30999	0.924328	251	2	0.65186
Topbp1	4	0.049695	0.11792	0.857575	100	3	-1.0749	0.19957	0.33853	0.939182	252	1	-1.0749
Rpl35	2	0.36187	0.37686	0.977145	352	1	0.6518	0.2	0.2614	0.922973	253	1	0.6518
Trmt1l	5	0.7796	0.79618	0.994626	583	1	0.4617	0.20082	0.37585	0.939182	254	3	0.4617
Exosc5	5	0.40504	0.56011	0.994626	385	2	0.053593	0.20114	0.37639	0.939182	255	2	0.053593
Chd4	6	0.11556	0.26566	0.937889	180	2	0.39875	0.20336	0.38997	0.942434	256	3	0.39875
Dnaja1	4	0.35434	0.49378	0.994626	346	2	0.1308	0.20441	0.34336	0.939182	257	2	0.1308
S100a13	6	0.53988	0.688	0.994626	465	2	-0.060473	0.20499	0.39204	0.942434	258	1	-0.060473
Nusap1	6	0.7204	0.79731	0.994626	552	1	0.4444	0.20693	0.39447	0.942434	259	3	0.4444
Hdac1	6	0.91407	0.91462	0.998352	662	0	0.15802	0.20702	0.39463	0.942434	260	2	0.15802
Mybbp1a	5	0.63557	0.71824	0.994626	512	1	0.53551	0.20917	0.38781	0.942434	261	3	0.53551
Rpl19	3	0.011353	0.029595	0.653089	37	1	0.30789	0.21266	0.32825	0.938189	262	1	0.30789
Utp6	3	0.091101	0.16722	0.889058	148	1	0.11202	0.21388	0.32985	0.938189	263	1	0.11202
Kin	4	0.34428	0.48349	0.994626	342	2	0.16172	0.21506	0.35424	0.939182	264	2	0.16172
Arpc4	5	0.96154	0.96198	0.998352	698	0	0.32599	0.21592	0.39729	0.945689	265	2	0.32599
NCsgRNA_6	1	0.78395	0.78601	0.994626	585	0	0.72111	0.21605	0.21558	0.922973	266	1	0.72111
Emg1	4	0.041135	0.10143	0.854833	84	1	0.4372	0.21608	0.35536	0.939182	267	2	0.4372
Urb1	6	0.45306	0.62093	0.994626	411	2	0.23692	0.21791	0.40754	0.950663	268	3	0.23692
Sdad1	3	0.1677	0.26848	0.941629	213	1	-0.46323	0.21953	0.33682	0.939182	269	1	-0.46323
Wrn	6	0.41645	0.59373	0.994626	389	2	0.29801	0.21957	0.40959	0.950663	270	3	0.29801
H2bc1	6	0.61192	0.74541	0.994626	501	2	-0.20252	0.21978	0.40986	0.950663	271	2	-0.20252
Pspc1	6	0.083234	0.21115	0.897978	137	3	-0.21395	0.21978	0.40986	0.950663	272	2	-0.21395
Serf2	6	0.57467	0.71509	0.994626	481	2	0.26962	0.21978	0.40986	0.950663	273	2	0.26962
Ddx52	5	0.39638	0.55247	0.994626	376	2	0.64706	0.22126	0.40527	0.950663	274	3	0.64706
Mcm3	4	0.73501	0.74113	0.994626	561	1	0.31651	0.22326	0.3624	0.939182	275	2	0.31651
NCsgRNA_3	1	0.77604	0.77794	0.994626	581	0	0.76616	0.22396	0.22347	0.922973	276	1	0.76616
NCsgRNA_5	1	0.7754	0.7771	0.994626	580	0	0.6355	0.2246	0.22419	0.922973	277	1	0.6355
Exosc1	6	0.63421	0.76288	0.994626	510	1	0.38437	0.22623	0.41785	0.950748	278	3	0.38437
Gar1	5	0.95236	0.95251	0.998352	688	0	0.43864	0.2268	0.41339	0.950748	279	3	0.43864
NCsgRNA_10	1	0.77097	0.77272	0.994626	574	0	0.61424	0.22903	0.22895	0.922973	280	1	0.61424
Pno1	2	0.3563	0.37252	0.97284	348	1	0.49221	0.22917	0.28239	0.922973	281	1	0.49221
Anln	5	0.89764	0.89716	0.99745	654	0	0.45493	0.22923	0.41668	0.950748	282	3	0.45493
Cct7	3	0.045627	0.10244	0.854833	93	2	-1.4708	0.22994	0.3502	0.939182	283	1	-1.4708
Eftud2	4	0.0014716	0.0057128	0.351233	10	2	-2.1862	0.2305	0.36958	0.939182	284	2	-2.1862
Utp25	5	0.12037	0.25107	0.924227	185	1	0.49845	0.23069	0.41859	0.950748	285	3	0.49845
Numa1	5	0.81072	0.81813	0.994626	592	1	0.34678	0.23118	0.41919	0.950748	286	3	0.34678
Med21	6	0.48307	0.64407	0.994626	426	2	0.42297	0.23249	0.42556	0.950748	287	3	0.42297
Ccdc86	4	0.33037	0.46844	0.994626	337	2	0.1183	0.2331	0.37231	0.939182	288	2	0.1183
Nop10	5	0.14089	0.28426	0.967411	196	1	-0.063675	0.23335	0.42239	0.950748	289	2	-0.063675
Mrrf	6	0.52339	0.67518	0.994626	451	2	0.22592	0.23819	0.43257	0.954549	290	3	0.22592
Fcf1	4	0.77342	0.77481	0.994626	578	1	0.37238	0.23832	0.37774	0.939182	291	2	0.37238
Pinx1	5	0.46599	0.61483	0.994626	420	1	0.16695	0.23845	0.42954	0.950748	292	1	0.16695
Rpp30	3	0.095994	0.17406	0.889058	159	1	0.59178	0.23944	0.36195	0.939182	293	2	0.59178
Rps8	3	0.3247	0.42046	0.984973	331	1	0.5922	0.24027	0.36283	0.939182	294	2	0.5922
Pdlim7	6	0.87306	0.87915	0.994626	635	1	0.48414	0.24336	0.43859	0.959077	295	3	0.48414
Dhx9	4	0.2001	0.32868	0.971184	242	1	0.25319	0.24415	0.38361	0.942434	296	2	0.25319
Noc2l	4	0.21182	0.34111	0.971184	254	2	-0.099049	0.2462	0.3857	0.942434	297	2	-0.099049
Gtpbp4	1	0.75356	0.75517	0.994626	566	0	0.86907	0.24644	0.24632	0.922973	298	1	0.86907
Ccdc59	6	0.97014	0.97004	0.998352	701	0	-0.0049166	0.25029	0.44712	0.967808	299	2	-0.0049166
Snu13	2	0.023288	0.042794	0.756509	56	1	-1.9242	0.2507	0.29866	0.922973	300	1	-1.9242
Atrx	6	0.97298	0.97284	0.998352	705	0	0.32549	0.2509	0.44791	0.967808	301	3	0.32549
Pop1	5	0.059069	0.15128	0.889058	109	3	-0.92689	0.25172	0.44106	0.961598	302	1	-0.92689
NCsgRNA_13	1	0.7428	0.74444	0.994626	564	0	0.6674	0.2572	0.25728	0.922973	303	1	0.6674
Riox2	6	0.69095	0.78647	0.994626	536	1	0.34904	0.25792	0.4564	0.97001	304	3	0.34904
Lrp10	6	0.088829	0.22273	0.898989	146	4	-0.52477	0.25834	0.45689	0.97001	305	1	-0.52477
Fau	3	0.46812	0.50956	0.994626	421	1	-0.15341	0.26375	0.39224	0.942434	306	1	-0.15341
Ube2i	6	7.8244e-05	0.00042115	0.305755	1	4	-4.4685	0.26425	0.46363	0.97001	307	1	-4.4685
Ldha	3	0.82454	0.8254	0.994626	601	0	0.44335	0.2654	0.39422	0.942434	308	2	0.44335
Rpl5	1	0.73362	0.73486	0.994626	558	0	0.95183	0.26638	0.2671	0.922973	309	1	0.95183
Rpl13a	4	0.0041415	0.014899	0.504946	21	2	-2.4795	0.26748	0.40744	0.950663	310	1	-2.4795
Sap18	6	0.83754	0.85434	0.994626	608	1	0.041884	0.26857	0.46938	0.972746	311	2	0.041884
Npm3	6	0.50515	0.66137	0.994626	439	2	0.29489	0.27011	0.4715	0.972746	312	3	0.29489
Dhx8	5	0.097008	0.21501	0.897978	163	2	-0.055612	0.27032	0.45696	0.97001	313	2	-0.055612
Pdcd6	6	0.70973	0.79349	0.994626	544	1	0.089885	0.27547	0.47804	0.973732	314	2	0.089885
Gpatch4	6	0.85007	0.86225	0.994626	616	1	0.33394	0.27575	0.47836	0.973732	315	3	0.33394
Rpsa	4	0.17245	0.29875	0.971184	216	2	-0.42021	0.28142	0.42175	0.950748	316	1	-0.42021
Pcbp1	6	0.21075	0.39173	0.979959	253	3	-0.40608	0.28388	0.4877	0.985641	317	2	-0.40608
Rcc1	2	0.83389	0.8323	0.994626	606	0	0.76666	0.28483	0.32393	0.937358	318	1	0.76666
Fanci	6	0.81781	0.84258	0.994626	594	1	0.16986	0.28602	0.49011	0.985641	319	3	0.16986
NCsgRNA_59	1	0.71241	0.71325	0.994626	547	0	0.49689	0.28759	0.28791	0.922973	320	1	0.49689
Rps14	5	0.13731	0.27812	0.960977	194	2	0.13403	0.28802	0.47163	0.972746	321	1	0.13403
Zfp207	4	0.397	0.53992	0.994626	377	2	-0.2129	0.28831	0.42874	0.950748	322	1	-0.2129
NCsgRNA_44	1	0.71146	0.71236	0.994626	546	0	0.47757	0.28854	0.28893	0.922973	323	1	0.47757
NCsgRNA_7	1	0.70988	0.71059	0.994626	545	0	0.6294	0.29012	0.29049	0.922973	324	1	0.6294
Hspd1	5	0.39571	0.55198	0.994626	375	2	-0.2132	0.29127	0.47445	0.973022	325	2	-0.2132
NCsgRNA_45	1	0.70861	0.70921	0.994626	541	0	0.48427	0.29139	0.29168	0.922973	326	1	0.48427
Rfc2	6	0.35841	0.55176	0.994626	349	2	-0.24878	0.29389	0.49878	0.990761	327	1	-0.24878
Tma7	6	0.62002	0.75185	0.994626	504	1	0.41047	0.29394	0.49882	0.990761	328	3	0.41047
Exosc2	2	0.78975	0.78668	0.994626	587	0	0.63002	0.29443	0.33082	0.938189	329	1	0.63002
Recql	6	0.94561	0.94606	0.998352	685	0	0.2961	0.29639	0.50169	0.990761	330	3	0.2961
NCsgRNA_37	1	0.70323	0.70403	0.994626	540	0	0.65769	0.29677	0.29758	0.922973	331	1	0.65769
Mdn1	3	0.021216	0.05412	0.806082	53	2	-0.91914	0.29729	0.42473	0.950748	332	1	-0.91914
Polr2e	3	0.60004	0.60867	0.994626	494	1	-0.39533	0.29804	0.42508	0.950748	333	1	-0.39533
NCsgRNA_60	1	0.70101	0.70185	0.994626	538	0	0.49767	0.29899	0.2997	0.922973	334	1	0.49767
H1f2	6	0.37783	0.56505	0.994626	362	2	0.39089	0.30069	0.5069	0.990761	335	3	0.39089
Sarnp	6	0.82415	0.84642	0.994626	600	1	0.3298	0.3013	0.50753	0.990761	336	3	0.3298
Bop1	6	0.19077	0.36627	0.971184	232	1	-0.1654	0.30634	0.51383	0.990761	337	2	-0.1654
Rpl29	5	0.02894	0.086286	0.811151	64	1	0.30492	0.30975	0.48976	0.985641	338	2	0.30492
NCsgRNA_11	1	0.68962	0.69082	0.994626	535	0	0.46226	0.31038	0.31066	0.924328	339	1	0.46226
Rnf20	6	0.17396	0.34388	0.971184	217	2	0.064939	0.31147	0.52	0.990761	340	2	0.064939
NCsgRNA_29	1	0.6836	0.68498	0.994626	533	0	0.51828	0.3164	0.31654	0.934184	341	1	0.51828
Serbp1	6	0.25908	0.45357	0.994626	292	2	0.34403	0.32055	0.53041	0.990761	342	3	0.34403
Wdr3	4	0.14238	0.26612	0.937889	197	1	0.015989	0.32109	0.46283	0.97001	343	1	0.015989
NCsgRNA_15	1	0.67885	0.68036	0.994626	532	0	0.3899	0.32115	0.32151	0.937358	344	1	0.3899
Hnrnpa2b1	6	0.55262	0.69806	0.994626	471	2	0.16989	0.32306	0.53307	0.990761	345	3	0.16989
Rbbp4	6	0.0083971	0.033489	0.679078	31	4	-0.86012	0.3239	0.534	0.990761	346	1	-0.86012
Nudt16l1	6	0.099151	0.24289	0.924227	166	2	0.13491	0.32936	0.54016	0.990761	347	2	0.13491
Urb2	6	0.063822	0.17062	0.889058	114	4	-0.82948	0.34129	0.55362	0.990761	348	2	-0.82948
NCsgRNA_8	1	0.6567	0.65953	0.994626	522	0	0.38293	0.3433	0.34418	0.939182	349	1	0.38293
Hltf	6	0.80013	0.83253	0.994626	589	1	0.089053	0.3439	0.55643	0.990761	350	3	0.089053
Ebna1bp2	5	0.28142	0.44837	0.994626	309	2	-0.205	0.34406	0.519	0.990761	351	1	-0.205
Tpr	6	0.40824	0.58761	0.994626	387	2	-0.036526	0.34687	0.55936	0.990761	352	2	-0.036526
Thyn1	6	0.49341	0.65182	0.994626	434	1	0.032517	0.34985	0.56305	0.990761	353	2	0.032517
Snrpa	6	0.050451	0.14293	0.878998	103	3	-0.75399	0.35085	0.56398	0.990761	354	2	-0.75399
S100a4	6	0.17633	0.34712	0.971184	219	2	0.081576	0.3509	0.56405	0.990761	355	3	0.081576
Hadh	6	0.97222	0.9721	0.998352	704	0	0.19903	0.35141	0.56461	0.990761	356	2	0.19903
Prdx1	4	0.0044244	0.015989	0.504946	22	2	-0.34255	0.3521	0.4947	0.990761	357	2	-0.34255
Ddx24	3	0.32104	0.41832	0.984973	330	1	-0.23572	0.3521	0.45425	0.97001	358	1	-0.23572
NCsgRNA_56	1	0.64752	0.65032	0.994626	520	0	0.30904	0.35248	0.35323	0.939182	359	1	0.30904
Coil	6	0.59654	0.73268	0.994626	492	1	0.058525	0.35452	0.56805	0.990761	360	2	0.058525
Ctdspl2	6	0.5062	0.66208	0.994626	440	1	0.069576	0.35474	0.56828	0.990761	361	3	0.069576
H4c1	5	0.0054416	0.021043	0.545606	26	3	-1.4577	0.3564	0.5295	0.990761	362	2	-1.4577
Ppp1ca	6	0.15014	0.31199	0.971184	201	2	0.0027718	0.35858	0.57282	0.990761	363	3	0.0027718
H2bc18	6	0.27011	0.4678	0.994626	299	1	0.1411	0.35876	0.57301	0.990761	364	2	0.1411
Hnrnph1	6	0.52693	0.67793	0.994626	456	2	0.10662	0.35919	0.57359	0.990761	365	2	0.10662
NCsgRNA_57	1	0.63897	0.64154	0.994626	513	0	0.31944	0.36103	0.36121	0.939182	366	0	0.31944
Macroh2a1	6	0.16696	0.33515	0.971184	211	3	-0.45062	0.36269	0.57583	0.990761	367	1	-0.45062
Hspe1	3	0.45111	0.49868	0.994626	409	1	-0.25953	0.36481	0.4616	0.97001	368	1	-0.25953
Rbm4	6	0.42641	0.60058	0.994626	395	2	0.20779	0.3654	0.57744	0.990761	369	2	0.20779
Rpl22	6	0.58663	0.72436	0.994626	486	1	0.19703	0.36696	0.5785	0.990761	370	2	0.19703
Ilf2	6	0.25713	0.4511	0.994626	289	2	0.03966	0.36789	0.57918	0.990761	371	2	0.03966
Dek	6	0.44776	0.6168	0.994626	406	2	0.018788	0.36929	0.57991	0.990761	372	2	0.018788
Traf3	6	0.18202	0.35478	0.971184	224	3	-0.14753	0.37048	0.58075	0.990761	373	2	-0.14753
NCsgRNA_47	1	0.62884	0.63106	0.994626	507	0	0.28633	0.37116	0.37137	0.939182	374	0	0.28633
Rpl3	2	0.64451	0.64229	0.994626	515	0	0.44073	0.37295	0.39228	0.942434	375	1	0.44073
NCsgRNA_51	1	0.62346	0.62541	0.994626	506	0	0.26108	0.37654	0.37699	0.939182	376	0	0.26108
Ncl	4	0.8197	0.82014	0.994626	595	0	0.30629	0.37704	0.52025	0.990761	377	2	0.30629
Top1	5	0.17665	0.33846	0.971184	220	3	-0.27012	0.37726	0.54712	0.990761	378	1	-0.27012
Pum3	5	0.51488	0.66095	0.994626	447	1	0.38231	0.37837	0.5481	0.990761	379	2	0.38231
Ppan	5	0.047352	0.13111	0.868051	94	3	-0.43496	0.38373	0.55248	0.990761	380	1	-0.43496
Top2b	5	0.76457	0.78617	0.994626	569	1	-0.18118	0.38909	0.55658	0.990761	381	2	-0.18118
NCsgRNA_25	1	0.61048	0.61221	0.994626	500	0	0.22398	0.38952	0.39006	0.942434	382	0	0.22398
Smarca5	4	0.10434	0.22205	0.898989	168	3	-0.57621	0.39025	0.53371	0.990761	383	1	-0.57621
U2af2	6	0.032552	0.10156	0.854833	72	3	-0.6296	0.39086	0.59386	0.990761	384	1	-0.6296
Eef1g	4	0.39812	0.54113	0.994626	378	2	-0.21954	0.39548	0.53936	0.990761	385	1	-0.21954
Polr1a	3	0.22354	0.34108	0.971184	266	2	-0.60029	0.39587	0.47882	0.973732	386	1	-0.60029
Smchd1	5	0.32834	0.49114	0.994626	334	2	-0.18903	0.39971	0.56526	0.990761	387	2	-0.18903
NCsgRNA_14	1	0.59813	0.59961	0.994626	493	0	0.19302	0.40187	0.40215	0.950663	388	0	0.19302
Dnttip2	6	0.061677	0.1663	0.889058	113	3	-0.69572	0.40455	0.60294	0.997124	389	2	-0.69572
Ncapg2	5	0.010237	0.034609	0.679078	34	3	-0.9564	0.40597	0.57059	0.990761	390	1	-0.9564
NCsgRNA_9	1	0.58832	0.58928	0.994626	487	0	0.20783	0.41168	0.41191	0.950748	391	0	0.20783
Trmt6	4	0.068467	0.15473	0.889058	118	2	-0.44515	0.41219	0.55739	0.990761	392	2	-0.44515
Nop56	4	0.19258	0.32085	0.971184	236	1	0.075327	0.41388	0.55936	0.990761	393	2	0.075327
Banf1	2	0.86411	0.86267	0.994626	624	0	0.56064	0.41678	0.42888	0.950748	394	1	0.56064
Rrp15	4	0.31348	0.44995	0.994626	326	1	-0.047366	0.41773	0.56358	0.990761	395	2	-0.047366
Wdr46	5	0.054669	0.14408	0.878998	106	2	-0.40986	0.42099	0.58329	0.990761	396	2	-0.40986
Cdk9	5	0.22479	0.3986	0.979959	267	2	0.092837	0.42146	0.58373	0.990761	397	2	0.092837
H1f3	6	0.98185	0.9817	0.998352	710	0	0.079985	0.42161	0.61441	0.998362	398	2	0.079985
Prpf19	5	0.0048282	0.01912	0.530909	24	4	-1.5969	0.4235	0.58556	0.990761	399	1	-1.5969
Vdac1	6	0.94726	0.94752	0.998352	686	0	-0.054868	0.42401	0.61578	0.998362	400	1	-0.054868
NCsgRNA_27	1	0.57154	0.57225	0.994626	480	0	0.16633	0.42846	0.42848	0.950748	401	0	0.16633
Rps6	3	0.036675	0.088506	0.811151	81	2	-1.0561	0.43309	0.50095	0.990761	402	1	-1.0561
Kdm3b	5	0.37503	0.53375	0.994626	361	2	-0.172	0.43361	0.59363	0.990761	403	1	-0.172
Hp1bp3	6	0.91863	0.91899	0.998352	667	0	0.17425	0.43406	0.62243	0.998362	404	2	0.17425
NCsgRNA_31	1	0.56584	0.56673	0.994626	477	0	0.16024	0.43416	0.43427	0.955385	405	0	0.16024
H2ac18	5	0.89269	0.89252	0.995342	652	0	0.18208	0.43662	0.59613	0.990761	406	2	0.18208
Rpl36a	4	0.023567	0.064644	0.806426	58	2	-1.6779	0.43773	0.5847	0.990761	407	1	-1.6779
Arl6ip4	5	0.11679	0.24563	0.924227	184	1	-0.21093	0.43819	0.59744	0.990761	408	2	-0.21093
NCsgRNA_64	1	0.56173	0.56261	0.994626	476	0	0.19462	0.43827	0.43856	0.959077	409	0	0.19462
Ezh2	6	0.10791	0.25461	0.924227	173	3	-0.51949	0.4394	0.6262	0.998362	410	2	-0.51949
Ncapd3	3	0.065922	0.13152	0.868051	117	2	-0.85467	0.44086	0.50612	0.990761	411	1	-0.85467
NCsgRNA_20	1	0.55476	0.55532	0.994626	472	0	0.14076	0.44524	0.44524	0.967787	412	0	0.14076
Knop1	6	0.021245	0.073325	0.811151	54	4	-0.76373	0.44624	0.63084	0.998362	413	2	-0.76373
Rps11	2	0.58277	0.58048	0.994626	485	0	0.22241	0.44778	0.45443	0.97001	414	1	0.22241
Hdac2	6	0.30069	0.50484	0.994626	321	3	-0.28523	0.4523	0.63507	0.998362	415	2	-0.28523
NCsgRNA_2	1	0.5459	0.54627	0.994626	467	0	0.095093	0.4541	0.45407	0.97001	416	0	0.095093
Srfbp1	3	0.21353	0.32801	0.971184	255	2	-0.4675	0.45428	0.51489	0.990761	417	1	-0.4675
Sltm	6	0.1265	0.27929	0.960977	187	3	-0.33557	0.4545	0.63671	0.998362	418	1	-0.33557
Tap2	6	0.87374	0.87971	0.994626	636	1	-0.18556	0.45564	0.63748	0.998362	419	1	-0.18556
Dimt1	6	0.028137	0.090617	0.811151	61	4	-0.81526	0.45907	0.63974	0.998362	420	1	-0.81526
Rif1	6	0.094534	0.23488	0.91188	155	3	-0.37375	0.46021	0.64055	0.998362	421	2	-0.37375
Mphosph6	4	0.25307	0.38469	0.978857	287	2	-0.25051	0.46119	0.59773	0.990761	422	1	-0.25051
Eif5b	6	0.28316	0.48398	0.994626	310	2	-0.42265	0.46134	0.64138	0.998362	423	1	-0.42265
NCsgRNA_50	1	0.53799	0.53778	0.994626	464	0	0.079793	0.46201	0.462	0.97001	424	0	0.079793
Mcm2	6	0.36918	0.55916	0.994626	355	2	-0.19831	0.46212	0.64191	0.998362	425	2	-0.19831
Krr1	1	0.53767	0.53736	0.994626	463	0	0.099299	0.46233	0.46227	0.97001	426	0	0.099299
Bms1	3	0.15438	0.25146	0.924227	204	2	-0.55911	0.46687	0.52232	0.990761	427	1	-0.55911
NCsgRNA_18	1	0.53102	0.53097	0.994626	460	0	0.057839	0.46898	0.46856	0.972746	428	0	0.057839
NCsgRNA_55	1	0.52976	0.52973	0.994626	458	0	0.066457	0.47024	0.47	0.972746	429	0	0.066457
Rpl12	2	0.44637	0.44949	0.994626	404	1	-0.014457	0.47059	0.47435	0.973022	430	1	-0.014457
Sppl3	6	0.93473	0.9353	0.998352	677	0	0.02149	0.47412	0.6506	0.998362	431	2	0.02149
Rps12	4	0.059715	0.13791	0.874876	110	3	-0.81431	0.47694	0.60432	0.99713	432	1	-0.81431
Wdr12	5	0.23972	0.41137	0.982321	278	2	-0.22139	0.47833	0.63147	0.998362	433	1	-0.22139
Rpl10a	3	0.48416	0.52025	0.994626	428	1	-0.37634	0.47987	0.53032	0.990761	434	1	-0.37634
NCsgRNA_53	1	0.51045	0.51035	0.994626	443	0	0.013298	0.48955	0.4893	0.985641	435	0	0.013298
Rps10	6	0.78371	0.82456	0.994626	584	1	-0.0050334	0.49233	0.66293	0.998362	436	1	-0.0050334
Prpf3	6	0.049102	0.13979	0.874876	98	3	-0.79802	0.49418	0.66417	0.998362	437	2	-0.79802
Wdr36	4	0.28964	0.42428	0.990435	313	2	-0.39659	0.50067	0.615	0.998362	438	1	-0.39659
Dusp11	6	0.017909	0.065526	0.806426	42	2	0.00034976	0.50081	0.66906	0.998362	439	2	0.00034976
NCsgRNA_35	1	0.49683	0.49663	0.994626	436	0	-0.019571	0.50317	0.50329	0.990761	440	0	-0.019571
NCsgRNA_24	1	0.49462	0.49434	0.994626	435	0	-0.02652	0.50538	0.50537	0.990761	441	0	-0.02652
Dhx33	4	0.021128	0.059382	0.806082	51	2	-1.5133	0.50741	0.61876	0.998362	442	1	-1.5133
NCsgRNA_49	1	0.49177	0.49156	0.994626	431	0	-0.042293	0.50823	0.50822	0.990761	443	0	-0.042293
Rps2	3	0.18688	0.29394	0.971184	229	1	0.33536	0.5088	0.54889	0.990761	444	1	0.33536
Nolc1	5	0.98743	0.98735	0.998352	718	0	0.42282	0.51099	0.65991	0.998362	445	2	0.42282
Nsun5	6	0.90403	0.90546	0.998352	656	1	-0.091432	0.51106	0.67648	0.998362	446	2	-0.091432
Ifi204	6	0.91258	0.91335	0.998352	661	0	0.038081	0.51145	0.67676	0.998362	447	2	0.038081
Ssrp1	4	0.60994	0.6535	0.994626	498	1	-0.22149	0.51407	0.62205	0.998362	448	1	-0.22149
Mlkl	6	0.92927	0.92949	0.998352	674	0	-0.10051	0.51562	0.67965	0.998362	449	2	-0.10051
Rps4x	2	0.20028	0.2513	0.924227	243	1	-0.91253	0.51786	0.51728	0.990761	450	1	-0.91253
Utp11	5	0.021186	0.065536	0.806426	52	1	0.14648	0.52306	0.6706	0.998362	451	2	0.14648
Lbhd1	6	0.38636	0.57139	0.994626	368	2	-0.1371	0.52489	0.68612	0.998362	452	2	-0.1371
Fen1	5	0.49239	0.63971	0.994626	433	2	0.20167	0.52937	0.67558	0.998362	453	2	0.20167
Rpl10	2	0.071788	0.12642	0.868051	123	1	-1.5848	0.53009	0.52838	0.990761	454	1	-1.5848
Hnrnpr	6	0.54627	0.69315	0.994626	468	2	-0.010486	0.53131	0.6906	0.998362	455	2	-0.010486
Bud23	5	0.16582	0.32258	0.971184	209	2	0.15036	0.53314	0.67893	0.998362	456	2	0.15036
Cutc	6	0.57626	0.71613	0.994626	482	2	-0.15482	0.53489	0.69336	0.998362	457	2	-0.15482
NCsgRNA_26	1	0.46328	0.46322	0.994626	419	0	-0.11598	0.53672	0.53649	0.990761	458	0	-0.11598
Zfp622	6	0.87031	0.87707	0.994626	631	1	0.26979	0.53702	0.69481	0.998362	459	2	0.26979
Zfp638	6	0.26087	0.45562	0.994626	294	3	-0.1705	0.53917	0.69626	0.998362	460	2	-0.1705
Rrp36	5	0.11616	0.24461	0.924227	182	3	-0.7609	0.54177	0.68673	0.998362	461	1	-0.7609
NCsgRNA_32	1	0.45726	0.45728	0.994626	418	0	-0.10977	0.54274	0.54271	0.990761	462	0	-0.10977
Ruvbl2	1	0.45568	0.45577	0.994626	414	0	-0.11936	0.54432	0.54425	0.990761	463	0	-0.11936
NCsgRNA_40	1	0.45188	0.45185	0.994626	410	0	-0.12108	0.54812	0.54831	0.990761	464	0	-0.12108
Taf15	6	0.245	0.43574	0.994626	283	2	-0.063476	0.54981	0.70372	0.998362	465	2	-0.063476
Ddx50	6	0.29394	0.49639	0.994626	317	3	-0.35009	0.55472	0.70743	0.998362	466	1	-0.35009
2310033P09Rik	6	0.20206	0.38074	0.978857	245	3	-0.31053	0.55762	0.70942	0.998362	467	1	-0.31053
Fus	6	0.91745	0.91788	0.998352	666	0	0.09284	0.55858	0.71	0.998362	468	1	0.09284
Xpo1	5	0.12928	0.26529	0.937889	189	3	-0.76888	0.56012	0.70272	0.998362	469	1	-0.76888
Skp1	5	0.44742	0.59802	0.994626	405	2	-0.053403	0.56258	0.70478	0.998362	470	1	-0.053403
Xrcc5	6	0.59565	0.7319	0.994626	491	1	0.065736	0.56336	0.71333	0.998362	471	1	0.065736
Pelo	4	0.082769	0.18198	0.889058	135	2	-0.59263	0.56432	0.64642	0.998362	472	1	-0.59263
Eif2ak2	6	0.49934	0.6566	0.994626	437	2	-0.10223	0.56451	0.71396	0.998362	473	2	-0.10223
Sfpq	3	0.76605	0.76726	0.994626	570	0	-0.20506	0.56504	0.58931	0.990761	474	1	-0.20506
H1f5	6	0.38016	0.56683	0.994626	364	2	-0.25992	0.56527	0.71451	0.998362	475	1	-0.25992
Wdr5	2	0.065066	0.11538	0.857575	116	1	-2.0468	0.56563	0.56395	0.990761	476	1	-2.0468
Wdr18	3	0.91472	0.91493	0.998352	663	0	0.30726	0.56667	0.59056	0.990761	477	1	0.30726
Top2a	3	0.0012147	0.0033543	0.333183	7	2	-5.2196	0.56721	0.5909	0.990761	478	1	-5.2196
Tex10	6	0.091191	0.22768	0.898989	149	2	-0.16152	0.57144	0.71912	0.998362	479	2	-0.16152
Rpp38	5	0.16582	0.32258	0.971184	207	1	0.094706	0.57149	0.71278	0.998362	480	2	0.094706
Eif2a	5	0.45596	0.60579	0.994626	415	2	-0.0013841	0.57271	0.71384	0.998362	481	2	-0.0013841
Dis3	3	0.00047476	0.0014022	0.333183	3	1	0.21965	0.57478	0.59602	0.990761	482	1	0.21965
Hnrnpab	6	0.75872	0.813	0.994626	568	1	-0.14179	0.57626	0.72244	0.998362	483	2	-0.14179
Smc1a	4	0.051564	0.12159	0.861389	104	2	-0.59794	0.57907	0.65408	0.998362	484	1	-0.59794
NCsgRNA_42	1	0.42023	0.42058	0.984973	392	0	-0.17937	0.57977	0.58085	0.990761	485	0	-0.17937
Rpl14	1	0.41833	0.41858	0.984973	390	0	-0.25014	0.58167	0.58262	0.990761	486	0	-0.25014
NCsgRNA_65	1	0.41548	0.41576	0.984973	388	0	-0.21027	0.58452	0.58549	0.990761	487	0	-0.21027
Tcea1	6	0.6327	0.76167	0.994626	509	2	-0.071047	0.58786	0.73084	0.998362	488	2	-0.071047
NCsgRNA_61	1	0.40598	0.40583	0.979959	386	0	-0.22149	0.59402	0.59499	0.990761	489	0	-0.22149
Anxa2	6	0.86395	0.87198	0.994626	623	1	0.014931	0.59461	0.73583	0.998362	490	2	0.014931
Tsr1	3	0.72732	0.72854	0.994626	555	0	0.1281	0.59486	0.61173	0.998362	491	1	0.1281
Rps19bp1	5	0.86753	0.86754	0.994626	628	0	-0.0068317	0.59506	0.72467	0.998362	492	1	-0.0068317
Incenp	5	0.041442	0.11876	0.857575	87	3	-0.94663	0.59736	0.72538	0.998362	493	1	-0.94663
Xrcc1	6	0.88133	0.88514	0.994626	642	1	0.13289	0.59864	0.739	0.998362	494	2	0.13289
Tent4b	6	0.51145	0.66611	0.994626	444	1	0.15664	0.60064	0.74042	0.998362	495	2	0.15664
Nudt21	5	0.025967	0.078032	0.811151	60	3	-0.82901	0.60117	0.72656	0.998362	496	1	-0.82901
D8Ertd738e	6	0.21591	0.39824	0.979959	257	2	-0.0078002	0.60531	0.74399	0.998362	497	2	-0.0078002
Ptbp1	5	0.92702	0.92752	0.998352	671	0	0.23404	0.60645	0.72858	0.998362	498	1	0.23404
Ring1	6	0.27087	0.46896	0.994626	301	2	-0.11441	0.60712	0.74537	0.998362	499	1	-0.11441
Uggt1	6	0.060367	0.1636	0.889058	111	4	-0.60437	0.60973	0.74732	0.998362	500	1	-0.60437
Hmga1	6	0.045432	0.13109	0.868051	92	3	-0.64457	0.61258	0.74949	0.998362	501	2	-0.64457
Ddx10	2	0.52399	0.52122	0.994626	454	1	0.022506	0.61367	0.61144	0.998362	502	0	0.022506
NCsgRNA_39	1	0.38509	0.38561	0.978857	366	0	-0.26134	0.61491	0.61658	0.998362	503	0	-0.26134
Apex1	6	0.21957	0.40295	0.979959	260	3	-0.41895	0.62002	0.75495	0.998362	504	1	-0.41895
Bzw2	6	0.4786	0.64063	0.994626	424	2	0.12301	0.62108	0.7558	0.998362	505	2	0.12301
Ddx46	5	0.040158	0.11504	0.857575	83	3	-1.0165	0.62558	0.7353	0.998362	506	1	-1.0165
Stub1	6	0.93946	0.93981	0.998352	680	0	0.2448	0.62691	0.75954	0.998362	507	2	0.2448
Ugcg	6	0.3724	0.56147	0.994626	358	2	-0.17161	0.63142	0.7632	0.998362	508	2	-0.17161
Parp1	6	0.51905	0.67175	0.994626	449	2	0.058388	0.63174	0.76341	0.998362	509	2	0.058388
Cebpz	4	0.40067	0.54413	0.994626	380	1	-0.15422	0.63375	0.68324	0.998362	510	1	-0.15422
Pqbp1	6	0.88482	0.88786	0.994626	645	1	0.07505	0.63398	0.76502	0.998362	511	2	0.07505
Hnrnpk	3	0.10881	0.19131	0.889058	176	1	-0.53785	0.63408	0.64291	0.998362	512	1	-0.53785
Srsf6	5	0.0071022	0.02576	0.623381	29	3	-0.6133	0.63486	0.7389	0.998362	513	1	-0.6133
Rps19	2	0.035762	0.064456	0.806426	77	1	-2.5141	0.63577	0.6337	0.998362	514	0	-2.5141
Xrcc6	6	0.61913	0.75115	0.994626	503	2	-0.1452	0.63667	0.76716	0.998362	515	1	-0.1452
Chd3	6	0.38558	0.57089	0.994626	367	2	0.042908	0.63717	0.76751	0.998362	516	2	0.042908
Eef1a2	6	0.32527	0.52883	0.994626	332	1	-0.13194	0.63971	0.76953	0.998362	517	2	-0.13194
Hnrnpdl	5	0.33155	0.49375	0.994626	338	2	-0.3382	0.64049	0.74127	0.998362	518	1	-0.3382
Psmc3ip	6	0.44294	0.61304	0.994626	403	1	-0.084744	0.64224	0.77148	0.998362	519	2	-0.084744
NCsgRNA_4	1	0.3547	0.35545	0.971184	347	0	-0.34932	0.6453	0.64804	0.998362	520	0	-0.34932
Lyar	6	0.6045	0.73924	0.994626	495	2	0.27612	0.64539	0.7739	0.998362	521	2	0.27612
Ddx3x	6	0.044412	0.12883	0.868051	90	3	-0.75293	0.64601	0.77443	0.998362	522	2	-0.75293
Pa2g4	6	0.091763	0.22908	0.898989	152	4	-0.5966	0.64727	0.77539	0.998362	523	2	-0.5966
Nop2	5	0.018875	0.059144	0.806082	47	3	-1.2301	0.64879	0.74439	0.998362	524	1	-1.2301
Esf1	3	0.10881	0.19131	0.889058	178	1	-0.20631	0.64941	0.65526	0.998362	525	1	-0.20631
Rps18	2	0.70972	0.70775	0.994626	543	0	0.067055	0.65015	0.6483	0.998362	526	0	0.067055
Hnrnpc	6	0.50668	0.66248	0.994626	441	2	-0.2669	0.65113	0.7785	0.998362	527	1	-0.2669
Eef1a1	4	0.54218	0.61393	0.994626	466	1	-0.023184	0.65131	0.69366	0.998362	528	1	-0.023184
Atrip	6	0.084911	0.21475	0.897978	139	3	-0.48456	0.65164	0.77894	0.998362	529	2	-0.48456
Xrn2	4	0.22236	0.35229	0.971184	265	1	-0.062421	0.65189	0.69398	0.998362	530	1	-0.062421
Polr2l	3	0.22072	0.33721	0.971184	262	2	-0.64653	0.65364	0.65871	0.998362	531	1	-0.64653
NCsgRNA_33	1	0.3452	0.346	0.971184	343	0	-0.39528	0.6548	0.6576	0.998362	532	0	-0.39528
Rpl15	2	0.097229	0.16737	0.889058	164	1	-0.85583	0.65945	0.65751	0.998362	533	0	-0.85583
Polr1g	6	0.2921	0.49418	0.994626	316	3	-0.12833	0.66357	0.78772	0.998362	534	1	-0.12833
Cenpb	6	0.57745	0.717	0.994626	483	1	0.083131	0.66519	0.78896	0.998362	535	2	0.083131
Tufm	6	0.13182	0.28684	0.967411	190	3	-0.45343	0.66663	0.79006	0.998362	536	1	-0.45343
NCsgRNA_28	1	0.32874	0.32885	0.971184	335	1	-0.38281	0.67126	0.6734	0.998362	537	0	-0.38281
Rpp14	5	0.073135	0.17466	0.889058	124	3	-0.56604	0.67277	0.75375	0.998362	538	1	-0.56604
NCsgRNA_52	1	0.32716	0.32725	0.971184	333	1	-0.56085	0.67284	0.67489	0.998362	539	0	-0.56085
Prkdc	6	0.95392	0.95385	0.998352	692	0	-0.15324	0.67306	0.79504	0.998362	540	2	-0.15324
Rpl17	3	0.37041	0.44698	0.994626	357	1	0.33433	0.67653	0.6794	0.998362	541	1	0.33433
Zfp326	6	0.41952	0.59596	0.994626	391	2	-0.31047	0.68082	0.8012	0.998362	542	2	-0.31047
Ran	1	0.31735	0.31741	0.971184	328	1	-0.63454	0.68265	0.68402	0.998362	543	0	-0.63454
Mki67	6	0.95244	0.95255	0.998352	690	0	-0.01865	0.68301	0.8028	0.998362	544	1	-0.01865
Hspa9	4	0.03189	0.08256	0.811151	69	3	-1.3038	0.68559	0.71432	0.998362	545	1	-1.3038
Farsb	4	0.018497	0.053813	0.806082	44	3	-1.2672	0.68771	0.71581	0.998362	546	1	-1.2672
Manf	6	0.93374	0.93418	0.998352	675	0	-0.1763	0.69023	0.80705	0.998362	547	1	-0.1763
Atr	5	0.0084253	0.029604	0.653089	32	3	-0.95595	0.69113	0.76166	0.998362	548	1	-0.95595
Shmt2	6	0.10782	0.2545	0.924227	172	2	-0.1527	0.6945	0.80843	0.998362	549	1	-0.1527
Mak16	2	0.073921	0.12979	0.868051	125	1	-2.2384	0.70852	0.70663	0.998362	550	0	-2.2384
Ercc2	4	0.73781	0.7433	0.994626	563	1	0.093235	0.70934	0.73047	0.998362	551	1	0.093235
NCsgRNA_16	1	0.29012	0.29049	0.967411	314	1	-0.45033	0.70988	0.71059	0.998362	552	0	-0.45033
Tap1	6	0.32936	0.5316	0.994626	336	2	-0.13261	0.7131	0.81429	0.998362	553	1	-0.13261
NCsgRNA_41	1	0.27208	0.27269	0.951802	303	1	-0.5243	0.72792	0.72962	0.998362	554	0	-0.5243
Hsd17b4	5	0.024965	0.075644	0.811151	59	4	-0.7543	0.72817	0.77859	0.998362	555	1	-0.7543
Senp3	6	0.51688	0.67014	0.994626	448	2	-0.26115	0.72883	0.81947	0.998362	556	1	-0.26115
Pes1	4	0.041197	0.10156	0.854833	85	3	-1.0924	0.73172	0.74567	0.998362	557	1	-1.0924
Rpl4	3	0.017466	0.044865	0.757487	41	1	0.30423	0.73247	0.7336	0.998362	558	0	0.30423
NCsgRNA_22	1	0.26543	0.26607	0.937889	295	1	-0.66438	0.73457	0.73577	0.998362	559	0	-0.66438
Srp72	3	0.63456	0.63803	0.994626	511	1	-0.44578	0.73483	0.73575	0.998362	560	0	-0.44578
Polr1d	6	0.1896	0.36474	0.971184	231	2	-0.056653	0.7358	0.8217	0.998362	561	1	-0.056653
Hnrnpa1	4	0.51994	0.60278	0.994626	450	1	-0.35681	0.7392	0.7513	0.998362	562	1	-0.35681
NCsgRNA_1	1	0.25973	0.25987	0.933987	293	1	-0.54086	0.74027	0.74171	0.998362	563	0	-0.54086
Rps5	1	0.25847	0.25875	0.933987	291	1	-0.91056	0.74153	0.74309	0.998362	564	0	-0.91056
Rsl24d1	5	0.094946	0.21175	0.897978	157	3	-0.6148	0.74291	0.78616	0.998362	565	1	-0.6148
Rpl28	4	0.002662	0.0098946	0.399081	17	3	-3.2736	0.74333	0.75434	0.998362	566	1	-3.2736
NCsgRNA_54	1	0.2534	0.25331	0.924227	288	1	-0.66658	0.7466	0.74801	0.998362	567	0	-0.66658
Nosip	6	0.40336	0.58409	0.994626	383	2	-0.2852	0.74687	0.82554	0.998362	568	1	-0.2852
Mdh2	6	0.45079	0.6191	0.994626	408	2	-0.082569	0.74748	0.82578	0.998362	569	1	-0.082569
Rfc1	6	0.17689	0.34779	0.971184	221	3	-0.2363	0.74988	0.82666	0.998362	570	1	-0.2363
Polr2h	3	0.2288	0.34788	0.971184	271	2	-0.27012	0.76713	0.76841	0.998362	571	0	-0.27012
Serpinh1	6	0.53702	0.68597	0.994626	462	1	-0.12196	0.76731	0.8332	0.998362	572	1	-0.12196
Smarca4	6	0.63077	0.76008	0.994626	508	2	0.070958	0.76843	0.83361	0.998362	573	1	0.070958
NCsgRNA_30	1	0.2284	0.22832	0.898989	270	1	-0.83813	0.7716	0.77337	0.998362	574	0	-0.83813
Lmnb1	5	0.65828	0.72866	0.994626	523	1	0.027175	0.77291	0.80285	0.998362	575	1	0.027175
Lmna	6	0.04867	0.13877	0.874876	97	4	-0.712	0.77344	0.83545	0.998362	576	1	-0.712
NCsgRNA_21	1	0.22618	0.22588	0.898989	268	1	-0.64452	0.77382	0.77563	0.998362	577	0	-0.64452
Nsa2	2	0.36994	0.38375	0.978857	356	1	-0.52714	0.77528	0.77251	0.998362	578	0	-0.52714
Fam136a	4	0.37788	0.51919	0.994626	363	2	-0.39386	0.77631	0.78065	0.998362	579	1	-0.39386
Abt1	3	0.20407	0.31566	0.971184	246	2	-0.47411	0.77636	0.77757	0.998362	580	0	-0.47411
Utp15	3	0.095994	0.17406	0.889058	160	2	-1.2587	0.77984	0.78109	0.998362	581	0	-1.2587
Arpc1b	6	0.089751	0.22477	0.898989	147	3	-0.20384	0.78051	0.83838	0.998362	582	1	-0.20384
Exosc3	3	0.014177	0.036818	0.703427	40	2	-2.2169	0.78087	0.78221	0.998362	583	0	-2.2169
Rps15a	3	0.2076	0.32006	0.971184	251	2	-0.72148	0.78533	0.78657	0.998362	584	0	-0.72148
Csnk1d	6	0.56868	0.71024	0.994626	478	2	-0.20418	0.78844	0.84168	0.998362	585	1	-0.20418
Hspa8	4	0.23414	0.36479	0.971184	274	2	-0.46415	0.7896	0.79182	0.998362	586	1	-0.46415
Cbx1	5	0.59275	0.70041	0.994626	490	1	-0.31714	0.79024	0.81281	0.998362	587	1	-0.31714
NCsgRNA_36	1	0.20814	0.20781	0.897978	252	1	-0.74309	0.79186	0.79363	0.998362	588	0	-0.74309
Ddx54	1	0.20497	0.20482	0.897978	249	1	-0.97307	0.79503	0.79682	0.998362	589	0	-0.97307
NCsgRNA_63	1	0.2018	0.20149	0.897978	244	1	-0.81133	0.7982	0.80022	0.998362	590	0	-0.81133
Rpl23	2	0.52399	0.52122	0.994626	452	1	-0.63067	0.79979	0.79685	0.998362	591	0	-0.63067
Vim	6	0.27157	0.46963	0.994626	302	1	0.040964	0.80063	0.8466	0.998362	592	1	0.040964
Kpna3	5	0.1427	0.28681	0.967411	198	3	-0.50273	0.80091	0.81892	0.998362	593	1	-0.50273
Hnrnpll	6	0.82813	0.84881	0.994626	603	1	0.13169	0.80358	0.84797	0.998362	594	1	0.13169
Polr1c	3	0.76713	0.76841	0.994626	573	0	-0.24072	0.80671	0.80744	0.998362	595	0	-0.24072
NCsgRNA_19	1	0.19294	0.19255	0.889058	238	1	-1.0454	0.80706	0.80887	0.998362	596	0	-1.0454
Sf3b2	5	0.038953	0.11205	0.857575	82	4	-1.0497	0.8082	0.82373	0.998362	597	1	-1.0497
Nol10	4	0.89067	0.89051	0.994626	650	0	0.12864	0.8151	0.81584	0.998362	598	1	0.12864
NCsgRNA_17	1	0.18471	0.18407	0.889058	226	1	-1.1995	0.81529	0.81646	0.998362	599	0	-1.1995
Sumo1	5	0.005978	0.02244	0.561771	27	3	-0.88306	0.81568	0.8287	0.998362	600	1	-0.88306
Zcrb1	6	0.13317	0.28867	0.967411	191	3	-0.44295	0.81781	0.85482	0.998362	601	1	-0.44295
Gnl3l	6	0.39023	0.5743	0.994626	372	2	-0.21854	0.82236	0.85719	0.998362	602	1	-0.21854
Fbl	5	0.19418	0.36489	0.971184	240	1	0.080944	0.82293	0.834	0.998362	603	1	0.080944
Rfc3	4	0.064838	0.14795	0.889058	115	2	-0.28678	0.82524	0.82551	0.998362	604	0	-0.28678
Smc4	1	0.17236	0.17233	0.889058	215	1	-1.2535	0.82764	0.8285	0.998362	605	0	-1.2535
Atp5if1	6	0.72883	0.80079	0.994626	556	1	-0.16718	0.829	0.86048	0.998362	606	1	-0.16718
Wdr89	6	0.24802	0.43944	0.994626	284	3	-0.40016	0.83074	0.86124	0.998362	607	1	-0.40016
NCsgRNA_46	1	0.1673	0.16723	0.889058	212	1	-0.80899	0.8327	0.83361	0.998362	608	0	-0.80899
Cpsf6	6	0.073928	0.19236	0.889058	126	3	-0.55199	0.83417	0.86316	0.998362	609	1	-0.55199
H2ac4	6	0.52987	0.68006	0.994626	459	2	-0.037507	0.84003	0.86602	0.998362	610	1	-0.037507
Rpl27	4	0.08704	0.19016	0.889058	143	3	-0.71946	0.84014	0.84046	0.998362	611	0	-0.71946
Imp3	2	0.032962	0.059947	0.806082	73	1	-2.7621	0.84053	0.839	0.998362	612	0	-2.7621
Pnkp	5	0.23845	0.41033	0.982321	275	1	-0.11535	0.84078	0.84667	0.998362	613	1	-0.11535
Actr3	6	0.13426	0.29026	0.967411	192	2	-0.1825	0.84532	0.86886	0.998362	614	1	-0.1825
Adarb2	5	0.10855	0.23297	0.909318	174	2	0.060223	0.84546	0.85036	0.998362	615	1	0.060223
Tspyl1	6	0.010711	0.041674	0.756385	36	5	-0.58663	0.8485	0.87057	0.998362	616	1	-0.58663
H2bc12	4	0.094545	0.20412	0.897978	156	2	-1.1213	0.84983	0.85011	0.998362	617	0	-1.1213
Rbm28	3	0.23154	0.351	0.971184	272	1	-0.16123	0.85079	0.85155	0.998362	618	0	-0.16123
Imp4	4	0.86762	0.86797	0.994626	629	0	0.094112	0.85226	0.85247	0.998362	619	0	0.094112
Usp36	5	0.8892	0.88896	0.994626	649	0	-0.15782	0.86047	0.86257	0.998362	620	1	-0.15782
Rps24	3	0.23908	0.36072	0.971184	277	1	-0.44519	0.86123	0.86208	0.998362	621	0	-0.44519
Mcm5	5	0.079439	0.18506	0.889058	133	2	-0.057828	0.86145	0.86344	0.998362	622	1	-0.057828
Cdk7	4	0.24936	0.38086	0.978857	285	2	-0.63691	0.86226	0.86226	0.998362	623	0	-0.63691
Ddx39a	6	0.82326	0.84584	0.994626	598	1	0.1174	0.86646	0.88133	0.998362	624	1	0.1174
Hnrnpu	2	0.2891	0.3187	0.971184	312	1	-0.63781	0.86966	0.86859	0.998362	625	0	-0.63781
Adar	5	0.0022203	0.0095973	0.399081	14	3	-2.4493	0.87126	0.87203	0.998362	626	1	-2.4493
Rbm19	5	0.13731	0.27812	0.960977	195	3	-0.46429	0.87309	0.87372	0.998362	627	1	-0.46429
Dcaf13	4	0.00062462	0.0025319	0.333183	4	3	-3.3871	0.87576	0.87615	0.998362	628	0	-3.3871
Spats2l	5	0.52631	0.67158	0.994626	455	1	0.11516	0.87669	0.87746	0.998362	629	1	0.11516
Cdkn2b	6	0.19104	0.36653	0.971184	234	3	-0.21716	0.87873	0.88902	0.998362	630	1	-0.21716
Eif6	4	0.27879	0.41268	0.982321	306	2	-0.36328	0.87917	0.87957	0.998362	631	0	-0.36328
Cpsf7	6	0.036237	0.11018	0.857575	79	4	-0.72481	0.88197	0.89114	0.998362	632	1	-0.72481
Api5	6	0.21902	0.40221	0.979959	259	3	-0.25914	0.88292	0.89174	0.998362	633	1	-0.25914
B2m	6	0.71842	0.79655	0.994626	551	1	0.053232	0.88324	0.89195	0.998362	634	1	0.053232
Gtf2b	4	0.088766	0.19349	0.889058	145	2	-0.9164	0.88327	0.88349	0.998362	635	0	-0.9164
NCsgRNA_38	1	0.11665	0.11713	0.857575	183	1	-1.0217	0.88335	0.88393	0.998362	636	0	-1.0217
Rexo4	6	0.18674	0.36074	0.971184	228	2	-0.11644	0.88387	0.89231	0.998362	637	1	-0.11644
Eif4a1	4	0.029918	0.078379	0.811151	68	3	-1.1372	0.88452	0.88452	0.998362	638	0	-1.1372
Luc7l2	5	0.093043	0.20849	0.897978	154	3	-0.69955	0.88756	0.88753	0.998362	639	0	-0.69955
Sf3b6	4	0.91603	0.91486	0.998352	664	0	0.011117	0.88873	0.88846	0.998362	640	0	0.011117
Eif5a2	6	0.67787	0.78174	0.994626	531	1	-0.038083	0.89035	0.89707	0.998362	641	1	-0.038083
Bzw1	4	0.85256	0.85277	0.994626	618	0	0.008046	0.89067	0.89051	0.998362	642	0	0.008046
Rbm3	5	0.19351	0.36418	0.971184	239	3	-0.48102	0.89082	0.8906	0.998362	643	0	-0.48102
Rbm8a	3	0.1027	0.18318	0.889058	167	2	-1.0719	0.89111	0.8918	0.998362	644	0	-1.0719
NCsgRNA_34	1	0.10874	0.10947	0.857575	175	1	-1.228	0.89126	0.89228	0.998362	645	0	-1.228
Eif4a3	3	0.022407	0.056796	0.806082	55	2	-2.2504	0.89411	0.89462	0.998362	646	0	-2.2504
Srsf1	2	0.10497	0.17933	0.889058	169	2	-0.96224	0.89503	0.89398	0.998362	647	0	-0.96224
Atm	6	0.044816	0.12963	0.868051	91	4	-1.0105	0.89508	0.90034	0.998362	648	1	-1.0105
Kif2c	6	0.14777	0.30891	0.971184	200	3	-0.47006	0.89738	0.90214	0.998362	649	1	-0.47006
NCsgRNA_48	1	0.098924	0.099535	0.854833	165	1	-1.2904	0.90108	0.90197	0.998362	650	0	-1.2904
Ppp1cb	5	0.092892	0.20811	0.897978	153	3	-0.32649	0.90216	0.90187	0.998362	651	0	-0.32649
Ywhae	6	0.71444	0.79508	0.994626	549	1	0.1325	0.90267	0.9066	0.998362	652	1	0.1325
Rcc2	5	0.16582	0.32258	0.971184	208	2	-0.052295	0.90314	0.90284	0.998362	653	0	-0.052295
Snrpd2	2	0.096141	0.16546	0.889058	161	2	-1.3329	0.90386	0.90305	0.998362	654	0	-1.3329
Cct4	1	0.091326	0.091618	0.811151	150	1	-2.2073	0.90867	0.90941	0.998362	655	0	-2.2073
Trim28	6	0.00067057	0.0036714	0.333183	5	5	-1.1877	0.90904	0.91148	0.998362	656	1	-1.1877
Stxbp1	6	0.64556	0.771	0.994626	516	1	0.14996	0.90929	0.91165	0.998362	657	1	0.14996
Psma7	4	0.047652	0.11426	0.857575	95	3	-0.86821	0.91222	0.91105	0.998362	658	0	-0.86821
Ddx23	6	0.84652	0.85998	0.994626	615	1	-0.35221	0.91407	0.91548	0.998362	659	1	-0.35221
Ubtf	3	0.61026	0.61772	0.994626	499	1	-0.30017	0.91672	0.91681	0.998362	660	0	-0.30017
NCsgRNA_58	1	0.082779	0.083284	0.811151	136	1	-1.3218	0.91722	0.91781	0.998362	661	0	-1.3218
Rbmx	6	0.17749	0.34865	0.971184	223	3	-0.25447	0.91745	0.91835	0.998362	662	1	-0.25447
Anp32e	6	0.047773	0.13666	0.874876	96	3	-0.63437	0.91933	0.91999	0.998362	663	1	-0.63437
Edf1	6	0.391	0.57495	0.994626	373	2	-0.20804	0.92026	0.92076	0.998362	664	1	-0.20804
Kdm2a	6	0.28085	0.48102	0.994626	308	2	0.047392	0.92095	0.92144	0.998362	665	1	0.047392
Rpl9	2	0.077689	0.1359	0.874876	132	2	-1.2601	0.92231	0.92207	0.998362	666	0	-1.2601
Snrnp70	6	0.30872	0.51521	0.994626	324	3	-0.45052	0.92232	0.9228	0.998362	667	1	-0.45052
Nkrf	6	0.99403	0.9937	0.999381	719	0	0.27717	0.92543	0.92569	0.998362	668	1	0.27717
Hnrnph3	6	0.7131	0.79468	0.994626	548	1	-0.1728	0.92586	0.92619	0.998362	669	1	-0.1728
Vdac2	6	0.21437	0.39631	0.979959	256	2	-0.19752	0.92673	0.92687	0.998362	670	1	-0.19752
Ddx5	5	0.73425	0.76751	0.994626	559	1	0.12016	0.9278	0.9283	0.998362	671	0	0.12016
Tasp1	6	0.19248	0.36849	0.972806	235	2	-0.2059	0.92801	0.92804	0.998362	672	0	-0.2059
Nono	6	0.29455	0.4972	0.994626	318	3	-0.34574	0.92822	0.92826	0.998362	673	0	-0.34574
2210016L21Rik	6	0.48827	0.64802	0.994626	430	2	-0.38063	0.93154	0.93187	0.998362	674	0	-0.38063
S100a16	6	0.24954	0.44128	0.994626	286	2	-0.14375	0.93414	0.93463	0.998362	675	0	-0.14375
Riox1	6	0.60537	0.73986	0.994626	496	1	-0.038676	0.93512	0.93566	0.998362	676	0	-0.038676
Sub1	6	0.2218	0.40589	0.979959	264	3	-0.47316	0.9357	0.93617	0.998362	677	0	-0.47316
Rps17	3	0.0068979	0.018427	0.530909	28	2	-4.0185	0.93609	0.93564	0.998362	678	0	-4.0185
Nlrc5	6	0.5147	0.66853	0.994626	446	2	-0.37571	0.93723	0.93753	0.998362	679	0	-0.37571
Hspa5	1	0.060462	0.061067	0.806082	112	1	-3.527	0.93954	0.93993	0.998362	680	0	-3.527
Hmgn1	6	0.5491	0.69525	0.994626	469	2	-0.25655	0.94001	0.94042	0.998362	681	0	-0.25655
Zfc3h1	5	0.26707	0.43594	0.994626	297	2	-0.35329	0.94085	0.94167	0.998362	682	0	-0.35329
Cdk2	5	0.42298	0.57671	0.994626	393	2	-0.089387	0.94134	0.94201	0.998362	683	0	-0.089387
B3gnt5	6	0.056141	0.15519	0.889058	107	4	-0.44569	0.94251	0.94301	0.998362	684	0	-0.44569
Ddx39b	5	0.27832	0.44586	0.994626	305	1	0.035221	0.94344	0.94393	0.998362	685	0	0.035221
Csnk1a1	6	0.59057	0.72778	0.994626	489	2	0.024481	0.9451	0.94554	0.998362	686	0	0.024481
Tmem127	6	0.02024	0.070887	0.811151	49	4	-0.8682	0.94694	0.94724	0.998362	687	0	-0.8682
Steep1	6	0.30479	0.50999	0.994626	323	2	-0.12217	0.94983	0.9503	0.998362	688	0	-0.12217
Spty2d1	6	0.049909	0.14175	0.878998	101	3	-0.83094	0.95014	0.9506	0.998362	689	0	-0.83094
Gtf2i	6	0.86716	0.87469	0.994626	625	1	-0.1664	0.95259	0.95266	0.998362	690	0	-0.1664
Mtrex	3	0.036482	0.088179	0.811151	80	2	-1.0212	0.95319	0.95291	0.998362	691	0	-1.0212
Cdk13	6	0.17435	0.3444	0.971184	218	3	-0.53593	0.9555	0.95519	0.998362	692	0	-0.53593
Rbm39	6	0.1774	0.34853	0.971184	222	3	-0.34577	0.95635	0.956	0.998362	693	0	-0.34577
Cdk1	1	0.043526	0.043765	0.756509	89	1	-4.3012	0.95647	0.95704	0.998362	694	0	-4.3012
Srsf5	6	0.075822	0.1961	0.895412	129	3	-0.57093	0.9569	0.95656	0.998362	695	0	-0.57093
Las1l	4	0.001898	0.0072686	0.351799	13	2	-0.64793	0.95724	0.95711	0.998362	696	0	-0.64793
Slc35a2	6	0.48233	0.64352	0.994626	425	2	-0.28589	0.96089	0.9606	0.998679	697	0	-0.28589
Eloa	6	0.50831	0.66394	0.994626	442	1	-0.057388	0.96114	0.96088	0.998679	698	0	-0.057388
Gnl2	3	0.03594	0.087366	0.811151	78	3	-0.80233	0.96406	0.96394	0.998679	699	0	-0.80233
Noc4l	5	0.49239	0.63971	0.994626	432	2	-0.26226	0.96415	0.96442	0.998679	700	0	-0.26226
Snw1	4	0.018689	0.054091	0.806082	45	3	-1.3682	0.96539	0.96554	0.998679	701	0	-1.3682
Tapbp	6	0.47038	0.63447	0.994626	423	2	-0.2166	0.96595	0.96583	0.998679	702	0	-0.2166
Ilf3	6	0.20476	0.38423	0.978857	248	3	-0.41861	0.96994	0.96979	0.998679	703	0	-0.41861
Rtcb	3	0.02981	0.073602	0.811151	66	3	-0.77415	0.97019	0.96977	0.998679	704	0	-0.77415
Rps28	3	0.02981	0.073602	0.811151	67	3	-1.1517	0.97019	0.96977	0.998679	705	0	-1.1517
Exosc4	3	0.020637	0.052822	0.806082	50	3	-0.7923	0.97936	0.97934	0.998855	706	0	-0.7923
Rrp1	4	0.26948	0.40239	0.979959	298	1	-0.4778	0.98289	0.98327	0.998855	707	0	-0.4778
3110082I17Rik	6	0.0073442	0.030159	0.653089	30	5	-0.74585	0.98432	0.98433	0.998855	708	0	-0.74585
Zfp106	6	0.40259	0.58351	0.994626	382	2	-0.36165	0.98437	0.9844	0.998855	709	0	-0.36165
Nip7	4	0.091511	0.19857	0.897978	151	3	-0.84976	0.98538	0.9858	0.998855	710	0	-0.84976
Mcm4	4	0.018128	0.052961	0.806082	43	3	-2.2819	0.9857	0.98613	0.998855	711	0	-2.2819
Nol7	5	0.0039407	0.016692	0.504946	19	3	-0.80487	0.98593	0.98586	0.998855	712	0	-0.80487
Alyref	3	0.013302	0.034539	0.679078	39	3	-1.7878	0.9867	0.98672	0.998855	713	0	-1.7878
Ddx41	5	0.0743	0.17666	0.889058	127	3	-0.77639	0.98799	0.98803	0.998855	714	0	-0.77639
Rpl37a	1	0.011713	0.01154	0.418885	38	1	-5.5428	0.98829	0.98839	0.998855	715	0	-5.5428
Cbx3	5	0.02981	0.088575	0.811151	65	4	-0.78117	0.98845	0.98847	0.998855	716	0	-0.78117
Ppib	5	0.096549	0.21424	0.897978	162	3	-0.83106	0.98972	0.98951	0.998855	717	0	-0.83106
Rpl13	2	0.0053241	0.010727	0.409883	25	2	-3.8299	0.99468	0.99446	0.998855	718	0	-3.8299
Snrpa1	2	0.0041091	0.0083487	0.378822	20	2	-3.9684	0.99589	0.99568	0.998855	719	0	-3.9684
Arpc3	5	0.0038954	0.016534	0.504946	18	5	-0.68739	0.9961	0.99629	0.998855	720	0	-0.68739
Rpl32	2	0.0023765	0.0048507	0.351233	16	2	-4.5723	0.99762	0.99771	0.998855	721	0	-4.5723
Cdc73	4	0.0017326	0.0067731	0.351233	12	4	-1.1743	0.99827	0.99844	0.998855	722	0	-1.1743
Utp18	4	0.0017005	0.0066344	0.351233	11	4	-2.3001	0.9983	0.99847	0.998855	723	0	-2.3001
Nipbl	5	0.0013493	0.0057524	0.351233	9	5	-0.94581	0.99865	0.99874	0.998855	724	0	-0.94581
Mcm6	2	0.0012683	0.0027003	0.333183	8	2	-5.6197	0.99873	0.99872	0.998855	725	0	-5.6197
Pcna	3	0.0011041	0.0030868	0.333183	6	3	-1.9727	0.9989	0.99886	0.998855	726	0	-1.9727

## Sheet: Table3
id	num	neg|score	neg|p-value	neg|fdr	neg|rank	neg|goodsgrna	neg|lfc	pos|score	pos|p-value	pos|fdr	pos|rank	pos|goodsgrna	pos|lfc
Macroh2a1	4	0.006907	0.017946	0.952974	9	2	-0.98918	0.00037139	0.0015182	0.317805	1	2	-0.98918
Ddx46	2	0.99093	0.99051	0.996151	621	0	10.845	0.00068764	0.0014391	0.317805	2	2	10.845
Coil	2	0.99926	0.99925	0.999253	628	0	10.537	0.00073802	0.0015083	0.317805	3	2	10.537
Cbx5	4	0.80678	0.80692	0.98434	509	0	9.3464	0.0041202	0.014761	0.839208	4	4	9.3464
Snrpa	4	0.3461	0.34669	0.952974	220	1	9.9936	0.0045004	0.016146	0.839208	5	3	9.9936
Tbl3	3	0.9932	0.9931	0.996151	626	0	9.6851	0.0051493	0.013673	0.839208	6	3	9.6851
Bud23	4	0.99424	0.99457	0.996151	627	0	9.3173	0.0057564	0.02028	0.839208	7	4	9.3173
Ddx31	2	0.10636	0.1109	0.952974	72	1	3.4682	0.0061802	0.012239	0.839208	8	1	3.4682
Kin	3	0.9929	0.99283	0.996151	625	0	9.5088	0.0071032	0.018925	0.839208	9	3	9.5088
Cpsf6	4	0.9928	0.99309	0.996151	624	0	9.6292	0.0071971	0.024949	0.839208	10	4	9.6292
Polr1d	3	0.83623	0.83758	0.986277	530	0	9.0444	0.0072041	0.019153	0.839208	11	3	9.0444
NCsgRNA_23	1	0.99278	0.9928	0.996151	623	0	10.901	0.0072215	0.0068788	0.839208	12	1	10.901
Pa2g4	4	0.99177	0.99231	0.996151	622	0	9.5701	0.0082345	0.028203	0.839208	13	4	9.5701
Supt16	2	0.31432	0.31294	0.952974	204	0	8.664	0.0089209	0.017333	0.839208	14	2	8.664
Psmc3ip	2	0.98885	0.98847	0.996151	620	0	9.9854	0.011145	0.021685	0.839208	15	2	9.9854
H1f5	3	0.29104	0.29	0.952974	182	1	6.4966	0.011305	0.029419	0.839208	16	2	6.4966
Lbhd1	4	0.3461	0.34669	0.952974	221	1	9.9025	0.013695	0.045056	0.839208	17	3	9.9025
Hnrnph1	3	0.13103	0.14509	0.952974	85	1	10.077	0.01616	0.041574	0.839208	18	2	10.077
Hspd1	3	0.98319	0.98317	0.996151	619	0	9.3936	0.016815	0.043335	0.839208	19	3	9.3936
Ubtf	2	0.88712	0.88585	0.996151	557	0	9.9503	0.01712	0.031674	0.839208	20	2	9.9503
Nom1	3	0.70263	0.7036	0.965938	453	0	8.5987	0.017436	0.044729	0.839208	21	3	8.5987
Exosc4	2	0.98098	0.98037	0.996151	617	0	10.321	0.018483	0.034186	0.839208	22	2	10.321
Ywhae	3	0.98136	0.98128	0.996151	618	0	9.4817	0.018637	0.047835	0.839208	23	3	9.4817
Anp32e	3	0.98085	0.98072	0.996151	616	0	9.9079	0.019149	0.04921	0.839208	24	3	9.9079
Nol6	3	0.82227	0.82283	0.986277	523	0	10.043	0.020418	0.052226	0.839208	25	3	10.043
Pds5a	2	0.97954	0.97908	0.996151	615	0	10.06	0.020464	0.037984	0.839208	26	2	10.06
Kri1	4	0.97846	0.97896	0.996151	614	0	9.2491	0.021536	0.067873	0.888005	27	4	9.2491
Mcm5	2	0.44777	0.44517	0.957444	293	0	9.1837	0.022567	0.041653	0.839208	28	2	9.1837
Steep1	2	0.97552	0.97472	0.996151	613	0	9.7437	0.024481	0.045214	0.839208	29	2	9.7437
Cenpb	5	0.97505	0.97492	0.996151	612	0	9.5682	0.024952	0.089543	0.9531	30	5	9.5682
Nop9	3	0.97467	0.97457	0.996151	611	0	9.417	0.025327	0.063373	0.873954	31	3	9.417
Uggt1	3	0.9744	0.97428	0.996151	610	0	9.201	0.025595	0.064016	0.873954	32	3	9.201
Csnk2b	2	0.97264	0.97176	0.996151	609	0	9.87	0.027359	0.05012	0.839208	33	2	9.87
Nudt16l1	2	0.97218	0.97131	0.996151	608	0	9.9067	0.027816	0.050733	0.839208	34	2	9.9067
Noc4l	2	0.58382	0.58154	0.965938	374	0	9.3984	0.027999	0.051	0.839208	35	2	9.3984
Ube2i	2	0.97103	0.97029	0.996151	607	0	9.6519	0.028975	0.052691	0.839208	36	2	9.6519
H2ac4	6	0.97098	0.97089	0.996151	606	0	8.5526	0.029015	0.1166	0.955127	37	6	8.5526
Ddx18	2	0.67649	0.67431	0.965938	438	0	9.5288	0.029355	0.053453	0.839208	38	2	9.5288
Rif1	3	0.92778	0.92762	0.996151	577	0	9.1896	0.02962	0.073234	0.915612	39	3	9.1896
Polr2e	2	0.96815	0.96752	0.996151	605	0	9.8193	0.031853	0.057973	0.873954	40	2	9.8193
NCsgRNA_39	1	0.96802	0.96855	0.996151	604	0	10.433	0.031981	0.03203	0.839208	41	1	10.433
Trmt1l	2	0.96691	0.96641	0.996151	603	0	9.8322	0.033092	0.060149	0.873954	42	2	9.8322
NCsgRNA_57	1	0.96596	0.96642	0.996151	602	0	10.373	0.034044	0.033959	0.839208	43	1	10.373
Gnl3l	3	0.9659	0.96565	0.996151	601	0	9.3844	0.0341	0.082986	0.939141	44	3	9.3844
Topbp1	3	0.96502	0.96471	0.996151	600	0	9.757	0.034975	0.085241	0.939141	45	3	9.757
Utp20	3	0.80753	0.80828	0.98434	512	0	8.9571	0.035674	0.086764	0.939441	46	3	8.9571
Rpp14	4	0.93594	0.93518	0.996151	583	0	9.6253	0.036229	0.10954	0.955127	47	4	9.6253
NCsgRNA_41	1	0.96252	0.96305	0.996151	599	0	10.341	0.037483	0.037589	0.839208	48	1	10.341
Ruvbl2	3	0.96114	0.96109	0.996151	598	0	9.133	0.038862	0.09434	0.955127	49	3	9.133
Mrrf	1	0.96045	0.96084	0.996151	597	0	10.31	0.039546	0.039487	0.839208	50	1	10.31
Ebna1bp2	2	0.062939	0.070177	0.952974	48	1	-0.89088	0.041513	0.074589	0.915612	51	1	-0.89088
Rpl24	2	0.95785	0.95759	0.996151	596	0	9.8278	0.042146	0.075815	0.915612	52	2	9.8278
Hmgn1	5	0.23957	0.27044	0.952974	145	1	9.5319	0.042274	0.14288	0.955127	53	4	9.5319
NCsgRNA_32	1	0.9577	0.9582	0.996151	595	0	10.278	0.042297	0.042366	0.839208	54	1	10.278
Wdr12	2	0.956	0.95561	0.996151	594	0	9.6687	0.044002	0.07898	0.918507	55	2	9.6687
Dnttip2	3	0.094839	0.11476	0.952974	67	1	9.8077	0.044218	0.1071	0.955127	56	2	9.8077
Anxa2	4	0.95558	0.95535	0.996151	593	0	9.5606	0.044417	0.13094	0.955127	57	4	9.5606
H1f2	6	0.79222	0.79171	0.98434	504	0	9.1448	0.044733	0.16739	0.955127	58	6	9.1448
Smarca4	1	0.95358	0.9539	0.996151	592	0	10.244	0.046424	0.046628	0.839208	59	1	10.244
Tra2b	2	0.95292	0.95246	0.996151	591	0	9.7958	0.047084	0.084242	0.939141	60	2	9.7958
Urb2	3	0.1102	0.12766	0.952974	74	1	8.5	0.047707	0.11436	0.955127	61	2	8.5
Adarb2	4	0.0037823	0.010449	0.825052	4	3	-2.2548	0.049931	0.14404	0.955127	62	1	-2.2548
Xrcc1	3	0.94906	0.949	0.996151	590	0	9.1825	0.050942	0.12141	0.955127	63	3	9.1825
Ppif	5	0.25056	0.27867	0.952974	156	1	7.9104	0.052177	0.17111	0.955127	64	4	7.9104
Sart3	1	0.94739	0.9476	0.996151	589	0	10.222	0.052613	0.05282	0.839208	65	1	10.222
Zfp326	5	0.79745	0.79787	0.98434	505	0	9.4622	0.055415	0.18	0.955127	66	5	9.4622
Wdr89	4	0.94282	0.94197	0.996151	588	0	8.7788	0.057177	0.16199	0.955127	67	4	8.7788
Trim28	4	0.83119	0.83151	0.986277	528	0	9.2916	0.057616	0.16295	0.955127	68	4	9.2916
Rrs1	3	0.087094	0.10793	0.952974	64	1	8.4914	0.05964	0.14063	0.955127	69	2	8.4914
Wdr75	3	0.93353	0.93315	0.996151	580	0	9.7044	0.059911	0.14122	0.955127	70	3	9.7044
Ercc2	2	0.93972	0.93899	0.996151	587	0	9.4036	0.060285	0.10687	0.955127	71	2	9.4036
Pdcd11	4	0.93971	0.93888	0.996151	586	0	8.8058	0.060295	0.16935	0.955127	72	4	8.8058
Utp3	3	0.87474	0.87589	0.99603	551	0	9.6883	0.061489	0.14454	0.955127	73	3	9.6883
Parn	1	0.93845	0.93871	0.996151	585	0	10.173	0.061554	0.062038	0.873954	74	1	10.173
Rrp15	1	0.93776	0.938	0.996151	584	0	10.156	0.062242	0.062651	0.873954	75	1	10.156
Ddx27	4	0.93559	0.93489	0.996151	582	0	9.1785	0.064413	0.17927	0.955127	76	4	9.1785
Rrp8	4	0.18973	0.21078	0.952974	115	1	8.5888	0.065716	0.18204	0.955127	77	3	8.5888
NCsgRNA_24	1	0.93363	0.93392	0.996151	581	0	10.134	0.066369	0.066914	0.888005	78	1	10.134
Rpl36a	2	0.90464	0.90392	0.996151	567	0	9.7426	0.068257	0.12053	0.955127	79	2	9.7426
Nol9	2	0.34417	0.34306	0.952974	218	0	8.5852	0.069585	0.12275	0.955127	80	2	8.5852
Rpl32	2	0.93007	0.92944	0.996151	579	0	9.6644	0.06993	0.12335	0.955127	81	2	9.6644
Nop56	2	0.92842	0.9278	0.996151	578	0	9.2954	0.071576	0.1261	0.955127	82	2	9.2954
Hnrnpr	2	0.14113	0.14321	0.952974	91	1	3.637	0.072236	0.12706	0.955127	83	1	3.637
NCsgRNA_50	1	0.92744	0.92789	0.996151	576	0	10.092	0.072558	0.072986	0.915612	84	1	10.092
Eif4a3	2	0.92732	0.9265	0.996151	575	0	9.6202	0.072685	0.12785	0.955127	85	2	9.6202
Dnmt1	4	0.3461	0.34669	0.952974	222	1	8.1903	0.076129	0.20701	0.955127	86	3	8.1903
Septin7	6	0.40493	0.41579	0.952974	264	1	9.2533	0.077818	0.26013	0.955127	87	5	9.2533
NCsgRNA_7	1	0.9216	0.92212	0.996151	574	0	10.07	0.078404	0.07897	0.918507	88	1	10.07
Shmt2	5	0.070809	0.1216	0.952974	53	2	8.9999	0.078571	0.23996	0.955127	89	3	8.9999
Septin11	6	0.91845	0.91877	0.996151	573	0	9.1291	0.081554	0.26995	0.955127	90	6	9.1291
Top1	5	0.91717	0.91782	0.996151	572	0	9.0723	0.082834	0.25072	0.955127	91	5	9.0723
Atr	3	0.36233	0.36157	0.952974	231	0	8.0565	0.083205	0.18982	0.955127	92	3	8.0565
Senp3	5	0.37275	0.38117	0.952974	244	1	9.3548	0.084256	0.25442	0.955127	93	4	9.3548
Atp5if1	4	0.18502	0.20683	0.952974	114	1	9.389	0.085071	0.22738	0.955127	94	3	9.389
Hdac2	4	0.49781	0.49613	0.965938	318	0	8.6385	0.086455	0.23054	0.955127	95	4	8.6385
Smc1a	3	0.38498	0.38382	0.952974	251	0	7.9934	0.089034	0.20089	0.955127	96	3	7.9934
Arpc1a	3	0.91025	0.91026	0.996151	571	0	9.496	0.089753	0.2024	0.955127	97	3	9.496
Dusp11	2	0.66425	0.66231	0.965938	427	0	9.2995	0.093314	0.16093	0.955127	98	2	9.2995
NCsgRNA_54	1	0.90578	0.90655	0.996151	569	0	9.9753	0.094223	0.094716	0.955127	99	1	9.9753
Rfc4	1	0.90578	0.90655	0.996151	570	0	9.9753	0.094223	0.094716	0.955127	100	1	9.9753
Tcof1	3	0.90562	0.90568	0.996151	568	0	9.3223	0.09438	0.21197	0.955127	101	3	9.3223
Arpc1b	5	0.81944	0.81991	0.986277	520	0	8.8807	0.095147	0.28152	0.955127	102	5	8.8807
Cdkn2b	4	0.90464	0.9036	0.996151	566	0	9.312	0.095365	0.2506	0.955127	103	4	9.312
Cbx1	3	0.84651	0.84772	0.986277	536	0	9.4867	0.095371	0.21372	0.955127	104	3	9.4867
Apex1	4	0.26671	0.27404	0.952974	164	1	7.9574	0.096695	0.25309	0.955127	105	3	7.9574
Ddx47	2	0.21713	0.2172	0.952974	134	1	5.0445	0.097239	0.16742	0.955127	106	1	5.0445
Rbis	2	0.86079	0.85907	0.986277	548	0	9.5807	0.099198	0.17045	0.955127	107	2	9.5807
Cdk7	1	0.89993	0.90088	0.996151	565	0	9.9563	0.10007	0.10072	0.955127	108	1	9.9563
Cbx3	3	0.89973	0.89996	0.996151	564	0	8.7157	0.10027	0.22358	0.955127	109	3	8.7157
Chd3	6	0.31092	0.34239	0.952974	202	1	8.3387	0.10112	0.31843	0.955127	110	5	8.3387
NCsgRNA_33	1	0.89856	0.89953	0.996151	563	0	9.949	0.10144	0.10215	0.955127	111	1	9.949
Pum3	4	0.1269	0.16108	0.952974	84	1	8.1759	0.10178	0.26395	0.955127	112	3	8.1759
Srp72	4	0.8981	0.89724	0.996151	562	0	9.3679	0.1019	0.26423	0.955127	113	4	9.3679
Rpl13	1	0.89787	0.89885	0.996151	561	0	9.9485	0.10213	0.10274	0.955127	114	1	9.9485
Eloa	3	0.67419	0.674	0.965938	434	0	9.4651	0.10314	0.22868	0.955127	115	3	9.4651
NCsgRNA_29	1	0.89649	0.8975	0.996151	560	0	9.9412	0.10351	0.10406	0.955127	116	1	9.9412
Gtf2f1	4	0.49452	0.49283	0.965938	315	0	8.6776	0.10685	0.2742	0.955127	117	4	8.6776
Bysl	2	0.89079	0.88958	0.996151	559	0	9.477	0.10921	0.18568	0.955127	118	2	9.477
Api5	3	0.89079	0.89159	0.996151	558	0	8.7965	0.10921	0.23988	0.955127	119	3	8.7965
Fam136a	3	0.10254	0.12163	0.952974	70	1	6.2216	0.1102	0.24157	0.955127	120	2	6.2216
Hadh	5	0.53134	0.53245	0.965938	337	0	8.9194	0.11247	0.32042	0.955127	121	5	8.9194
Zfp207	1	0.88686	0.88779	0.996151	556	0	9.9004	0.11314	0.11364	0.955127	122	1	9.9004
Kpna3	4	0.70945	0.70916	0.965938	457	0	8.7756	0.11441	0.28934	0.955127	123	4	8.7756
H2ax	3	0.88528	0.88654	0.996151	555	0	9.2346	0.11472	0.24945	0.955127	124	3	9.2346
Nepro	2	0.70554	0.70384	0.965938	454	0	9.3329	0.1148	0.19398	0.955127	125	2	9.3329
Rps16	1	0.8848	0.88543	0.996151	554	0	9.8875	0.1152	0.11576	0.955127	126	1	9.8875
Trmt6	3	0.41434	0.41325	0.952974	271	0	8.8708	0.11591	0.25171	0.955127	127	3	8.8708
Septin2	5	0.10373	0.1709	0.952974	71	1	9.0009	0.11931	0.33516	0.955127	128	4	9.0009
Rpl29	3	0.17897	0.18612	0.952974	112	1	9.0405	0.11971	0.25855	0.955127	129	2	9.0405
Spty2d1	2	0.87817	0.87708	0.99603	553	0	9.5207	0.12183	0.20418	0.955127	130	2	9.5207
Rps7	3	0.22163	0.22457	0.952974	137	1	9.3958	0.12222	0.2631	0.955127	131	2	9.3958
Mroh8	1	0.87586	0.87646	0.99603	552	0	9.8276	0.12414	0.12493	0.955127	132	1	9.8276
Rpp25	4	0.67242	0.67233	0.965938	433	0	8.8805	0.12441	0.30912	0.955127	133	4	8.8805
Srp14	2	0.67454	0.67246	0.965938	436	0	9.2965	0.12576	0.21032	0.955127	134	2	9.2965
Ppp1cb	3	0.29595	0.29489	0.952974	187	1	8.8069	0.12915	0.27569	0.955127	135	2	8.8069
Dkc1	3	0.077351	0.099423	0.952974	59	1	8.1354	0.13103	0.27912	0.955127	136	2	8.1354
Zcrb1	3	0.43009	0.42902	0.957444	277	0	9.3712	0.13115	0.27931	0.955127	137	3	9.3712
Nmd3	3	0.77868	0.77988	0.98434	491	0	9.3712	0.13115	0.27931	0.955127	138	3	9.3712
Luc7l2	2	0.86587	0.86439	0.988771	550	0	9.1676	0.13413	0.2224	0.955127	139	2	9.1676
Pwp1	1	0.86554	0.8665	0.98939	549	0	9.7887	0.13446	0.13494	0.955127	140	1	9.7887
Mlkl	3	0.37221	0.37113	0.952974	241	0	8.6236	0.13478	0.28574	0.955127	141	3	8.6236
Snrpc	3	0.45936	0.45854	0.959886	300	0	9.3359	0.1381	0.29154	0.955127	142	3	9.3359
Exosc7	2	0.45134	0.44903	0.957728	295	0	8.8121	0.13858	0.22881	0.955127	143	2	8.8121
Wrn	3	0.85999	0.861	0.986688	547	0	8.8353	0.14001	0.29496	0.955127	144	3	8.8353
Xrn2	3	0.15338	0.16439	0.952974	95	1	8.5827	0.14039	0.29556	0.955127	145	2	8.5827
H2bc18	3	0.63142	0.63067	0.965938	404	0	9.3271	0.14106	0.29659	0.955127	146	3	9.3271
Bub3	2	0.19136	0.19183	0.952974	117	1	4.615	0.14113	0.23247	0.955127	147	1	4.615
Rpl19	1	0.85798	0.85892	0.986277	546	0	9.736	0.14202	0.14256	0.955127	148	1	9.736
Hnrnpa0	3	0.85691	0.85786	0.986277	545	0	9.0453	0.14309	0.29999	0.955127	149	3	9.0453
Kdm3b	3	0.21462	0.21814	0.952974	133	1	9.3783	0.1433	0.30035	0.955127	150	2	9.3783
Hnrnpk	2	0.85665	0.85484	0.986277	544	0	9.1575	0.14335	0.23542	0.955127	151	2	9.1575
Hnrnph3	2	0.41983	0.41839	0.955449	275	0	8.725	0.14368	0.23592	0.955127	152	2	8.725
Ddx52	2	0.85613	0.85425	0.986277	543	0	9.4279	0.14387	0.23619	0.955127	153	2	9.4279
Arpc4	4	0.85547	0.8558	0.986277	542	0	8.8414	0.14453	0.34912	0.955127	154	4	8.8414
Eif2ak2	3	0.46481	0.46365	0.96114	302	0	8.8521	0.14504	0.30316	0.955127	155	3	8.8521
Nol10	1	0.85316	0.85381	0.986277	541	0	9.7111	0.14684	0.14711	0.955127	156	1	9.7111
Rbmx	3	0.85206	0.85291	0.986277	540	0	9.3021	0.14794	0.30789	0.955127	157	3	9.3021
Rbm8a	2	0.85193	0.84989	0.986277	539	0	9.2886	0.14807	0.24291	0.955127	158	2	9.2886
Sbds	1	0.85179	0.85231	0.986277	538	0	9.7056	0.14821	0.14844	0.955127	159	1	9.7056
Ngdn	2	0.84927	0.84741	0.986277	537	0	9.298	0.15073	0.24672	0.955127	160	2	9.298
Dync1h1	3	0.19871	0.20346	0.952974	127	1	7.9566	0.15523	0.31956	0.955127	161	2	7.9566
Cdk1	1	0.84422	0.84494	0.986277	535	0	9.6701	0.15578	0.15523	0.955127	162	1	9.6701
Pelo	2	0.2977	0.29673	0.952974	189	0	7.988	0.15636	0.25501	0.955127	163	2	7.988
Srp19	3	0.84293	0.84426	0.986277	534	0	8.8103	0.15707	0.32259	0.955127	164	3	8.8103
Ppan	1	0.84216	0.84302	0.986277	533	0	9.6619	0.15784	0.15753	0.955127	165	1	9.6619
Hnrnpdl	4	0.83937	0.83969	0.986277	532	0	8.9016	0.16063	0.37844	0.955127	166	4	8.9016
Traf3	4	0.26453	0.27221	0.952974	162	1	8.5955	0.16117	0.37937	0.955127	167	3	8.5955
Pqbp1	4	0.83726	0.83756	0.986277	531	0	8.7355	0.16274	0.38218	0.955127	168	4	8.7355
S100a16	4	0.71217	0.71194	0.965938	461	0	8.9155	0.16598	0.38803	0.955127	169	4	8.9155
Zfp638	3	0.83281	0.83402	0.986277	529	0	8.7424	0.16719	0.33956	0.955127	170	3	8.7424
Recql	5	0.1827	0.2274	0.952974	113	1	9.1394	0.16794	0.43392	0.955127	171	4	9.1394
Mdn1	3	0.62394	0.62359	0.965938	401	0	8.816	0.16989	0.34403	0.955127	172	3	8.816
Plrg1	2	0.82886	0.827	0.986277	527	0	9.317	0.17114	0.27527	0.955127	173	2	9.317
Baz1b	1	0.82875	0.82946	0.986277	526	0	9.5923	0.17125	0.17109	0.955127	174	1	9.5923
Nlrc5	5	0.54889	0.55022	0.965938	353	0	8.263	0.17295	0.4429	0.955127	175	5	8.263
Ddx21	2	0.65905	0.65713	0.965938	424	0	9.1777	0.1752	0.28149	0.955127	176	2	9.1777
Mki67	3	0.82454	0.82545	0.986277	525	0	8.8587	0.17546	0.35326	0.955127	177	3	8.8587
Wdr36	1	0.82359	0.82462	0.986277	524	0	9.5374	0.17641	0.17628	0.955127	178	1	9.5374
NCsgRNA_27	1	0.82084	0.82193	0.986277	522	0	9.5291	0.17916	0.17885	0.955127	179	1	9.5291
Ddx39a	4	0.57714	0.57678	0.965938	369	0	8.9025	0.17991	0.41331	0.955127	180	4	8.9025
Stub1	3	0.40344	0.40241	0.952974	263	0	9.2423	0.18008	0.36096	0.955127	181	3	9.2423
Tasp1	4	0.63261	0.63216	0.965938	406	0	8.0431	0.18029	0.41384	0.955127	182	4	8.0431
Ugcg	1	0.81946	0.82058	0.986277	521	0	9.5221	0.18054	0.17999	0.955127	183	1	9.5221
Eif4a1	2	0.81935	0.81679	0.986277	519	0	8.868	0.18065	0.28922	0.955127	184	2	8.868
B2m	3	0.33441	0.33338	0.952974	214	0	9.2321	0.18335	0.36624	0.955127	185	3	9.2321
NCsgRNA_4	1	0.81465	0.81588	0.986277	518	0	9.5003	0.18535	0.18465	0.955127	186	1	9.5003
H2ac18	2	0.81315	0.81036	0.98434	517	0	9.0889	0.18685	0.29762	0.955127	187	2	9.0889
Tubb4b	2	0.81196	0.80928	0.98434	516	0	9.3091	0.18804	0.29915	0.955127	188	2	9.3091
Ilf2	2	0.81137	0.80872	0.98434	515	0	8.9047	0.18863	0.29989	0.955127	189	2	8.9047
Rbmy	3	0.68816	0.68898	0.965938	445	0	8.8375	0.18978	0.3764	0.955127	190	3	8.8375
Nifk	4	0.80957	0.80987	0.98434	514	0	8.6796	0.19043	0.43164	0.955127	191	4	8.6796
Smchd1	3	0.63932	0.63877	0.965938	408	0	9.2045	0.19078	0.37765	0.955127	192	3	9.2045
NCsgRNA_8	1	0.80846	0.81013	0.98434	513	0	9.4853	0.19154	0.19105	0.955127	193	1	9.4853
Ccdc59	3	0.62071	0.62079	0.965938	398	0	8.5611	0.19246	0.38022	0.955127	194	3	8.5611
Hnrnpa2b1	3	0.80753	0.80828	0.98434	511	0	8.6911	0.19247	0.38024	0.955127	195	3	8.6911
Urb1	2	0.80746	0.80475	0.98434	510	0	9.0237	0.19254	0.30485	0.955127	196	2	9.0237
Got2	4	0.0041202	0.01128	0.825052	5	1	8.2276	0.19328	0.43613	0.955127	197	3	8.2276
NCsgRNA_9	1	0.80158	0.80363	0.98434	508	0	9.468	0.19842	0.1979	0.955127	198	1	9.468
Eif5a2	2	0.79954	0.79671	0.98434	507	0	8.9867	0.20046	0.31618	0.955127	199	2	8.9867
Atrip	1	0.79883	0.80077	0.98434	506	0	9.4585	0.20117	0.20085	0.955127	200	1	9.4585
Cdkn2aip	2	0.79177	0.7888	0.98434	503	0	8.9832	0.20823	0.32668	0.955127	201	2	8.9832
Med10	4	0.15875	0.18516	0.952974	102	1	7.8165	0.20836	0.46074	0.955127	202	3	7.8165
Spats2l	3	0.79163	0.79285	0.98434	502	0	8.3863	0.20837	0.40412	0.955127	203	3	8.3863
Srsf5	2	0.78862	0.78569	0.98434	501	0	9.1058	0.21138	0.331	0.955127	204	2	9.1058
Hnrnpf	1	0.78851	0.79032	0.98434	500	0	9.4155	0.21149	0.21099	0.955127	205	1	9.4155
Ppih	3	0.78835	0.78953	0.98434	499	0	8.9236	0.21165	0.40931	0.955127	206	3	8.9236
Nono	3	0.019473	0.035482	0.952974	16	1	9.1566	0.21194	0.40987	0.955127	207	2	9.1566
Tap1	3	0.38349	0.38228	0.952974	249	0	8.3724	0.21286	0.41123	0.955127	208	3	8.3724
Polr1a	3	0.4511	0.45069	0.957728	294	0	9.1512	0.21323	0.4118	0.955127	209	3	9.1512
Srfbp1	2	0.78671	0.78361	0.98434	498	0	9.0666	0.21329	0.33376	0.955127	210	2	9.0666
Eftud2	3	0.78652	0.78773	0.98434	497	0	8.9989	0.21348	0.41229	0.955127	211	3	8.9989
Ssb	1	0.78645	0.78829	0.98434	496	0	9.411	0.21355	0.213	0.955127	212	1	9.411
Serbp1	2	0.78608	0.78303	0.98434	495	0	8.9304	0.21392	0.3346	0.955127	213	2	8.9304
Ctnnbl1	3	0.40052	0.39913	0.952974	261	0	7.2197	0.21462	0.41411	0.955127	214	3	7.2197
Srsf7	1	0.78508	0.787	0.98434	494	0	9.4035	0.21492	0.21438	0.955127	215	1	9.4035
Serpinh1	4	0.15391	0.18146	0.952974	96	1	8.887	0.21658	0.47453	0.964411	216	3	8.887
Pes1	2	0.78128	0.77873	0.98434	493	0	8.7373	0.21872	0.34099	0.955127	217	2	8.7373
H2bc1	3	0.78094	0.78226	0.98434	492	0	9.0079	0.21906	0.42068	0.955127	218	3	9.0079
Xrcc5	6	0.54855	0.54879	0.965938	352	0	8.7202	0.22004	0.55378	0.967866	219	6	8.7202
NCsgRNA_1	1	0.77682	0.77888	0.98434	490	0	9.3882	0.22318	0.2227	0.955127	220	1	9.3882
Adar	2	0.77675	0.77393	0.98434	489	0	8.7947	0.22325	0.34718	0.955127	221	2	8.7947
Dhx9	3	0.02841	0.050238	0.952974	22	2	-0.85774	0.22337	0.42744	0.955127	222	1	-0.85774
Hnrnpa1	2	0.77578	0.77299	0.98434	488	0	8.9055	0.22422	0.34852	0.955127	223	2	8.9055
Rpl10a	1	0.77407	0.77585	0.98434	487	0	9.372	0.22593	0.22554	0.955127	224	1	9.372
Lmnb1	2	0.52462	0.52149	0.965938	332	0	8.8615	0.22683	0.35216	0.955127	225	2	8.8615
Utp25	4	0.64542	0.64556	0.965938	411	0	8.8889	0.22896	0.49362	0.967866	226	4	8.8889
Smndc1	1	0.77063	0.7724	0.98434	486	0	9.3681	0.22937	0.22923	0.955127	227	1	9.3681
susd6	3	0.59133	0.59043	0.965938	378	0	8.8763	0.23032	0.43794	0.955127	228	3	8.8763
Ccdc86	2	0.76955	0.76664	0.98434	485	0	9.0612	0.23045	0.35694	0.955127	229	2	9.0612
Rexo4	3	0.7695	0.77051	0.98434	484	0	9.0847	0.2305	0.43813	0.955127	230	3	9.0847
Hsd17b4	5	0.13173	0.19198	0.952974	86	1	8.666	0.2344	0.54664	0.967866	231	4	8.666
Prdx1	2	0.7639	0.76118	0.98434	483	0	8.7741	0.2361	0.36441	0.955127	232	2	8.7741
Rsl1d1	2	0.45693	0.45447	0.957741	298	0	8.6818	0.23648	0.36498	0.955127	233	2	8.6818
Vim	2	0.76223	0.75945	0.98434	482	0	8.6662	0.23777	0.36652	0.955127	234	2	8.6662
Lrp10	4	0.44231	0.44049	0.957444	287	0	8.0312	0.24243	0.51435	0.967866	235	4	8.0312
Rpp38	3	0.75606	0.75674	0.98434	481	0	8.5392	0.24394	0.45755	0.955127	236	3	8.5392
Tpr	3	0.24067	0.24179	0.952974	148	1	7.9649	0.2441	0.4578	0.955127	237	2	7.9649
Srpk1	1	0.75585	0.75734	0.98434	480	0	9.3135	0.24415	0.24417	0.955127	238	1	9.3135
Blm	2	0.75547	0.75282	0.98434	479	0	8.707	0.24453	0.37578	0.955127	239	2	8.707
H3f4	4	0.43068	0.42848	0.957444	279	0	8.8293	0.24536	0.51839	0.967866	240	4	8.8293
Ddx55	1	0.75447	0.756	0.98434	478	0	9.3118	0.24553	0.2455	0.955127	241	1	9.3118
Cct7	3	0.75201	0.75267	0.98434	477	0	8.6275	0.24799	0.46374	0.955127	242	3	8.6275
Elavl1	4	0.75158	0.75183	0.98434	476	0	8.4117	0.24842	0.52319	0.967866	243	4	8.4117
Rbm39	2	0.74862	0.74613	0.98434	475	0	8.9488	0.25138	0.38476	0.955127	244	2	8.9488
Knop1	4	0.16838	0.19296	0.952974	105	1	8.8532	0.25709	0.53546	0.967866	245	3	8.8532
Zfp106	2	0.21347	0.21371	0.952974	131	1	4.3962	0.25796	0.39321	0.955127	246	1	4.3962
Tapbp	1	0.74175	0.74335	0.98434	474	0	9.2766	0.25825	0.25845	0.955127	247	1	9.2766
Rtf2	2	0.4093	0.40787	0.952974	267	0	8.5287	0.26151	0.39776	0.955127	248	2	8.5287
Rpl22	3	0.31054	0.30948	0.952974	201	1	7.9974	0.26446	0.48717	0.967866	249	2	7.9974
Hnrnpl	2	0.73499	0.73274	0.974348	473	0	8.9951	0.26501	0.4023	0.955127	250	2	8.9951
Riox1	3	0.073435	0.096071	0.952974	57	1	9.0159	0.26555	0.48858	0.967866	251	2	9.0159
Rfc1	4	0.73421	0.73386	0.974348	472	0	8.6885	0.26579	0.54791	0.967866	252	4	8.6885
Vrk1	2	0.31147	0.31031	0.952974	203	0	7.976	0.26976	0.40826	0.955127	253	2	7.976
Mtrex	4	0.72959	0.72918	0.972234	471	0	8.4252	0.27041	0.55403	0.967866	254	4	8.4252
D8Ertd738e	4	0.052576	0.091145	0.952974	39	1	8.6895	0.27582	0.56173	0.96914	255	3	8.6895
Mrpl12	1	0.7218	0.7229	0.965938	470	0	9.2105	0.2782	0.27865	0.955127	256	1	9.2105
Kdm2a	3	0.72152	0.72292	0.965938	469	0	8.49	0.27848	0.50588	0.967866	257	3	8.49
Rpl23	1	0.72111	0.72212	0.965938	468	0	9.2071	0.27889	0.27936	0.955127	258	1	9.2071
Wdr74	3	0.71799	0.71947	0.965938	467	0	8.7942	0.28201	0.51071	0.967866	259	3	8.7942
Ddx39b	3	0.02354	0.042207	0.952974	18	1	7.6743	0.2828	0.51199	0.967866	260	2	7.6743
2210016L21Rik	3	0.7171	0.71868	0.965938	466	0	8.4698	0.2829	0.51214	0.967866	261	3	8.4698
Zcchc9	3	0.71621	0.71777	0.965938	465	0	8.36	0.28379	0.51334	0.967866	262	3	8.36
Fen1	2	0.57131	0.56975	0.965938	365	0	8.8677	0.2838	0.42514	0.955127	263	2	8.8677
NCsgRNA_17	1	0.71424	0.71534	0.965938	464	0	9.1878	0.28576	0.28593	0.955127	264	1	9.1878
Ezh2	3	0.079305	0.10112	0.952974	61	1	7.512	0.2861	0.51631	0.967866	265	2	7.512
Srsf1	1	0.71355	0.71464	0.965938	463	0	9.1869	0.28645	0.28675	0.955127	266	1	9.1869
Rbm27	5	0.5984	0.59983	0.965938	382	0	8.4538	0.28682	0.62245	0.979028	267	5	8.4538
Ddx54	1	0.71217	0.71303	0.965938	462	0	9.1799	0.28783	0.2881	0.955127	268	1	9.1799
Srsf6	2	0.71185	0.70982	0.965938	460	0	8.9691	0.28815	0.43034	0.955127	269	2	8.9691
Srsf2	1	0.71149	0.71238	0.965938	459	0	9.179	0.28851	0.28882	0.955127	270	1	9.179
Psma7	1	0.71045	0.71119	0.965938	458	0	9.1781	0.28955	0.28985	0.955127	271	1	9.1781
Rps9	1	0.70942	0.71012	0.965938	456	0	9.1736	0.29058	0.29086	0.955127	272	1	9.1736
Cdk9	2	0.70889	0.70692	0.965938	455	0	8.6313	0.29111	0.43392	0.955127	273	2	8.6313
Rpl35	2	0.6469	0.645	0.965938	413	0	8.9862	0.29193	0.43497	0.955127	274	2	8.9862
2810004N23Rik	3	0.70263	0.7036	0.965938	452	0	8.0312	0.29737	0.53108	0.967866	275	3	8.0312
Xrcc6	2	0.029355	0.039418	0.952974	24	1	-2.5929	0.2977	0.44196	0.955127	276	1	-2.5929
Smc2	2	0.025285	0.035838	0.952974	20	1	-1.9197	0.3	0.4449	0.955127	277	1	-1.9197
Mre11a	2	0.69992	0.69821	0.965938	451	0	8.4669	0.30008	0.44505	0.955127	278	2	8.4669
Rbx1	1	0.69773	0.69856	0.965938	450	0	9.1422	0.30227	0.30265	0.955127	279	1	9.1422
Chd4	2	0.69538	0.69347	0.965938	449	0	8.7287	0.30462	0.45051	0.955127	280	2	8.7287
Smarca5	3	0.13852	0.15133	0.952974	89	1	8.9457	0.30509	0.5416	0.967866	281	2	8.9457
Khdrbs1	2	0.69462	0.69268	0.965938	448	0	8.8533	0.30538	0.45151	0.955127	282	2	8.8533
Ncaph2	1	0.69429	0.69506	0.965938	447	0	9.1312	0.30571	0.30585	0.955127	283	1	9.1312
Csnk2a2	3	0.44136	0.44082	0.957444	286	0	8.9436	0.30605	0.54283	0.967866	284	3	8.9436
Tspyl1	4	0.3756	0.37411	0.952974	245	1	8.0278	0.30726	0.60401	0.979028	285	3	8.0278
Vdac2	2	0.34584	0.34476	0.952974	219	0	8.2079	0.30804	0.45472	0.955127	286	2	8.2079
Rrp7a	4	0.54144	0.54016	0.965938	347	0	7.9982	0.30934	0.60645	0.979028	287	4	7.9982
Npm3	4	0.6905	0.69008	0.965938	446	0	8.2154	0.3095	0.60664	0.979028	288	4	8.2154
Mdh2	4	0.59279	0.59251	0.965938	379	0	8.7912	0.30993	0.60709	0.979028	289	4	8.7912
Bop1	2	0.53453	0.53155	0.965938	339	0	8.7578	0.31318	0.46099	0.955127	290	2	8.7578
Fcf1	1	0.68673	0.688	0.965938	444	0	9.0969	0.31327	0.31351	0.955127	291	1	9.0969
Mak16	2	0.68658	0.68432	0.965938	443	0	8.4515	0.31342	0.46115	0.955127	292	2	8.4515
Gcn1	1	0.68569	0.68706	0.965938	442	0	9.0932	0.31431	0.3145	0.955127	293	1	9.0932
NCsgRNA_5	1	0.68398	0.68545	0.965938	441	0	9.0884	0.31602	0.31611	0.955127	294	1	9.0884
Tcea1	3	0.42653	0.42563	0.957444	276	0	8.9194	0.31955	0.55985	0.96914	295	3	8.9194
Heatr1	1	0.67847	0.68002	0.965938	440	0	9.0799	0.32153	0.32172	0.955127	296	1	9.0799
Utp15	2	0.67845	0.67623	0.965938	439	0	8.556	0.32155	0.47118	0.962783	297	2	8.556
NCsgRNA_22	1	0.67641	0.678	0.965938	437	0	9.0694	0.32359	0.32376	0.955127	298	1	9.0694
NCsgRNA_48	1	0.67435	0.67621	0.965938	435	0	9.0502	0.32565	0.32576	0.955127	299	1	9.0502
Sarnp	2	0.37824	0.37671	0.952974	246	0	8.3167	0.32735	0.47839	0.967217	300	2	8.3167
Gtf2i	2	0.67218	0.67014	0.965938	432	0	8.4083	0.32782	0.47899	0.967217	301	2	8.4083
Sumo1	1	0.67056	0.67268	0.965938	431	0	9.0405	0.32944	0.32942	0.955127	302	1	9.0405
Dnajc8	1	0.66609	0.66823	0.965938	430	0	9.0317	0.33391	0.33398	0.955127	303	1	9.0317
Vdac1	3	0.66483	0.66451	0.965938	429	0	8.5719	0.33517	0.58	0.979028	304	3	8.5719
NCsgRNA_36	1	0.66472	0.66687	0.965938	428	0	9.0297	0.33528	0.33542	0.955127	305	1	9.0297
Actr2	1	0.66059	0.66291	0.965938	426	0	9.0139	0.33941	0.33965	0.955127	306	1	9.0139
Zmat2	4	0.65974	0.65958	0.965938	425	0	8.3088	0.34026	0.6453	0.979028	307	4	8.3088
Rack1	1	0.65853	0.66107	0.965938	423	0	9.0019	0.34147	0.34194	0.955127	308	1	9.0019
Arl6ip4	3	0.14039	0.15309	0.952974	90	1	8.4152	0.34381	0.59052	0.979028	309	2	8.4152
Isg20l2	2	0.65583	0.65404	0.965938	422	0	8.7449	0.34417	0.49841	0.967866	310	2	8.7449
Rpl18	2	0.4344	0.43275	0.957444	282	0	8.4925	0.34417	0.49841	0.967866	311	2	8.4925
Tap2	3	0.65528	0.65439	0.965938	421	0	8.1058	0.34472	0.59172	0.979028	312	3	8.1058
Edf1	4	0.65419	0.65401	0.965938	420	0	8.1256	0.34581	0.65189	0.979028	313	4	8.1256
H4c1	1	0.65234	0.65507	0.965938	419	0	8.9979	0.34766	0.34814	0.955127	314	1	8.9979
Pinx1	2	0.65179	0.65012	0.965938	418	0	8.652	0.34821	0.50284	0.967866	315	2	8.652
Ddx24	3	0.23032	0.23233	0.952974	139	1	7.1635	0.34847	0.59596	0.979028	316	2	7.1635
Tufm	1	0.64856	0.65146	0.965938	416	0	8.9898	0.35144	0.35218	0.955127	317	1	8.9898
Rcc2	1	0.64856	0.65146	0.965938	417	0	8.9898	0.35144	0.35218	0.955127	318	1	8.9898
Rrp1b	5	0.64722	0.6478	0.965938	415	0	8.2067	0.35278	0.70384	0.979028	319	5	8.2067
Hnrnpu	2	0.6469	0.645	0.965938	414	0	8.4956	0.3531	0.50839	0.967866	320	2	8.4956
Skp1	1	0.64615	0.64886	0.965938	412	0	8.9848	0.35385	0.35449	0.955127	321	1	8.9848
NCsgRNA_46	1	0.64443	0.64708	0.965938	410	0	8.9807	0.35557	0.35606	0.955127	322	1	8.9807
Rpl23a	1	0.6434	0.64589	0.965938	409	0	8.9797	0.3566	0.35692	0.955127	323	1	8.9797
Fanci	1	0.63858	0.64106	0.965938	407	0	8.9695	0.36142	0.36149	0.955127	324	1	8.9695
Rpl37	2	0.56043	0.55867	0.965938	360	0	8.7196	0.36626	0.52313	0.967866	325	2	8.7196
NCsgRNA_62	1	0.63171	0.63409	0.965938	405	0	8.9415	0.36829	0.36857	0.955127	326	1	8.9415
Pdcd6	5	0.36083	0.37084	0.952974	230	1	8.5405	0.37299	0.72636	0.979028	327	4	8.5405
Cycs	2	0.62659	0.62475	0.965938	403	0	8.3098	0.37341	0.53144	0.967866	328	2	8.3098
Rrp9	1	0.6262	0.62826	0.965938	402	0	8.931	0.3738	0.37408	0.955127	329	1	8.931
Sppl3	5	0.3389	0.35165	0.952974	216	1	8.5665	0.37512	0.72854	0.979028	330	4	8.5665
Rps10	2	0.62322	0.62115	0.965938	400	0	8.3508	0.37678	0.53527	0.967866	331	2	8.3508
Otud4	4	0.62278	0.62268	0.965938	399	0	8.3842	0.37722	0.68735	0.979028	332	4	8.3842
Utp11	2	0.62068	0.61862	0.965938	397	0	8.4971	0.37932	0.5382	0.967866	333	2	8.4971
Stxbp1	5	0.02889	0.057211	0.952974	23	1	8.224	0.37983	0.7336	0.979028	334	4	8.224
Sub1	2	0.61771	0.6156	0.965938	396	0	8.2315	0.38229	0.54145	0.967866	335	2	8.2315
Pspc1	3	0.61746	0.61765	0.965938	395	0	8.6327	0.38254	0.63492	0.979028	336	3	8.6327
Fam133b	1	0.61692	0.61867	0.965938	394	0	8.9109	0.38308	0.38351	0.955127	337	1	8.9109
Tent4b	4	0.61477	0.6145	0.965938	393	0	8.4079	0.38523	0.69653	0.979028	338	4	8.4079
Rnf40	1	0.61382	0.6154	0.965938	392	0	8.8991	0.38618	0.38672	0.955127	339	1	8.8991
Sltm	2	0.61174	0.60981	0.965938	391	0	8.4937	0.38826	0.5484	0.967866	340	2	8.4937
Zfp622	4	0.19442	0.21439	0.952974	124	1	8.6693	0.38901	0.70066	0.979028	341	3	8.6693
Rbm19	3	0.60869	0.60864	0.965938	390	0	8.1077	0.39131	0.64476	0.979028	342	3	8.1077
2310033P09Rik	2	0.60787	0.60623	0.965938	389	0	8.5715	0.39213	0.5529	0.967866	343	2	8.5715
NCsgRNA_44	1	0.60763	0.60921	0.965938	388	0	8.9453	0.39237	0.3928	0.955127	344	1	8.9453
Rpl27a	2	0.60701	0.60526	0.965938	387	0	8.3187	0.39299	0.554	0.967866	345	2	8.3187
Gtf2h2	1	0.60626	0.60775	0.965938	386	0	8.885	0.39374	0.39402	0.955127	346	1	8.885
Hspa9	1	0.60557	0.60723	0.965938	385	0	8.8829	0.39443	0.39474	0.955127	347	1	8.8829
Mcm3	3	0.18978	0.19566	0.952974	116	1	8.7873	0.39698	0.65073	0.979028	348	2	8.7873
H1f4	1	0.60213	0.60359	0.965938	384	0	8.8763	0.39787	0.39829	0.955127	349	1	8.8763
Eef1a2	5	0.033437	0.064214	0.952974	27	2	8.2713	0.39837	0.75209	0.979028	350	3	8.2713
NCsgRNA_18	1	0.60076	0.60228	0.965938	383	0	8.8752	0.39924	0.39951	0.955127	351	1	8.8752
Eef1a1	2	0.59746	0.59583	0.965938	381	0	8.2505	0.40254	0.56496	0.969377	352	2	8.2505
Exosc9	3	0.16441	0.1736	0.952974	103	1	8.7732	0.40407	0.65868	0.979028	353	2	8.7732
B3gnt5	5	0.27481	0.29801	0.952974	175	1	8.2696	0.40631	0.7602	0.979028	354	4	8.2696
Rps23	1	0.59354	0.59451	0.965938	380	0	8.8565	0.40646	0.4063	0.955127	355	1	8.8565
H1f10	3	0.29921	0.29813	0.952974	191	1	7.0284	0.40709	0.66225	0.979028	356	2	7.0284
Ddb1	2	0.55173	0.54969	0.965938	354	0	8.6743	0.40718	0.57024	0.973121	357	2	8.6743
Esf1	1	0.59044	0.59137	0.965938	377	0	8.8398	0.40956	0.40971	0.955127	358	1	8.8398
Pcsk9	4	0.58857	0.58807	0.965938	376	0	7.5021	0.41143	0.72385	0.979028	359	4	7.5021
Parp1	4	0.58644	0.58597	0.965938	375	0	8.1806	0.41356	0.726	0.979028	360	4	8.1806
Eif5b	4	0.44585	0.44426	0.957444	290	0	7.8151	0.41454	0.72715	0.979028	361	4	7.8151
Dis3	1	0.58287	0.58389	0.965938	373	0	8.8138	0.41713	0.41731	0.955127	362	1	8.8138
Fbl	2	0.39548	0.39351	0.952974	259	0	8.2678	0.41825	0.58284	0.979028	363	2	8.2678
Ddx3x	2	0.5816	0.57948	0.965938	372	0	8.1681	0.4184	0.58302	0.979028	364	2	8.1681
Sap18	1	0.58081	0.58166	0.965938	371	0	8.8092	0.41919	0.41947	0.955127	365	1	8.8092
NCsgRNA_38	1	0.58012	0.5811	0.965938	370	0	8.808	0.41988	0.4202	0.955127	366	1	8.808
Tcerg1	3	0.02557	0.045481	0.952974	21	1	7.8018	0.4201	0.67662	0.979028	367	2	7.8018
Nop2	4	0.099241	0.14014	0.952974	68	1	8.7048	0.42032	0.73317	0.979028	368	3	8.7048
Rpl12	2	0.57714	0.57502	0.965938	368	0	8.0832	0.42286	0.58779	0.979028	369	2	8.0832
Mcm2	1	0.57669	0.57718	0.965938	367	0	8.8023	0.42331	0.42347	0.955127	370	1	8.8023
Ssrp1	4	0.5757	0.5755	0.965938	366	0	8.3718	0.4243	0.73696	0.979028	371	4	8.3718
Tma7	2	0.30804	0.30687	0.952974	197	0	7.7657	0.42609	0.59117	0.979028	372	2	7.7657
NCsgRNA_63	1	0.5705	0.57117	0.965938	364	0	8.7896	0.4295	0.4295	0.955127	373	1	8.7896
Dnaja1	3	0.56995	0.56858	0.965938	363	0	8.2761	0.43005	0.68714	0.979028	374	3	8.2761
Rpp40	5	0.5659	0.56713	0.965938	362	0	8.0014	0.4341	0.78683	0.979028	375	5	8.0014
Mrto4	1	0.56362	0.56456	0.965938	361	0	8.7614	0.43638	0.4366	0.955127	376	1	8.7614
Rtraf	1	0.5588	0.55943	0.965938	359	0	8.746	0.4412	0.4411	0.955127	377	1	8.746
Rpf1	2	0.55815	0.55619	0.965938	358	0	8.4316	0.44185	0.6084	0.979028	378	2	8.4316
Hmga1	4	0.3461	0.34669	0.952974	223	1	8.3785	0.44233	0.75465	0.979028	379	3	8.3785
Rps27a	1	0.55399	0.55444	0.965938	357	0	8.7352	0.44601	0.44591	0.955127	380	1	8.7352
Atrx	4	0.55358	0.5528	0.965938	356	0	7.849	0.44642	0.75852	0.979028	381	4	7.849
Mphosph6	2	0.55265	0.55052	0.965938	355	0	8.1435	0.44735	0.6143	0.979028	382	2	8.1435
Nhp2	1	0.54849	0.54867	0.965938	351	0	8.7206	0.45151	0.45142	0.955127	383	1	8.7206
Nol11	2	0.19136	0.19183	0.952974	118	1	4.2045	0.45287	0.62004	0.979028	384	1	4.2045
Eif2a	5	0.54524	0.54655	0.965938	350	0	8.1679	0.45476	0.80484	0.979823	385	5	8.1679
Tmem127	3	0.54418	0.54291	0.965938	349	0	8.0455	0.45582	0.71356	0.979028	386	3	8.0455
Ddx1	2	0.0048085	0.0097767	0.825052	8	1	-3.1218	0.45744	0.62513	0.979028	387	1	-3.1218
Farsb	3	0.54234	0.54093	0.965938	348	0	7.7382	0.45766	0.71523	0.979028	388	3	7.7382
Actr3	4	0.27755	0.28374	0.952974	177	1	7.8788	0.45846	0.76973	0.979028	389	3	7.8788
Dek	2	0.54014	0.53774	0.965938	346	0	8.0259	0.45986	0.6275	0.979028	390	2	8.0259
Tubb5	2	0.54014	0.53774	0.965938	345	0	8.5308	0.45986	0.6275	0.979028	391	2	8.5308
Rps6	1	0.53955	0.53927	0.965938	344	0	8.6948	0.46045	0.46039	0.955127	392	1	8.6948
Med21	4	0.26015	0.26856	0.952974	160	1	8.5003	0.46052	0.77168	0.979028	393	3	8.5003
Frg1	4	0.43068	0.42848	0.957444	278	0	8.1754	0.46072	0.77183	0.979028	394	4	8.1754
Fau	2	0.51748	0.51464	0.965938	326	0	8.5538	0.46199	0.62982	0.979028	395	2	8.5538
Nusap1	4	0.53683	0.53576	0.965938	343	0	8.5283	0.46317	0.77402	0.979028	396	4	8.5283
Taf15	1	0.5368	0.53652	0.965938	342	0	8.6886	0.4632	0.46309	0.955127	397	1	8.6886
Rbm28	3	0.53619	0.53469	0.965938	341	0	8.3879	0.46381	0.72114	0.979028	398	3	8.3879
NCsgRNA_37	1	0.53611	0.53581	0.965938	340	0	8.6874	0.46389	0.46388	0.955127	399	1	8.6874
Nat10	1	0.53336	0.53305	0.965938	338	0	8.6736	0.46664	0.4662	0.956775	400	1	8.6736
Usp39	3	0.53122	0.52957	0.965938	336	0	7.3948	0.46878	0.72611	0.979028	401	3	7.3948
Morf4l1	3	0.43574	0.43488	0.957444	283	0	8.6507	0.4701	0.72738	0.979028	402	3	8.6507
Nsun5	2	0.52841	0.52527	0.965938	335	0	8.5211	0.47159	0.63993	0.979028	403	2	8.5211
Aatf	1	0.52751	0.52737	0.965938	334	0	8.6647	0.47249	0.47219	0.962783	404	1	8.6647
Dhx33	2	0.52557	0.52246	0.965938	333	0	8.0793	0.47443	0.64313	0.979028	405	2	8.0793
Fus	3	0.52245	0.52062	0.965938	331	0	7.2572	0.47755	0.7347	0.979028	406	3	7.2572
Prkdc	2	0.5213	0.51829	0.965938	330	0	8.3272	0.4787	0.64748	0.979028	407	2	8.3272
Hnrnpc	3	0.36994	0.36871	0.952974	240	0	8.2427	0.47964	0.73656	0.979028	408	3	8.2427
Rps24	2	0.51987	0.51697	0.965938	329	0	7.9147	0.48013	0.64868	0.979028	409	2	7.9147
Cdca8	1	0.51891	0.5186	0.965938	328	0	8.6469	0.48109	0.48092	0.967866	410	1	8.6469
Cmss1	1	0.51754	0.51729	0.965938	327	0	8.6443	0.48246	0.48243	0.967866	411	1	8.6443
Exosc5	3	0.40855	0.40743	0.952974	266	0	7.5205	0.48363	0.74017	0.979028	412	3	7.5205
Nol12	2	0.51509	0.51226	0.965938	325	0	8.4173	0.48491	0.65327	0.979028	413	2	8.4173
Nsmce3	1	0.5141	0.51381	0.965938	324	0	8.634	0.4859	0.48582	0.967866	414	1	8.634
Rpl26	2	0.51365	0.51084	0.965938	323	0	7.9002	0.48635	0.65482	0.979028	415	2	7.9002
Gpatch4	5	0.51325	0.51498	0.965938	322	0	8.1927	0.48675	0.83007	0.983092	416	5	8.1927
Gar1	2	0.37227	0.37085	0.952974	243	0	8.1229	0.48691	0.65539	0.979028	417	2	8.1229
Dcaf13	3	0.033659	0.058744	0.952974	28	1	8.621	0.49175	0.74774	0.979028	418	2	8.621
Wdr55	3	0.50717	0.50489	0.965938	321	0	7.4634	0.49283	0.7488	0.979028	419	3	7.4634
Manf	2	0.26859	0.26842	0.952974	166	0	7.1104	0.49526	0.66346	0.979028	420	2	7.1104
NCsgRNA_65	1	0.50034	0.50017	0.965938	320	0	8.6618	0.49966	0.49959	0.967866	421	1	8.6618
Ddx51	2	0.49867	0.49563	0.965938	319	0	8.1831	0.50133	0.66937	0.979028	422	2	8.1831
Prpf8	2	0.49672	0.49353	0.965938	317	0	8.4151	0.50328	0.67152	0.979028	423	2	8.4151
Rbbp7	3	0.49549	0.49366	0.965938	316	0	7.7478	0.50451	0.75992	0.979028	424	3	7.7478
Syncrip	3	0.27284	0.27248	0.952974	171	1	5.5609	0.50652	0.76178	0.979028	425	2	5.5609
Kpna2	2	0.4933	0.49033	0.965938	314	0	8.2439	0.5067	0.67486	0.979028	426	2	8.2439
Phf6	4	0.19208	0.21257	0.952974	123	1	5.7877	0.50678	0.81153	0.983092	427	3	5.7877
NCsgRNA_61	1	0.4914	0.4912	0.965938	313	0	8.5746	0.5086	0.50856	0.967866	428	1	8.5746
Wbp11	3	0.29267	0.29155	0.952974	184	1	8.5827	0.50877	0.76345	0.979028	429	2	8.5827
Ran	1	0.48934	0.48905	0.965938	312	0	8.5679	0.51066	0.51049	0.967866	430	1	8.5679
Zfr	1	0.48831	0.48817	0.965938	311	0	8.5665	0.51169	0.51156	0.967866	431	1	8.5665
NCsgRNA_56	1	0.48728	0.48712	0.965938	310	0	8.5624	0.51272	0.51247	0.967866	432	1	8.5624
Wdr3	4	0.31971	0.3223	0.952974	208	1	8.1329	0.51276	0.81623	0.983092	433	3	8.1329
Nsa2	1	0.48384	0.48368	0.965938	309	0	8.6122	0.51616	0.51583	0.967866	434	1	8.6122
NCsgRNA_6	1	0.48246	0.48243	0.965938	308	0	8.5433	0.51754	0.51729	0.967866	435	1	8.5433
Nol7	2	0.19136	0.19183	0.952974	119	1	3.3806	0.52082	0.68888	0.979028	436	1	3.3806
Hnrnpll	4	0.2402	0.25189	0.952974	147	1	7.8319	0.52277	0.82362	0.983092	437	3	7.8319
Cebpz	3	0.35311	0.35197	0.952974	226	0	6.8792	0.52371	0.77682	0.979028	438	3	6.8792
Rps19bp1	3	0.38647	0.38544	0.952974	252	0	8.1945	0.52497	0.77804	0.979028	439	3	8.1945
Nipbl	1	0.47421	0.4739	0.965938	307	0	8.5239	0.52579	0.52581	0.967866	440	1	8.5239
Nosip	2	0.46903	0.46599	0.96114	306	0	8.1636	0.53097	0.69856	0.979028	441	2	8.1636
H2bc12	1	0.46871	0.46833	0.96114	305	0	8.5042	0.53129	0.53121	0.967866	442	1	8.5042
Mcm4	2	0.11026	0.1142	0.952974	75	1	2.4959	0.53218	0.69983	0.979028	443	1	2.4959
NCsgRNA_42	1	0.46699	0.46652	0.96114	304	0	8.4943	0.53301	0.53269	0.967866	444	1	8.4943
S100a4	2	0.44675	0.44411	0.957444	292	0	8.2998	0.53546	0.7031	0.979028	445	2	8.2998
Nvl	1	0.46252	0.46244	0.96114	301	0	8.4857	0.53748	0.53712	0.967866	446	1	8.4857
Surf6	1	0.45736	0.45737	0.959886	299	0	8.4742	0.54264	0.54251	0.967866	447	1	8.4742
Fam98b	2	0.45592	0.45345	0.957741	297	0	7.9412	0.54408	0.7117	0.979028	448	2	7.9412
Rpl28	2	0.45389	0.45141	0.957728	296	0	8.081	0.54611	0.71359	0.979028	449	2	8.081
3110082I17Rik	3	0.012887	0.024167	0.952974	13	2	-3.352	0.54844	0.79846	0.979823	450	1	-3.352
Snrnp70	3	0.17171	0.17998	0.952974	106	1	7.8155	0.55268	0.8019	0.979823	451	2	7.8155
Usp36	1	0.4467	0.44671	0.957444	291	0	8.4435	0.5533	0.55372	0.967866	452	1	8.4435
Sf3b2	1	0.44567	0.44555	0.957444	289	0	8.442	0.55433	0.55483	0.967866	453	1	8.442
Prpf4	1	0.44292	0.44302	0.957444	288	0	8.4391	0.55708	0.55762	0.96914	454	1	8.4391
Gapdh	1	0.43913	0.43921	0.957444	285	0	8.4287	0.56087	0.56155	0.96914	455	1	8.4287
NCsgRNA_2	1	0.43638	0.4366	0.957444	284	0	8.4227	0.56362	0.56456	0.969377	456	1	8.4227
Csnk1d	4	0.055215	0.095477	0.952974	42	1	6.6953	0.56466	0.85553	0.986805	457	3	6.6953
Ldha	1	0.43363	0.43364	0.957444	281	0	8.4668	0.56637	0.56726	0.970679	458	1	8.4668
Rps27	2	0.43337	0.43186	0.957444	280	0	8.03	0.56663	0.7329	0.979028	459	2	8.03
Slc35a2	3	0.32175	0.32048	0.952974	209	0	8.5149	0.56944	0.81562	0.983092	460	2	8.5149
Utp18	2	0.38041	0.37865	0.952974	248	0	8.0617	0.57086	0.73693	0.979028	461	2	8.0617
Rpl15	2	0.24248	0.24245	0.952974	150	0	6.0595	0.57804	0.7431	0.979028	462	2	6.0595
H1f3	3	0.27284	0.27248	0.952974	173	1	7.8269	0.58044	0.82394	0.983092	463	2	7.8269
Rad50	4	0.30934	0.3121	0.952974	199	1	8.2312	0.58288	0.86789	0.986805	464	3	8.2312
Emg1	3	0.41579	0.41469	0.952974	274	0	6.7467	0.58421	0.82689	0.983092	465	3	6.7467
Tma16	1	0.41472	0.41495	0.952974	273	0	8.3474	0.58528	0.58631	0.979028	466	1	8.3474
Rtcb	2	0.41458	0.41313	0.952974	272	0	7.9358	0.58542	0.75023	0.979028	467	2	7.9358
Rpl13a	1	0.41334	0.41357	0.952974	270	0	8.3458	0.58666	0.58768	0.979028	468	1	8.3458
Ifi204	3	0.39241	0.39113	0.952974	258	0	8.4346	0.5878	0.82946	0.983092	469	3	8.4346
Hspa5	1	0.41094	0.41117	0.952974	269	0	8.3331	0.58906	0.58998	0.979028	470	1	8.3331
Bzw1	3	0.41	0.40855	0.952974	268	0	8.3647	0.59	0.83124	0.983092	471	3	8.3647
Pop7	3	0.40563	0.4045	0.952974	265	0	7.1455	0.59437	0.83454	0.983283	472	3	7.1455
Prpf19	2	0.40188	0.39996	0.952974	262	0	7.9174	0.59812	0.7618	0.979028	473	2	7.9174
Rpl10	1	0.39924	0.39951	0.952974	260	0	8.2796	0.60076	0.60228	0.979028	474	1	8.2796
Nop58	1	0.39133	0.39174	0.952974	257	0	8.2478	0.60867	0.61024	0.979028	475	1	8.2478
Nol8	2	0.39066	0.38853	0.952974	256	0	8.0431	0.60934	0.77215	0.979028	476	2	8.0431
Rps11	1	0.38996	0.39046	0.952974	255	0	8.2427	0.61004	0.61185	0.979028	477	1	8.2427
Nolc1	3	0.38945	0.38829	0.952974	254	0	7.9587	0.61055	0.84639	0.986805	478	3	7.9587
Rbm3	2	0.38743	0.38532	0.952974	253	0	7.5895	0.61257	0.77495	0.979028	479	2	7.5895
Csnk1a1	2	0.38474	0.3827	0.952974	250	0	7.3066	0.61526	0.77697	0.979028	480	2	7.3066
Ring1	4	0.29039	0.2952	0.952974	181	1	8.2274	0.61602	0.88328	0.986805	481	3	8.2274
Eif2s1	2	0.36407	0.36233	0.952974	234	0	7.9446	0.61644	0.77801	0.979028	482	2	7.9446
Sfpq	1	0.37861	0.37913	0.952974	247	0	8.1874	0.62139	0.62326	0.979028	483	1	8.1874
Ola1	2	0.0034358	0.0068986	0.825052	3	1	-3.3494	0.62491	0.78534	0.979028	484	1	-3.3494
Kif2c	2	0.37227	0.37085	0.952974	242	0	7.9048	0.62773	0.78776	0.979028	485	2	7.9048
Rrp36	2	0.045549	0.054501	0.952974	37	1	-2.7162	0.62911	0.78883	0.979028	486	1	-2.7162
Rpl11	1	0.36864	0.3689	0.952974	238	0	8.1299	0.63136	0.63375	0.979028	487	1	8.1299
Incenp	1	0.36864	0.3689	0.952974	239	0	8.1299	0.63136	0.63375	0.979028	488	1	8.1299
Imp3	3	0.071472	0.094369	0.952974	55	1	7.8314	0.63142	0.86131	0.986805	489	2	7.8314
Anln	3	0.36766	0.36674	0.952974	237	0	6.7371	0.63234	0.86185	0.986805	490	3	6.7371
Ddx17	1	0.36623	0.36644	0.952974	236	0	8.1225	0.63377	0.63617	0.979028	491	1	8.1225
Rpl5	1	0.36417	0.36435	0.952974	235	0	8.1713	0.63583	0.63823	0.979028	492	1	8.1713
Ppp1ca	3	0.36385	0.363	0.952974	233	0	6.9722	0.63615	0.86435	0.986805	493	3	6.9722
Exosc8	1	0.36314	0.36336	0.952974	232	0	8.1114	0.63686	0.63921	0.979028	494	1	8.1114
Numa1	3	0.14411	0.15633	0.952974	93	1	8.3171	0.64115	0.86785	0.986805	495	2	8.3171
Utp4	2	0.070911	0.077566	0.952974	54	1	-1.7902	0.64198	0.79979	0.979823	496	1	-1.7902
Nle1	1	0.35626	0.35667	0.952974	229	0	8.0984	0.64374	0.64625	0.979028	497	1	8.0984
Hnrnpm	2	0.35526	0.35385	0.952974	228	0	7.7605	0.64474	0.80208	0.979823	498	2	7.7605
NCsgRNA_53	1	0.35385	0.35449	0.952974	227	0	8.0852	0.64615	0.64886	0.979028	499	1	8.0852
Ddx10	2	0.35083	0.34948	0.952974	225	0	7.7152	0.64917	0.80605	0.979823	500	2	7.7152
Pop4	1	0.35076	0.35139	0.952974	224	0	8.0757	0.64924	0.65223	0.979028	501	1	8.0757
Eef1g	2	0.24547	0.24549	0.952974	152	0	6.0438	0.64975	0.80653	0.979823	502	2	6.0438
Bms1	5	0.28801	0.309	0.952974	180	1	8.2829	0.65022	0.90915	0.987454	503	4	8.2829
Smc3	2	0.34082	0.33954	0.952974	217	0	7.6223	0.65918	0.81439	0.983092	504	2	7.6223
Abt1	4	0.25133	0.26122	0.952974	157	1	4.6709	0.65968	0.89963	0.98741	505	2	4.6709
Hsp90ab1	3	0.035918	0.06269	0.952974	30	2	-0.87211	0.66383	0.88349	0.986805	506	1	-0.87211
Ctdspl2	1	0.33528	0.33542	0.952974	215	0	7.9934	0.66472	0.66687	0.979028	507	1	7.9934
Hp1bp3	3	0.24581	0.24687	0.952974	153	1	8.2359	0.66583	0.88471	0.986805	508	2	8.2359
Rbm4	2	0.33298	0.33159	0.952974	213	0	7.7006	0.66702	0.82095	0.983092	509	2	7.7006
Rsl24d1	3	0.05964	0.084509	0.952974	46	1	7.6126	0.66978	0.88729	0.986805	510	2	7.6126
Kpna4	3	0.27284	0.27248	0.952974	172	1	7.1989	0.67224	0.88887	0.986805	511	2	7.1989
Tex10	3	0.12349	0.13871	0.952974	81	1	7.4836	0.67468	0.89017	0.986805	512	2	7.4836
Gtf2b	1	0.32359	0.32376	0.952974	210	0	7.9463	0.67641	0.678	0.979028	513	1	7.9463
Ncl	1	0.31671	0.31679	0.952974	207	0	7.9168	0.68329	0.68459	0.979028	514	1	7.9168
Prpf3	2	0.31602	0.31462	0.952974	206	0	7.2696	0.68398	0.83435	0.983283	515	2	7.2696
NCsgRNA_14	1	0.31465	0.31483	0.952974	205	0	7.8975	0.68535	0.68678	0.979028	516	1	7.8975
Xpo1	1	0.30983	0.31002	0.952974	200	0	7.878	0.69017	0.69146	0.979028	517	1	7.878
Mcm6	1	0.30812	0.30825	0.952974	198	0	7.8671	0.69188	0.6931	0.979028	518	1	7.8671
Rae1	2	0.3023	0.30106	0.952974	194	0	6.9095	0.6977	0.84501	0.986805	519	2	6.9095
Ftsj3	1	0.30089	0.3013	0.952974	193	0	7.8224	0.69911	0.70003	0.979028	520	1	7.8224
Sf3b6	1	0.30021	0.3006	0.952974	192	0	7.8201	0.69979	0.7007	0.979028	521	1	7.8201
Ncapg2	2	0.29885	0.29768	0.952974	190	0	7.2856	0.70115	0.84758	0.986805	522	2	7.2856
Nop53	1	0.29711	0.2978	0.952974	188	0	7.7949	0.70289	0.7037	0.979028	523	1	7.7949
Rps5	1	0.29539	0.29602	0.952974	186	0	7.7879	0.70461	0.70559	0.979028	524	1	7.7879
Nop10	1	0.29127	0.29149	0.952974	183	0	7.7621	0.70873	0.70932	0.979028	525	1	7.7621
Ruvbl1	3	0.053686	0.079395	0.952974	41	1	8.0908	0.71156	0.90226	0.98741	526	2	8.0908
Ewsr1	1	0.2868	0.28701	0.952974	179	0	7.7478	0.7132	0.71417	0.979028	527	1	7.7478
Rcl1	3	0.12538	0.14025	0.952974	82	1	8.0776	0.71581	0.90373	0.98741	528	2	8.0776
Cdk13	5	0.32646	0.34039	0.952974	212	1	7.7949	0.71859	0.93487	0.992254	529	4	7.7949
Rpp30	3	0.23378	0.2355	0.952974	141	1	8.0642	0.72003	0.90498	0.98741	530	2	8.0642
Bzw2	1	0.27957	0.27988	0.952974	178	0	7.7041	0.72043	0.72141	0.979028	531	1	7.7041
Noc3l	3	0.30731	0.30625	0.952974	196	1	8.0584	0.72237	0.90565	0.98741	532	2	8.0584
Snrpd3	1	0.27545	0.27617	0.952974	176	0	7.6642	0.72455	0.72599	0.979028	533	1	7.6642
Pelp1	1	0.27476	0.27542	0.952974	174	0	7.6591	0.72524	0.72683	0.979028	534	1	7.6591
Hdac1	2	0.2727	0.27238	0.952974	169	0	6.5914	0.7273	0.86671	0.986805	535	2	6.5914
Polr2l	2	0.014391	0.026501	0.952974	14	1	-3.2081	0.72858	0.86772	0.986805	536	1	-3.2081
Srp9	1	0.27063	0.27115	0.952974	168	0	7.6178	0.72937	0.73084	0.979028	537	1	7.6178
Polr1e	2	0.27035	0.27008	0.952974	167	0	6.5878	0.72965	0.86847	0.986805	538	2	6.5878
Rpl4	1	0.26754	0.26826	0.952974	165	0	7.5994	0.73246	0.73369	0.979028	539	1	7.5994
Pdlim7	5	0.30616	0.32337	0.952974	195	1	7.6932	0.73305	0.94018	0.992254	540	4	7.6932
Serf2	1	0.26651	0.26715	0.952974	163	0	7.5968	0.73349	0.73466	0.979028	541	1	7.5968
Hltf	3	0.24923	0.25007	0.952974	154	1	7.1846	0.73664	0.91041	0.987454	542	2	7.1846
Metap1	2	0.26328	0.26317	0.952974	161	0	6.4958	0.73672	0.87373	0.986805	543	2	6.4958
Snrpa1	2	0.19136	0.19183	0.952974	122	1	3.8843	0.74133	0.87711	0.986805	544	1	3.8843
Rps25	1	0.25791	0.25805	0.952974	159	0	7.5177	0.74209	0.74369	0.979028	545	1	7.5177
Nudt21	2	0.007551	0.01485	0.932609	10	1	-3.3236	0.74342	0.87834	0.986805	546	1	-3.3236
Nkrf	5	0.46609	0.46811	0.96114	303	0	7.9232	0.74347	0.9438	0.992254	547	4	7.9232
Gnl2	1	0.25481	0.25475	0.952974	158	0	7.5092	0.74519	0.74673	0.979028	548	1	7.5092
U2af2	1	0.24931	0.24917	0.952974	155	0	7.4575	0.75069	0.75206	0.979028	549	1	7.4575
Lmna	1	0.2445	0.24458	0.952974	151	0	7.41	0.7555	0.75697	0.979028	550	1	7.41
Rfc3	1	0.24106	0.24089	0.952974	149	0	7.3825	0.75894	0.76062	0.979028	551	1	7.3825
Snrnp200	1	0.24003	0.23987	0.952974	146	0	7.3764	0.75997	0.76173	0.979028	552	1	7.3764
Upf3b	2	0.23888	0.23873	0.952974	144	0	5.0087	0.76112	0.89095	0.986805	553	2	5.0087
Thyn1	2	0.23528	0.23513	0.952974	143	0	5.0915	0.76472	0.8934	0.986972	554	2	5.0915
Rpf2	2	0.23407	0.23398	0.952974	142	0	4.8633	0.76593	0.89425	0.986972	555	2	4.8633
Rpl7a	1	0.23212	0.23188	0.952974	140	0	7.3067	0.76788	0.76968	0.979028	556	1	7.3067
Cdk2	1	0.2273	0.22702	0.952974	138	0	7.2437	0.7727	0.77452	0.979028	557	1	7.2437
Wdr43	2	0.15636	0.15837	0.952974	100	1	3.0109	0.77447	0.89768	0.98741	558	1	3.0109
Rpl30	1	0.22146	0.22115	0.952974	136	0	7.2024	0.77854	0.78046	0.979028	559	1	7.2024
Utp23	1	0.21939	0.2191	0.952974	135	0	7.1742	0.78061	0.78254	0.979028	560	1	7.1742
Rbm14	1	0.21424	0.21365	0.952974	132	0	7.1418	0.78576	0.78776	0.979028	561	1	7.1418
Rplp2	1	0.20461	0.20441	0.952974	129	0	7.0165	0.79539	0.79725	0.979823	562	1	7.0165
S100a13	3	0.29431	0.29317	0.952974	185	1	7.8063	0.79746	0.9307	0.992254	563	2	7.8063
Arpc2	1	0.19979	0.19934	0.952974	128	0	6.918	0.80021	0.80224	0.979823	564	1	6.918
NCsgRNA_16	1	0.19807	0.19751	0.952974	126	0	6.9052	0.80193	0.80398	0.979823	565	1	6.9052
Exosc1	1	0.19532	0.19478	0.952974	125	0	6.8792	0.80468	0.80664	0.979823	566	1	6.8792
Rfc2	1	0.17847	0.17823	0.952974	111	0	6.5524	0.82153	0.82255	0.983092	567	1	6.5524
Trmt112	1	0.17779	0.17768	0.952974	110	0	6.6002	0.82221	0.8232	0.983092	568	1	6.6002
Rpl18a	1	0.17435	0.17444	0.952974	108	0	6.4852	0.82565	0.82662	0.983092	569	1	6.4852
Polr1g	3	0.27284	0.27248	0.952974	170	1	7.5618	0.82719	0.94075	0.992254	570	2	7.5618
Ilf3	3	0.16807	0.17675	0.952974	104	1	0.69619	0.83344	0.94282	0.992254	571	1	0.69619
Cpsf7	5	0.32395	0.33839	0.952974	211	1	7.6126	0.8385	0.97346	0.993421	572	4	7.6126
Pop1	1	0.15509	0.15465	0.952974	98	0	5.5389	0.84491	0.84561	0.986805	573	1	5.5389
Utp6	1	0.1544	0.15407	0.952974	97	0	5.4826	0.8456	0.84638	0.986805	574	1	5.4826
Top2b	3	0.15707	0.16717	0.952974	101	1	7.434	0.8476	0.94796	0.992254	575	2	7.434
Ppib	1	0.15234	0.15211	0.952974	94	0	5.3876	0.84766	0.84859	0.986805	576	1	5.3876
Grwd1	1	0.14374	0.14426	0.952974	92	0	4.9951	0.85626	0.85705	0.986805	577	1	4.9951
Poldip3	3	0.047707	0.074064	0.952974	38	1	7.3356	0.85968	0.95211	0.992254	578	2	7.3356
Rbm34	3	0.031641	0.055569	0.952974	26	1	7.3228	0.86116	0.95259	0.992254	579	2	7.3228
Cct2	1	0.13652	0.13704	0.952974	88	0	4.3319	0.86348	0.86459	0.986805	580	1	4.3319
Plec	1	0.13308	0.13362	0.952974	87	0	3.2944	0.86692	0.86785	0.986805	581	1	3.2944
Polr1c	1	0.1262	0.12683	0.952974	83	0	2.2707	0.8738	0.87449	0.986805	582	1	2.2707
Rps14	2	0.034768	0.044502	0.952974	29	1	-3.2854	0.87697	0.9281	0.992254	583	1	-3.2854
Pno1	1	0.12276	0.12352	0.952974	80	0	1.4269	0.87724	0.87788	0.986805	584	0	1.4269
Dhx15	4	0.17316	0.19705	0.952974	107	1	5.9369	0.87733	0.97444	0.993421	585	3	5.9369
Rps4x	1	0.12208	0.12267	0.952974	79	0	1.2219	0.87792	0.87858	0.986805	586	0	1.2219
NCsgRNA_25	1	0.11726	0.11782	0.952974	78	0	-0.45986	0.88274	0.88347	0.986805	587	0	-0.45986
Rpl38	1	0.1152	0.11576	0.952974	77	1	-0.13931	0.8848	0.88543	0.986805	588	0	-0.13931
NCsgRNA_55	1	0.11245	0.11295	0.952974	76	1	-0.99634	0.88755	0.88859	0.986805	589	0	-0.99634
Exosc2	1	0.10076	0.10161	0.952974	69	1	-0.85774	0.89924	0.90006	0.98741	590	0	-0.85774
Riox2	2	0.061607	0.068961	0.952974	47	1	-2.8742	0.90013	0.93658	0.992254	591	1	-2.8742
Ddx50	3	0.21286	0.21639	0.952974	130	1	6.761	0.90905	0.96936	0.993421	592	2	6.761
Dimt1	1	0.09044	0.09072	0.952974	65	1	-1.88	0.90956	0.91019	0.987454	593	0	-1.88
NCsgRNA_28	1	0.087001	0.087229	0.952974	63	1	-2.2712	0.913	0.91357	0.989179	594	0	-2.2712
Pnkp	3	0.015395	0.028222	0.952974	15	1	6.5849	0.91521	0.97167	0.993421	595	2	6.5849
Rps8	1	0.08425	0.084766	0.952974	62	1	-2.3802	0.91575	0.91613	0.990245	596	0	-2.3802
Eif2s3x	2	0.041513	0.050723	0.952974	34	1	-3.3734	0.91854	0.94404	0.992254	597	1	-3.3734
NCsgRNA_59	1	0.078748	0.079267	0.952974	60	1	-2.674	0.92125	0.92175	0.992254	598	0	-2.674
NCsgRNA_21	1	0.071871	0.072383	0.952974	56	1	-3.1435	0.92813	0.92856	0.992254	599	0	-3.1435
Pcbp1	2	0.092003	0.097485	0.952974	66	1	1.2803	0.92971	0.94906	0.992254	600	1	1.2803
Wdr5	4	0.053038	0.091847	0.952974	40	2	2.7187	0.93022	0.98835	0.996286	601	2	2.7187
Llph	1	0.068432	0.068773	0.952974	52	1	-3.311	0.93157	0.93185	0.992254	602	0	-3.311
NCsgRNA_11	1	0.064993	0.06545	0.952974	50	1	-3.4481	0.93501	0.93525	0.992254	603	0	-3.4481
Arpc3	1	0.064305	0.064777	0.952974	49	1	-3.5312	0.93569	0.93592	0.992254	604	0	-3.5312
Ddx5	2	0.19136	0.19183	0.952974	121	1	2.5694	0.93577	0.95218	0.992254	605	1	2.5694
Atp5f1b	2	0.066929	0.074074	0.952974	51	1	-2.8376	0.93646	0.95249	0.992254	606	1	-2.8376
Pak1ip1	2	0.037469	0.046955	0.952974	32	1	-2.8188	0.93819	0.95334	0.992254	607	1	-2.8188
Ddx41	2	0.019846	0.031219	0.952974	17	1	-3.8043	0.94072	0.95464	0.992254	608	1	-3.8043
Eef2	1	0.058803	0.05916	0.952974	45	1	-4.06	0.9412	0.94156	0.992254	609	0	-4.06
Imp4	1	0.04436	0.044601	0.952974	36	1	-5.471	0.95564	0.95591	0.992254	610	0	-5.471
Mybbp1a	2	0.056269	0.063828	0.952974	43	1	-3.4616	0.95629	0.96345	0.993244	611	1	-3.4616
Nsmce1	1	0.041609	0.041733	0.952974	35	1	-6.1619	0.95839	0.95888	0.993244	612	0	-6.1619
Rps19	2	0.19136	0.19183	0.952974	120	1	3.0714	0.9587	0.96478	0.993244	613	1	3.0714
Atm	1	0.040234	0.040012	0.952974	33	1	-7.7282	0.95977	0.96007	0.993244	614	0	-7.7282
Ptbp1	1	0.036795	0.036817	0.952974	31	1	-10.883	0.9632	0.96375	0.993244	615	0	-10.883
Rpl6	2	0.076207	0.082669	0.952974	58	1	-1.8679	0.96344	0.96765	0.993421	616	1	-1.8679
Gnl3	1	0.030605	0.030873	0.952974	25	1	-13.69	0.96939	0.96979	0.993421	617	0	-13.69
NCsgRNA_52	1	0.023728	0.023772	0.952974	19	1	-14.31	0.97627	0.97641	0.993814	618	0	-14.31
Snrpe	2	0.1777	0.17864	0.952974	109	1	1.0467	0.98201	0.98153	0.996286	619	1	1.0467
Exosc3	2	0.057605	0.065074	0.952974	44	1	-4.7242	0.98337	0.98279	0.996286	620	1	-4.7242
Nop14	2	0.15509	0.15707	0.952974	99	1	-0.92376	0.98568	0.98508	0.996286	621	0	-0.92376
Mphosph10	3	0.10829	0.12605	0.952974	73	1	0.69619	0.98658	0.99294	0.998559	622	1	0.69619
Pwp2	1	0.012036	0.011824	0.825052	12	1	-14.988	0.98796	0.98803	0.996286	623	0	-14.988
Cutc	2	0.011585	0.022387	0.952974	11	2	-1.6165	0.98841	0.98798	0.996286	624	0	-1.6165
Ncapd3	2	0.0047775	0.0096976	0.825052	7	2	-3.6725	0.99522	0.99492	0.998559	625	0	-3.6725
NCsgRNA_58	1	0.0044704	0.0042084	0.825052	6	1	-15.24	0.99553	0.99558	0.998559	626	0	-15.24
Gtpbp4	1	0.0030949	0.0028534	0.825052	2	1	-15.292	0.99691	0.99697	0.998559	627	0	-15.292
Banf1	1	0.00034388	0.00037089	0.232919	1	1	-14.693	0.99966	0.99971	0.999708	628	0	-14.693

## Sheet: Table4. sgRNA-shRNA sequences
Supplementary Table 7
homo sapiens sgRNA oligo sequences
sgNC-F	CACCGGGCGGTCCTTACAAGACGGG
sgNC-R	AAACCCCGTCTTGTAAGGACCGCCC
h-OTUD4-sg1-F	CACCGTCTTCAATACAGGAATGGGT
h-OTUD4-sg1-R	:AAACACCCATTCCTGTATTGAAGAC
h-OTUD4-sg2-F	CACCG TGAAGAATATTTAAAGCGTT
h-OTUD4-sg2-R	AAAC AACGCTTTAAATATTCTTCAC
Mus musculus sgRNA oligo sequences
sgNC-F	CACCGGTCCGCCCTGCAGCAACCGG
sgNC-R	AAACCCGGTTGCTGCAGGGCGGACC
m-OTUD4-sg1-F	CACCGTGAGATGGAGGGATAACCAG
m-OTUD4-sg1-R	AAACCTGGTTATCCCTCCATCTCAC
m-OTUD4-sg2-F	CACCGAATTCTCCTTTATCATCAGG
m-OTUD4-sg2-R	AAACCCTGATGATAAAGGAGAATTC
m-IRF1-sg-F	CACCGCTTTTTCTCCTGCTTTGTAT
m-IRF1-sg-R	AAACATACAAAGCAGGAGAAAAAGC
m-TET2-sg-F	CACCGATCTGCGCTGAGGTAAGCGA
m-TET2-sg-R	AAACTCGCTTACCTCAGCGCAGATC
m-B2M-sg-F	CACCG AGTATACTCACGCCACCCAC
m-B2M-sg-R	AAAC GTGGGTGGCGTGAGTATACTC
m-SETDB1-sg-F	CACCGGTAATCTATAAGACACCCTG
m-SETDB1-sg-R	AAACCAGGGTGTCTTATAGATTACC
m-TRIM28-sg-F	CACCGCTGTGTGGAGGCTCACCAG
m-TRIM28-sg-R	AAACCTGGTGAGCCTCCACACAGC
m-cGAS-sg-F	CACCGTCTCGTACCCAAGAATGCAA
m-cGAS-sg-R	AAACTTGCATTCTTGGGTACGAGAC
m-MAVS-sg-F	CACCGATACTGTGACCCCAGACAAG
m-MAVS-sg-R	AAACCTTGTCTGGGGTCACAGTATC
m-L1mec-sg-F1	CACCGCCGGCCAAGATGGAGTAACA
m-L1mec-sg-R1	AAACTGTTACTCCATCTTGGCCGGC
m-L1mec-sg-F2	CACCGTGAGAGACGGGAAACAAACG
m-L1mec-sg-R2	AAACCGTTTGTTTCCCGTCTCTCAC
m-L1mec-sg-F3	CACCGACGGAGCTGAGAGTCCGGGG
m-L1mec-sg-R3	AAACCCCCGGACTCTCAGCTCCGTC
m-L1mec-sg-F4	CACCGGCATGTGAGGAAACTACCCG
m-L1mec-sg-R4	AAACCGGGTAGTTTCCTCACATGCC
m-L1mec-sg-F5	CACCGATTGGGTAGAGTACTCAGAA
m-L1mec-sg-R5	AAACTTCTGAGTACTCTACCCAATC
m-L1mec-sg-F6	CACCGTGGGACGCAGTTAAGTTACT
m-L1mec-sg-R6	AAACAGTAACTTAACTGCGTCCCAC
homo sapiens shRNA oligo sequences
h-OTUD4-sh1-F	CCGGGCTGATTATGAAGAGTCACTACTCGAGTAGTGACTCTTCATAATCAGCTTTTTG
h-OTUD4-sh1-R	AATTCAAAAAGCTGATTATGAAGAGTCACTACTCGAGTAGTGACTCTTCATAATCAGC
h-OTUD4-sh2-F	CCGGGAGGCCAGTGTTAATGGTCAACTCGAGTTGACCATTAACACTGGCCTCTTTTTG
h-OTUD4-sh2-R	AATTCAAAAAGAGGCCAGTGTTAATGGTCAACTCGAGTTGACCATTAACACTGGCCTC
h-POLR1A-sh1-F	CCGGTACATCAACACCAACGAAATTCTCGAGAATTTCGTTGGTGTTGATGTATTTTTG
h-POLR1A-sh1-R	AATTCAAAAATACATCAACACCAACGAAATTCTCGAGAATTTCGTTGGTGTTGATGTA
h-POLR1A-sh2-F	CCGGTCTAGCACCAGCAATACATTTCTCGAGAAATGTATTGCTGGTGCTAGATTTTTG
h-POLR1A-sh2-R	AATTCAAAAATCTAGCACCAGCAATACATTTCTCGAGAAATGTATTGCTGGTGCTAGA
h-POLR2A-sh1-F	CCGGGCAGGACGTAATAGAGGTCATCTCGAGATGACCTCTATTACGTCCTGCTTTTTG
h-POLR2A-sh1-R	AATTCAAAAAGCAGGACGTAATAGAGGTCATCTCGAGATGACCTCTATTACGTCCTGC
h-POLR2A-sh2-F	CCGGGGGAGGAGATGGACAACAAGTCTCGAGACTTGTTGTCCATCTCCTCCCTTTTTG
h-POLR2A-sh2-R	AATTCAAAAAGGGAGGAGATGGACAACAAGTCTCGAGACTTGTTGTCCATCTCCTCCC
h-NPM1-sh1-F	CCGGGCCAAGAATGTGTTGTCCAAACTCGAGTTTGGACAACACATTCTTGGCTTTTTG
h-NPM1-sh1-R	AATTCAAAAAGCCAAGAATGTGTTGTCCAAACTCGAGTTTGGACAACACATTCTTGGC
h-NPM1-sh2-F	CCGGTCCCTACCGTGTTTGATAAATCTCGAGATTTATCAAACACGGTAGGGATTTTTG
h-NPM1-sh2-R	AATTCAAAAATCCCTACCGTGTTTGATAAATCTCGAGATTTATCAAACACGGTAGGGA
Mus musculus shRNA oligo sequences
m-OTUD4-sh1-F	CCGGTGTCTATCCCATAACATATAACTCGAGTTATATGTTATGGGATAGACATTTTTG
m-OTUD4-sh1-R	AATTCAAAAATGTCTATCCCATAACATATAACTCGAGTTATATGTTATGGGATAGACA
m-OTUD4-sh2-F	CCGGCCGTGTCACAAGCGCATTTAACTCGAGTTAAATGCGCTTGTGACACGGTTTTTG
m-OTUD4-sh2-R	AATTCAAAAACCGTGTCACAAGCGCATTTAACTCGAGTTAAATGCGCTTGTGACACGG
m-NPM1-sh1-F	CCGGGCAGAAGCAATGAACTATGAACTCGAGTTCATAGTTCATTGCTTCTGCTTTTTG
m-NPM1-sh1-R	AATTCAAAAAGCAGAAGCAATGAACTATGAACTCGAGTTCATAGTTCATTGCTTCTGC
m-NPM1-sh2-F	CCGGGCTGACAAAGACTATCACTTTCTCGAGAAAGTGATAGTCTTTGTCAGCTTTTTG
m-NPM1-sh2-R	AATTCAAAAAGCTGACAAAGACTATCACTTTCTCGAGAAAGTGATAGTCTTTGTCAGC
m-POLR1A-sh1-F	CCGGGATCCTTCCGCCTTCGAAATTCTCGAGAATTTCGAAGGCGGAAGGATCTTTTTG
m-POLR1A-sh1-R	AATTCAAAAAGATCCTTCCGCCTTCGAAATTCTCGAGAATTTCGAAGGCGGAAGGATC
m-POLR1A-sh2-F	CCGGCTCCTGTTTGAGTTGCCACATCTCGAGATGTGGCAACTCAAACAGGAGTTTTTG
m-POLR1A-sh2-R	AATTCAAAAACTCCTGTTTGAGTTGCCACATCTCGAGATGTGGCAACTCAAACAGGAG
m-POLR2A-sh1-F	CCGGGCTACACTTAAACCTTCTAATCTCGAGATTAGAAGGTTTAAGTGTAGCTTTTTG
m-POLR2A-sh1-R	AATTCAAAAAGCTACACTTAAACCTTCTAATCTCGAGATTAGAAGGTTTAAGTGTAGC
m-POLR2A-sh2-F	CCGGCGAGTGCATGAAATCTTCAAACTCGAGTTTGAAGATTTCATGCACTCGTTTTTG
m-POLR2A-sh2-R	AATTCAAAAACGAGTGCATGAAATCTTCAAACTCGAGTTTGAAGATTTCATGCACTCG
m-CSNK2A-sh1-F	CCGGTCCGAGTTGCTTCTCGATATTCTCGAGAATATCGAGAAGCAACTCGGATTTTTG
m-CSNK2A-sh1-R	AATTCAAAAATCCGAGTTGCTTCTCGATATTCTCGAGAATATCGAGAAGCAACTCGGA
m-CSNK2A-sh2-F	CCGGCAACACAGACTTCAAGCAATTCTCGAGAATTGCTTGAAGTCTGTGTTGTTTTTG
m-CSNK2A-sh2-R	AATTCAAAAACAACACAGACTTCAAGCAATTCTCGAGAATTGCTTGAAGTCTGTGTTG
m-CSNK2B-sh1-F	CCGGGCATCGCACAAATGTTGGAAACTCGAGTTTCCAACATTTGTGCGATGCTTTTTG
m-CSNK2B-sh1-R	AATTCAAAAAGCATCGCACAAATGTTGGAAACTCGAGTTTCCAACATTTGTGCGATGC
m-CSNK2B-sh2-F	CCGGGACATGATCTTAGACCTGGAACTCGAGTTCCAGGTCTAAGATCATGTCTTTTTG
m-CSNK2B-sh2-R	AATTCAAAAAGACATGATCTTAGACCTGGAACTCGAGTTCCAGGTCTAAGATCATGTC

## Sheet: Table5. primer sequence
Supplementary Table 8
homo sapiens primer sequences
h-actin-F	ACACTGTGCCCATCTACGAG
h-actin-R	TCAACGTCACACTTCATGATG
h-OTUD4-F	AGTAGCAATCCATGTGTCCAG
h-OTUD4-R	TTTGTTCCGCAGGAGAAGG
h-TAP1-F	TGACTGGATTCTACAAGATGGC
h-TAP1-R	CTGGCTATGGTGAGAATGGAC
h-TAP2-F	TGACTGGATTCTACAAGATGGC
h-TAP2-R	CTGGCTATGGTGAGAATGGAC
h-HLA-A-F	TCCCTCACAGCTTGTAAAGTG
h-HLA-A-R	ATGCCTACACGAACACAGAC
h-HLA-B-F	GAGAACGGGAAGGACAAGC
h-HLA-B-R	GATCTCCGCAGGGTAGAAAC
h-HLA-C-F	GGACAAGAGCAGAGATACACG
h-HLA-C-R	CAAGGACAGCTAGGACAACC
h-IFNB-F	CAGCAATTTTCAGTGTCAGAAGC
h-IFNB-R	TCATCCTGTCCTTGAGGCAGT
h-IFI44-F	ACGCATCAGGCTTTGGTGGG
h-IFI44-R	GCACAGGCCGCCTTCTTTCT
h-OAS3-F	GACCATCTTCGCCTGGGAGC
h-OAS3-R	AACTGCCCAACTGCAGGGTC
h-ERVK-F	TGATCCCMAAAGAYTGGCCTT
h-ERVK-R	TTAAGCATTCCCTGAGGYAACA
h-ERVL-F	ATATCCTGCCTGGATGGGGT
h-ERVL-R	GAGCTTCTTAGTCCTCCTGTGT
h-L1M2-F	CTGCTGCCACTGAAAGCAAC
h-L1M2-R	GATTCTTGGGCCTCCAGGTG
h-L1M3-F	CCTACGGAATGGGAGAAAAT
h-L1M3-R	TGTCTATTCAGGTCCTTTGC
h-L1MB3--F	GTTGGCGAGGATGTGGAGAA
h-L1MB3-R	GTTGTGCAACCATCACCACC
h-L1M4-F	TCTCACCTCTGGCTGACCTT
h-L1M4-R	AAGTCTCCCAGTCTTTGCCG
h-NPM1-F	ACGGTCAGTTTAGGGGCTG
h-NPM1-R	CTGTGGAACCTTGCTACCACC
h-5'EST-F	GGTATATCTTTCGCTCCGAG
h-5'EST-R	GACGACAGGTCGCCAGAGGA
h-47S-F	GGCGGTTTGAGTGAGACGAGA
h-47S-R	ACGTGCGCTCACCGAGAGCAG
h-18S-F	CGACGACCCATTCGAACGTCT
h-18S-R	CTCTCCGGAATCGAACCCTGA
h-5.8S-F	AGTCGGGTTGCTTGGGAATGC
h-5.8S-R	CCCTTACGGTACTTGTTGACT
h-28S-F	GAGCTCAGGGAGGACAGAAA
h-28S-R	AGGTCAGAAGGATCGTGAGG
h-POL1A-F	AGTTTTATCCAGAGCAGATCCC
h-POL1A-R	TTCCTTCGGCTTTCCTCATC
h-POL2A-F	AAGACAGTGGCCCTTACAAG
h-POL2A-R	AATGCCAATAGTATGACCCTCG
Mus musculus primer sequences
m-actin-F	ACACTGTGCCCATCTACGAG
m-actin-R	TCAACGTCACACTTCATGATG
m-H2-kb-F	GCTGGTGAAGCAGAGAGACTCAG
m-H2-kb-R	GGTGACTTTATCTTCAGGTCTGCT
m-H2-db-F	AGTGGTGCTGCAGAGCATTACAA
m-H2-db-R	GGTGACTTCACCTTTAGATCTGGG
m-Tap1-F	GGACTTGCCTTGTTCCGAGAG
m-Tap1-R	GCTGCCACATAACTGATAGCGA
m-Tap2-F	CTGGCGGACATGGCTTTACTT
m-Tap2-R	CTCCCACTTTTAGCAGTCCCC
m-IFNB-F	AGCTCCAAGAAAGGACGAACA
m-IFNB-R	GCCCTGTAGGTGAGGTTGAT
m-OAS3-F	CCCTTGGCAATCCTTATCAC
m-OAS3-R	CTGAGTTCACAGCAGCCGTA
m-ISG15-F	CGATTTCCTGGTGTCCGTGA
m-ISG15-R	AGCCAGAACTGGTCTTCGTG
m-IFI44-F	GGGCAGCATCACACACCAGA
m-IFI44-R	TTCTCACCCAGCCCCAGTGA
m-CXCL10-F	CATCACTCCCCTTTACCCAG
m-CXCL10-R	GCACCTCCACATAGCTTACAG
m-NPM1-F	ATGGAAGACTCGATGGATATGGA
m-NPM1-R	ACCGTTCTTAATGACAACTGGTG
m-L1 3' UTR-F	TGTATACATGTGCCATGCTGGTGC
m-L1 3' UTR-R	AATGAGATCACATGGACACA
m-L1 5' UTR-F	GATGATGGTGATGTACAGATGGG
m-L1 5' UTR-R	AGCCTAACTGGGAGGCACCC
m-IRF7-F	TGTGCACTCCACAGCACAGG
m-IRF7-R	TGGCTGGGCCCACAGTAGAT
m-IFI44-F	GGGCAGCATCACACACCAGA
m-IFI44-R	TTCTCACCCAGCCCCAGTGA
m-MMERVK10C-F	CAAATAGCCCTACCATATGTCAG
m-MMERVK10C-R	GTATACTTTCTTCTTCAGGTCCAC
m-MERVL-F	ATCTCCTGGCACCTGGTATG
m-MERVL-R	AGAAGAAGGCATTTGCCAGA
m-MER21C-F	TTGCTCCCAAGTTCTGTG
m-MER21C-R	CTCTTAGCTGGCCCTCTG
m-L1M2-F	CTGCTGCCACTGAAAGCAAC
m-L1M2-R	GATTCTTGGGCCTCCAGGTG
m-L1M3-F	CCTACGGAATGGGAGAAAAT
m-L1M3-R	TGTCTATTCAGGTCCTTTGC
m-L1MB3--F	GTTGGCGAGGATGTGGAGAA
m-L1MB3-R	GTTGTGCAACCATCACCACC
m-L1M4-F	TCTCACCTCTGGCTGACCTT
m-L1M4-R	AAGTCTCCCAGTCTTTGCCG
m-L1MEC--F	AAATTCATCCCATCCACA
m-L1MEC-R	TCCATTCATCAGAAACCC
m-MTB-F	AATGCCTCCACGAGATCCAG
m-MTB-R	CCTGCACAAACATCATGACCA
m-MTC-F	AGCTACTGTCATCTGAGAGGAGA
m-MTC-R	AGCAAGTTGGGGAAGAAAGGA
m-MTD-F	GAGAAAATGCCCCATCAGAGG
m-MTD-R	ACTGCAATGATAAAACACCAACCA
m-B1-MUR4-F	AGTGGTGGTGCATGCCTTTA
m-B1-MUR4-R	GCCTTCAAGACCCGGTTTCT
m-L1-Rod-F	TGTGGTGTTCTTTGACCTCTT
m-L1-Rod-R	AAGAGGTCAAAGAACACCACA
m-ORR1E-F	TAGGTTGGTCCTCAGCTGGT
m-ORR1E-R	GAATGCCACAGAAGGGACCA
m-RLTR17B-F	CGCAGGCATGTATGTCAGTG
m-RLTR17B-R	AGAGCACACACATCCCCATC
m-5'EST-F	GGTCATTTTTGGGCCACCTC
m-5'EST-R	CGACAGACCCAAGCCAGTAA
m-47S-F	TTTTCTCTTCCCGGTCTTTCTTCC
m-47S-R	CACAGAACAAGAGAACACAACGAG
m-18S-F	GGTAACCCGTTGAACCCCAT
m-18S-R	AGTTCGACCGTCTTCTCAGC
m-5.8S-F	CTTAGCGGTGGATCACTCGG
m-5.8S-R	AGTGCGTTCGAAGTGTCGAT
m-28S-F	TCTCGCTGGCCCTTGAAAAT
m-28S-R	TGTTCACCTTGGAGACCTGC
m-MX1-F	CCCTGAAGGGGATAGGACCA
m-MX1-R	CCGGCTGTCTCCCTCTGATA
m-POL1A-F	GCATGGCAGGACGAGAAGG
m-POL1A-R	GATCGTACTGGATGACCAGCC
m-POL2A-F	CTAAGGGGCAGCCAAAGAAAC
m-POL2A-R	CCATTCAGCATACAACTCTAGGC

## Sheet: Table6. reagent
Supplementary Table 9
REAGENT or RESOURCE	SOURCE	IDENTIFIER
Antibodies
PerCP/Cyanine5.5 anti-mouse CD45	BioLegend	Cat# 103132; RRID:AB_893340
APC/Cyanine7 anti-mouse H-2Kd	BioLegend	Cat# 116630; RRID:AB_2616847
APC anti-human HLA-A2	BioLegend	Cat# 343308; RRID:AB_2616847
PE anti-mouse H-2	BioLegend	Cat# 125506; RRID:AB_1227705
APC anti-mouse/human CD11b	BioLegend	Cat# 101212; RRID:AB_312794
Brilliant Violet 510 anti-mouse CD11c	BioLegend	Cat# 117353; RRID:AB_2562016
PE anti-mouse/human CD44	BioLegend	Cat# 103024; RRID:AB_312958
FITC anti-mouse CD3	BioLegend	Cat# 100203; RRID: AB_31266
Brilliant Violet 510 anti-mouse CD3	BioLegend	Cat# 100233; RRID:AB_2561387
Brilliant Violet 711™ anti-mouse IFN-γ Antibody	BioLegend	Cat# 505836; RRID:AB_11219588
Brilliant Violet 421 anti-human/mouse Granzyme B Recombinant	BioLegend	Cat# 396414; RRID:AB_2810603
PE anti-mouse/human Ki-67	BioLegend	Cat# 151210; RRID:AB_2716008
APC anti-mouse H-2Kb bound to SIINFEKL	BioLegend	Cat# 141605; RRID:AB_11219402
Brilliant Violet 785 anti-mouse CD366 (Tim-3)	BioLegend	Cat# 119725; RRID:AB_2716066
TruStain FcX (anti-mouse CD16/32)	BioLegend	Cat# 101320; RRID:AB_1574973
Human TruStain FcX™ (Fc Receptor Blocking Solution)	BioLegend	Cat# 422302; RRID:AB_2818986
Brilliant Violet 711 anti-mouse Ly-6G	BioLegend	Cat# 127643; RRID:AB_2565971
Brilliant Violet 605 anti-mouse Ly-6C	BioLegend	Cat# 128035; RRID:AB_2562352
Brilliant Violet 421™ anti-mouse MHC class II	BioLegend	Cat# 107631; RRID:AB_10900075
PE anti-mouse FcεRIα	BioLegend	Cat# 134307; RRID:AB_1626095
APC anti-human CD66b	BioLegend	Cat# 305118; RRID:AB_2566607
APC/Cyanine7 anti-mouse CD62L	BioLegend	Cat# 104428; RRID:AB_830798
PE anti-mouse F4/80	BioLegend	Cat# 123110; RRID:AB_893486
Brilliant Violet 605™ anti-mouse CD86	BioLegend	Cat# 105125; RRID:AB_2892271
APC anti-mouse CD8a	BioLegend	Cat# 100712; RRID:AB_312750
FITC anti-mouse CD4	BioLegend	Cat# 100406; RRID:AB_312690
PE anti-mouse CD4	BioLegend	Cat# 100408; RRID:AB_312692
Brilliant Violet 510 anti-mouse CD4	BioLegend	Cat# 100449; RRID:AB_2564587
Tri-Methyl-Histone H3 (Lys9) (D4W1U) Rabbit mAb	Cell Signaling Technology	Cat# 13969S; RRID:AB_2798355
Acetyl-Histone H3 (Lys27) (D5E4) XP Rabbit mAb	Cell Signaling Technology	Cat# 8173S; RRID:AB_10949503
Di-Methyl-Histone H3 (Lys9) (D85B4) XP® Rabbit mAb	Cell Signaling Technology	Cat# 4658S; RRID:AB_10544405
Tri-Methyl-Histone H3 (Lys27) (C36B11) Rabbit mAb	Cell Signaling Technology	Cat# 9733S; RRID:AB_2616029
AbFlex Histone H4K20me3 antibody (rAb)	ACTIVE MOTIF	Cat# 91107; RRID:AB_2793777
MAVS Antibody (Rodent Specific)	Cell Signaling Technology	Cat# 4983S; RRID:AB_823566
rabbit anti-HP1alpha	Cell Signaling Technology	Cat# 2616S; RRID:AB_2070987
cGAS (D3O8O) Rabbit mAb (Mouse Specific)	Cell Signaling Technology	Cat# 31659S; RRID:AB_2799008
Phospho-TBK1/NAK (Ser172) (D52C2) XP® Rabbit mAb	Cell Signaling Technology	Cat# 5483S; RRID:AB_2943237
TBK1/NAK (D1B4) Rabbit mAb	Cell Signaling Technology	Cat# 3504S; RRID:AB_2255663
Histone H3 Rabbit Antibody	Cell Signaling Technology	Cat# 9715S; RRID:AB_331563
STING (D2P2F) Rabbit mAb	Cell Signaling Technology	Cat# 13647S; RRID:AB_2732796
Phospho-STING (Ser365) (D8F4W) Rabbit mAb	Cell Signaling Technology	Cat# 72971S; RRID:AB_2799831
CREB (48H2) Rabbit mAb	Cell Signaling Technology	Cat# 9197S; RRID:AB_331277
IRF-1 (D5E4) Rabbit Monoclonal Antibody	Cell Signaling Technology	Cat# 8478T; RRID:AB_10949108
IRF-3 (D83B9) Rabbit mAb	Cell Signaling Technology	Cat# 4302S; RRID:AB_1904036
Phospho-IRF-3 (Ser396) (4D4G) Rabbit mAb	Cell Signaling Technology	Cat# 4947S; RRID:AB_823547
p53 (1C12) Mouse mAb	Cell Signaling Technology	Cat# 2524S; RRID:AB_331743
rabbit anti-actin	Proteintech	Cat# 81115; RRID:AB_2935094
mouse anti-GAPDH	Proteintech	Cat# 60004; RRID:AB_2919223
mouse anti-vinculin	Proteintech	Cat# 66305; RRID:AB_2810300
rabbit-Beta-2-Microglobulin Polyclonal Antibody	Proteintech	Cat# 13511; RRID:AB_2919075
Ovalbumin Mouse Monoclonal Antibody	Proteintech	Cat# 67614; RRID:AB_2882817
B23/NPM1 Mouse Monoclonal Antibody	Proteintech	Cat# 60096; RRID:AB_2883422
OTUD4 Rabbit Polyclonal Antibody	Proteintech	Cat# 25070; RRID:AB_2879882
rabbit IgG control Polyclonal Antibody	Proteintech	Cat# 30000; RRID:AB_2819035
SETDB1 Rabbit Polyclonal Antibody	Proteintech	Cat# 11231-1-AP; RRID:AB_2186069
TRIM28 Rabbit Polyclonal Antibody	Proteintech	Cat# 15202-1-AP; RRID:AB_2209890
6*His, His-tag Polyclonal Antibody	Proteintech	Cat# 10001-0-AP; RRID:AB_11232228
HA tag Polyclonal Antibody	Proteintech	Cat# 51064-2-AP;RRID:AB_11042321
Rabbit polyclonal to Nucleophosmin(NPM1)	Abcam	Cat# ab15440; RRID:AB_2236288
Mouse monoclonal to Fibrillarin	Abcam	Cat# ab4566; RRID:AB_304523
Fibrillarin/U3 RNP Rabbit mAb	Abclonal	Cat# A0850; RRID:AB_2861482
Lamin A/C Rabbit mAb	Abclonal	Cat# A19524; RRID:AB_2862647
Anti -CD4 Rabbit pAb	Servicebio	Cat# GB11064; RRID:AB_2904187
Anti- CD8 alpha Rabbit pAb	Servicebio	Cat# GB114196; RRID:AB_3064847
rabbit IgG - AF488 conjugated (secondary)	Servicebio	Cat# GB25303; RRID:AB_2910224
rabbit IgG - CY5 conjugated (secondary)	Servicebio	Cat# GB27303; RRID:AB_2905513
mouse IgG - CY3 conjugated (secondary)	Servicebio	Cat# GB21301; RRID:AB_2923552
mouse IgG - HRP conjugated (secondary)	Beijing Biodragon Immunotechnologies	Cat# BF03001; RRID:AB_3105782
rabbit IgG - HRP conjugated (secondary)	Beijing Biodragon Immunotechnologies	Cat# BF03008; RRID:AB_3073988
Flag Tag (7E1) Mouse mAb	Diagbio	Cat# db6490
beta Tubulin Rabbit pAb	Diagbio	Cat# db3285
mouse anti-RPA40	Santa Cruz	Cat# sc-374443; RRID:AB_10991310
InVivoMab anti mouse CD8α	Bioxcell	Cat# BE0061; RRID:AB_1125541
rabbit OTUD4 Antibody	Sigma Aldrich	Cat# HPA036623; RRID:AB_10696780
Chemicals and recombinant proteins
Silmitasertib(CX4945)	MedChemExpress	Cat# HY-50855
CX-5461	MedChemExpress	Cat# HY-13323
NSC348884	MedChemExpress	Cat# HY-13915
α-Amanitin	MedChemExpress	Cat# HY-19610
Nevirapine	MedChemExpress	Cat# HY-10570
Zidovudine	MedChemExpress	Cat# HY-17413
MG132	MedChemExpress	Cat# HY-13259
Actinomycin D	MedChemExpress	Cat# HY-17559
Cycloheximide	MedChemExpress	Cat# HY-12320
TCEP hydrochloride	MedChemExpress	Cat# HY-W011500
Protease and Phosphatase Inhibitor Cocktail (EDTA-Free, 10× in ddH2O)	MedChemExpress	Cat# HY-K0013
TRIzol reagent	Vazyme	Cat# R401-01
universal SYBR qPCR master mix	Vazyme	Cat# Q711-02
Flag M2 affinity gel	Sigma Aldrich	Cat# A2220
RNase A	Sigma-Aldrich	Cat# R6513
Collagenase/Dispase	Sigma-Aldrich	Cat# 10269638001
Murine IL-2	Peprotech	Cat# 212-12
HA beads	Abmart	Cat# M20031
Picogreen dsDNA Quantitation Reagent	Yeasen	Cat# 12641ES01
3x FLAG Peptide	Sigma-Aldrich	Cat# F4799
DMEM	Thermo Fisher Scientific	Cat# 11965092
RPMI	Thermo Fisher Scientific	Cat# 11875093
FBS	Thermo Fisher Scientific	Cat# A5256701
Puromycin	ThermoFisher Scientific	Cat# A11138-03
DAPI	Thermo Fisher Scientific	Cat# D1306
Antibiotic-antimycotic	Gibco	Cat# 15240112
Polybrene	Millipore	Cat# TR-1003-G
DNase I	Qiagen	Cat# 79254
4× Protein Native PAGE Loading Buffer	Beyotime	Cat# P0016N
PMSF	Beyotime	Cat# ST505
Recombinant OTUD4(1-300aa) protein	This paper	N/A
Critical commercial assays
HiScript II Q Select RT SuperMix	Vazyme	Cat# R232-01
AHA Alexa Fluor 488 Protein Synthesis HCS Assay	Thermo Fisher Scientific	Cat# 105125
Live/Dead Fixable Red Dead Cell Stain Kit	Thermo Fisher Scientific	Cat# L34971
Quant-iT PicoGreen dsDNA Assay Kit	Thermo Fisher Scientific	Cat# P7589
Mouse IL-2(Interleukin 2) ELISA Kit	Elabscienee	Cat# E-EL-M0042
Cyto-Fast Fix/Perm Buffer Set	BioLegend	Cat# 426803

## Sheet: Table7. ERV
Supplementary Table 10. OTUD4 depletion-mediated ERV alteration.
baseMean	log2FoldChange	lfcSE	stat	pvalue	padj	group	transcript_id	strand	TE.gene	class_id	family_id	family_id_new
12.2716	6.91897	1.30577	5.29877	1.16588e-07	1.08782e-05	Up	MER21C_chr16-97452209-97452441	+	MER21C	LTR	ERVL	ERVL
7.48169	6.20266	1.33982	4.62949	3.66572e-06	0.000196666	Up	L1MEc_chr16-97541871-97542435	-	L1MEc	LINE	L1	LINE
36.4366	6.03995	0.914703	6.60318	4.02436e-11	1.07954e-08	Up	MTC_chr16-97454325-97454700	+	MTC	LTR	ERVL-MaLR	ERVL
28.4576	5.67126	1.12426	5.04444	4.54863e-07	3.36599e-05	Up	MTB_chr16-97458166-97458531	+	MTB	LTR	ERVL-MaLR	ERVL
17.7032	5.54971	1.15717	4.79592	1.61926e-06	9.9284e-05	Up	ORR1E_chr16-97455766-97455932	+	ORR1E	LTR	ERVL-MaLR	ERVL
54.7474	5.39242	0.644258	8.36997	5.76346e-17	3.0921e-14	Up	MTD_chr16-97459782-97460166	-	MTD	LTR	ERVL-MaLR	ERVL
8.11136	5.32643	1.32672	4.01473	5.95144e-05	0.00216471	Up	RSINE1_chr16-97453739-97453879	+	RSINE1	SINE	B4	SINE
85.043	5.22769	0.533481	9.79921	1.13471e-22	8.11695e-20	Up	L1MEc_chr16-97458638-97459024	+	L1MEc	LINE	L1	LINE
28.2184	5.22671	0.861753	6.06521	1.31782e-09	2.60164e-07	Up	ORR1E_chr16-97546035-97546201	-	ORR1E	LTR	ERVL-MaLR	ERVL
13.3458	5.14385	1.12714	4.56362	5.02787e-06	0.0002569	Up	L1_Rod_chr16-97549084-97549369	-	L1_Rod	LINE	L1	LINE
7.02466	5.11107	1.33114	3.83963	0.00012322	0.00413662	Up	RLTR40_chr16-97445813-97446361	+	RLTR40	LTR	ERVK	ERVK
31.3507	5.03978	0.750026	6.71948	1.82376e-11	5.59112e-09	Up	L1MEc_chr16-97459549-97459782	+	L1MEc	LINE	L1	LINE
16.7757	4.88333	0.96701	5.04993	4.41972e-07	3.36599e-05	Up	L1Md_A_chr13-118996593-119000000	+	L1Md_A	LINE	L1	LINE
608.223	4.8568	0.272669	17.8121	5.69277e-71	1.22167e-67	Up	RMER19A_chr16-97447064-97447801	+	RMER19A	LTR	ERVK	ERVK
10.4846	4.80988	1.17535	4.09229	4.27129e-05	0.0016081	Up	B1_Mus1_chr16-97452999-97453145	+	B1_Mus1	SINE	Alu	SINE
18.795	4.60533	0.887328	5.19011	2.10172e-07	1.73473e-05	Up	RLTR1B_chr16-97457670-97458166	+	RLTR1B	LTR	ERV1	ERV1
18.0774	4.57281	0.841157	5.43633	5.43886e-08	5.83589e-06	Up	RLTR14_chr4-156207509-156207754	+	RLTR14	LTR	ERV1	ERV1
24.8672	4.42053	0.729063	6.0633	1.33355e-09	2.60164e-07	Up	L1MB3_chr16-97449242-97449562	+	L1MB3	LINE	L1	LINE
14.5746	4.34001	1.51526	2.8642	0.00418066	0.0575108	Not sig	B4A_chr4-156204799-156204960	-	B4A	SINE	B4	SINE
8.0138	3.75087	1.02886	3.64565	0.000266717	0.00724525	Up	L1M4_chr16-97460170-97460363	+	L1M4	LINE	L1	LINE
11.7679	3.64085	1.33129	2.73484	0.00624114	0.0739972	Not sig	MIRc_chr7-143847608-143847637	+	MIRc	SINE	MIR	SINE
46.6534	3.62741	0.484674	7.48423	7.19674e-14	3.08884e-11	Up	L1MB3_chr16-97559334-97559477	-	L1MB3	LINE	L1	LINE
26.2326	3.61268	0.606862	5.95306	2.63179e-09	4.34449e-07	Up	L1_Mur3_chr16-97548077-97548845	-	L1_Mur3	LINE	L1	LINE
20.4538	3.5216	0.632385	5.56876	2.56563e-08	3.23873e-06	Up	RLTR48A_chr4-156208766-156209343	+	RLTR48A	LTR	ERV1	ERV1
8.99049	3.50651	0.925653	3.78815	0.000151775	0.00488588	Up	B1_Mur3_chr16-97459095-97459229	+	B1_Mur3	SINE	Alu	SINE
12.5799	3.39322	0.761	4.45889	8.23836e-06	0.000384337	Up	RMER12B_chr4-154918799-154918932	-	RMER12B	LTR	ERVK	ERVK
21.3672	3.3883	0.632055	5.36077	8.28687e-08	8.4684e-06	Up	RLTR14_chr4-156208068-156208229	+	RLTR14	LTR	ERV1	ERV1
8.1591	3.34999	0.948005	3.53372	0.000409751	0.010345	Up	L1Md_F_chr9-118016494-118021716	-	L1Md_F	LINE	L1	LINE
33.8066	3.34896	0.812766	4.12045	3.78135e-05	0.00147541	Up	L1Md_F3_chr13-118988867-118993998	+	L1Md_F3	LINE	L1	LINE
8.75192	3.10252	0.891778	3.47902	0.000503244	0.0124134	Up	B1_Mur4_chr4-155411111-155411231	+	B1_Mur4	SINE	Alu	SINE
19.0453	3.07821	0.623224	4.93918	7.84524e-07	5.26121e-05	Up	L1M4_chr16-97540984-97541127	-	L1M4	LINE	L1	LINE
8.63003	3.07365	0.912402	3.36875	0.000755099	0.016669	Up	B1F_chr9-114465230-114465287	+	B1F	SINE	Alu	SINE
20.3776	3.06041	0.584208	5.23857	1.61824e-07	1.38909e-05	Up	L1M3_chr16-97553933-97554337	+	L1M3	LINE	L1	LINE
23.2257	3.02809	0.567531	5.33556	9.52506e-08	9.29127e-06	Up	ORR1E_chr16-97539470-97539794	-	ORR1E	LTR	ERVL-MaLR	ERVL
9.60913	2.96156	1.53349	1.93125	0.053452	0.261891	Not sig	MER21C_chr15-103153469-103153849	-	MER21C	LTR	ERVL	ERVL
28.8273	2.92102	0.533204	5.47825	4.29555e-08	4.85172e-06	Up	RLTR15_chr4-156205387-156205726	+	RLTR15	LTR	ERVK	ERVK
14.8487	2.82769	0.653615	4.32623	1.51685e-05	0.00066432	Up	RMER4B_chr4-156206876-156207366	+	RMER4B	LTR	ERVK	ERVK
9.92336	2.76855	0.777439	3.56111	0.000369286	0.00943437	Up	MTEa_chrX-169121410-169121778	-	MTEa	LTR	ERVL-MaLR	ERVL
22.5751	2.73757	0.550186	4.97573	6.50026e-07	4.49985e-05	Up	MTA_Mm_chr16-97552449-97552832	-	MTA_Mm	LTR	ERVL-MaLR	ERVL
27.3458	2.71617	0.530878	5.11637	3.11467e-07	2.47558e-05	Up	L1_Mus2_chr4-156198399-156198470	+	L1_Mus2	LINE	L1	LINE
10.5622	2.66599	0.747058	3.56865	0.000358829	0.00927768	Up	B1_Mus2_chr4-156198239-156198369	+	B1_Mus2	SINE	Alu	SINE
20.6535	2.57063	0.552827	4.64998	3.31967e-06	0.000187474	Up	RMER17C_chr16-97536510-97536989	-	RMER17C	LTR	ERVK	ERVK
7.6246	2.56137	1.36188	1.88076	0.0600048	0.27572	Not sig	L2c_chr4-148044287-148044379	-	L2c	LINE	L2	LINE
11.9421	2.52116	1.04747	2.40691	0.0160881	0.133512	Not sig	L1MC5a_chr4-155414662-155414907	-	L1MC5a	LINE	L1	LINE
7.22574	2.50025	0.841687	2.97052	0.00297292	0.0456759	Up	L1M2_chr16-97540878-97540925	-	L1M2	LINE	L1	LINE
74.7242	2.47309	0.66644	3.7109	0.000206525	0.00607126	Up	B1_Mur4_chr16-91563590-91563738	+	B1_Mur4	SINE	Alu	SINE
28.5932	2.46582	0.536113	4.59945	4.23615e-06	0.000221726	Up	LTR33A_chr19-56441694-56441976	-	LTR33A	LTR	ERVL	ERVL
11.0324	2.46366	1.17028	2.10519	0.035275	0.212717	Not sig	LTR41B_chr7-143848209-143848449	+	LTR41B	LTR	ERVL	ERVL
7.15621	2.44289	1.38667	1.7617	0.0781202	0.320547	Not sig	B3_chr4-150945060-150945106	-	B3	SINE	B2	SINE
7.09772	2.41565	0.871284	2.77252	0.00556241	0.0686031	Not sig	Lx8_chr13-116905877-116906118	+	Lx8	LINE	L1	LINE
296.877	2.40676	0.245299	9.81151	1.00453e-22	8.11695e-20	Up	RMER10A_chr7-143667595-143667910	-	RMER10A	LTR	ERVL	ERVL
10.5629	2.39862	0.71249	3.36653	0.000761215	0.016669	Up	RLTR31D_MM_chr17-94725683-94726032	+	RLTR31D_MM	LTR	ERVK	ERVK
6.75309	2.38625	0.880642	2.70967	0.00673496	0.0760696	Not sig	MIR3_chr9-118043032-118043157	-	MIR3	SINE	MIR	SINE
14.1015	2.35453	0.654588	3.59696	0.000321953	0.00863638	Up	B1_Mur2_chr6-143188764-143188874	+	B1_Mur2	SINE	Alu	SINE
8.96705	2.34838	0.759033	3.09391	0.00197535	0.0334422	Up	MIR3_chr9-118561193-118561281	+	MIR3	SINE	MIR	SINE
6.74556	2.34113	0.886352	2.64131	0.00825872	0.0899656	Not sig	L1MA5A_chr6-143200866-143201323	-	L1MA5A	LINE	L1	LINE
8.76439	2.3396	0.83534	2.80077	0.00509804	0.0647086	Not sig	B2_Mm1a_chr4-149293906-149294104	+	B2_Mm1a	SINE	B2	SINE
9.87521	2.32937	0.753024	3.09335	0.00197911	0.0334422	Up	B1_Mus2_chr6-146774372-146774499	+	B1_Mus2	SINE	Alu	SINE
19.498	2.29932	0.641873	3.58221	0.000340704	0.0090091	Up	RLTR25A_chr6-140747210-140747463	-	RLTR25A	LTR	ERVK	ERVK
6.65533	2.29266	0.882926	2.59667	0.00941334	0.0956772	Not sig	IAPEz-int_chrX-162979000-162985389	-	IAPEz-int	LTR	ERVK	ERVK
10.7314	2.2653	1.05098	2.15541	0.0311298	0.198823	Not sig	B1_Mm_chr7-144920359-144920467	+	B1_Mm	SINE	Alu	SINE
8.38205	2.24739	0.817789	2.74813	0.00599367	0.0718571	Not sig	B4A_chr7-145110432-145110571	-	B4A	SINE	B4	SINE
40.3503	2.24109	0.760589	2.94653	0.00321365	0.0478923	Up	L1Md_F2_chr4-156199459-156199545	-	L1Md_F2	LINE	L1	LINE
113.078	2.20782	0.953302	2.31597	0.02056	0.155886	Not sig	MuLV-int_chr4-147219403-147226971	+	MuLV-int	LTR	ERV1	ERV1
753.094	2.13708	0.434429	4.9193	8.6856e-07	5.64827e-05	Up	LFSINE_Vert_chr15-102485867-102486221	-	LFSINE_Vert	SINE	tRNA	SINE
6.87151	2.13612	0.818116	2.61102	0.00902723	0.0937854	Not sig	B3A_chr13-117007531-117007726	-	B3A	SINE	B2	SINE
12.5505	2.12574	0.654279	3.24899	0.00115817	0.0232284	Up	RMER15_chr4-156210130-156210656	+	RMER15	LTR	ERVL	ERVL
7.04655	2.12537	0.928917	2.28801	0.0221368	0.165149	Not sig	B1_Mur4_chr4-156182211-156182358	-	B1_Mur4	SINE	Alu	SINE
16.5071	2.12135	0.996545	2.12871	0.0332785	0.205979	Not sig	RSINE1_chr9-120124196-120124283	+	RSINE1	SINE	B4	SINE
8.84996	2.121	0.737884	2.87443	0.00404756	0.0564029	Not sig	L1Md_T_chr13-116937266-116938226	+	L1Md_T	LINE	L1	LINE
8.68585	2.11718	0.741697	2.8545	0.00431042	0.0588057	Not sig	B1_Mus1_chr6-143172816-143172925	-	B1_Mus1	SINE	Alu	SINE
11.6475	2.11513	0.660758	3.20106	0.00136923	0.0260032	Up	RMER4B_chr4-155411504-155412053	+	RMER4B	LTR	ERVK	ERVK
11.2733	2.10497	1.32065	1.59389	0.11096	0.379331	Not sig	B3_chr7-141438139-141438338	-	B3	SINE	B2	SINE
11.4406	2.09402	0.709494	2.95143	0.00316309	0.0475048	Up	B2_Mm1t_chr7-141516504-141516677	-	B2_Mm1t	SINE	B2	SINE
19.887	2.0844	0.567242	3.67463	0.000238194	0.00663851	Up	L1Md_F_chr8-129288603-129293158	+	L1Md_F	LINE	L1	LINE
10.0048	2.05534	0.786551	2.6131	0.00897246	0.0937854	Not sig	RMER10B_chr4-156188051-156188434	-	RMER10B	LTR	ERVL	ERVL
22.2359	2.04918	0.544709	3.76198	0.000168576	0.00524297	Up	PB1D7_chr6-147110071-147110148	-	PB1D7	SINE	Alu	SINE
10.2692	2.03762	0.700776	2.90766	0.00364147	0.0528014	Not sig	L1Md_F2_chr16-95712991-95713688	-	L1Md_F2	LINE	L1	LINE
8.43526	2.0265	0.76801	2.63864	0.00832404	0.0902192	Not sig	B4_chr6-143174911-143175081	+	B4	SINE	B4	SINE
10.7269	2.01238	0.701233	2.86977	0.00410769	0.0568717	Not sig	MLT1F1_chr9-122310761-122311020	-	MLT1F1	LTR	ERVL-MaLR	ERVL
13.8386	1.96159	0.660995	2.96763	0.00300108	0.0456759	Up	L1MC4_chr16-91017739-91018101	+	L1MC4	LINE	L1	LINE
7.11993	1.95871	0.894152	2.19058	0.0284825	0.190805	Not sig	B3A_chr13-116856530-116856737	+	B3A	SINE	B2	SINE
25.5837	1.94301	0.480793	4.04127	5.31636e-05	0.00196705	Up	Lx5c_chr11-121430030-121430378	-	Lx5c	LINE	L1	LINE
8.90432	1.9421	0.76533	2.5376	0.0111616	0.104597	Not sig	RMER15_chr6-140560851-140561358	-	RMER15	LTR	ERVL	ERVL
20.2245	1.93838	0.579637	3.34413	0.000825407	0.0175379	Up	B1_Mur4_chr6-143200549-143200642	-	B1_Mur4	SINE	Alu	SINE
13.8345	1.93139	1.21144	1.5943	0.11087	0.379331	Not sig	B1_Mus2_chr4-154921925-154922072	+	B1_Mus2	SINE	Alu	SINE
81.2455	1.8527	0.326312	5.67771	1.36509e-08	1.83093e-06	Up	L1_Mus2_chr4-154919999-154921453	+	L1_Mus2	LINE	L1	LINE
11.8757	1.83829	0.657297	2.79674	0.0051621	0.0647086	Not sig	L1VL2_chr16-93896117-93898720	+	L1VL2	LINE	L1	LINE
172.725	1.8368	0.304858	6.02508	1.69027e-09	3.02276e-07	Up	RMER10A_chr7-143637404-143637719	-	RMER10A	LTR	ERVL	ERVL
10.1888	1.83392	0.718536	2.5523	0.0107013	0.101231	Not sig	B1F_chr4-155716454-155716589	+	B1F	SINE	Alu	SINE
16.4637	1.81619	0.546463	3.32354	0.000888834	0.0185188	Up	Lx5c_chr16-97541132-97541376	-	Lx5c	LINE	L1	LINE
12.5985	1.7749	0.68756	2.58145	0.00983863	0.0975656	Not sig	B1_Mur4_chr16-96156989-96157096	-	B1_Mur4	SINE	Alu	SINE
195.844	1.76814	0.370436	4.77314	1.8138e-06	0.000108122	Up	L2a_chr7-141471383-141471462	+	L2a	LINE	L2	LINE
61.3242	1.7636	0.754201	2.33836	0.0193684	0.148977	Not sig	L1Md_F_chr16-98012933-98014399	+	L1Md_F	LINE	L1	LINE
75.6773	1.73671	0.329797	5.26599	1.39434e-07	1.24677e-05	Up	PB1D7_chr6-149317619-149317726	-	PB1D7	SINE	Alu	SINE
83.2021	1.72939	0.344344	5.02227	5.10644e-07	3.65281e-05	Up	B1F_chrX-167347523-167347666	-	B1F	SINE	Alu	SINE
53.2331	1.72616	0.810175	2.1306	0.033122	0.205979	Not sig	ID_B1_chr4-149896838-149897015	-	ID_B1	SINE	B4	SINE
103.86	1.72041	0.589886	2.91651	0.00353971	0.0519234	Not sig	B4_chr9-116088720-116088971	-	B4	SINE	B4	SINE
8.37597	1.7159	0.788091	2.17729	0.0294589	0.192292	Not sig	B3_chr15-102337933-102338123	+	B3	SINE	B2	SINE
22.831	1.69008	0.506057	3.33971	0.000838651	0.0176446	Up	B1_Mur2_chr6-143191305-143191454	+	B1_Mur2	SINE	Alu	SINE
14.6897	1.68518	0.652322	2.58335	0.00978455	0.0975656	Not sig	AmnSINE2_chr16-94502018-94502113	+	AmnSINE2	SINE	Deu	SINE
6.87862	1.67764	0.828534	2.02483	0.0428848	0.231815	Not sig	B2_Mm2_chr6-149317425-149317613	-	B2_Mm2	SINE	B2	SINE
53.2353	1.65419	0.372771	4.43756	9.09858e-06	0.000415437	Up	Lx8_chrX-164401533-164401844	-	Lx8	LINE	L1	LINE
12.9281	1.65157	0.600202	2.75168	0.005929	0.0714811	Not sig	MIR_chr16-93844946-93845038	-	MIR	SINE	MIR	SINE
7.41896	1.65081	0.76987	2.14427	0.0320111	0.203242	Not sig	MTEa_chr17-94723929-94724305	-	MTEa	LTR	ERVL-MaLR	ERVL
7.46309	1.64449	0.751965	2.18693	0.0287477	0.190999	Not sig	ORR1F_chr4-149372200-149372616	+	ORR1F	LTR	ERVL-MaLR	ERVL
8.34051	1.63303	0.794796	2.05465	0.0399132	0.224296	Not sig	Lx8_chr9-118043381-118043682	+	Lx8	LINE	L1	LINE
25.5057	1.63081	0.809969	2.01342	0.0440703	0.234677	Not sig	ORR1G_chr9-114748414-114748725	-	ORR1G	LTR	ERVL-MaLR	ERVL
89428.9	1.62812	0.394275	4.12941	3.63692e-05	0.00144534	Up	L1_Mus3_chr10-130000000-130000026	-	L1_Mus3	LINE	L1	LINE
7.44381	1.62799	0.784026	2.07645	0.0378522	0.219543	Not sig	L1MB7_chr4-151816370-151816787	-	L1MB7	LINE	L1	LINE
18.0411	1.612	0.537795	2.99743	0.0027227	0.0432808	Up	PB1D7_chr7-144579906-144580003	-	PB1D7	SINE	Alu	SINE
7.54716	1.60934	0.752448	2.1388	0.0324517	0.204828	Not sig	B4_chr19-58256183-58256389	-	B4	SINE	B4	SINE
18.6683	1.59658	0.552536	2.88955	0.00385796	0.0544683	Not sig	ORR1C1_chr4-156126945-156127316	+	ORR1C1	LTR	ERVL-MaLR	ERVL
10.5034	1.59387	1.36833	1.16483	0.244088	0.566897	Not sig	B1_Mur2_chr9-123069531-123069643	-	B1_Mur2	SINE	Alu	SINE
15.3679	1.59336	0.570029	2.79523	0.00518634	0.0647086	Not sig	B3_chr7-141408350-141408533	+	B3	SINE	B2	SINE
163387	1.59243	0.429937	3.70385	0.000212348	0.00615809	Up	B2_Mm2_chr11-121000000-121000043	-	B2_Mm2	SINE	B2	SINE
8.75261	1.58781	0.71822	2.21076	0.0270526	0.185038	Not sig	MTB-int_chr16-97942847-97944135	-	MTB-int	LTR	ERVL-MaLR	ERVL
21.1095	1.58294	0.875813	1.8074	0.0707	0.302383	Not sig	MTEa_chr4-155256369-155256711	+	MTEa	LTR	ERVL-MaLR	ERVL
8.61071	1.5782	0.764754	2.06368	0.0390485	0.223401	Not sig	B1_Mur1_chr7-141336670-141336827	+	B1_Mur1	SINE	Alu	SINE
8.16421	1.57355	1.19114	1.32105	0.186485	0.498376	Not sig	B1_Mus2_chr4-148078962-148079085	-	B1_Mus2	SINE	Alu	SINE
8.13197	1.55391	0.749707	2.07268	0.0382018	0.220973	Not sig	B3_chr17-94726105-94726265	+	B3	SINE	B2	SINE
17.9764	1.55262	0.550498	2.8204	0.00479644	0.0627632	Not sig	RodERV21-int_chr6-149305215-149306015	-	RodERV21-int	LTR	ERV1	ERV1
29.1908	1.54427	0.909204	1.69848	0.0894167	0.346995	Not sig	AmnSINE1_chr16-91506774-91506827	+	AmnSINE1	SINE	Deu	SINE
14.9177	1.54157	0.562079	2.74262	0.00609519	0.0726682	Not sig	B1_Mur1_chr6-143198356-143198485	+	B1_Mur1	SINE	Alu	SINE
8.52042	1.53334	0.692007	2.21578	0.0267063	0.184877	Not sig	RLTR17D_Mm_chr16-98028491-98029155	+	RLTR17D_Mm	LTR	ERVK	ERVK
141.554	1.53144	0.645318	2.37316	0.0176366	0.142953	Not sig	PB1D9_chr4-150945909-150946022	-	PB1D9	SINE	Alu	SINE
25.8127	1.52614	0.496742	3.07229	0.00212421	0.0352094	Up	B1_Mus1_chr15-103193249-103193395	+	B1_Mus1	SINE	Alu	SINE
8.53585	1.52492	0.762145	2.00082	0.0454116	0.237691	Not sig	L1Md_A_chr6-146740445-146740645	-	L1Md_A	LINE	L1	LINE
14.1847	1.5164	0.641913	2.36231	0.0181613	0.144814	Not sig	L1_Mus3_chr16-98014395-98015490	-	L1_Mus3	LINE	L1	LINE
12.6807	1.51548	0.6209	2.44078	0.0146554	0.125802	Not sig	ORR1D1_chr9-118051740-118052095	-	ORR1D1	LTR	ERVL-MaLR	ERVL
30.9488	1.50078	0.477081	3.14576	0.00165658	0.0298741	Up	L1Md_T_chr19-56410330-56415604	+	L1Md_T	LINE	L1	LINE
8.34792	1.4999	0.713828	2.1012	0.0356231	0.212717	Not sig	MIR_chr16-94651534-94651651	-	MIR	SINE	MIR	SINE
17.305	1.49841	0.51743	2.89587	0.00378109	0.0538734	Not sig	ORR1E_chr6-143208995-143209135	-	ORR1E	LTR	ERVL-MaLR	ERVL
17.1083	1.49762	0.551165	2.7172	0.00658367	0.07596	Not sig	ID_B1_chr6-146929193-146929317	-	ID_B1	SINE	B4	SINE
7.68087	1.49305	0.775695	1.92479	0.0542557	0.264294	Not sig	B3_chr1-195096263-195096469	-	B3	SINE	B2	SINE
8.30165	1.47886	0.787543	1.87781	0.0604071	0.276404	Not sig	Lx8_chr13-116906512-116906651	+	Lx8	LINE	L1	LINE
30.4106	1.47212	0.463381	3.17691	0.00148855	0.0275382	Up	PB1D9_chr18-90542840-90542925	+	PB1D9	SINE	Alu	SINE
9.9337	1.46484	0.705373	2.07669	0.0378304	0.219543	Not sig	B3_chr4-147914663-147914849	+	B3	SINE	B2	SINE
9.75293	1.45518	0.659351	2.20699	0.0273146	0.185818	Not sig	MLT1F1_chr4-156208352-156208485	+	MLT1F1	LTR	ERVL-MaLR	ERVL
8.96385	1.45509	1.16006	1.25433	0.209723	0.526391	Not sig	L1_Mus2_chr1-195144018-195149598	+	L1_Mus2	LINE	L1	LINE
18.9917	1.44647	0.494703	2.92392	0.00345652	0.0511564	Not sig	PB1D10_chr4-147945627-147945726	+	PB1D10	SINE	Alu	SINE
78.682	1.44115	0.770547	1.87029	0.0614433	0.277944	Not sig	L2_chr9-114459646-114459727	-	L2	LINE	L2	LINE
7.26004	1.44091	0.884578	1.62892	0.10333	0.369869	Not sig	L2a_chr19-57941482-57941857	-	L2a	LINE	L2	LINE
7.4355	1.40954	0.733403	1.92191	0.0546166	0.26505	Not sig	RMER4A_chr16-97999084-97999246	-	RMER4A	LTR	ERVK	ERVK
17.1262	1.40407	0.537641	2.61154	0.00901364	0.0937854	Not sig	L1_Mus3_chr4-155724391-155724905	-	L1_Mus3	LINE	L1	LINE
6.61764	1.39866	0.844041	1.6571	0.0974984	0.363881	Not sig	B3_chrX-162789217-162789413	+	B3	SINE	B2	SINE
7.26432	1.39789	0.760991	1.83693	0.0662202	0.291206	Not sig	B1_Mus2_chr16-91676347-91676465	+	B1_Mus2	SINE	Alu	SINE
23622.2	1.39777	0.495981	2.81819	0.00482949	0.0628127	Not sig	B1_Mus1_chr2-182000000-182000037	-	B1_Mus1	SINE	Alu	SINE
7.19765	1.39627	0.783729	1.78157	0.0748187	0.310871	Not sig	B2_Mm2_chr4-155500333-155500515	-	B2_Mm2	SINE	B2	SINE
8.1038	1.38928	0.738154	1.8821	0.0598223	0.27572	Not sig	ORR1B1_chr6-143199848-143199939	-	ORR1B1	LTR	ERVL-MaLR	ERVL
7.30074	1.38022	0.91673	1.50559	0.132171	0.416611	Not sig	B2_Mm2_chr4-152059849-152060035	+	B2_Mm2	SINE	B2	SINE
23.7535	1.37186	0.527916	2.59862	0.00935987	0.0956489	Not sig	RSINE1_chr11-121253378-121253497	+	RSINE1	SINE	B4	SINE
11.7425	1.36501	0.604275	2.25892	0.0238882	0.173595	Not sig	B3_chr3-159900705-159900905	-	B3	SINE	B2	SINE
8.53129	1.34883	0.833378	1.61851	0.105553	0.371	Not sig	RMER17C-int_chr7-143635171-143635374	-	RMER17C-int	LTR	ERVK	ERVK
7.71759	1.34102	0.752675	1.78168	0.0748019	0.310871	Not sig	B3_chr15-102508678-102508844	+	B3	SINE	B2	SINE
6.60691	1.32612	0.796905	1.66409	0.0960947	0.361537	Not sig	ORR1B2_chr6-149178679-149179060	+	ORR1B2	LTR	ERVL-MaLR	ERVL
15.9589	1.32569	0.592144	2.23879	0.0251693	0.178262	Not sig	RLTR44C_chr16-98026039-98026513	-	RLTR44C	LTR	ERVK	ERVK
6.57323	1.32209	0.802106	1.64828	0.0992953	0.364407	Not sig	B4A_chrX-169241982-169242268	+	B4A	SINE	B4	SINE
7.01088	1.31715	0.794632	1.65756	0.0974054	0.363881	Not sig	RMER10A_chr4-148082996-148083355	-	RMER10A	LTR	ERVL	ERVL
24.9788	1.30217	0.87647	1.48569	0.13736	0.422925	Not sig	PB1D11_chr11-121223186-121223282	-	PB1D11	SINE	Alu	SINE
10.3581	1.30182	1.24917	1.04215	0.297344	0.616719	Not sig	BGLII_Mus_chr17-94750749-94751175	-	BGLII_Mus	LTR	ERVK	ERVK
48.0686	1.29991	0.377952	3.43936	0.000583087	0.0134838	Up	PB1D11_chr15-103197309-103197387	-	PB1D11	SINE	Alu	SINE
28.6037	1.29953	0.440339	2.95119	0.00316551	0.0475048	Up	B4_chr6-145963211-145963484	+	B4	SINE	B4	SINE
9.82566	1.29595	0.676247	1.91638	0.0553164	0.266164	Not sig	B1F_chr19-56789517-56789638	-	B1F	SINE	Alu	SINE
16.1116	1.29555	0.582811	2.22292	0.0262209	0.183053	Not sig	MTEa_chr9-122309181-122309234	+	MTEa	LTR	ERVL-MaLR	ERVL
7.97532	1.29436	0.772069	1.67648	0.0936436	0.35631	Not sig	MIRb_chr13-116861356-116861415	-	MIRb	SINE	MIR	SINE
9.57385	1.28802	1.09026	1.18138	0.237451	0.560266	Not sig	Lx3_Mus_chr4-149000210-149000311	+	Lx3_Mus	LINE	L1	LINE
11.8405	1.28198	0.615281	2.08357	0.0371994	0.218712	Not sig	ID2_chr4-148151307-148151357	+	ID2	SINE	ID	SINE
7.21048	1.26978	1.53201	0.828831	0.4072	0.709871	Not sig	B1_Mur4_chr6-149325274-149325350	+	B1_Mur4	SINE	Alu	SINE
6.77023	1.26976	0.769011	1.65116	0.0987052	0.364407	Not sig	MIR_chr4-151790279-151790442	-	MIR	SINE	MIR	SINE
7.95378	1.26351	0.706233	1.78909	0.0736005	0.308573	Not sig	IAPEY4_I-int_chr16-90345438-90349546	-	IAPEY4_I-int	LTR	ERVK	ERVK
9.38988	1.26323	1.32911	0.950437	0.34189	0.651596	Not sig	B1_Mur4_chr16-87367705-87367851	+	B1_Mur4	SINE	Alu	SINE
136.821	1.25412	0.295472	4.24447	2.1911e-05	0.000921981	Up	RLTR42-int_chr6-143186496-143186587	+	RLTR42-int	LTR	ERVK	ERVK
13.5993	1.25026	0.596204	2.09703	0.0359907	0.21395	Not sig	B2_Mm2_chr16-87368314-87368501	+	B2_Mm2	SINE	B2	SINE
14.1831	1.24979	0.5739	2.1777	0.029428	0.192292	Not sig	B3A_chr4-148024496-148024719	-	B3A	SINE	B2	SINE
9.98967	1.249	0.662168	1.88623	0.0592635	0.274556	Not sig	L1Md_F2_chrX-169278961-169280147	+	L1Md_F2	LINE	L1	LINE
81.8113	1.24694	0.319119	3.90746	9.3271e-05	0.00333599	Up	RLTR42-int_chr6-143197423-143197512	+	RLTR42-int	LTR	ERVK	ERVK
18.9264	1.24525	0.836332	1.48894	0.136503	0.422707	Not sig	MIRb_chr9-116158302-116158461	+	MIRb	SINE	MIR	SINE
6.73997	1.24404	0.780607	1.59369	0.111007	0.379331	Not sig	MTE2a_chr6-146236031-146236418	-	MTE2a	LTR	ERVL-MaLR	ERVL
7.63764	1.23971	0.793902	1.56154	0.118396	0.392096	Not sig	ID_B1_chr9-114373583-114373744	-	ID_B1	SINE	B4	SINE
11.7842	1.23864	0.630744	1.96378	0.0495555	0.250816	Not sig	RLTR20B3_chr13-116982267-116982561	+	RLTR20B3	LTR	ERVK	ERVK
8.81706	1.23699	0.694882	1.78014	0.0750533	0.310935	Not sig	L1Md_F2_chr9-117951366-117955885	-	L1Md_F2	LINE	L1	LINE
7.53307	1.23681	0.734269	1.68441	0.0921028	0.353918	Not sig	RLTR17B_Mm_chr4-154349171-154349324	+	RLTR17B_Mm	LTR	ERVK	ERVK
10.2855	1.23643	0.706301	1.75057	0.0800198	0.325849	Not sig	RMER6C_chr6-149299623-149300330	-	RMER6C	LTR	ERVK	ERVK
28.9755	1.2297	0.446293	2.75535	0.00586287	0.0710832	Not sig	Lx4A_chrX-169098164-169098454	-	Lx4A	LINE	L1	LINE
10.5492	1.22707	0.641564	1.91262	0.0557968	0.267875	Not sig	Lx8_chr16-92816426-92816970	+	Lx8	LINE	L1	LINE
7.25592	1.22635	0.736167	1.66586	0.0957407	0.361089	Not sig	RSINE1_chr4-155814176-155814312	+	RSINE1	SINE	B4	SINE
11.5619	1.22359	0.61208	1.99908	0.0455999	0.238096	Not sig	RLTR19-int_chr7-143666209-143666383	-	RLTR19-int	LTR	ERVK	ERVK
13.9723	1.22112	0.552414	2.21051	0.0270695	0.185038	Not sig	ORR1D2_chr13-116942288-116942610	+	ORR1D2	LTR	ERVL-MaLR	ERVL
31.1249	1.22028	0.411157	2.96792	0.00299822	0.0456759	Up	B1F_chr3-159848534-159848658	+	B1F	SINE	Alu	SINE
28.4734	1.21999	0.454033	2.68701	0.00720941	0.0805802	Not sig	L2c_chr6-144999425-144999528	-	L2c	LINE	L2	LINE
7.23424	1.20556	0.765728	1.57439	0.115397	0.38592	Not sig	Lx5c_chrX-164380097-164381071	-	Lx5c	LINE	L1	LINE
29.1858	1.20481	0.444589	2.70994	0.00672963	0.0760696	Not sig	ID_B1_chr9-119392488-119392633	-	ID_B1	SINE	B4	SINE
25.7259	1.19909	0.46077	2.60236	0.00925846	0.0950654	Not sig	MLT1I_chr19-60554826-60555047	-	MLT1I	LTR	ERVL-MaLR	ERVL
14.1902	1.19709	0.586586	2.04077	0.0412736	0.227875	Not sig	Lx6_chrX-163951476-163951860	+	Lx6	LINE	L1	LINE
7.86179	1.19611	0.711214	1.68178	0.0926112	0.354267	Not sig	PB1D9_chr9-118042043-118042144	+	PB1D9	SINE	Alu	SINE
12.955	1.19463	0.599565	1.9925	0.0463167	0.240667	Not sig	B2_Mm1t_chr16-94454906-94455077	-	B2_Mm1t	SINE	B2	SINE
96.2624	1.19204	0.310479	3.83934	0.000123366	0.00413662	Up	MIRc_chr19-59297917-59298141	-	MIRc	SINE	MIR	SINE
10.4457	1.19127	0.650275	1.83195	0.0669595	0.293255	Not sig	L1Md_F2_chr1-195056688-195058506	-	L1Md_F2	LINE	L1	LINE
7.81896	1.18786	0.730033	1.62713	0.103709	0.369869	Not sig	BGLII_B_chr13-118374391-118375048	+	BGLII_B	LTR	ERVK	ERVK
9.92173	1.18535	1.0588	1.11952	0.26292	0.58348	Not sig	B3_chr4-155721848-155722055	-	B3	SINE	B2	SINE
14.3231	1.17778	0.631642	1.86463	0.0622326	0.279982	Not sig	L1_Mus3_chr6-149163324-149164643	-	L1_Mus3	LINE	L1	LINE
47.0391	1.17738	0.449056	2.6219	0.00874401	0.0932406	Not sig	L3b_chr16-91495212-91495251	+	L3b	LINE	CR1	LINE
7.88073	1.17372	0.759297	1.5458	0.122152	0.398907	Not sig	PB1D11_chr7-143576119-143576207	+	PB1D11	SINE	Alu	SINE
8.4132	1.16607	0.740158	1.57544	0.115156	0.38592	Not sig	B4_chr16-92787926-92788068	-	B4	SINE	B4	SINE
7.01219	1.1638	0.787323	1.47817	0.139362	0.424818	Not sig	B4_chr9-119005312-119005413	-	B4	SINE	B4	SINE
21.9935	1.16142	0.498249	2.331	0.0197535	0.150858	Not sig	B1_Mur4_chr6-145962936-145963082	+	B1_Mur4	SINE	Alu	SINE
7.20817	1.15924	1.23689	0.937228	0.348641	0.66094	Not sig	MER34A1_chr17-94723012-94723511	-	MER34A1	LTR	ERV1	ERV1
36.8259	1.15318	0.490339	2.35181	0.0186824	0.146859	Not sig	B3A_chr7-141331400-141331570	-	B3A	SINE	B2	SINE
8.40364	1.15126	0.699763	1.64522	0.0999252	0.364435	Not sig	RMER19B_chr4-154357079-154357979	-	RMER19B	LTR	ERVK	ERVK
308.781	1.13708	0.245273	4.63595	3.55295e-06	0.000195503	Up	RLTR42-int_chr6-143203486-143204361	+	RLTR42-int	LTR	ERVK	ERVK
8.29745	1.13451	0.701753	1.61669	0.105946	0.371504	Not sig	MTD_chr9-122295572-122295960	+	MTD	LTR	ERVL-MaLR	ERVL
10.1773	1.13295	0.666219	1.70056	0.0890252	0.346799	Not sig	B1_Mur2_chr4-150299001-150299117	+	B1_Mur2	SINE	Alu	SINE
25.2766	1.13248	0.463168	2.44507	0.0144824	0.124935	Not sig	MERVL_2A-int_chr9-118066906-118067987	-	MERVL_2A-int	LTR	ERVL	ERVL
21716.8	1.12979	0.306268	3.6889	0.000225228	0.00644452	Up	L1_Mus3_chr9-113000000-113000446	-	L1_Mus3	LINE	L1	LINE
6.90656	1.12921	0.808788	1.39617	0.162662	0.464822	Not sig	RMER15_chr6-149175910-149176335	+	RMER15	LTR	ERVL	ERVL
10.2228	1.1259	0.63615	1.76987	0.0767494	0.316131	Not sig	B4A_chr4-149933545-149933832	-	B4A	SINE	B4	SINE
9.0962	1.12561	0.690108	1.63106	0.102877	0.369869	Not sig	MTB_chr6-149312899-149313279	+	MTB	LTR	ERVL-MaLR	ERVL
15.9013	1.1251	0.5532	2.03381	0.0419706	0.229768	Not sig	B1_Mur1_chr16-96018615-96018752	-	B1_Mur1	SINE	Alu	SINE
32328.3	1.1235	0.344402	3.26218	0.00110559	0.0223829	Up	B4A_chr4-143000000-143000041	+	B4A	SINE	B4	SINE
6.97721	1.12336	0.874761	1.28419	0.199074	0.517834	Not sig	MLT1K_chr19-55506171-55506223	-	MLT1K	LTR	ERVL-MaLR	ERVL
6.97212	1.12336	0.749969	1.49788	0.134166	0.419362	Not sig	B2_Mm2_chr15-102236895-102237090	-	B2_Mm2	SINE	B2	SINE
24.4344	1.11878	0.551093	2.03011	0.0423453	0.230475	Not sig	L1Md_F2_chr1-195058530-195061506	-	L1Md_F2	LINE	L1	LINE
8.09185	1.11612	0.722667	1.54444	0.122481	0.398907	Not sig	B1_Mur1_chr6-143169535-143169651	-	B1_Mur1	SINE	Alu	SINE
10.1616	1.10257	0.645942	1.70692	0.0878375	0.345526	Not sig	B1F2_chr15-102428591-102428732	+	B1F2	SINE	Alu	SINE
11.0787	1.09665	0.665	1.6491	0.0991279	0.364407	Not sig	RSINE1_chr6-142234274-142234422	-	RSINE1	SINE	B4	SINE
40.5023	1.09593	0.402293	2.72421	0.00644558	0.0758609	Not sig	L1VL2_chr16-98026513-98028270	+	L1VL2	LINE	L1	LINE
8.92651	1.09126	0.736353	1.48199	0.138344	0.424731	Not sig	ID4__chr4-155622680-155622758	-	ID4_	SINE	ID	SINE
10.0824	1.08851	0.672686	1.61815	0.105629	0.371	Not sig	B1_Mur1_chr6-149310511-149310634	+	B1_Mur1	SINE	Alu	SINE
6.70601	1.08445	0.792306	1.36872	0.171087	0.477314	Not sig	L1_Mus2_chr4-154919082-154919670	+	L1_Mus2	LINE	L1	LINE
7.51243	1.0783	0.740636	1.45591	0.145419	0.437684	Not sig	B2_Mm2_chr9-119344953-119345140	-	B2_Mm2	SINE	B2	SINE
37.9409	1.07804	0.696628	1.54752	0.121739	0.398858	Not sig	MERVL-int_chr7-143635673-143636439	-	MERVL-int	LTR	ERVL	ERVL
9.58577	1.07654	0.636718	1.69076	0.090883	0.350782	Not sig	BGLII_B_chr4-147791078-147791514	+	BGLII_B	LTR	ERVK	ERVK
10.2494	1.06702	0.654939	1.62919	0.103273	0.369869	Not sig	B4A_chr19-60759128-60759268	+	B4A	SINE	B4	SINE
8.96289	1.06333	0.672015	1.5823	0.11358	0.384992	Not sig	MTC_chr16-84829638-84830058	-	MTC	LTR	ERVL-MaLR	ERVL
29.3763	1.06287	0.424482	2.50393	0.0122822	0.110283	Not sig	B3A_chr4-150063433-150063523	-	B3A	SINE	B2	SINE
8.1189	1.06178	0.780407	1.36054	0.173658	0.480245	Not sig	ORR1D1_chr9-121896661-121896987	-	ORR1D1	LTR	ERVL-MaLR	ERVL
42.2342	1.06098	1.10415	0.960898	0.336603	0.64843	Not sig	MIR_chr4-152284080-152284144	+	MIR	SINE	MIR	SINE
8.60301	1.05929	1.39223	0.760857	0.446743	0.742927	Not sig	MIRc_chr7-141342970-141343053	-	MIRc	SINE	MIR	SINE
12.3421	1.05777	0.585352	1.80707	0.070752	0.302383	Not sig	MT2B_chr13-116929305-116929818	+	MT2B	LTR	ERVL	ERVL
30.4087	1.05766	0.482223	2.1933	0.0282861	0.190672	Not sig	ORR1A3_chr1-195098659-195099001	-	ORR1A3	LTR	ERVL-MaLR	ERVL
69.2	1.0502	0.32432	3.23817	0.001203	0.0234695	Up	PB1D9_chr6-143189375-143189472	+	PB1D9	SINE	Alu	SINE
17.8994	1.04897	0.50652	2.07094	0.038364	0.221315	Not sig	L1VL2_chr16-98024904-98026039	+	L1VL2	LINE	L1	LINE
8.52463	1.04291	0.764559	1.36407	0.172545	0.478399	Not sig	MLT1A1_chr4-155584548-155584849	-	MLT1A1	LTR	ERVL-MaLR	ERVL
30.2904	1.04221	0.471161	2.21201	0.026966	0.185038	Not sig	PB1D7_chr4-154008168-154008288	+	PB1D7	SINE	Alu	SINE
34.3052	1.04161	0.460823	2.26033	0.023801	0.173595	Not sig	PB1D10_chr4-155622477-155622583	-	PB1D10	SINE	Alu	SINE
486.197	1.03941	0.297319	3.49594	0.000472395	0.0117879	Up	MIR3_chr9-120952743-120952875	-	MIR3	SINE	MIR	SINE
7.45143	1.03886	0.765483	1.35713	0.174739	0.481374	Not sig	B1_Mur1_chr7-143561398-143561540	-	B1_Mur1	SINE	Alu	SINE
7.98043	1.03792	0.727619	1.42646	0.153737	0.448869	Not sig	ORR1D2_chr16-90187681-90187974	+	ORR1D2	LTR	ERVL-MaLR	ERVL
103.875	1.03661	0.313961	3.30173	0.000960921	0.0198282	Up	B1_Mm_chr4-151047549-151047695	+	B1_Mm	SINE	Alu	SINE
14.2749	1.03383	0.561298	1.84185	0.0654967	0.289924	Not sig	B2_Mm1t_chr7-144977998-144978189	-	B2_Mm1t	SINE	B2	SINE
8.89616	1.02869	1.14159	0.901103	0.367534	0.678506	Not sig	L2_chr13-116847407-116847571	-	L2	LINE	L2	LINE
10.9169	1.02363	0.650592	1.57337	0.115632	0.38592	Not sig	Lx2B_chrX-169298857-169299447	-	Lx2B	LINE	L1	LINE
7.82159	1.02105	0.75222	1.35738	0.174659	0.481374	Not sig	RSINE1_chr6-146825389-146825546	+	RSINE1	SINE	B4	SINE
7.72824	1.0188	1.97304	0.516357	0.605605	0.852216	Not sig	ID_B1_chr4-147946396-147946522	-	ID_B1	SINE	B4	SINE
14.6014	1.00939	0.548082	1.84167	0.0655234	0.289924	Not sig	B2_Mm2_chr16-91507245-91507423	+	B2_Mm2	SINE	B2	SINE
8.2822	1.00584	0.691975	1.45357	0.146065	0.438462	Not sig	Lx2_chrX-169264816-169265123	-	Lx2	LINE	L1	LINE
30.187	1.00144	0.529206	1.89235	0.0584445	0.271663	Not sig	RMER6D_chr16-93839197-93839847	-	RMER6D	LTR	ERVK	ERVK
7.00543	0.995879	0.739404	1.34687	0.178023	0.484819	Not sig	MTE2a_chr16-91716981-91717354	+	MTE2a	LTR	ERVL-MaLR	ERVL
13.0036	0.993108	0.579083	1.71497	0.0863516	0.344234	Not sig	B2_Mm2_chr4-147823705-147823894	+	B2_Mm2	SINE	B2	SINE
9.06016	0.992169	0.68896	1.4401	0.14984	0.444567	Not sig	B4A_chr15-102348297-102348449	+	B4A	SINE	B4	SINE
7.17839	0.991049	0.781834	1.2676	0.204942	0.523211	Not sig	Lx8_chr15-102509575-102509836	+	Lx8	LINE	L1	LINE
8.59838	0.989312	0.72697	1.36087	0.173555	0.480245	Not sig	RMER6A_chr9-113745893-113746651	-	RMER6A	LTR	ERVK	ERVK
25.9253	0.986271	0.469539	2.10051	0.0356841	0.212717	Not sig	RMER6A_chr7-143594026-143594587	+	RMER6A	LTR	ERVK	ERVK
9.60681	0.980488	0.748444	1.31003	0.190184	0.50474	Not sig	L1MC4_chr16-94508387-94508583	+	L1MC4	LINE	L1	LINE
8.71503	0.979736	0.782514	1.25204	0.210556	0.526636	Not sig	RLTR17B_Mm_chr6-144072540-144072724	+	RLTR17B_Mm	LTR	ERVK	ERVK
11.2035	0.977661	0.636955	1.5349	0.124809	0.402767	Not sig	Lx2B_chr7-142029002-142029121	+	Lx2B	LINE	L1	LINE
16.3447	0.973751	0.563011	1.72954	0.0837123	0.338956	Not sig	B3A_chr16-91507051-91507156	+	B3A	SINE	B2	SINE
137.206	0.973706	0.344839	2.82365	0.004748	0.0625105	Not sig	L1Md_F2_chr16-98048363-98051914	-	L1Md_F2	LINE	L1	LINE
23.2024	0.967874	0.494403	1.95766	0.0502695	0.252642	Not sig	B1_Mur2_chr16-91563833-91563982	+	B1_Mur2	SINE	Alu	SINE
7.13622	0.96762	0.744967	1.29888	0.193986	0.508917	Not sig	B1_Mus2_chr4-155870672-155870746	-	B1_Mus2	SINE	Alu	SINE
6.69199	0.966231	0.815431	1.18493	0.236044	0.559107	Not sig	B3_chr9-122988046-122988254	+	B3	SINE	B2	SINE
10.4183	0.961556	0.64952	1.48041	0.138764	0.424818	Not sig	B4_chr16-92795877-92796140	-	B4	SINE	B4	SINE
9.6698	0.956505	0.631228	1.51531	0.129694	0.412331	Not sig	RMER15_chr4-145451436-145451733	+	RMER15	LTR	ERVL	ERVL
9.06345	0.954161	0.676007	1.41147	0.158107	0.454215	Not sig	L1_Mus2_chrX-169157427-169158133	+	L1_Mus2	LINE	L1	LINE
61.6396	0.9541	0.356312	2.67771	0.00741281	0.0819995	Not sig	L1VL4_chrX-163972305-163973893	+	L1VL4	LINE	L1	LINE
24.218	0.943602	0.479298	1.96872	0.0489857	0.248519	Not sig	ID4_chr15-103194164-103194228	+	ID4	SINE	ID	SINE
10.0575	0.943325	0.641446	1.47062	0.141393	0.427366	Not sig	B4A_chr15-102197720-102197941	-	B4A	SINE	B4	SINE
45.0176	0.941564	0.926681	1.01606	0.3096	0.626204	Not sig	B1F1_chr6-144999709-144999863	+	B1F1	SINE	Alu	SINE
275.5	0.940668	0.707697	1.3292	0.183783	0.495175	Not sig	L3_chr15-102081934-102082054	+	L3	LINE	CR1	LINE
36.0624	0.938985	0.448844	2.09201	0.0364377	0.215414	Not sig	ID_B1_chr6-149335209-149335349	+	ID_B1	SINE	B4	SINE
6.95123	0.938837	0.77432	1.21247	0.225334	0.548556	Not sig	L1_Mus2_chrX-169156460-169157429	-	L1_Mus2	LINE	L1	LINE
8.27535	0.936692	0.77003	1.21643	0.223819	0.548306	Not sig	PB1D9_chr6-149322862-149322976	+	PB1D9	SINE	Alu	SINE
13.1744	0.936064	0.599412	1.56164	0.118374	0.392096	Not sig	ORR1A2_chr16-92663086-92663381	+	ORR1A2	LTR	ERVL-MaLR	ERVL
16.2605	0.929907	0.519277	1.79077	0.0733296	0.30856	Not sig	RLTR20B3_chr6-144014326-144014741	+	RLTR20B3	LTR	ERVK	ERVK
6.87036	0.929722	0.778271	1.1946	0.232243	0.553771	Not sig	L1ME1_chr6-143987983-143988922	-	L1ME1	LINE	L1	LINE
9.22235	0.928708	0.669466	1.38724	0.16537	0.471292	Not sig	PB1D7_chr6-142392656-142392766	+	PB1D7	SINE	Alu	SINE
10.2007	0.928186	0.646043	1.43672	0.150797	0.444567	Not sig	B3_chr4-147913684-147913818	+	B3	SINE	B2	SINE
6.88731	0.919357	0.759287	1.21082	0.225966	0.548556	Not sig	RSINE1_chr6-147001901-147001966	-	RSINE1	SINE	B4	SINE
7.96392	0.918859	0.752397	1.22124	0.221994	0.54648	Not sig	RSINE1_chr13-116996855-116996984	+	RSINE1	SINE	B4	SINE
8.09096	0.912645	0.753388	1.21139	0.225747	0.548556	Not sig	B4_chr16-94454109-94454163	+	B4	SINE	B4	SINE
7.13291	0.910855	0.784848	1.16055	0.245825	0.567247	Not sig	MMVL30-int_chr4-143976143-143979844	-	MMVL30-int	LTR	ERV1	ERV1
55.6418	0.906934	0.374941	2.41887	0.0155687	0.132057	Not sig	RLTR19-int_chr9-123689317-123689427	-	RLTR19-int	LTR	ERVK	ERVK
73.1793	0.899945	0.411127	2.18897	0.0285989	0.190805	Not sig	L3b_chr7-143524691-143524752	+	L3b	LINE	CR1	LINE
11.219	0.896831	0.642686	1.39544	0.162883	0.464822	Not sig	ORR1D2_chr3-159938603-159938932	-	ORR1D2	LTR	ERVL-MaLR	ERVL
66.5875	0.896238	0.351179	2.55209	0.010708	0.101231	Not sig	L1Md_F2_chr9-121882590-121888569	-	L1Md_F2	LINE	L1	LINE
8.72184	0.896161	0.733027	1.22255	0.2215	0.546368	Not sig	PB1D10_chr7-143559991-143560093	-	PB1D10	SINE	Alu	SINE
7.18894	0.895764	0.79261	1.13014	0.258415	0.579477	Not sig	LTR16C_chr9-120119770-120120159	+	LTR16C	LTR	ERVL	ERVL
35.04	0.894782	0.391378	2.28624	0.0222405	0.165149	Not sig	MT2A_chr9-118069013-118069462	+	MT2A	LTR	ERVL	ERVL
43.0107	0.893943	0.46236	1.93344	0.0531825	0.261166	Not sig	B1F_chr6-145819042-145819176	+	B1F	SINE	Alu	SINE
6.8116	0.890505	0.809405	1.1002	0.271246	0.588569	Not sig	RSINE1_chr13-116948111-116948227	-	RSINE1	SINE	B4	SINE
35.6414	0.888721	0.426964	2.08149	0.0373893	0.218778	Not sig	IAPEz-int_chr16-98035575-98038928	+	IAPEz-int	LTR	ERVK	ERVK
10.1135	0.884384	0.646406	1.36816	0.171264	0.477314	Not sig	HAL1_chr16-94366484-94367069	-	HAL1	LINE	L1	LINE
71823.6	0.88198	0.351317	2.51049	0.0120563	0.109168	Not sig	Lx2B2_chr12-120000000-120000117	-	Lx2B2	LINE	L1	LINE
8.01906	0.881864	0.772928	1.14094	0.253895	0.575806	Not sig	B4_chr16-92737486-92737715	+	B4	SINE	B4	SINE
7.09159	0.87236	0.741091	1.17713	0.239144	0.560266	Not sig	B1_Mm_chr16-92663405-92663547	-	B1_Mm	SINE	Alu	SINE
11.9117	0.867305	0.582476	1.489	0.136488	0.422707	Not sig	B1_Mus1_chr6-146833006-146833157	-	B1_Mus1	SINE	Alu	SINE
8.36198	0.866891	0.782428	1.10795	0.267883	0.584225	Not sig	MTB_Mm_chr16-84953651-84954052	+	MTB_Mm	LTR	ERVL-MaLR	ERVL
31484.3	0.864996	0.275384	3.14106	0.00168339	0.0301045	Not sig	L1_Mur2_chr6-139000000-139000781	-	L1_Mur2	LINE	L1	LINE
10.9894	0.864709	0.599409	1.4426	0.149133	0.444567	Not sig	B1_Mus1_chr4-155621031-155621168	+	B1_Mus1	SINE	Alu	SINE
17.403	0.862364	0.523554	1.64713	0.0995303	0.364435	Not sig	L1_Mur3_chr9-120969848-120971224	+	L1_Mur3	LINE	L1	LINE
19.8218	0.861888	0.505457	1.70517	0.0881633	0.345526	Not sig	RLTR17C_Mm_chr6-149320797-149321081	+	RLTR17C_Mm	LTR	ERVK	ERVK
8.04258	0.859477	0.699674	1.2284	0.219298	0.542182	Not sig	L1MA6_chr16-92553580-92553886	-	L1MA6	LINE	L1	LINE
17.9145	0.858032	0.499802	1.71674	0.086026	0.343784	Not sig	B2_Mm2_chr4-149901953-149902134	+	B2_Mm2	SINE	B2	SINE
22.7537	0.857678	0.497712	1.72324	0.0848445	0.341677	Not sig	BGLII_Mur_chr1-194997204-194997653	-	BGLII_Mur	LTR	ERVK	ERVK
11.7568	0.85683	0.576063	1.48739	0.136912	0.422925	Not sig	RSINE1_chr6-147015008-147015173	+	RSINE1	SINE	B4	SINE
11.5029	0.849455	0.677988	1.25291	0.21024	0.526459	Not sig	L1Md_F2_chr15-103217946-103218393	+	L1Md_F2	LINE	L1	LINE
121.843	0.843537	0.360656	2.3389	0.0193407	0.148977	Not sig	ORR1B1_chr7-143668060-143668389	+	ORR1B1	LTR	ERVL-MaLR	ERVL
23.0648	0.840057	0.476123	1.76437	0.0776699	0.31931	Not sig	L1Md_F_chrX-168963490-168966800	+	L1Md_F	LINE	L1	LINE
99.2477	0.837928	0.330877	2.53244	0.0113271	0.105557	Not sig	ID_chr4-145215221-145215294	-	ID	SINE	ID	SINE
7.9119	0.836625	0.798964	1.04714	0.295036	0.615903	Not sig	ID_B1_chr9-123587597-123587652	-	ID_B1	SINE	B4	SINE
19.8912	0.834691	0.515019	1.6207	0.105082	0.371	Not sig	ORR1B1_chr16-98064427-98064759	-	ORR1B1	LTR	ERVL-MaLR	ERVL
7.45822	0.823842	0.711875	1.15729	0.247156	0.567269	Not sig	MLT-int_chr7-143346927-143348381	-	MLT-int	LTR	ERVL-MaLR	ERVL
13.0284	0.823502	0.566567	1.4535	0.146086	0.438462	Not sig	ORR1C1_chr7-144460002-144460263	+	ORR1C1	LTR	ERVL-MaLR	ERVL
10.3926	0.822154	0.651378	1.26217	0.206886	0.523538	Not sig	B1F_chr6-148771558-148771670	+	B1F	SINE	Alu	SINE
9.16996	0.81861	0.672803	1.21672	0.223712	0.548306	Not sig	B1_Mur2_chr7-142024912-142025063	+	B1_Mur2	SINE	Alu	SINE
10.1797	0.812159	0.623667	1.30223	0.192837	0.507765	Not sig	MTC_chr19-55276967-55277234	-	MTC	LTR	ERVL-MaLR	ERVL
7.01056	0.810691	0.778521	1.04132	0.297727	0.616719	Not sig	RSINE1_chr9-113909676-113909746	-	RSINE1	SINE	B4	SINE
9.96258	0.808499	0.621244	1.30142	0.193115	0.507873	Not sig	L1Md_F2_chrX-168852870-168859179	-	L1Md_F2	LINE	L1	LINE
8.03406	0.807207	1.12211	0.719367	0.471915	0.761451	Not sig	B1_Mur3_chr4-155524572-155524665	+	B1_Mur3	SINE	Alu	SINE
8.12864	0.801581	0.686456	1.16771	0.242924	0.565418	Not sig	L1MB5_chrX-169142458-169142774	+	L1MB5	LINE	L1	LINE
10.8587	0.79895	0.631711	1.26474	0.205965	0.523538	Not sig	L2_chr16-97859553-97859640	-	L2	LINE	L2	LINE
6.58128	0.797221	0.781733	1.01981	0.307817	0.624362	Not sig	Lx6_chr8-129226107-129226844	+	Lx6	LINE	L1	LINE
11.2893	0.794332	0.607325	1.30792	0.190901	0.505146	Not sig	MTE2a_chr6-149320183-149320499	-	MTE2a	LTR	ERVL-MaLR	ERVL
21.9768	0.793481	0.48847	1.62442	0.104286	0.370526	Not sig	RLTR6-int_chr11-121311592-121317617	-	RLTR6-int	LTR	ERV1	ERV1
14.7885	0.790822	0.575164	1.37495	0.169147	0.476991	Not sig	B1_Mur4_chrX-162763453-162763607	-	B1_Mur4	SINE	Alu	SINE
88.3372	0.78873	0.390065	2.02205	0.0431716	0.23278	Not sig	RMER10B_chr7-143665760-143666149	-	RMER10B	LTR	ERVL	ERVL
17.302	0.779349	0.499761	1.55944	0.118892	0.39313	Not sig	B1F1_chr4-150062725-150062874	-	B1F1	SINE	Alu	SINE
7.34567	0.777961	0.74639	1.0423	0.297273	0.616719	Not sig	L1Md_F2_chr16-87711380-87711834	-	L1Md_F2	LINE	L1	LINE
72.9946	0.777484	0.364488	2.13308	0.0329179	0.205953	Not sig	ORR1A3-int_chr1-195096830-195098659	-	ORR1A3-int	LTR	ERVL-MaLR	ERVL
6.68619	0.777326	0.783202	0.992497	0.320955	0.635934	Not sig	B2_Mm2_chrX-162764652-162764789	-	B2_Mm2	SINE	B2	SINE
8.95505	0.776831	0.680841	1.14099	0.253875	0.575806	Not sig	ORR1D1_chr4-145235025-145235402	+	ORR1D1	LTR	ERVL-MaLR	ERVL
21.3762	0.773354	0.477767	1.61869	0.105515	0.371	Not sig	MLT1C_chr16-92638091-92638287	+	MLT1C	LTR	ERVL-MaLR	ERVL
7.24886	0.772018	0.745324	1.03582	0.300288	0.618311	Not sig	B1F_chr16-91660965-91661104	-	B1F	SINE	Alu	SINE
6.98714	0.77029	0.747822	1.03004	0.302989	0.618663	Not sig	RMER17A2_chr16-98018778-98019348	+	RMER17A2	LTR	ERVK	ERVK
10.253	0.769985	0.72073	1.06834	0.285367	0.605629	Not sig	B4_chr4-150609534-150609773	+	B4	SINE	B4	SINE
13.0914	0.764579	0.568518	1.34486	0.178669	0.485961	Not sig	Lx2_chr7-142026807-142027051	+	Lx2	LINE	L1	LINE
358.159	0.764265	0.298989	2.55617	0.0105832	0.101231	Not sig	ID4_chr15-103196832-103196890	+	ID4	SINE	ID	SINE
9.76451	0.761206	0.646025	1.17829	0.23868	0.560266	Not sig	IAPEz-int_chr9-121406747-121413159	-	IAPEz-int	LTR	ERVK	ERVK
61.5871	0.758146	0.351082	2.15945	0.0308151	0.197401	Not sig	Lx5c_chrX-169149310-169150400	-	Lx5c	LINE	L1	LINE
10.7751	0.757545	0.625013	1.21205	0.225494	0.548556	Not sig	L1Md_F2_chr6-142363703-142364224	+	L1Md_F2	LINE	L1	LINE
37.6781	0.756964	0.422209	1.79287	0.0729943	0.307885	Not sig	MMETn-int_chr16-98031555-98035578	+	MMETn-int	LTR	ERVK	ERVK
13.4368	0.756871	0.569874	1.32814	0.184133	0.495175	Not sig	B3A_chr4-147882709-147882834	-	B3A	SINE	B2	SINE
29.4621	0.755647	0.417816	1.80856	0.0705189	0.302383	Not sig	MLTR18_MM_chr6-143173764-143174160	-	MLTR18_MM	LTR	ERVK	ERVK
30.247	0.752623	0.419834	1.79267	0.0730258	0.307885	Not sig	Lx8_chrX-169075472-169077137	-	Lx8	LINE	L1	LINE
12.445	0.751738	0.569023	1.3211	0.186467	0.498376	Not sig	MLT1C_chr4-150410696-150410848	-	MLT1C	LTR	ERVL-MaLR	ERVL
17.9141	0.746031	0.555523	1.34293	0.179293	0.48661	Not sig	RLTR28B_chr4-156025495-156025792	-	RLTR28B	LTR	ERVL	ERVL
13.3267	0.745823	0.615883	1.21098	0.225902	0.548556	Not sig	RMER4A_chr9-121852694-121853140	+	RMER4A	LTR	ERVK	ERVK
14.6908	0.741303	0.569032	1.30275	0.192662	0.507765	Not sig	L2a_chr19-60530496-60530571	+	L2a	LINE	L2	LINE
62.5383	0.740705	0.389568	1.90135	0.0572562	0.271124	Not sig	B3_chr16-92082893-92083064	+	B3	SINE	B2	SINE
38.877	0.740391	0.461294	1.60503	0.108488	0.376722	Not sig	L1Md_F2_chr9-124153530-124159656	-	L1Md_F2	LINE	L1	LINE
7.97971	0.739223	0.767465	0.963201	0.335447	0.647883	Not sig	L2b_chr13-119463868-119464157	-	L2b	LINE	L2	LINE
7.96509	0.738658	0.739829	0.998416	0.318078	0.633349	Not sig	Lx4B_chr8-129224965-129225693	+	Lx4B	LINE	L1	LINE
11.9745	0.738164	0.626943	1.1774	0.239035	0.560266	Not sig	RSINE1_chr4-147920569-147920732	-	RSINE1	SINE	B4	SINE
10.1928	0.73383	0.709038	1.03497	0.300685	0.618311	Not sig	B1_Mus2_chr15-103241680-103241821	+	B1_Mus2	SINE	Alu	SINE
6.97345	0.729285	0.807082	0.903608	0.366204	0.678506	Not sig	PB1D10_chr6-140630220-140630270	+	PB1D10	SINE	Alu	SINE
10.5986	0.728075	0.626491	1.16215	0.245176	0.567247	Not sig	RMER19B_chr4-156019441-156020287	+	RMER19B	LTR	ERVK	ERVK
33.1516	0.721115	0.428513	1.68283	0.0924076	0.354119	Not sig	RMER4A_chr7-144444420-144444889	+	RMER4A	LTR	ERVK	ERVK
9.58376	0.720745	0.654046	1.10198	0.270471	0.587558	Not sig	B1_Mur4_chr19-56589462-56589606	-	B1_Mur4	SINE	Alu	SINE
9.23512	0.715626	0.737417	0.970449	0.331823	0.646281	Not sig	B1F2_chr13-116982786-116982934	+	B1F2	SINE	Alu	SINE
25.2756	0.715162	0.452496	1.58048	0.113996	0.384992	Not sig	ID_B1_chr16-91425250-91425449	+	ID_B1	SINE	B4	SINE
8.2089	0.713616	0.696338	1.02481	0.305451	0.621326	Not sig	MER34A_chr1-195114186-195114463	-	MER34A	LTR	ERV1	ERV1
9.29648	0.713548	0.668036	1.06813	0.285463	0.605629	Not sig	Lx6_chr19-60937106-60938659	-	Lx6	LINE	L1	LINE
37.5059	0.712756	0.401188	1.77661	0.075632	0.312127	Not sig	B2_Mm1t_chr16-84719780-84719939	+	B2_Mm1t	SINE	B2	SINE
6.85782	0.712482	0.764564	0.93188	0.351399	0.662655	Not sig	L1Md_F3_chr17-94785760-94790951	+	L1Md_F3	LINE	L1	LINE
9.02439	0.712111	0.675297	1.05451	0.291647	0.612402	Not sig	B4_chr4-149899582-149899801	+	B4	SINE	B4	SINE
8.45972	0.710068	0.705004	1.00718	0.313847	0.628865	Not sig	L1_Mus3_chr16-91023679-91024310	+	L1_Mus3	LINE	L1	LINE
9.98858	0.709686	0.644059	1.1019	0.270506	0.587558	Not sig	L1Md_A_chr6-146895166-146895654	-	L1Md_A	LINE	L1	LINE
9.61931	0.704639	0.661829	1.06468	0.287019	0.60684	Not sig	MLT1J_chr9-118055021-118055121	-	MLT1J	LTR	ERVL-MaLR	ERVL
14.4695	0.703729	0.540362	1.30233	0.192804	0.507765	Not sig	B4A_chr6-143183330-143183591	+	B4A	SINE	B4	SINE
6.57751	0.703512	0.82656	0.851132	0.394696	0.698284	Not sig	RMER19A_chr4-151964340-151964722	+	RMER19A	LTR	ERVK	ERVK
14.2573	0.703436	0.54586	1.28867	0.197511	0.514442	Not sig	MERVL_2A-int_chr4-149152791-149152889	+	MERVL_2A-int	LTR	ERVL	ERVL
7.58288	0.701773	0.703849	0.99705	0.31874	0.633349	Not sig	B2_Mm1t_chr4-150338424-150338615	-	B2_Mm1t	SINE	B2	SINE
16.2464	0.700392	0.519895	1.34718	0.177922	0.484819	Not sig	B2_Mm2_chr6-149311737-149311920	-	B2_Mm2	SINE	B2	SINE
16.0537	0.697402	0.509228	1.36953	0.170834	0.477314	Not sig	MT2A_chr16-94378150-94378583	-	MT2A	LTR	ERVL	ERVL
19.2741	0.696953	0.490125	1.42199	0.155029	0.451187	Not sig	B2_Mm2_chr19-60198153-60198366	-	B2_Mm2	SINE	B2	SINE
8.04619	0.695199	0.701304	0.991295	0.321541	0.635934	Not sig	L1ME1_chrX-169124509-169124692	-	L1ME1	LINE	L1	LINE
10.6314	0.692018	0.60591	1.14211	0.253407	0.575806	Not sig	PB1D10_chr16-92071447-92071548	-	PB1D10	SINE	Alu	SINE
16.3943	0.689512	0.882085	0.781684	0.4344	0.731155	Not sig	L1Md_F2_chr13-116875994-116876239	+	L1Md_F2	LINE	L1	LINE
7.9562	0.686081	0.793304	0.864839	0.387127	0.694047	Not sig	RSINE1_chr4-149159200-149159308	+	RSINE1	SINE	B4	SINE
11.1751	0.68253	0.603419	1.1311	0.258011	0.579175	Not sig	B3_chr16-92770552-92770739	-	B3	SINE	B2	SINE
38.5094	0.681377	0.399336	1.70627	0.0879571	0.345526	Not sig	MTEa-int_chrX-168651559-168653078	-	MTEa-int	LTR	ERVL-MaLR	ERVL
14.8187	0.670308	0.589665	1.13676	0.255638	0.576448	Not sig	MTE-int_chr15-103192941-103193056	-	MTE-int	LTR	ERVL-MaLR	ERVL
70665.7	0.669686	0.358172	1.86973	0.0615207	0.277944	Not sig	L1_Mus3_chr8-129000000-129000315	+	L1_Mus3	LINE	L1	LINE
62.3104	0.666593	0.351342	1.89728	0.0577916	0.271124	Not sig	MuRRS-int_chrX-169138816-169140828	-	MuRRS-int	LTR	ERV1	ERV1
5375.97	0.662589	0.244037	2.71512	0.00662516	0.0760299	Not sig	L1Md_F2_chr1-193000000-193000744	+	L1Md_F2	LINE	L1	LINE
48.0014	0.660614	0.38849	1.70047	0.089043	0.346799	Not sig	MTD_chr9-123067779-123068124	-	MTD	LTR	ERVL-MaLR	ERVL
10.2942	0.659591	0.681654	0.967634	0.333227	0.647154	Not sig	Lx_chr9-117026988-117027700	-	Lx	LINE	L1	LINE
34.243	0.659401	0.393124	1.67733	0.0934771	0.356309	Not sig	ID_B1_chr6-143190341-143190511	+	ID_B1	SINE	B4	SINE
12.964	0.656215	0.614534	1.06782	0.2856	0.605629	Not sig	RMER6A_chr4-147774029-147774635	+	RMER6A	LTR	ERVK	ERVK
16.6871	0.654959	1.72618	0.379428	0.70437	0.903891	Not sig	B4A_chr4-145213726-145213991	+	B4A	SINE	B4	SINE
22.2196	0.653681	0.468193	1.39618	0.16266	0.464822	Not sig	B1_Mur1_chr15-102082745-102082885	-	B1_Mur1	SINE	Alu	SINE
9.43981	0.637994	2.19432	0.290747	0.771244	0.928472	Not sig	B4A_chr4-150292603-150292724	-	B4A	SINE	B4	SINE
6.75632	0.637045	0.775	0.821994	0.41108	0.714023	Not sig	ID_B1_chr9-116157539-116157665	-	ID_B1	SINE	B4	SINE
8.34888	0.635938	0.702125	0.905734	0.365077	0.678506	Not sig	Lx5c_chr9-118073452-118074683	+	Lx5c	LINE	L1	LINE
13.0751	0.634198	0.564542	1.12339	0.261274	0.581633	Not sig	ID_B1_chr15-103235820-103236000	-	ID_B1	SINE	B4	SINE
33.8546	0.631482	0.442382	1.42746	0.153448	0.448869	Not sig	L1VL1_chr6-146261843-146265694	-	L1VL1	LINE	L1	LINE
8.03416	0.631211	0.6816	0.926072	0.354409	0.667159	Not sig	B3_chr6-140534672-140534847	+	B3	SINE	B2	SINE
23.1653	0.629759	0.50241	1.25348	0.210032	0.526459	Not sig	B1F1_chr15-102480236-102480298	-	B1F1	SINE	Alu	SINE
13.6598	0.628174	0.616406	1.01909	0.30816	0.624408	Not sig	B4A_chr16-92820487-92820638	-	B4A	SINE	B4	SINE
8.29168	0.625824	0.812147	0.77058	0.440956	0.737561	Not sig	Lx8_chr6-146894517-146894639	+	Lx8	LINE	L1	LINE
10.6362	0.625667	0.611407	1.02332	0.306155	0.622167	Not sig	ORR1E_chr4-148022945-148023263	+	ORR1E	LTR	ERVL-MaLR	ERVL
7.26639	0.623752	0.730288	0.854118	0.393039	0.696623	Not sig	B1F_chr9-121724614-121724711	+	B1F	SINE	Alu	SINE
12.4937	0.621249	0.569394	1.09107	0.275242	0.592447	Not sig	RLTR17_chr9-113830697-113831218	-	RLTR17	LTR	ERVK	ERVK
14.5113	0.620453	0.615347	1.0083	0.313312	0.628555	Not sig	Lx7_chr3-159500005-159501333	-	Lx7	LINE	L1	LINE
13.2671	0.618391	0.573974	1.07738	0.281308	0.599491	Not sig	RSINE1_chr3-159913998-159914160	-	RSINE1	SINE	B4	SINE
7.47838	0.614368	1.20366	0.510419	0.609758	0.852987	Not sig	L1Md_F_chr16-98015456-98016275	-	L1Md_F	LINE	L1	LINE
6.98201	0.612817	0.823949	0.743756	0.457024	0.749876	Not sig	B3_chr16-96126881-96127032	-	B3	SINE	B2	SINE
17.304	0.609592	0.540026	1.12882	0.258974	0.580123	Not sig	B3_chr4-150597453-150597636	-	B3	SINE	B2	SINE
11.5903	0.608844	0.644556	0.944595	0.344865	0.655519	Not sig	ORR1A2_chr6-146823506-146823812	-	ORR1A2	LTR	ERVL-MaLR	ERVL
24.0118	0.607257	0.4786	1.26882	0.204506	0.523211	Not sig	L1Md_T_chr16-84719092-84719754	-	L1Md_T	LINE	L1	LINE
11.2439	0.60689	0.583678	1.03977	0.298448	0.617617	Not sig	L1MB5_chr4-149498051-149498337	-	L1MB5	LINE	L1	LINE
9.00763	0.603794	0.691605	0.873033	0.382645	0.691067	Not sig	MIRb_chr4-155094981-155095046	-	MIRb	SINE	MIR	SINE
22.1837	0.602176	0.551028	1.09282	0.274471	0.591975	Not sig	PB1D11_chr15-103194257-103194357	+	PB1D11	SINE	Alu	SINE
29.8055	0.601821	0.417626	1.44105	0.14957	0.444567	Not sig	L2_chr9-120941041-120941143	+	L2	LINE	L2	LINE
50.6897	0.597651	0.399972	1.49423	0.135115	0.419618	Not sig	Lx2_chrX-163973890-163975255	+	Lx2	LINE	L1	LINE
9.17273	0.595132	0.669452	0.888983	0.374012	0.681928	Not sig	L1_Mur3_chr9-117039147-117039423	-	L1_Mur3	LINE	L1	LINE
7.36033	0.594615	0.704649	0.843846	0.398755	0.702569	Not sig	Lx5c_chrX-168862137-168862656	-	Lx5c	LINE	L1	LINE
6.82943	0.59163	0.788341	0.750475	0.452969	0.747641	Not sig	RSINE1_chr4-148077599-148077729	-	RSINE1	SINE	B4	SINE
15.2365	0.591394	0.597296	0.99012	0.322115	0.635934	Not sig	ORR1A4-int_chr8-129217557-129218683	-	ORR1A4-int	LTR	ERVL-MaLR	ERVL
8.15966	0.589472	0.673686	0.874996	0.381576	0.69044	Not sig	IAP1-MM_I-int_chr1-194967680-194970228	-	IAP1-MM_I-int	LTR	ERVK	ERVK
10.3632	0.587574	0.649119	0.905187	0.365367	0.678506	Not sig	MTE2a_chr4-151788835-151789151	+	MTE2a	LTR	ERVL-MaLR	ERVL
12838.5	0.586843	0.209911	2.79567	0.00517918	0.0647086	Not sig	ID_B1_chrX-161000000-161000220	+	ID_B1	SINE	B4	SINE
7.54458	0.584285	0.73906	0.790578	0.42919	0.728887	Not sig	ID_B1_chr6-149187678-149187881	+	ID_B1	SINE	B4	SINE
6.54733	0.582593	0.783834	0.74326	0.457324	0.749876	Not sig	L2a_chr13-117673396-117673573	+	L2a	LINE	L2	LINE
41.7954	0.581589	0.855524	0.679805	0.496628	0.782869	Not sig	B3_chr4-150945127-150945286	-	B3	SINE	B2	SINE
9.59808	0.581063	0.66636	0.871996	0.38321	0.691067	Not sig	L2a_chr9-121720182-121720383	-	L2a	LINE	L2	LINE
27.9917	0.580727	0.450658	1.28862	0.197531	0.514442	Not sig	L1_Mus1_chr13-116931124-116933058	-	L1_Mus1	LINE	L1	LINE
20.1427	0.579781	0.565669	1.02495	0.305388	0.621326	Not sig	RSINE1_chr15-102481966-102482056	-	RSINE1	SINE	B4	SINE
9.36874	0.576685	0.665429	0.866636	0.386141	0.693534	Not sig	B3A_chr16-96029577-96029725	-	B3A	SINE	B2	SINE
17.5652	0.574107	0.487327	1.17807	0.238768	0.560266	Not sig	ORR1B1_chr16-98012377-98012710	+	ORR1B1	LTR	ERVL-MaLR	ERVL
22.7772	0.57098	0.468255	1.21938	0.2227	0.54744	Not sig	RMER10B_chr4-150599743-150600103	+	RMER10B	LTR	ERVL	ERVL
10.0634	0.566602	0.657653	0.861552	0.388934	0.694667	Not sig	MTC-int_chr15-103209442-103209852	+	MTC-int	LTR	ERVL-MaLR	ERVL
9.55842	0.561042	0.729622	0.768949	0.441924	0.737859	Not sig	B2_Mm2_chr16-90246800-90246988	+	B2_Mm2	SINE	B2	SINE
10.8605	0.560674	0.612226	0.915795	0.359774	0.673126	Not sig	MLT1L_chr4-150063259-150063402	-	MLT1L	LTR	ERVL-MaLR	ERVL
10.541	0.560305	0.623671	0.898398	0.368973	0.678506	Not sig	B1F_chr13-117020086-117020200	+	B1F	SINE	Alu	SINE
10.7888	0.55677	0.638346	0.872208	0.383095	0.691067	Not sig	B2_Mm2_chr4-150581607-150581799	-	B2_Mm2	SINE	B2	SINE
5590.01	0.556315	0.235587	2.3614	0.0182062	0.144814	Not sig	B2_Mm1t_chr15-102000000-102000058	-	B2_Mm1t	SINE	B2	SINE
13.1923	0.552315	0.575347	0.95997	0.33707	0.648648	Not sig	Lx7_chr9-113825313-113826497	-	Lx7	LINE	L1	LINE
9.57369	0.551781	1.57725	0.349838	0.72646	0.915489	Not sig	RMER20B_chr7-144454892-144455009	+	RMER20B	LTR	ERVK	ERVK
8.47121	0.549911	0.687821	0.799498	0.424002	0.727084	Not sig	RLTR15_chr7-143678313-143678663	+	RLTR15	LTR	ERVK	ERVK
7.81254	0.542302	0.777504	0.697491	0.485496	0.773156	Not sig	RSINE1_chr4-145146654-145146780	-	RSINE1	SINE	B4	SINE
22.1963	0.541897	0.511934	1.05853	0.289814	0.610943	Not sig	B2_Mm1a_chr4-148625554-148625742	+	B2_Mm1a	SINE	B2	SINE
9.45228	0.538499	0.758501	0.709951	0.477735	0.767379	Not sig	RLTR15_chr7-144920657-144920958	+	RLTR15	LTR	ERVK	ERVK
14.4244	0.538332	0.546066	0.985837	0.324213	0.638544	Not sig	B3A_chr4-155620813-155620973	+	B3A	SINE	B2	SINE
11.0612	0.537021	0.602038	0.892006	0.37239	0.680705	Not sig	Lx_chr16-91507426-91509003	-	Lx	LINE	L1	LINE
31667.6	0.535158	0.275875	1.93986	0.052397	0.259087	Not sig	B2_Mm2_chr7-141000000-141000137	+	B2_Mm2	SINE	B2	SINE
9566.07	0.532693	0.252154	2.11257	0.0346375	0.211171	Not sig	L1Md_F2_chr18-90000000-90000273	-	L1Md_F2	LINE	L1	LINE
7.11107	0.528356	0.841107	0.628168	0.529894	0.805349	Not sig	ORR1A4_chr16-84722224-84722530	+	ORR1A4	LTR	ERVL-MaLR	ERVL
21.0582	0.527924	0.449549	1.17434	0.240258	0.560995	Not sig	L1_Mur3_chr4-150064259-150064469	-	L1_Mur3	LINE	L1	LINE
18.2078	0.524393	0.481847	1.0883	0.276464	0.593886	Not sig	PB1D10_chr13-116951611-116951707	+	PB1D10	SINE	Alu	SINE
6.94822	0.523893	0.793186	0.660492	0.508938	0.790465	Not sig	RSINE1_chr6-146825943-146826088	+	RSINE1	SINE	B4	SINE
6.77337	0.523776	0.772775	0.677786	0.497907	0.782869	Not sig	B3A_chrX-169053204-169053413	+	B3A	SINE	B2	SINE
8.52076	0.522326	0.699836	0.746355	0.455453	0.748967	Not sig	B3_chr16-96020856-96021048	+	B3	SINE	B2	SINE
25.9592	0.518546	0.455857	1.13752	0.255321	0.576448	Not sig	Lx5_chr3-159929653-159930468	-	Lx5	LINE	L1	LINE
28.7628	0.518215	0.493284	1.05054	0.29347	0.614073	Not sig	RSINE1_chr4-149497531-149497692	+	RSINE1	SINE	B4	SINE
21.7677	0.517567	0.461667	1.12108	0.262252	0.582601	Not sig	ORR1A4-int_chr7-142045494-142047052	+	ORR1A4-int	LTR	ERVL-MaLR	ERVL
9.1223	0.517455	0.684224	0.756266	0.44949	0.745767	Not sig	Lx7_chr9-113826692-113827484	-	Lx7	LINE	L1	LINE
10.8594	0.516034	0.61615	0.837513	0.402304	0.705924	Not sig	L1Md_F2_chr15-103237322-103237405	+	L1Md_F2	LINE	L1	LINE
18.7699	0.507265	0.515725	0.983596	0.325314	0.639308	Not sig	ORR1A1-int_chr19-60830064-60830713	-	ORR1A1-int	LTR	ERVL-MaLR	ERVL
18.3368	0.506311	0.571614	0.885758	0.375748	0.684512	Not sig	B2_Mm1t_chr6-149321172-149321357	-	B2_Mm1t	SINE	B2	SINE
9.24628	0.503506	0.628407	0.801243	0.422991	0.726772	Not sig	B1_Mus2_chr17-94759934-94760080	+	B1_Mus2	SINE	Alu	SINE
13.3828	0.501134	0.563613	0.889146	0.373925	0.681928	Not sig	RSINE1_chrX-162773563-162773729	-	RSINE1	SINE	B4	SINE
8.29974	0.498971	0.720604	0.692435	0.488664	0.7745	Not sig	B3_chr7-142029643-142029819	-	B3	SINE	B2	SINE
15.8707	0.497404	0.518507	0.9593	0.337408	0.648648	Not sig	ORR1C2_chr6-145810770-145811066	-	ORR1C2	LTR	ERVL-MaLR	ERVL
23.8351	0.497375	0.454224	1.095	0.273518	0.591502	Not sig	Lx2_chr4-147794121-147795319	+	Lx2	LINE	L1	LINE
7263.34	0.496219	0.246142	2.01598	0.0438019	0.234411	Not sig	IAPEz-int_chr19-55000000-55000279	+	IAPEz-int	LTR	ERVK	ERVK
8.79084	0.495168	0.694212	0.713279	0.475673	0.765787	Not sig	ID_B1_chr15-102509195-102509402	+	ID_B1	SINE	B4	SINE
89.8022	0.491636	0.311813	1.5767	0.114864	0.38592	Not sig	RLTR20A4_chr3-159516933-159517028	+	RLTR20A4	LTR	ERVK	ERVK
21.0108	0.491292	0.506306	0.970346	0.331874	0.646281	Not sig	ORR1A4-int_chr9-123556581-123558652	-	ORR1A4-int	LTR	ERVL-MaLR	ERVL
14793.4	0.489406	0.241197	2.02907	0.0424513	0.230475	Not sig	MuRRS4-int_chr5-151000000-151000536	-	MuRRS4-int	LTR	ERV1	ERV1
6.65279	0.488713	0.792438	0.61672	0.537419	0.811042	Not sig	ID_B1_chr6-146810472-146810657	+	ID_B1	SINE	B4	SINE
8.71504	0.486761	0.660708	0.736726	0.461289	0.752223	Not sig	Lx6_chr8-129226846-129227230	+	Lx6	LINE	L1	LINE
15.1064	0.484701	0.539022	0.899225	0.368533	0.678506	Not sig	ID4__chr6-145757319-145757427	-	ID4_	SINE	ID	SINE
11.1242	0.484226	0.67286	0.719653	0.471739	0.761451	Not sig	L2a_chr19-56804047-56804279	-	L2a	LINE	L2	LINE
7.79771	0.48259	0.687182	0.702274	0.482508	0.770556	Not sig	L1MB8_chrX-169059913-169060463	+	L1MB8	LINE	L1	LINE
25.4495	0.481009	0.457871	1.05053	0.293473	0.614073	Not sig	B1_Mur1_chr15-103196304-103196445	-	B1_Mur1	SINE	Alu	SINE
8.50476	0.480055	0.723328	0.663676	0.506898	0.789782	Not sig	L1ME1_chr7-143203428-143204278	+	L1ME1	LINE	L1	LINE
7.18059	0.478864	0.843287	0.567854	0.570134	0.828426	Not sig	RMER17C_chr17-94808242-94808655	-	RMER17C	LTR	ERVK	ERVK
16.8359	0.477687	0.556793	0.857925	0.390934	0.695642	Not sig	Lx7_chrX-169096250-169097171	-	Lx7	LINE	L1	LINE
6.82231	0.475291	1.22462	0.388113	0.697933	0.903891	Not sig	MTD_chr15-102345788-102345959	-	MTD	LTR	ERVL-MaLR	ERVL
6.80281	0.473497	0.748381	0.632695	0.526933	0.803124	Not sig	B3_chr13-119443318-119443511	+	B3	SINE	B2	SINE
10.2795	0.471704	0.620225	0.760538	0.446933	0.742927	Not sig	B4_chr9-121899687-121899795	-	B4	SINE	B4	SINE
6.60702	0.471262	0.889314	0.529916	0.59617	0.844678	Not sig	B4_chr15-102587983-102588200	+	B4	SINE	B4	SINE
8.97026	0.465951	1.30238	0.357769	0.720517	0.913847	Not sig	B3_chr6-146826696-146826896	+	B3	SINE	B2	SINE
7.63039	0.463904	0.779648	0.595017	0.551832	0.821685	Not sig	B2_Mm1t_chr9-115260323-115260515	+	B2_Mm1t	SINE	B2	SINE
65.7501	0.460833	0.421052	1.09448	0.273745	0.591502	Not sig	L1Md_F2_chr4-147796431-147802584	-	L1Md_F2	LINE	L1	LINE
11.6789	0.459336	0.607634	0.755942	0.449684	0.745767	Not sig	B2_Mm2_chr16-92090762-92090947	-	B2_Mm2	SINE	B2	SINE
7.75048	0.456613	0.696495	0.655586	0.51209	0.79289	Not sig	BGLII_Mus_chr3-159905659-159905839	-	BGLII_Mus	LTR	ERVK	ERVK
9.21329	0.454639	0.707854	0.642279	0.520692	0.799861	Not sig	B3A_chr4-150515837-150515955	+	B3A	SINE	B2	SINE
20.091	0.451016	0.515145	0.875512	0.381296	0.69044	Not sig	L1_Mur3_chrX-169046196-169046783	+	L1_Mur3	LINE	L1	LINE
14.8344	0.448724	0.523608	0.856986	0.391453	0.695988	Not sig	ID_B1_chr9-123074706-123074850	-	ID_B1	SINE	B4	SINE
6.61689	0.447204	0.782958	0.571173	0.567882	0.827233	Not sig	MTC_chr4-154558688-154559081	+	MTC	LTR	ERVL-MaLR	ERVL
32.0353	0.447116	0.393925	1.13503	0.256364	0.576684	Not sig	B4A_chr16-94386961-94387213	+	B4A	SINE	B4	SINE
10.4454	0.445718	0.633429	0.703658	0.481646	0.770556	Not sig	B1_Mus1_chr6-143173286-143173428	+	B1_Mus1	SINE	Alu	SINE
36.3931	0.445643	0.42652	1.04484	0.296099	0.616322	Not sig	RMER10B_chr7-143634756-143635146	-	RMER10B	LTR	ERVL	ERVL
8.49296	0.443979	0.712477	0.623149	0.533187	0.807956	Not sig	L1_Mus3_chrX-169068057-169068873	-	L1_Mus3	LINE	L1	LINE
44.799	0.442451	0.397545	1.11296	0.265727	0.584225	Not sig	Lx3_Mus_chr17-94801692-94803199	-	Lx3_Mus	LINE	L1	LINE
11.8059	0.441999	0.611988	0.722235	0.47015	0.760318	Not sig	MTD_chr6-147003383-147003771	-	MTD	LTR	ERVL-MaLR	ERVL
9.87478	0.441126	0.677812	0.650809	0.51517	0.796509	Not sig	RSINE1_chrX-169973963-169974123	-	RSINE1	SINE	B4	SINE
22.2596	0.441107	0.477344	0.924085	0.355442	0.667932	Not sig	B4_chr16-92612270-92612481	-	B4	SINE	B4	SINE
13.499	0.440417	0.551621	0.798405	0.424636	0.727084	Not sig	B1_Mur4_chr16-96156668-96156807	-	B1_Mur4	SINE	Alu	SINE
6.94629	0.439139	0.793931	0.553119	0.580182	0.835057	Not sig	MLT1D_chr13-116974362-116974644	-	MLT1D	LTR	ERVL-MaLR	ERVL
20.0529	0.435566	0.477194	0.912767	0.361365	0.674926	Not sig	RLTR20A3_MM_chr15-103210698-103210936	+	RLTR20A3_MM	LTR	ERVK	ERVK
14.4265	0.435129	0.541462	0.803618	0.421617	0.725574	Not sig	L1MD_chr16-92110045-92110296	-	L1MD	LINE	L1	LINE
13.3641	0.42954	0.582609	0.737269	0.460959	0.752223	Not sig	B4A_chr4-155420549-155420809	+	B4A	SINE	B4	SINE
7.51972	0.42881	0.746849	0.574159	0.565861	0.826864	Not sig	ID_B1_chr16-92797317-92797509	-	ID_B1	SINE	B4	SINE
11.5485	0.426906	0.581735	0.733851	0.46304	0.753364	Not sig	B4_chr19-60758880-60759067	+	B4	SINE	B4	SINE
7.35604	0.426169	0.742609	0.573881	0.566048	0.826864	Not sig	L1Md_F2_chr6-142290467-142293984	-	L1Md_F2	LINE	L1	LINE
20.7996	0.425327	0.498044	0.853994	0.393108	0.696623	Not sig	Lx6_chrX-169116294-169118059	-	Lx6	LINE	L1	LINE
8.93036	0.42495	0.741888	0.572795	0.566783	0.826864	Not sig	RMER17D2_chr9-121439390-121440195	+	RMER17D2	LTR	ERVK	ERVK
6.56022	0.424675	0.771201	0.550668	0.581862	0.836353	Not sig	L1MC4_chr9-119454719-119454911	+	L1MC4	LINE	L1	LINE
112.913	0.416105	0.365137	1.13959	0.254459	0.575806	Not sig	L1_Mus1_chr16-98062162-98064203	-	L1_Mus1	LINE	L1	LINE
13.5466	0.415717	0.553852	0.750593	0.452897	0.747641	Not sig	Lx6_chr16-98005461-98006799	-	Lx6	LINE	L1	LINE
14.6295	0.412404	0.624442	0.660436	0.508974	0.790465	Not sig	MIRc_chr16-96066794-96066913	-	MIRc	SINE	MIR	SINE
47.0979	0.410878	0.36808	1.11627	0.264305	0.584225	Not sig	L2a_chr3-159907491-159908484	+	L2a	LINE	L2	LINE
161.961	0.410651	0.324187	1.26671	0.20526	0.523211	Not sig	B3_chr15-103196027-103196232	+	B3	SINE	B2	SINE
12.7389	0.409558	0.624717	0.655589	0.512089	0.79289	Not sig	L1VL1_chr6-146265724-146267352	-	L1VL1	LINE	L1	LINE
18.9186	0.408711	0.518882	0.787676	0.430886	0.72982	Not sig	ORR1C1_chr6-149322337-149322659	-	ORR1C1	LTR	ERVL-MaLR	ERVL
11.6876	0.402456	0.594402	0.677077	0.498357	0.782869	Not sig	ORR1D2_chr16-91394756-91395126	+	ORR1D2	LTR	ERVL-MaLR	ERVL
29.1783	0.39359	0.414875	0.948697	0.342775	0.652702	Not sig	RMER19B_chr4-150545662-150546492	-	RMER19B	LTR	ERVK	ERVK
7.17199	0.392319	0.785515	0.499442	0.617468	0.857736	Not sig	B2_Mm2_chr7-144449091-144449283	+	B2_Mm2	SINE	B2	SINE
24.6599	0.391677	0.461547	0.848617	0.396094	0.70018	Not sig	MTEb-int_chr4-149926496-149927904	-	MTEb-int	LTR	ERVL-MaLR	ERVL
20.4252	0.389826	0.477813	0.815856	0.414583	0.716917	Not sig	ORR1A4_chr7-142047624-142047939	+	ORR1A4	LTR	ERVL-MaLR	ERVL
46.927	0.38632	0.403689	0.956973	0.338581	0.64932	Not sig	RLTR42-int_chr6-143204342-143204397	+	RLTR42-int	LTR	ERVK	ERVK
12.2064	0.385911	0.640735	0.602295	0.546978	0.817989	Not sig	B3_chr16-96032226-96032337	-	B3	SINE	B2	SINE
8.41948	0.384171	0.682427	0.562948	0.57347	0.828426	Not sig	B2_Mm2_chr3-159887413-159887577	-	B2_Mm2	SINE	B2	SINE
11.1618	0.380164	1.2816	0.296631	0.766748	0.928472	Not sig	L1MD_chr4-153973904-153974068	+	L1MD	LINE	L1	LINE
25.5126	0.37835	0.483048	0.783256	0.433477	0.730969	Not sig	Lx8_chr4-150066752-150067339	-	Lx8	LINE	L1	LINE
22.2453	0.377679	0.473545	0.797556	0.425128	0.727084	Not sig	Lx10_chr9-113837938-113838509	-	Lx10	LINE	L1	LINE
13.8249	0.377267	0.610998	0.617459	0.536932	0.811042	Not sig	ORR1D1_chr4-150463553-150463838	-	ORR1D1	LTR	ERVL-MaLR	ERVL
14.9639	0.373876	0.535902	0.697657	0.485392	0.773156	Not sig	ORR1B2_chr6-146587732-146588037	-	ORR1B2	LTR	ERVL-MaLR	ERVL
13.8462	0.373709	0.579385	0.645009	0.518921	0.799456	Not sig	B1_Mur2_chr11-121266837-121266990	-	B1_Mur2	SINE	Alu	SINE
6.59604	0.373433	0.867863	0.43029	0.666985	0.886714	Not sig	L2a_chrX-162061662-162062203	+	L2a	LINE	L2	LINE
12.4711	0.369476	0.62948	0.586955	0.557234	0.824138	Not sig	L1_Rod_chr19-57852148-57853522	-	L1_Rod	LINE	L1	LINE
13.6512	0.368606	0.542991	0.678844	0.497237	0.782869	Not sig	L1M4_chr13-116888678-116889035	+	L1M4	LINE	L1	LINE
14.0052	0.368437	0.588222	0.626357	0.531081	0.806011	Not sig	B3A_chr19-55832736-55832917	+	B3A	SINE	B2	SINE
8.69651	0.364563	0.674702	0.540331	0.588969	0.841373	Not sig	Lx_chr16-92736678-92737191	+	Lx	LINE	L1	LINE
12.2881	0.364138	0.592879	0.614186	0.539092	0.811854	Not sig	MLT1H-int_chr6-147007004-147007247	-	MLT1H-int	LTR	ERVL-MaLR	ERVL
8.42602	0.359697	0.690712	0.520762	0.602532	0.849005	Not sig	MLTR25A_chr6-147067898-147068891	-	MLTR25A	LTR	ERVK	ERVK
6.88886	0.359314	0.748195	0.480241	0.631056	0.867883	Not sig	L1ME2_chr4-148978248-148979089	+	L1ME2	LINE	L1	LINE
7.66003	0.345441	0.710268	0.486353	0.626717	0.863798	Not sig	B1F1_chr19-55545151-55545272	+	B1F1	SINE	Alu	SINE
24.5678	0.342161	0.435731	0.785258	0.432302	0.730969	Not sig	B2_Mm2_chr4-155524010-155524160	+	B2_Mm2	SINE	B2	SINE
13.085	0.341282	0.667586	0.511219	0.609198	0.852987	Not sig	L1M2_chr9-114409369-114409554	-	L1M2	LINE	L1	LINE
12.4263	0.34012	0.573299	0.593268	0.553002	0.821844	Not sig	RLTR20C1_MM_chr13-116910326-116910402	+	RLTR20C1_MM	LTR	ERVK	ERVK
12.1364	0.338751	0.671708	0.504313	0.614042	0.855878	Not sig	L1_Mus3_chr1-195101402-195102876	+	L1_Mus3	LINE	L1	LINE
20.5546	0.336656	0.453024	0.743129	0.457404	0.749876	Not sig	ORR1B1_chr7-143637869-143638211	+	ORR1B1	LTR	ERVL-MaLR	ERVL
8.36823	0.335465	0.700359	0.47899	0.631946	0.867883	Not sig	MTD_chr13-119467260-119467585	-	MTD	LTR	ERVL-MaLR	ERVL
16.103	0.334046	0.5167	0.646499	0.517956	0.79909	Not sig	MT2B1_chr7-143516588-143517023	+	MT2B1	LTR	ERVL	ERVL
24.0795	0.329676	0.541532	0.608784	0.542667	0.814655	Not sig	RMER6A_chr9-123133464-123134218	-	RMER6A	LTR	ERVK	ERVK
7.24253	0.329477	0.714038	0.461428	0.644492	0.877588	Not sig	RLTR28_chr4-152251552-152252058	-	RLTR28	LTR	ERVL	ERVL
7.15997	0.329376	0.736592	0.447162	0.654758	0.882729	Not sig	L1_Mus1_chrX-169293359-169293840	+	L1_Mus1	LINE	L1	LINE
7.57762	0.329084	0.711245	0.462687	0.643589	0.877098	Not sig	MTB_chr6-146562509-146562884	+	MTB	LTR	ERVL-MaLR	ERVL
6.76923	0.325843	0.843943	0.386095	0.699426	0.903891	Not sig	B4A_chr4-149916041-149916205	-	B4A	SINE	B4	SINE
13.6743	0.324405	0.537865	0.603134	0.546419	0.817724	Not sig	ID_B1_chr1-195105204-195105269	-	ID_B1	SINE	B4	SINE
8.7589	0.319776	0.664367	0.481324	0.630286	0.867604	Not sig	MIRb_chr13-119465207-119465283	-	MIRb	SINE	MIR	SINE
10.0582	0.318569	0.64159	0.49653	0.61952	0.857736	Not sig	Lx5b_chr11-121583207-121585272	-	Lx5b	LINE	L1	LINE
8.41578	0.315641	0.687315	0.459238	0.646063	0.877784	Not sig	B3_chr9-119299619-119299803	-	B3	SINE	B2	SINE
11.5649	0.315203	0.596117	0.52876	0.596972	0.845054	Not sig	ORR1A0_chr13-119464475-119464812	-	ORR1A0	LTR	ERVL-MaLR	ERVL
9.45614	0.311504	0.61549	0.506108	0.612781	0.855343	Not sig	RMER4B_chr9-122246420-122246994	+	RMER4B	LTR	ERVK	ERVK
23.6709	0.309343	0.545299	0.567291	0.570517	0.828426	Not sig	L1M2_chr15-102531436-102531669	+	L1M2	LINE	L1	LINE
8.97153	0.308784	0.672214	0.459354	0.64598	0.877784	Not sig	B3A_chr4-150064694-150064776	+	B3A	SINE	B2	SINE
8.93891	0.307191	0.684772	0.448603	0.653718	0.882313	Not sig	LFSINE_Vert_chr4-152299216-152299295	-	LFSINE_Vert	SINE	tRNA	SINE
11.3871	0.306517	0.576848	0.531366	0.595165	0.844167	Not sig	MIR_chr6-143171822-143171922	+	MIR	SINE	MIR	SINE
30.2567	0.30632	0.44485	0.68859	0.491081	0.777756	Not sig	B1_Mus1_chr15-103356524-103356657	+	B1_Mus1	SINE	Alu	SINE
15.8012	0.305079	0.519071	0.587741	0.556706	0.823926	Not sig	MTC_chr9-113823870-113824230	-	MTC	LTR	ERVL-MaLR	ERVL
28.615	0.303795	0.430299	0.706009	0.480182	0.770556	Not sig	MTD_chr16-94615185-94615375	+	MTD	LTR	ERVL-MaLR	ERVL
10.8656	0.30125	0.658037	0.457801	0.647096	0.877892	Not sig	MTC_chr13-116915443-116915851	+	MTC	LTR	ERVL-MaLR	ERVL
7.15987	0.293881	0.774854	0.379273	0.704485	0.903891	Not sig	Lx8_chr9-119912697-119912858	-	Lx8	LINE	L1	LINE
14.6622	0.293679	0.579286	0.506968	0.612178	0.855295	Not sig	B1_Mus1_chr3-159845672-159845814	+	B1_Mus1	SINE	Alu	SINE
39.0716	0.291804	0.393905	0.740799	0.458815	0.751044	Not sig	ORR1E-int_chr6-145809504-145810617	-	ORR1E-int	LTR	ERVL-MaLR	ERVL
11.8552	0.290605	0.595757	0.487791	0.625698	0.863798	Not sig	L2_chr4-148078191-148078272	+	L2	LINE	L2	LINE
13.509	0.283412	0.549745	0.515535	0.60618	0.852247	Not sig	RLTR17B_Mm_chr6-146829335-146829512	-	RLTR17B_Mm	LTR	ERVK	ERVK
8.13051	0.283141	0.665496	0.425458	0.670502	0.888222	Not sig	ORR1F_chr4-154437294-154437616	+	ORR1F	LTR	ERVL-MaLR	ERVL
9.90612	0.282551	0.634438	0.445356	0.656063	0.882729	Not sig	BGLII_B_chr19-61098448-61098846	-	BGLII_B	LTR	ERVK	ERVK
21.0851	0.281324	0.447726	0.62834	0.529781	0.805349	Not sig	B1_Mus1_chr15-102480360-102480507	-	B1_Mus1	SINE	Alu	SINE
20.034	0.28081	0.547178	0.513197	0.607814	0.852528	Not sig	L2a_chrX-169276286-169277263	+	L2a	LINE	L2	LINE
10.3574	0.280688	0.646327	0.434281	0.664084	0.886714	Not sig	L1_Mus3_chr15-102473781-102473912	-	L1_Mus3	LINE	L1	LINE
36.3528	0.27619	0.419141	0.658944	0.509932	0.790766	Not sig	MLT1C_chr4-155504349-155504681	-	MLT1C	LTR	ERVL-MaLR	ERVL
18.1388	0.274325	0.559234	0.490537	0.623754	0.862222	Not sig	ORR1C1_chr9-114586156-114586463	+	ORR1C1	LTR	ERVL-MaLR	ERVL
8.99894	0.27368	0.634771	0.431147	0.666361	0.886714	Not sig	ORR1E-int_chr6-145809071-145809468	-	ORR1E-int	LTR	ERVL-MaLR	ERVL
6.81867	0.270911	0.857282	0.316012	0.751993	0.922902	Not sig	L1Md_F2_chr4-143137882-143138866	+	L1Md_F2	LINE	L1	LINE
7.33079	0.269625	0.76386	0.352977	0.724106	0.914709	Not sig	ID_B1_chr6-146590717-146590805	+	ID_B1	SINE	B4	SINE
7.31457	0.267594	0.761433	0.351435	0.725262	0.915117	Not sig	B1_Mus2_chr4-149768642-149768784	+	B1_Mus2	SINE	Alu	SINE
3403.94	0.25868	0.197722	1.3083	0.190772	0.505146	Not sig	MusHAL1_chr3-159000000-159000968	+	MusHAL1	LINE	L1	LINE
7.97037	0.258497	0.695466	0.37169	0.710124	0.907099	Not sig	B4A_chr4-149355727-149356013	-	B4A	SINE	B4	SINE
9.30685	0.257846	0.678441	0.380057	0.703903	0.903891	Not sig	Lx5c_chr6-142769439-142769786	-	Lx5c	LINE	L1	LINE
7.51581	0.255682	1.26036	0.202864	0.839241	0.960494	Not sig	B2_Mm2_chr6-146296265-146296457	+	B2_Mm2	SINE	B2	SINE
29.1499	0.254506	0.428049	0.594573	0.552129	0.821685	Not sig	RMER17C_chr15-103215956-103216350	-	RMER17C	LTR	ERVK	ERVK
113.467	0.254234	0.329264	0.772129	0.440038	0.7366	Not sig	L2b_chr15-102204958-102205098	-	L2b	LINE	L2	LINE
11.7197	0.252299	0.585663	0.430793	0.666619	0.886714	Not sig	Lx4B_chr17-94824508-94825240	+	Lx4B	LINE	L1	LINE
8.97726	0.251651	0.648929	0.387793	0.698169	0.903891	Not sig	MIRb_chrX-162094372-162094534	+	MIRb	SINE	MIR	SINE
6.78724	0.249029	0.82938	0.300259	0.763979	0.927074	Not sig	ORR1A2_chr4-148048626-148048951	+	ORR1A2	LTR	ERVL-MaLR	ERVL
19.9513	0.248085	0.486194	0.510259	0.60987	0.852987	Not sig	IAP1-MM_LTR_chr4-152230394-152230651	-	IAP1-MM_LTR	LTR	ERVK	ERVK
25.0658	0.245606	0.425451	0.577284	0.563748	0.826368	Not sig	B3A_chr4-155529020-155529205	+	B3A	SINE	B2	SINE
8.74845	0.240031	1.34601	0.178328	0.858465	0.962301	Not sig	PB1D7_chr15-103358223-103358297	-	PB1D7	SINE	Alu	SINE
7.23803	0.239764	0.723917	0.331203	0.740491	0.921022	Not sig	B1_Mur3_chr4-155816878-155817030	+	B1_Mur3	SINE	Alu	SINE
8.35598	0.239272	0.739496	0.323561	0.74627	0.921784	Not sig	L1Md_F2_chr3-159859086-159859479	+	L1Md_F2	LINE	L1	LINE
8.63017	0.234441	0.701314	0.334288	0.738162	0.920648	Not sig	MTD_chr15-102520028-102520308	-	MTD	LTR	ERVL-MaLR	ERVL
11.0997	0.233652	0.576032	0.405622	0.68502	0.899115	Not sig	B4A_chr16-93834783-93835028	+	B4A	SINE	B4	SINE
11.1734	0.22896	0.605972	0.37784	0.70555	0.903946	Not sig	B2_Mm1t_chr11-121149636-121149812	-	B2_Mm1t	SINE	B2	SINE
6.82631	0.228465	0.794131	0.287692	0.773582	0.928472	Not sig	B1_Mur1_chr4-150491593-150491740	+	B1_Mur1	SINE	Alu	SINE
7.14795	0.224754	0.735219	0.305697	0.759836	0.926132	Not sig	ID_B1_chr9-114427828-114428015	-	ID_B1	SINE	B4	SINE
9.19498	0.223643	0.655584	0.341136	0.733001	0.919363	Not sig	L1_Mur3_chr16-92095821-92096085	+	L1_Mur3	LINE	L1	LINE
103.501	0.223041	0.327456	0.681133	0.495787	0.782869	Not sig	RSINE1_chr4-145213525-145213692	-	RSINE1	SINE	B4	SINE
9.51862	0.221921	0.634957	0.349505	0.72671	0.915489	Not sig	LTRIS6_chrX-169141014-169141312	-	LTRIS6	LTR	ERV1	ERV1
6.88198	0.22034	0.735961	0.299391	0.764641	0.927074	Not sig	RLTR23_chrX-168897598-168898060	+	RLTR23	LTR	ERV1	ERV1
17.4548	0.217636	0.491336	0.442949	0.657803	0.883368	Not sig	B3_chr4-152257924-152258097	+	B3	SINE	B2	SINE
19.5015	0.213892	0.472624	0.452563	0.650864	0.881233	Not sig	L1_Mus2_chr9-121727491-121727918	+	L1_Mus2	LINE	L1	LINE
9.4932	0.212908	0.754253	0.282277	0.777731	0.929748	Not sig	IAPEY_LTR_chr6-140451329-140451713	-	IAPEY_LTR	LTR	ERVK	ERVK
15.5611	0.211337	0.519977	0.406435	0.684423	0.898888	Not sig	L1MC_chr6-144113620-144115490	+	L1MC	LINE	L1	LINE
8.99091	0.211105	0.703233	0.300192	0.764031	0.927074	Not sig	L1MC3_chr4-151802027-151802322	+	L1MC3	LINE	L1	LINE
15.4821	0.210801	0.564096	0.373697	0.70863	0.906799	Not sig	B4A_chr16-91748834-91749022	+	B4A	SINE	B4	SINE
12.9165	0.210398	0.54857	0.383538	0.701321	0.903891	Not sig	B4A_chr4-150318211-150318472	+	B4A	SINE	B4	SINE
7.97129	0.209354	0.672028	0.311526	0.755401	0.925064	Not sig	MIR3_chr19-60789701-60789788	+	MIR3	SINE	MIR	SINE
8.71189	0.205617	0.699601	0.293906	0.76883	0.928472	Not sig	B1_Mus1_chr4-149363110-149363251	-	B1_Mus1	SINE	Alu	SINE
11.8687	0.205395	0.616873	0.332961	0.739164	0.920648	Not sig	PB1D7_chr11-121287472-121287593	+	PB1D7	SINE	Alu	SINE
14.4898	0.202507	0.535076	0.378465	0.705085	0.903891	Not sig	B1_Mur4_chrX-169311774-169311898	-	B1_Mur4	SINE	Alu	SINE
12.2934	0.200437	0.555395	0.36089	0.718182	0.913044	Not sig	B2_Mm1a_chr4-151941343-151941479	-	B2_Mm1a	SINE	B2	SINE
12.8376	0.199473	0.556121	0.358687	0.719829	0.913515	Not sig	PB1D10_chr13-116922221-116922336	-	PB1D10	SINE	Alu	SINE
41.2862	0.197677	0.366729	0.539027	0.589868	0.84166	Not sig	MLT1B_chr4-154601950-154602235	+	MLT1B	LTR	ERVL-MaLR	ERVL
12.7017	0.195936	0.561081	0.349211	0.726931	0.915489	Not sig	MTEa_chr6-145806248-145806535	+	MTEa	LTR	ERVL-MaLR	ERVL
8.41977	0.195895	0.679673	0.28822	0.773178	0.928472	Not sig	B2_Mm2_chr4-150367219-150367415	-	B2_Mm2	SINE	B2	SINE
15.2563	0.195552	0.51626	0.378787	0.704846	0.903891	Not sig	L1MA6_chr13-116900677-116901052	+	L1MA6	LINE	L1	LINE
10.3072	0.194846	0.597997	0.325831	0.744552	0.921707	Not sig	ID_B1_chr6-143169961-143170026	+	ID_B1	SINE	B4	SINE
8.57869	0.194741	0.727156	0.267812	0.788844	0.936126	Not sig	L1Md_F2_chr7-141449724-141450320	-	L1Md_F2	LINE	L1	LINE
10.6978	0.194171	0.673263	0.288403	0.773038	0.928472	Not sig	B1F_chr15-102433955-102434096	-	B1F	SINE	Alu	SINE
37.6523	0.191851	0.684251	0.280381	0.779185	0.929995	Not sig	B1_Mur1_chr15-102529162-102529307	-	B1_Mur1	SINE	Alu	SINE
11.2702	0.191781	0.595474	0.322064	0.747404	0.922328	Not sig	L1MA6_chr4-154405956-154406175	+	L1MA6	LINE	L1	LINE
8.97596	0.189812	0.657103	0.288862	0.772687	0.928472	Not sig	L2_chr13-116903602-116904080	-	L2	LINE	L2	LINE
20.5623	0.189316	0.477632	0.396364	0.691836	0.903762	Not sig	MTD_chr19-60769385-60769633	+	MTD	LTR	ERVL-MaLR	ERVL
6.94787	0.187019	1.24743	0.149924	0.880825	0.968105	Not sig	Lx8_chr9-113867595-113868076	-	Lx8	LINE	L1	LINE
8.29766	0.186477	0.669152	0.278676	0.780493	0.930522	Not sig	RLTR31C_MM_chr16-91410140-91410454	-	RLTR31C_MM	LTR	ERVK	ERVK
11.9084	0.185998	0.652956	0.284856	0.775754	0.929748	Not sig	RMER6A_chr11-121343702-121344386	-	RMER6A	LTR	ERVK	ERVK
17.6054	0.185832	0.520527	0.357007	0.721087	0.914029	Not sig	Lx8_chr13-116907402-116907902	+	Lx8	LINE	L1	LINE
23.5401	0.185133	0.484358	0.382224	0.702295	0.903891	Not sig	B2_Mm2_chr4-150577324-150577510	-	B2_Mm2	SINE	B2	SINE
12.1762	0.184895	0.585519	0.315781	0.752169	0.922902	Not sig	L1_Mur2_chr9-120971256-120972748	+	L1_Mur2	LINE	L1	LINE
8.98306	0.181045	0.781564	0.231645	0.816814	0.946172	Not sig	L1Md_F2_chrX-169147418-169148094	-	L1Md_F2	LINE	L1	LINE
15.1358	0.180423	0.906227	0.199093	0.84219	0.960494	Not sig	L1MC4_chr1-193106014-193106121	+	L1MC4	LINE	L1	LINE
21.7488	0.179552	0.446426	0.402198	0.687538	0.901318	Not sig	B4_chr7-143238875-143239153	-	B4	SINE	B4	SINE
10.1434	0.179464	0.671197	0.267379	0.789178	0.936126	Not sig	MLT1C_chr4-150311447-150311744	-	MLT1C	LTR	ERVL-MaLR	ERVL
12.9213	0.178034	0.558411	0.318822	0.749862	0.922865	Not sig	RSINE1_chr16-95996385-95996547	+	RSINE1	SINE	B4	SINE
16.5402	0.176734	0.555717	0.318029	0.750463	0.922865	Not sig	PB1D10_chr4-150239809-150239929	+	PB1D10	SINE	Alu	SINE
7.55071	0.176306	0.830692	0.21224	0.83192	0.955728	Not sig	L1_Mus2_chr1-195065807-195066641	-	L1_Mus2	LINE	L1	LINE
7.71792	0.176114	0.678849	0.25943	0.795303	0.937374	Not sig	B1_Mus1_chr4-150312558-150312683	+	B1_Mus1	SINE	Alu	SINE
11.0599	0.174137	0.981782	0.177368	0.859219	0.962361	Not sig	B1_Mur1_chr9-116125112-116125262	+	B1_Mur1	SINE	Alu	SINE
24.2709	0.170584	0.474287	0.359664	0.719099	0.913515	Not sig	MYSERV6-int_chr4-147823894-147824925	+	MYSERV6-int	LTR	ERVK	ERVK
7.49717	0.170178	0.786231	0.216448	0.828638	0.954001	Not sig	B4_chr16-90850243-90850416	-	B4	SINE	B4	SINE
10.5813	0.166575	0.610859	0.27269	0.785091	0.93408	Not sig	MTC_chr11-121270559-121270971	+	MTC	LTR	ERVL-MaLR	ERVL
8.26161	0.164131	0.715968	0.229243	0.81868	0.946699	Not sig	B4A_chrX-162864177-162864491	-	B4A	SINE	B4	SINE
7.25718	0.161602	0.841609	0.192016	0.84773	0.960494	Not sig	MER68_chr19-56558472-56558999	-	MER68	LTR	ERVL	ERVL
6.56853	0.160569	0.86285	0.186091	0.852373	0.962047	Not sig	RMER17B_chr9-119276123-119276879	+	RMER17B	LTR	ERVK	ERVK
9.45046	0.159045	0.671227	0.236946	0.812699	0.943635	Not sig	Lx8_chr9-116105281-116105563	-	Lx8	LINE	L1	LINE
12.1802	0.15857	0.595851	0.266124	0.790144	0.936126	Not sig	L2_chr9-120940773-120940868	+	L2	LINE	L2	LINE
14.1326	0.158081	0.538963	0.293305	0.769289	0.928472	Not sig	B1_Mus2_chr16-91743675-91743820	-	B1_Mus2	SINE	Alu	SINE
18.2311	0.157699	0.487908	0.323214	0.746533	0.921784	Not sig	B3A_chr6-145961703-145961825	+	B3A	SINE	B2	SINE
7.36365	0.15692	0.712468	0.220248	0.825678	0.952637	Not sig	Lx2B_chr7-142028559-142028982	+	Lx2B	LINE	L1	LINE
13.2878	0.155723	0.631602	0.246553	0.805254	0.939682	Not sig	RMER17C-int_chr9-113871282-113871920	-	RMER17C-int	LTR	ERVK	ERVK
14.7245	0.154597	0.522902	0.295651	0.767496	0.928472	Not sig	B1F1_chrX-162764789-162764933	-	B1F1	SINE	Alu	SINE
6.7423	0.154456	1.36334	0.113292	0.909799	0.977306	Not sig	ORR1B1_chr4-156003263-156003594	-	ORR1B1	LTR	ERVL-MaLR	ERVL
9.37414	0.153199	0.647202	0.236709	0.812882	0.943635	Not sig	PB1_chr6-140650524-140650642	-	PB1	SINE	Alu	SINE
6.85373	0.152925	0.77766	0.196648	0.844103	0.960494	Not sig	B3_chr7-144518305-144518491	-	B3	SINE	B2	SINE
27.8388	0.152893	0.446357	0.342536	0.731948	0.919363	Not sig	ORR1A2-int_chr4-148048956-148050743	+	ORR1A2-int	LTR	ERVL-MaLR	ERVL
7.55093	0.149232	0.750423	0.198864	0.842369	0.960494	Not sig	B3_chr6-140647446-140647531	+	B3	SINE	B2	SINE
6.78259	0.149225	0.75322	0.198116	0.842955	0.960494	Not sig	PB1D10_chr4-148593021-148593117	+	PB1D10	SINE	Alu	SINE
18.184	0.14884	0.514704	0.289176	0.772446	0.928472	Not sig	Lx8_chrX-169098696-169099198	+	Lx8	LINE	L1	LINE
13.3675	0.147774	0.567115	0.260571	0.794424	0.937374	Not sig	L1Md_T_chr13-116918994-116919740	+	L1Md_T	LINE	L1	LINE
11.6047	0.146994	0.620629	0.236847	0.812776	0.943635	Not sig	RLTR1B-int_chr8-129269154-129270749	+	RLTR1B-int	LTR	ERV1	ERV1
29.6419	0.146983	0.493519	0.297826	0.765836	0.927997	Not sig	RMER4A_chr4-155608190-155608629	-	RMER4A	LTR	ERVK	ERVK
18.7125	0.14668	0.474586	0.30907	0.757268	0.925603	Not sig	RLTR20C1_MM_chr4-154628513-154628580	+	RLTR20C1_MM	LTR	ERVK	ERVK
25.6771	0.14656	0.753791	0.194431	0.845839	0.960494	Not sig	L2b_chr6-145749716-145749885	+	L2b	LINE	L2	LINE
8.96285	0.146502	0.676627	0.216518	0.828584	0.954001	Not sig	RMER15_chr7-143555020-143555152	+	RMER15	LTR	ERVL	ERVL
10.7715	0.145179	0.579226	0.250643	0.80209	0.939532	Not sig	ORR1A4_chr6-146980511-146980833	+	ORR1A4	LTR	ERVL-MaLR	ERVL
7.72873	0.143464	0.719287	0.199454	0.841908	0.960494	Not sig	RMER10A_chr9-116902071-116902347	-	RMER10A	LTR	ERVL	ERVL
8.9598	0.135388	0.673159	0.201124	0.840602	0.960494	Not sig	B1_Mur3_chr16-96079868-96080013	+	B1_Mur3	SINE	Alu	SINE
7.49764	0.133997	0.771139	0.173765	0.86205	0.96243	Not sig	RSINE1_chrX-162777994-162778101	+	RSINE1	SINE	B4	SINE
24.9363	0.133449	0.435052	0.306743	0.759039	0.926132	Not sig	MTE2b_chr4-150586090-150586366	-	MTE2b	LTR	ERVL-MaLR	ERVL
7.09294	0.132697	0.72871	0.182099	0.855505	0.962047	Not sig	MTA_Mm_chr15-102550656-102551053	+	MTA_Mm	LTR	ERVL-MaLR	ERVL
14.833	0.131249	0.527593	0.24877	0.803539	0.939532	Not sig	MIR_chr16-92674937-92675061	+	MIR	SINE	MIR	SINE
7.54716	0.131013	0.749073	0.1749	0.861158	0.96243	Not sig	L2a_chr9-113691189-113691274	-	L2a	LINE	L2	LINE
23.2223	0.129424	0.451079	0.28692	0.774174	0.928662	Not sig	RLTR20A4_chr4-154440337-154440401	+	RLTR20A4	LTR	ERVK	ERVK
8.8408	0.129374	0.693026	0.18668	0.851912	0.962047	Not sig	B3A_chr15-103233446-103233639	-	B3A	SINE	B2	SINE
13.1335	0.128811	0.540909	0.238138	0.811774	0.943635	Not sig	L1_Mus3_chr16-96071553-96072351	-	L1_Mus3	LINE	L1	LINE
6.58797	0.128043	0.782279	0.16368	0.869983	0.964859	Not sig	B2_Mm2_chr6-140457812-140457987	-	B2_Mm2	SINE	B2	SINE
8.0187	0.127827	0.776346	0.164653	0.869217	0.964859	Not sig	L1MB8_chr9-114778099-114778579	-	L1MB8	LINE	L1	LINE
32.289	0.125035	0.441958	0.28291	0.777246	0.929748	Not sig	L1Md_F2_chrX-169128730-169134978	-	L1Md_F2	LINE	L1	LINE
13.5841	0.122266	0.568588	0.215035	0.82974	0.954758	Not sig	ERVL-int_chr4-149948032-149949687	-	ERVL-int	LTR	ERVL	ERVL
7.763	0.122121	0.695623	0.175556	0.860643	0.96243	Not sig	ID_B1_chr19-60573499-60573638	+	ID_B1	SINE	B4	SINE
9.23769	0.121655	0.629141	0.193367	0.846672	0.960494	Not sig	MTE2b_chr9-116776552-116776972	+	MTE2b	LTR	ERVL-MaLR	ERVL
9.16397	0.117465	0.717694	0.163669	0.869991	0.964859	Not sig	MMERGLN-int_chr13-117165748-117173336	-	MMERGLN-int	LTR	ERV1	ERV1
11.2298	0.116873	0.638883	0.182933	0.854851	0.962047	Not sig	Lx2B_chr7-142027604-142028149	+	Lx2B	LINE	L1	LINE
8.10433	0.114593	0.682353	0.167938	0.866632	0.963667	Not sig	L1Md_F2_chr19-55271820-55272195	-	L1Md_F2	LINE	L1	LINE
12.2142	0.113685	0.589564	0.192829	0.847093	0.960494	Not sig	L1MC_chr7-142011069-142011338	-	L1MC	LINE	L1	LINE
7.62172	0.109198	1.14586	0.0952975	0.924079	0.980781	Not sig	ID_B1_chr19-60578821-60579042	-	ID_B1	SINE	B4	SINE
15.264	0.108435	0.521389	0.207973	0.83525	0.958528	Not sig	B1_Mur4_chr9-122851012-122851089	-	B1_Mur4	SINE	Alu	SINE
9.94195	0.107974	1.24248	0.0869026	0.930749	0.981517	Not sig	B2_Mm2_chr4-150246205-150246364	+	B2_Mm2	SINE	B2	SINE
11.2587	0.105926	1.33563	0.079308	0.936788	0.981983	Not sig	ORR1F_chr16-90256620-90256739	+	ORR1F	LTR	ERVL-MaLR	ERVL
15.9239	0.102783	0.548274	0.187467	0.851294	0.962047	Not sig	ORR1A2_chr16-92635861-92636209	+	ORR1A2	LTR	ERVL-MaLR	ERVL
6.79458	0.0999187	0.763199	0.130921	0.895838	0.972417	Not sig	L1_Mus1_chr4-150367624-150368217	+	L1_Mus1	LINE	L1	LINE
7.01677	0.0994887	0.758237	0.131211	0.895609	0.972417	Not sig	L1_Mur2_chr1-195108452-195110342	+	L1_Mur2	LINE	L1	LINE
9.84792	0.0988526	0.686881	0.143915	0.885567	0.968236	Not sig	ORR1E_chr19-55520681-55520986	-	ORR1E	LTR	ERVL-MaLR	ERVL
9.92253	0.0986704	1.04584	0.0943456	0.924835	0.980781	Not sig	Lx6_chrX-169092393-169092915	-	Lx6	LINE	L1	LINE
7.81387	0.0932624	0.689736	0.135215	0.892442	0.971665	Not sig	RMER6A_chr4-148451445-148452228	-	RMER6A	LTR	ERVK	ERVK
18.4207	0.0917292	0.468825	0.195658	0.844878	0.960494	Not sig	HERVL40-int_chr13-119778021-119778943	+	HERVL40-int	LTR	ERVL	ERVL
8.05415	0.0905527	0.675216	0.134109	0.893316	0.971665	Not sig	B2_Mm1t_chr4-151978790-151978974	-	B2_Mm1t	SINE	B2	SINE
8.81542	0.0892091	0.707531	0.126085	0.899665	0.975197	Not sig	B1_Mus1_chr9-120132911-120133038	-	B1_Mus1	SINE	Alu	SINE
46.0226	0.0891713	0.364235	0.244818	0.806597	0.940494	Not sig	Lx5_chr6-145799354-145800755	-	Lx5	LINE	L1	LINE
8.7726	0.0868291	0.727956	0.119278	0.905055	0.976359	Not sig	Lx8_chr15-102576668-102577465	+	Lx8	LINE	L1	LINE
8.7554	0.0867808	0.699045	0.124142	0.901203	0.975773	Not sig	L1Md_F2_chrX-166465355-166466341	+	L1Md_F2	LINE	L1	LINE
16.6025	0.086296	0.545108	0.15831	0.874213	0.965368	Not sig	B1_Mur1_chr4-150247015-150247113	+	B1_Mur1	SINE	Alu	SINE
10.357	0.0826569	0.619086	0.133515	0.893786	0.971665	Not sig	PB1D9_chr4-148611656-148611759	-	PB1D9	SINE	Alu	SINE
7.39491	0.0802627	0.761387	0.105416	0.916045	0.979489	Not sig	RMER12B_chr19-55306406-55306626	+	RMER12B	LTR	ERVK	ERVK
21.0813	0.0792279	0.525207	0.150851	0.880093	0.968105	Not sig	PB1D7_chr7-144934498-144934584	+	PB1D7	SINE	Alu	SINE
7.22856	0.0786884	0.782375	0.100576	0.919887	0.980664	Not sig	RMER12_chr4-155643658-155644113	-	RMER12	LTR	ERVK	ERVK
11.7053	0.0776363	0.579508	0.133969	0.893427	0.971665	Not sig	ORR1A0-int_chr7-141503548-141505327	+	ORR1A0-int	LTR	ERVL-MaLR	ERVL
27.0438	0.077029	0.412023	0.186953	0.851698	0.962047	Not sig	B1F1_chr15-102434174-102434307	-	B1F1	SINE	Alu	SINE
9.1417	0.0759977	0.643174	0.11816	0.905941	0.976359	Not sig	B3_chr4-155505933-155506007	-	B3	SINE	B2	SINE
12.3995	0.0746486	0.592629	0.125962	0.899762	0.975197	Not sig	ORR1C1_chr6-140573561-140573862	-	ORR1C1	LTR	ERVL-MaLR	ERVL
15.5648	0.0743691	0.521363	0.142644	0.886572	0.968236	Not sig	MLT1F1_chr4-150291426-150291699	-	MLT1F1	LTR	ERVL-MaLR	ERVL
8.76374	0.0736679	0.711133	0.103592	0.917493	0.979775	Not sig	ORR1C2_chr9-118563695-118564052	+	ORR1C2	LTR	ERVL-MaLR	ERVL
51.0581	0.0702564	0.443329	0.158475	0.874083	0.965368	Not sig	L2_chr15-102533282-102533379	-	L2	LINE	L2	LINE
12.9358	0.0658274	0.544791	0.120831	0.903825	0.976359	Not sig	B1_Mus2_chr19-59308889-59309037	-	B1_Mus2	SINE	Alu	SINE
18.3408	0.0646589	0.480859	0.134465	0.893035	0.971665	Not sig	MusHAL1_chr7-143217687-143219588	-	MusHAL1	LINE	L1	LINE
14.4776	0.0587991	0.568919	0.103352	0.917683	0.979775	Not sig	MTD_chr7-143521723-143522068	+	MTD	LTR	ERVL-MaLR	ERVL
7.63783	0.058473	0.714498	0.0818379	0.934776	0.981983	Not sig	Lx2B_chr19-57799377-57799566	-	Lx2B	LINE	L1	LINE
11.302	0.0565411	0.58533	0.096597	0.923046	0.980781	Not sig	B3A_chr16-94404043-94404148	+	B3A	SINE	B2	SINE
7.01192	0.0562636	0.718487	0.0783084	0.937583	0.981983	Not sig	L1_Rod_chrX-162944691-162945544	+	L1_Rod	LINE	L1	LINE
10.5057	0.0560906	0.612683	0.0915492	0.927056	0.981355	Not sig	B1_Mur4_chr7-141472487-141472625	+	B1_Mur4	SINE	Alu	SINE
34.508	0.055919	0.398099	0.140465	0.888292	0.969186	Not sig	RMER17B_chr6-140461622-140462519	+	RMER17B	LTR	ERVK	ERVK
7.1903	0.0558768	0.708125	0.078908	0.937106	0.981983	Not sig	MTE-int_chr16-94500117-94500802	+	MTE-int	LTR	ERVL-MaLR	ERVL
7.67243	0.0546468	0.708407	0.0771404	0.938512	0.981983	Not sig	MTEa_chr7-141395709-141396022	-	MTEa	LTR	ERVL-MaLR	ERVL
8.25161	0.0544033	0.6721	0.0809452	0.935486	0.981983	Not sig	Lx5c_chr17-94826449-94826787	+	Lx5c	LINE	L1	LINE
38.4974	0.051504	0.449052	0.114695	0.908687	0.977306	Not sig	MTE2a_chr13-117012588-117012964	+	MTE2a	LTR	ERVL-MaLR	ERVL
9.5341	0.0493358	1.296	0.0380678	0.969634	0.992291	Not sig	B1_Mur3_chr6-145761478-145761598	-	B1_Mur3	SINE	Alu	SINE
8.6154	0.0448864	0.71317	0.0629392	0.949815	0.985854	Not sig	L1MB8_chr19-55854732-55855107	-	L1MB8	LINE	L1	LINE
8.56962	0.0437894	0.691536	0.0633219	0.94951	0.985854	Not sig	B3_chr9-121736549-121736722	-	B3	SINE	B2	SINE
13.7287	0.0418611	0.525085	0.0797224	0.936458	0.981983	Not sig	B2_Mm1t_chr9-123090814-123090999	-	B2_Mm1t	SINE	B2	SINE
13.6661	0.0412681	0.604423	0.0682769	0.945565	0.983971	Not sig	MIRc_chr9-121734025-121734082	+	MIRc	SINE	MIR	SINE
15.548	0.0400902	0.536865	0.0746746	0.940474	0.983077	Not sig	B4A_chr6-147014488-147014757	+	B4A	SINE	B4	SINE
37.7663	0.0395749	0.417383	0.0948166	0.92446	0.980781	Not sig	L1Md_F2_chr7-143676013-143678191	-	L1Md_F2	LINE	L1	LINE
23.8981	0.0392384	0.438919	0.0893979	0.928766	0.981355	Not sig	B4_chr13-117016292-117016573	+	B4	SINE	B4	SINE
9.28819	0.0390675	0.718686	0.0543597	0.956649	0.988119	Not sig	L1MEc_chr16-94638386-94638494	-	L1MEc	LINE	L1	LINE
7.97302	0.0384875	0.702305	0.0548016	0.956297	0.988119	Not sig	L1_Mus3_chr16-90858659-90859039	+	L1_Mus3	LINE	L1	LINE
7.40895	0.037803	0.747102	0.0505995	0.959645	0.988119	Not sig	L1MC3_chr16-85088764-85089141	+	L1MC3	LINE	L1	LINE
17.621	0.0377334	0.488934	0.077175	0.938484	0.981983	Not sig	RMER17A_chr13-117003061-117003603	+	RMER17A	LTR	ERVK	ERVK
7.54964	0.0374945	0.753029	0.0497915	0.960289	0.988119	Not sig	Lx9_chr19-58046595-58047277	-	Lx9	LINE	L1	LINE
3527.53	0.0365938	0.225165	0.16252	0.870897	0.965196	Not sig	MTB_Mm_chr13-116000000-116000379	+	MTB_Mm	LTR	ERVL-MaLR	ERVL
12.649	0.0362364	0.647808	0.0559369	0.955392	0.988119	Not sig	B1_Mm_chr6-140653831-140653917	+	B1_Mm	SINE	Alu	SINE
7.90872	0.0347816	0.727605	0.0478029	0.961873	0.988119	Not sig	B1_Mus1_chr9-119241524-119241637	-	B1_Mus1	SINE	Alu	SINE
8.66275	0.034636	0.661784	0.0523373	0.95826	0.988119	Not sig	MTD_chr9-115257897-115258284	+	MTD	LTR	ERVL-MaLR	ERVL
33.0377	0.0332822	0.421185	0.0790204	0.937016	0.981983	Not sig	B1F1_chr15-102472614-102472751	-	B1F1	SINE	Alu	SINE
48.1882	0.0311078	0.37641	0.0826433	0.934135	0.981983	Not sig	ID_chr7-141485959-141486029	+	ID	SINE	ID	SINE
8.57204	0.0298764	0.77662	0.0384697	0.969313	0.992291	Not sig	PB1D9_chr4-148624003-148624108	-	PB1D9	SINE	Alu	SINE
17.3226	0.0271561	0.509852	0.0532626	0.957523	0.988119	Not sig	ORR1B1_chrX-169111147-169111528	-	ORR1B1	LTR	ERVL-MaLR	ERVL
6.57617	0.0247995	0.753873	0.0328961	0.973757	0.992867	Not sig	RLTR53_Mm_chr16-93858990-93859417	-	RLTR53_Mm	LTR	ERVK	ERVK
7.34904	0.0246616	0.796074	0.030979	0.975286	0.992867	Not sig	B1F_chr6-140543175-140543278	+	B1F	SINE	Alu	SINE
9.70897	0.0222469	0.706856	0.031473	0.974892	0.992867	Not sig	RLTR17B_Mm_chr16-90871543-90871644	-	RLTR17B_Mm	LTR	ERVK	ERVK
25.3199	0.0216157	0.448053	0.0482435	0.961522	0.988119	Not sig	B2_Mm2_chr16-92074598-92074743	-	B2_Mm2	SINE	B2	SINE
8.78602	0.0210618	0.644392	0.0326848	0.973926	0.992867	Not sig	ORR1B2_chr16-98056576-98056923	-	ORR1B2	LTR	ERVL-MaLR	ERVL
28.1487	0.0202358	0.420325	0.0481431	0.961602	0.988119	Not sig	L1MD3_chr7-143258420-143258889	-	L1MD3	LINE	L1	LINE
10.9214	0.0178876	0.64145	0.0278862	0.977753	0.994435	Not sig	B4A_chr16-84844969-84845242	+	B4A	SINE	B4	SINE
9.34481	0.0178621	0.668258	0.0267293	0.978676	0.994902	Not sig	RSINE1_chr4-155531506-155531669	+	RSINE1	SINE	B4	SINE
74.6097	0.0173046	0.358614	0.0482542	0.961514	0.988119	Not sig	B1_Mm_chr9-114723569-114723699	-	B1_Mm	SINE	Alu	SINE
26.0943	0.016862	0.460892	0.0365855	0.970815	0.992554	Not sig	B3_chr9-122850355-122850491	-	B3	SINE	B2	SINE
28.6076	0.0164647	0.440126	0.037409	0.970159	0.992355	Not sig	ORR1A4-int_chr17-94816022-94816979	-	ORR1A4-int	LTR	ERVL-MaLR	ERVL
14.0671	0.0153629	0.545978	0.0281383	0.977552	0.994435	Not sig	ORR1B1_chr7-143567264-143567610	+	ORR1B1	LTR	ERVL-MaLR	ERVL
8.60552	0.0153492	1.09093	0.0140699	0.988774	0.995361	Not sig	ID4_chr4-150875363-150875433	+	ID4	SINE	ID	SINE
10.0108	0.014708	1.09884	0.0133851	0.989321	0.995361	Not sig	Lx5_chr6-146601218-146602164	+	Lx5	LINE	L1	LINE
8.62138	0.0146248	0.676131	0.02163	0.982743	0.995361	Not sig	RMER12_chr9-121417766-121418092	-	RMER12	LTR	ERVK	ERVK
46.4936	0.012078	0.37115	0.0325421	0.97404	0.992867	Not sig	PB1D9_chr19-59296795-59296899	+	PB1D9	SINE	Alu	SINE
10.185	0.00981023	0.678245	0.0144641	0.98846	0.995361	Not sig	PB1D10_chr15-102669842-102669971	+	PB1D10	SINE	Alu	SINE
6.58691	0.00947155	0.851859	0.0111187	0.991129	0.995361	Not sig	ID_B1_chr16-92068902-92069049	-	ID_B1	SINE	B4	SINE
21.4669	0.00921453	0.50348	0.0183017	0.985398	0.995361	Not sig	B1_Mus1_chr6-143174684-143174831	+	B1_Mus1	SINE	Alu	SINE
13.1458	0.00862845	1.06293	0.00811758	0.993523	0.995361	Not sig	RMER17C_chr5-151155091-151155565	-	RMER17C	LTR	ERVK	ERVK
6.60265	0.0070255	0.732896	0.00958594	0.992352	0.995361	Not sig	PB1D7_chr9-119242156-119242271	+	PB1D7	SINE	Alu	SINE
6.93434	0.00681975	0.726792	0.00938336	0.992513	0.995361	Not sig	L1Md_F2_chr6-149500000-149505012	+	L1Md_F2	LINE	L1	LINE
28.0758	0.00585716	0.426998	0.0137171	0.989056	0.995361	Not sig	ORR1A3_chr9-119243619-119243946	+	ORR1A3	LTR	ERVL-MaLR	ERVL
10.0028	0.00519892	0.634387	0.00819518	0.993461	0.995361	Not sig	B2_Mm2_chr13-119772191-119772377	+	B2_Mm2	SINE	B2	SINE
16.9764	0.00380777	0.485692	0.00783988	0.993745	0.995361	Not sig	MLT1C_chr16-92672170-92672446	-	MLT1C	LTR	ERVL-MaLR	ERVL
11.8261	-0.000344827	1.08475	-0.000317886	0.999746	0.999746	Not sig	Lx8_chr7-143259604-143260000	+	Lx8	LINE	L1	LINE
13.9468	-0.000417922	0.525825	-0.000794793	0.999366	0.999746	Not sig	RLTR15_chr7-143530206-143530541	+	RLTR15	LTR	ERVK	ERVK
9.61784	-0.00143421	0.725637	-0.00197649	0.998423	0.999354	Not sig	B3_chr16-94415042-94415166	+	B3	SINE	B2	SINE
6.84096	-0.00558756	0.739316	-0.00755774	0.99397	0.995361	Not sig	B1F2_chr9-114379500-114379634	+	B1F2	SINE	Alu	SINE
8.91644	-0.00726066	0.645949	-0.0112403	0.991032	0.995361	Not sig	B4A_chr16-90847408-90847622	-	B4A	SINE	B4	SINE
14.5966	-0.00776929	0.578481	-0.0134305	0.989284	0.995361	Not sig	BGLII_B_chr4-147786693-147787035	+	BGLII_B	LTR	ERVK	ERVK
8.88691	-0.00806191	0.649789	-0.012407	0.990101	0.995361	Not sig	RSINE1_chr16-87413895-87414036	-	RSINE1	SINE	B4	SINE
6.64385	-0.00996293	0.889541	-0.0112001	0.991064	0.995361	Not sig	Lx3_Mus_chr9-113807026-113808082	-	Lx3_Mus	LINE	L1	LINE
8.50836	-0.010664	1.30927	-0.00814498	0.993501	0.995361	Not sig	B1_Mus1_chr4-145414298-145414441	-	B1_Mus1	SINE	Alu	SINE
6.56886	-0.0106652	0.773511	-0.0137881	0.988999	0.995361	Not sig	B1_Mus2_chr9-118100286-118100418	-	B1_Mus2	SINE	Alu	SINE
10.8197	-0.0107297	0.5901	-0.0181829	0.985493	0.995361	Not sig	RMER6A_chr4-152191218-152191785	-	RMER6A	LTR	ERVK	ERVK
8.89948	-0.0112795	0.646302	-0.0174523	0.986076	0.995361	Not sig	MER21C_chr6-146564589-146565286	+	MER21C	LTR	ERVL	ERVL
15.7484	-0.0117101	0.626827	-0.0186816	0.985095	0.995361	Not sig	B1_Mus1_chr6-146915300-146915423	-	B1_Mus1	SINE	Alu	SINE
11.6507	-0.0137973	0.618918	-0.0222926	0.982215	0.995361	Not sig	ERVL-B4-int_chr4-147869737-147870275	+	ERVL-B4-int	LTR	ERVL	ERVL
8.06543	-0.0139644	0.669176	-0.0208681	0.983351	0.995361	Not sig	ORR1G_chr19-60186061-60186301	+	ORR1G	LTR	ERVL-MaLR	ERVL
7.92511	-0.0155571	0.773191	-0.0201206	0.983947	0.995361	Not sig	L1Md_F2_chr6-148074919-148081067	-	L1Md_F2	LINE	L1	LINE
15.4267	-0.0163326	0.506763	-0.0322293	0.974289	0.992867	Not sig	B3_chr15-103360551-103360751	-	B3	SINE	B2	SINE
9.36963	-0.0174631	1.10124	-0.0158576	0.987348	0.995361	Not sig	B2_Mm2_chr4-150536501-150536670	+	B2_Mm2	SINE	B2	SINE
7.16602	-0.0183437	0.804276	-0.0228077	0.981804	0.995361	Not sig	MTD_chr7-144461617-144462013	+	MTD	LTR	ERVL-MaLR	ERVL
11.9911	-0.0225866	0.584669	-0.0386314	0.969184	0.992291	Not sig	PB1D10_chrX-163929058-163929160	+	PB1D10	SINE	Alu	SINE
6.56392	-0.0246624	0.73612	-0.0335032	0.973273	0.992867	Not sig	B4A_chr13-117675035-117675287	+	B4A	SINE	B4	SINE
11.9417	-0.0259586	0.574393	-0.045193	0.963953	0.989049	Not sig	B3_chr4-150479936-150480140	+	B3	SINE	B2	SINE
20.3819	-0.0273297	0.453301	-0.0602904	0.951924	0.986398	Not sig	B3_chr4-154607829-154608036	-	B3	SINE	B2	SINE
7.53371	-0.0285861	0.724241	-0.0394704	0.968515	0.992291	Not sig	RSINE1_chr16-93845720-93845816	-	RSINE1	SINE	B4	SINE
8.96943	-0.0302245	0.672665	-0.0449325	0.964161	0.989049	Not sig	RSINE1_chr9-114561885-114562007	+	RSINE1	SINE	B4	SINE
33.4251	-0.0317348	0.40765	-0.0778483	0.937949	0.981983	Not sig	RLTR17_chr4-150310382-150311014	-	RLTR17	LTR	ERVK	ERVK
8.26313	-0.0325411	0.713138	-0.0456309	0.963604	0.989049	Not sig	Lx8_chr6-146239764-146240214	+	Lx8	LINE	L1	LINE
7.8389	-0.0332082	0.684804	-0.048493	0.961323	0.988119	Not sig	RSINE1_chr9-118060761-118060895	+	RSINE1	SINE	B4	SINE
13.5165	-0.0339961	0.545523	-0.0623184	0.950309	0.985854	Not sig	Lx7_chr1-195112439-195112980	+	Lx7	LINE	L1	LINE
15.5202	-0.035326	0.505646	-0.0698631	0.944303	0.983971	Not sig	ERVL-B4-int_chr4-147868953-147869560	+	ERVL-B4-int	LTR	ERVL	ERVL
11.4506	-0.0362511	0.607738	-0.0596491	0.952435	0.986451	Not sig	ORR1A2_chr4-154580373-154580717	+	ORR1A2	LTR	ERVL-MaLR	ERVL
7.71693	-0.03714	0.731666	-0.0507609	0.959516	0.988119	Not sig	L1M4c_chr19-56555104-56555628	+	L1M4c	LINE	L1	LINE
20.5139	-0.0383197	0.494868	-0.077434	0.938278	0.981983	Not sig	B3_chr4-150243332-150243445	-	B3	SINE	B2	SINE
28.2519	-0.0386064	0.418458	-0.0922588	0.926492	0.981355	Not sig	RLTR28_chr7-144442939-144443309	-	RLTR28	LTR	ERVL	ERVL
11.6775	-0.0392939	0.576553	-0.0681531	0.945664	0.983971	Not sig	MTB_chr4-150293015-150293398	-	MTB	LTR	ERVL-MaLR	ERVL
8.12818	-0.0416314	0.708191	-0.0587856	0.953123	0.986687	Not sig	ORR1E_chr13-116969716-116970034	-	ORR1E	LTR	ERVL-MaLR	ERVL
9.36595	-0.0416957	0.636006	-0.0655586	0.947729	0.984904	Not sig	PB1D10_chr9-121744644-121744756	-	PB1D10	SINE	Alu	SINE
11.3254	-0.0437418	0.603374	-0.0724954	0.942208	0.983931	Not sig	L1MB7_chrX-169170048-169170974	-	L1MB7	LINE	L1	LINE
19.6277	-0.0443707	0.54711	-0.0811001	0.935362	0.981983	Not sig	L2a_chr4-150308290-150308752	-	L2a	LINE	L2	LINE
7.63886	-0.0446493	0.725699	-0.0615259	0.95094	0.985854	Not sig	B3_chr13-117000359-117000557	-	B3	SINE	B2	SINE
65.1408	-0.0464457	0.379353	-0.122434	0.902555	0.976359	Not sig	L1_Mus1_chr16-98059686-98062165	-	L1_Mus1	LINE	L1	LINE
8.56475	-0.046972	0.692411	-0.0678384	0.945914	0.983971	Not sig	B4_chr4-152247067-152247160	-	B4	SINE	B4	SINE
18.246	-0.0473471	0.503116	-0.0941077	0.925024	0.980781	Not sig	B2_Mm2_chrX-162763250-162763431	-	B2_Mm2	SINE	B2	SINE
7.39206	-0.0487872	0.789674	-0.0617814	0.950737	0.985854	Not sig	B1F2_chr19-59288365-59288508	-	B1F2	SINE	Alu	SINE
32.1029	-0.04994	0.413987	-0.120632	0.903983	0.976359	Not sig	ID4__chr15-102479710-102479787	-	ID4_	SINE	ID	SINE
13.5367	-0.0510094	0.576909	-0.0884184	0.929544	0.981465	Not sig	L2_chr16-92687236-92687346	+	L2	LINE	L2	LINE
9.78217	-0.0518687	0.688698	-0.0753141	0.939965	0.983024	Not sig	B2_Mm2_chr4-150551393-150551564	-	B2_Mm2	SINE	B2	SINE
11.0194	-0.0542988	0.59723	-0.0909177	0.927558	0.981355	Not sig	MTA_Mm-int_chr16-87390838-87391933	+	MTA_Mm-int	LTR	ERVL-MaLR	ERVL
19.6808	-0.0545693	0.463573	-0.117715	0.906294	0.976359	Not sig	B2_Mm1a_chr15-102077137-102077316	-	B2_Mm1a	SINE	B2	SINE
19.1881	-0.0554987	0.491182	-0.11299	0.910038	0.977306	Not sig	ORR1A3_chr9-113681373-113681695	+	ORR1A3	LTR	ERVL-MaLR	ERVL
8.11877	-0.0578958	0.739848	-0.0782535	0.937626	0.981983	Not sig	B1_Mus1_chr4-150293399-150293550	+	B1_Mus1	SINE	Alu	SINE
10.4149	-0.0595601	0.611881	-0.0973392	0.922457	0.980781	Not sig	RMER16_chr13-116984967-116985420	+	RMER16	LTR	ERVK	ERVK
14.4361	-0.0596391	0.59713	-0.0998763	0.920443	0.980769	Not sig	B1_Mus2_chr16-94636027-94636176	-	B1_Mus2	SINE	Alu	SINE
13.4442	-0.0608002	0.5514	-0.110265	0.912199	0.97828	Not sig	RSINE1_chr4-155730290-155730365	+	RSINE1	SINE	B4	SINE
81.5263	-0.0627976	0.326794	-0.192163	0.847615	0.960494	Not sig	ORR1A2-int_chr16-92663588-92664802	+	ORR1A2-int	LTR	ERVL-MaLR	ERVL
10.2866	-0.0634929	0.630727	-0.100666	0.919815	0.980664	Not sig	RMER10B_chr15-102542317-102542675	-	RMER10B	LTR	ERVL	ERVL
8.53577	-0.0646192	0.738162	-0.0875406	0.930242	0.981465	Not sig	ORR1B1_chr8-129284827-129285164	+	ORR1B1	LTR	ERVL-MaLR	ERVL
7.6723	-0.0652171	0.723487	-0.0901427	0.928174	0.981355	Not sig	RMER13A1_chr6-145064955-145065706	+	RMER13A1	LTR	ERVK	ERVK
8.03174	-0.0655242	0.689495	-0.0950321	0.924289	0.980781	Not sig	ID_B1_chr4-155526281-155526464	-	ID_B1	SINE	B4	SINE
6.95115	-0.0675186	0.800974	-0.0842956	0.932821	0.981983	Not sig	Lx9_chr13-116871929-116873133	+	Lx9	LINE	L1	LINE
11.1103	-0.0711096	0.651546	-0.10914	0.913092	0.97828	Not sig	Lx5c_chr17-94825687-94826181	+	Lx5c	LINE	L1	LINE
12.6557	-0.071298	0.603714	-0.118099	0.905989	0.976359	Not sig	ID_B1_chr4-155541161-155541367	+	ID_B1	SINE	B4	SINE
43.4633	-0.0714348	0.395426	-0.180653	0.85664	0.962047	Not sig	ORR1D2_chr9-113703973-113704231	+	ORR1D2	LTR	ERVL-MaLR	ERVL
83.6662	-0.073074	0.381635	-0.191476	0.848152	0.960494	Not sig	RLTR10C_chr7-143269706-143270127	+	RLTR10C	LTR	ERVK	ERVK
7.57703	-0.0730769	0.682046	-0.107144	0.914675	0.978999	Not sig	B3_chr19-60555893-60556092	-	B3	SINE	B2	SINE
7.0969	-0.0731661	0.718489	-0.101833	0.918889	0.980575	Not sig	ORR1D1_chr4-155201028-155201164	+	ORR1D1	LTR	ERVL-MaLR	ERVL
6.96317	-0.0732592	0.818536	-0.0895002	0.928684	0.981355	Not sig	L2_chrX-162154226-162154825	+	L2	LINE	L2	LINE
15.451	-0.0738162	0.513209	-0.143833	0.885633	0.968236	Not sig	L1Md_F2_chr16-98046721-98048167	-	L1Md_F2	LINE	L1	LINE
11.7705	-0.0757445	0.578107	-0.131022	0.895758	0.972417	Not sig	Lx3B_chr19-60557183-60557600	-	Lx3B	LINE	L1	LINE
8.03965	-0.079232	0.683231	-0.115967	0.907679	0.97687	Not sig	L1_Mus3_chr9-113824352-113824898	-	L1_Mus3	LINE	L1	LINE
12.6157	-0.0811412	0.568166	-0.142813	0.886438	0.968236	Not sig	RMER6A_chr6-145073479-145074264	-	RMER6A	LTR	ERVK	ERVK
9.61917	-0.0816923	0.742317	-0.11005	0.912369	0.97828	Not sig	PB1_chr9-113956504-113956630	-	PB1	SINE	Alu	SINE
6.7597	-0.0821667	0.729831	-0.112583	0.910361	0.977306	Not sig	MLT1B_chr16-90849099-90849403	+	MLT1B	LTR	ERVL-MaLR	ERVL
8.56111	-0.0828656	0.770101	-0.107604	0.91431	0.978999	Not sig	RSINE1_chr18-90534813-90534922	+	RSINE1	SINE	B4	SINE
27.3783	-0.084269	0.468599	-0.179832	0.857284	0.962047	Not sig	RMER19B_chr4-150329842-150330692	-	RMER19B	LTR	ERVK	ERVK
8.69556	-0.0858113	0.676235	-0.126896	0.899023	0.975197	Not sig	B3A_chr13-119341917-119342088	+	B3A	SINE	B2	SINE
9.20465	-0.0859431	0.737448	-0.116541	0.907224	0.97687	Not sig	RMER6A_chr19-60215843-60216607	-	RMER6A	LTR	ERVK	ERVK
7.83667	-0.0878563	0.701603	-0.125222	0.900348	0.975339	Not sig	Lx7_chr16-90246357-90246727	+	Lx7	LINE	L1	LINE
30.902	-0.0887003	0.424013	-0.209193	0.834298	0.957947	Not sig	Lx5_chrX-169058892-169059132	-	Lx5	LINE	L1	LINE
11.7149	-0.0896973	0.574758	-0.156061	0.875985	0.966035	Not sig	MTD_chr4-155534131-155534468	-	MTD	LTR	ERVL-MaLR	ERVL
11.2176	-0.0907036	0.627166	-0.144624	0.885007	0.968236	Not sig	RLTR1D2_MM_chr16-93851913-93852555	-	RLTR1D2_MM	LTR	ERV1	ERV1
13.013	-0.0916471	0.565232	-0.162141	0.871195	0.965196	Not sig	B1F1_chr16-92666384-92666504	+	B1F1	SINE	Alu	SINE
12.2687	-0.09243	0.580769	-0.159151	0.87355	0.965368	Not sig	ORR1B1_chrX-166431915-166432289	+	ORR1B1	LTR	ERVL-MaLR	ERVL
21.3079	-0.0928034	0.517189	-0.179438	0.857594	0.962047	Not sig	B4_chr4-154431734-154431871	+	B4	SINE	B4	SINE
9.51855	-0.0961072	0.618188	-0.155466	0.876454	0.966035	Not sig	RMER4B_chr9-119253987-119254528	+	RMER4B	LTR	ERVK	ERVK
8.51081	-0.0996394	0.697787	-0.142793	0.886453	0.968236	Not sig	ORR1B1-int_chr7-141577425-141578517	-	ORR1B1-int	LTR	ERVL-MaLR	ERVL
8.77713	-0.0997792	0.681379	-0.146437	0.883576	0.968236	Not sig	L2_chr16-97954830-97955087	-	L2	LINE	L2	LINE
6.89836	-0.10087	0.850195	-0.118643	0.905558	0.976359	Not sig	MTE2a_chr15-102332713-102333079	+	MTE2a	LTR	ERVL-MaLR	ERVL
8.48634	-0.101083	0.679041	-0.148861	0.881663	0.968105	Not sig	RMER4A_chr8-129265137-129265300	-	RMER4A	LTR	ERVK	ERVK
14.4376	-0.103155	0.574355	-0.179602	0.857465	0.962047	Not sig	PB1D10_chr7-142040027-142040136	+	PB1D10	SINE	Alu	SINE
9.65509	-0.10558	0.633129	-0.16676	0.867559	0.963667	Not sig	B2_Mm1a_chr15-102479981-102480174	-	B2_Mm1a	SINE	B2	SINE
15.9729	-0.106815	0.59289	-0.180161	0.857026	0.962047	Not sig	B1_Mur1_chr15-102479407-102479510	+	B1_Mur1	SINE	Alu	SINE
11.2154	-0.109365	0.640361	-0.170787	0.864392	0.962628	Not sig	B3_chr7-143516313-143516483	-	B3	SINE	B2	SINE
12.6703	-0.109737	0.579133	-0.189484	0.849713	0.961754	Not sig	B4A_chr19-56587048-56587317	+	B4A	SINE	B4	SINE
8.78455	-0.110451	0.66239	-0.166746	0.86757	0.963667	Not sig	RSINE1_chr4-155533979-155534065	+	RSINE1	SINE	B4	SINE
9.8216	-0.112316	0.697516	-0.161024	0.872075	0.965368	Not sig	B2_Mm2_chr15-102087252-102087440	+	B2_Mm2	SINE	B2	SINE
7.76837	-0.113049	0.706734	-0.15996	0.872913	0.965368	Not sig	B3A_chr19-60553361-60553512	-	B3A	SINE	B2	SINE
19.105	-0.116338	0.469107	-0.247998	0.804136	0.939532	Not sig	L1ME3_chr7-143266718-143267279	-	L1ME3	LINE	L1	LINE
56.7292	-0.116383	0.342081	-0.340221	0.73369	0.919363	Not sig	MLT1A0_chr6-145757913-145758205	+	MLT1A0	LTR	ERVL-MaLR	ERVL
7.83523	-0.117387	0.784941	-0.149548	0.881121	0.968105	Not sig	MIR_chr15-103355584-103355797	-	MIR	SINE	MIR	SINE
24.6574	-0.118222	0.446759	-0.264622	0.791301	0.936126	Not sig	B1F_chr6-142387815-142387946	-	B1F	SINE	Alu	SINE
22.9582	-0.119334	0.437886	-0.272524	0.785219	0.93408	Not sig	Lx6_chr4-147841061-147842014	+	Lx6	LINE	L1	LINE
8.04223	-0.119347	1.3565	-0.0879819	0.929891	0.981465	Not sig	MLT1D_chr16-91553371-91553776	+	MLT1D	LTR	ERVL-MaLR	ERVL
24.3924	-0.119644	0.451526	-0.264976	0.791028	0.936126	Not sig	L1_Mus1_chr4-150322438-150323498	+	L1_Mus1	LINE	L1	LINE
9.92472	-0.123868	0.675816	-0.183287	0.854573	0.962047	Not sig	PB1D11_chr6-148190487-148190588	-	PB1D11	SINE	Alu	SINE
10.1018	-0.124836	0.686754	-0.181776	0.855758	0.962047	Not sig	ID_B1_chr16-92642686-92642812	-	ID_B1	SINE	B4	SINE
25.1703	-0.12783	0.488651	-0.261599	0.793631	0.937374	Not sig	PB1D9_chr9-121720772-121720877	-	PB1D9	SINE	Alu	SINE
15.7515	-0.128412	0.510502	-0.251541	0.801396	0.939532	Not sig	B1_Mur3_chr9-121731920-121732060	+	B1_Mur3	SINE	Alu	SINE
6.60203	-0.128486	0.745747	-0.172291	0.863209	0.962513	Not sig	RSINE1_chr19-57489678-57489826	+	RSINE1	SINE	B4	SINE
121.682	-0.131871	0.335707	-0.392814	0.694457	0.903762	Not sig	L1_Mus3_chr7-143219635-143225990	-	L1_Mus3	LINE	L1	LINE
18.2113	-0.132233	0.525529	-0.251619	0.801335	0.939532	Not sig	L1VL2_chrX-166397098-166399972	-	L1VL2	LINE	L1	LINE
7.72938	-0.133094	0.777414	-0.1712	0.864066	0.962628	Not sig	B1_Mus1_chr15-102502881-102503007	-	B1_Mus1	SINE	Alu	SINE
7.75541	-0.133191	0.730165	-0.182412	0.85526	0.962047	Not sig	RSINE1_chr4-154362023-154362163	-	RSINE1	SINE	B4	SINE
8.03267	-0.134059	0.659635	-0.203233	0.838953	0.960494	Not sig	Lx9_chr9-113658785-113659156	+	Lx9	LINE	L1	LINE
14.8411	-0.13572	0.585675	-0.231732	0.816746	0.946172	Not sig	L1MB8_chrX-169057616-169057933	-	L1MB8	LINE	L1	LINE
23.4707	-0.137472	0.517288	-0.265755	0.790428	0.936126	Not sig	MLT1E2_chr9-121756046-121756207	-	MLT1E2	LTR	ERVL-MaLR	ERVL
12.4776	-0.140182	0.564368	-0.248388	0.803834	0.939532	Not sig	L2a_chr4-155498407-155498463	+	L2a	LINE	L2	LINE
9.58446	-0.140369	0.65548	-0.214146	0.830433	0.955043	Not sig	L1Md_A_chr19-55454838-55455060	-	L1Md_A	LINE	L1	LINE
9.35485	-0.140862	0.727037	-0.193748	0.846373	0.960494	Not sig	RMER12B_chr19-55305605-55306405	+	RMER12B	LTR	ERVK	ERVK
11.7095	-0.144009	0.582362	-0.247285	0.804688	0.939532	Not sig	L1_Mus3_chrX-169068873-169069420	+	L1_Mus3	LINE	L1	LINE
6.64265	-0.144996	0.756952	-0.191552	0.848093	0.960494	Not sig	IAPEz-int_chr9-118143516-118144350	+	IAPEz-int	LTR	ERVK	ERVK
7.83581	-0.145194	0.708665	-0.204884	0.837663	0.960494	Not sig	L1MB1_chr13-119783478-119783720	-	L1MB1	LINE	L1	LINE
11.4648	-0.146199	0.625353	-0.233786	0.815151	0.945576	Not sig	L1M2_chr6-140640549-140640681	-	L1M2	LINE	L1	LINE
20.91	-0.148135	0.466537	-0.31752	0.750849	0.922865	Not sig	B2_Mm1t_chr4-155520780-155520959	-	B2_Mm1t	SINE	B2	SINE
9.10442	-0.148788	0.645743	-0.230414	0.81777	0.946567	Not sig	RLTRETN_Mm_chr15-102478879-102479215	-	RLTRETN_Mm	LTR	ERVK	ERVK
11.6839	-0.149472	0.596609	-0.250536	0.802173	0.939532	Not sig	ID_B1_chr15-102351434-102351527	+	ID_B1	SINE	B4	SINE
7.26233	-0.149627	0.775868	-0.192851	0.847075	0.960494	Not sig	B4_chr19-59312770-59313019	+	B4	SINE	B4	SINE
7.2789	-0.150024	0.783292	-0.19153	0.848111	0.960494	Not sig	B1_Mus2_chr15-102481043-102481169	-	B1_Mus2	SINE	Alu	SINE
59.6706	-0.150654	0.369707	-0.407497	0.683643	0.898888	Not sig	L1_Mus3_chr3-159904062-159905434	+	L1_Mus3	LINE	L1	LINE
7.04603	-0.152519	0.777425	-0.196185	0.844466	0.960494	Not sig	L1MC1_chr19-57643951-57644205	-	L1MC1	LINE	L1	LINE
7.6836	-0.15342	0.785589	-0.195293	0.845163	0.960494	Not sig	MTE2a_chr9-118967676-118968064	-	MTE2a	LTR	ERVL-MaLR	ERVL
7.53172	-0.153556	0.75886	-0.202351	0.839643	0.960494	Not sig	B3_chr15-102613094-102613295	-	B3	SINE	B2	SINE
10.1965	-0.156078	0.638824	-0.24432	0.806983	0.940494	Not sig	B1F_chr13-117008575-117008698	+	B1F	SINE	Alu	SINE
12.713	-0.156159	0.559865	-0.278922	0.780304	0.930522	Not sig	Lx8_chr6-146382429-146382504	-	Lx8	LINE	L1	LINE
9.23985	-0.158228	0.639813	-0.247303	0.804674	0.939532	Not sig	B4A_chr6-140558738-140558991	+	B4A	SINE	B4	SINE
14.5737	-0.159437	0.625498	-0.254896	0.798803	0.938791	Not sig	Lx5_chr19-60922126-60923322	-	Lx5	LINE	L1	LINE
29.0118	-0.161518	0.403977	-0.399819	0.68929	0.903063	Not sig	RSINE1_chr6-145768161-145768324	+	RSINE1	SINE	B4	SINE
18.805	-0.162547	0.49216	-0.330271	0.741195	0.921022	Not sig	MTA_Mm-int_chr9-115272193-115273182	+	MTA_Mm-int	LTR	ERVL-MaLR	ERVL
8.75042	-0.162695	0.666905	-0.243956	0.807265	0.940494	Not sig	ORR1B2-int_chr9-118075805-118077159	+	ORR1B2-int	LTR	ERVL-MaLR	ERVL
10.0183	-0.162748	0.685299	-0.237484	0.812281	0.943635	Not sig	B1F2_chr13-119438794-119438903	-	B1F2	SINE	Alu	SINE
10.4678	-0.162887	0.635536	-0.256299	0.79772	0.938545	Not sig	Lx8_chr19-55358419-55358728	+	Lx8	LINE	L1	LINE
49.5129	-0.164603	0.37761	-0.435906	0.662905	0.885912	Not sig	L1_Mur3_chr16-92096535-92097443	+	L1_Mur3	LINE	L1	LINE
20.098	-0.165429	0.561339	-0.294705	0.768219	0.928472	Not sig	ID_B1_chr16-92650752-92650936	-	ID_B1	SINE	B4	SINE
9.46965	-0.165936	0.635514	-0.261105	0.794012	0.937374	Not sig	B3_chr4-155499774-155499930	+	B3	SINE	B2	SINE
15.5617	-0.170187	0.599832	-0.283725	0.776621	0.929748	Not sig	RSINE1_chr6-140653993-140654106	+	RSINE1	SINE	B4	SINE
16.1911	-0.173315	0.568357	-0.30494	0.760412	0.926132	Not sig	RSINE1_chr19-60557758-60557896	+	RSINE1	SINE	B4	SINE
6.5714	-0.173718	0.750657	-0.231421	0.816988	0.946172	Not sig	RSINE1_chr4-155947480-155947619	-	RSINE1	SINE	B4	SINE
22.7248	-0.174946	0.443432	-0.394528	0.693191	0.903762	Not sig	B1F1_chr7-144468176-144468308	+	B1F1	SINE	Alu	SINE
17.5877	-0.176504	0.543166	-0.324954	0.745216	0.921707	Not sig	B4A_chr4-154616776-154617059	-	B4A	SINE	B4	SINE
19.9009	-0.177649	0.476547	-0.372784	0.709309	0.906799	Not sig	B3_chr15-102614933-102615128	-	B3	SINE	B2	SINE
10.4555	-0.177789	0.613402	-0.289841	0.771938	0.928472	Not sig	ORR1C1_chr9-113700339-113700724	+	ORR1C1	LTR	ERVL-MaLR	ERVL
12.2109	-0.179023	0.59766	-0.299539	0.764529	0.927074	Not sig	RSINE1_chr19-60209651-60209814	-	RSINE1	SINE	B4	SINE
7.14069	-0.179072	0.750949	-0.238461	0.811524	0.943635	Not sig	B4A_chr4-154467203-154467453	-	B4A	SINE	B4	SINE
7.73607	-0.18137	0.69557	-0.26075	0.794285	0.937374	Not sig	L1MEg_chr11-121616185-121616348	-	L1MEg	LINE	L1	LINE
17.0263	-0.181922	0.529763	-0.343401	0.731296	0.919363	Not sig	LTR82B_chr19-55521602-55522191	-	LTR82B	LTR	ERVL	ERVL
7.10039	-0.182041	0.794481	-0.229132	0.818766	0.946699	Not sig	PB1D7_chr6-149315859-149315982	+	PB1D7	SINE	Alu	SINE
8.18407	-0.182099	0.712961	-0.255413	0.798404	0.938791	Not sig	MTE2a_chr9-116871565-116871900	+	MTE2a	LTR	ERVL-MaLR	ERVL
12.5198	-0.186756	0.567031	-0.329358	0.741885	0.921346	Not sig	B3_chr13-119432596-119432768	-	B3	SINE	B2	SINE
22.9746	-0.187195	0.483949	-0.386808	0.698898	0.903891	Not sig	B3A_chr4-150242747-150242837	+	B3A	SINE	B2	SINE
8.30676	-0.187259	0.664555	-0.281781	0.778111	0.929748	Not sig	MIR_chr3-159873250-159873352	-	MIR	SINE	MIR	SINE
13.3829	-0.187417	0.551056	-0.340105	0.733777	0.919363	Not sig	L1MB3_chr4-149928345-149928684	+	L1MB3	LINE	L1	LINE
12.4675	-0.189237	0.583214	-0.324473	0.74558	0.921707	Not sig	B1_Mur3_chr9-120128352-120128424	+	B1_Mur3	SINE	Alu	SINE
10.9696	-0.189689	0.621324	-0.305298	0.760139	0.926132	Not sig	ID_B1_chr7-141232014-141232202	-	ID_B1	SINE	B4	SINE
6.61251	-0.190527	0.734809	-0.259287	0.795414	0.937374	Not sig	B2_Mm2_chrX-169039886-169040018	+	B2_Mm2	SINE	B2	SINE
29.8238	-0.192395	0.424411	-0.453322	0.650317	0.881048	Not sig	L1MCa_chr7-143246572-143247245	-	L1MCa	LINE	L1	LINE
36.0851	-0.192657	0.419779	-0.458948	0.646272	0.877784	Not sig	B1F2_chr7-143279824-143279883	+	B1F2	SINE	Alu	SINE
26.5739	-0.194204	0.434698	-0.446757	0.655051	0.882729	Not sig	RSINE1_chrX-162762987-162763136	+	RSINE1	SINE	B4	SINE
14.4685	-0.194409	0.548682	-0.35432	0.723099	0.914709	Not sig	B2_Mm2_chr4-155529873-155530063	-	B2_Mm2	SINE	B2	SINE
6.93536	-0.196337	0.76248	-0.257498	0.796794	0.938486	Not sig	B1_Mur3_chr4-155730571-155730711	-	B1_Mur3	SINE	Alu	SINE
38.5717	-0.196905	0.373032	-0.527849	0.597604	0.845391	Not sig	L1ME1_chr6-145752599-145752790	-	L1ME1	LINE	L1	LINE
11.1263	-0.201297	0.620461	-0.324431	0.745612	0.921707	Not sig	RMER6BA_chr9-123580408-123580867	+	RMER6BA	LTR	ERVK	ERVK
14.4145	-0.203728	0.571574	-0.356434	0.721516	0.914034	Not sig	Lx3_Mus_chr9-113808753-113809802	+	Lx3_Mus	LINE	L1	LINE
7.39312	-0.204561	1.36257	-0.150129	0.880663	0.968105	Not sig	RLTR31D_MM_chr9-123129018-123129289	-	RLTR31D_MM	LTR	ERVK	ERVK
23.5345	-0.208184	0.456971	-0.455574	0.648696	0.879407	Not sig	L1VL4_chr7-143225990-143227122	-	L1VL4	LINE	L1	LINE
11.4164	-0.212667	0.625449	-0.340022	0.73384	0.919363	Not sig	L1_Mus4_chr13-119349172-119349929	+	L1_Mus4	LINE	L1	LINE
10.1507	-0.213187	0.688453	-0.309661	0.756819	0.925603	Not sig	B2_Mm1a_chr4-155497761-155497920	-	B2_Mm1a	SINE	B2	SINE
7.22012	-0.214037	0.754013	-0.283864	0.776515	0.929748	Not sig	MT2B1_chr6-146949022-146949504	+	MT2B1	LTR	ERVL	ERVL
11.335	-0.219732	0.980002	-0.224216	0.822589	0.950607	Not sig	ORR1E_chr4-150324466-150324696	-	ORR1E	LTR	ERVL-MaLR	ERVL
19.4109	-0.219937	0.504422	-0.436018	0.662824	0.885912	Not sig	B4A_chr7-143276702-143276960	-	B4A	SINE	B4	SINE
7.6632	-0.220441	0.693319	-0.31795	0.750523	0.922865	Not sig	B4A_chr9-117218552-117218750	+	B4A	SINE	B4	SINE
44.3253	-0.223869	0.370037	-0.604992	0.545184	0.816445	Not sig	L1_Mus4_chr19-55436468-55439517	+	L1_Mus4	LINE	L1	LINE
48.9593	-0.22401	0.383717	-0.58379	0.559362	0.824164	Not sig	ORR1B2_chr4-155545107-155545442	-	ORR1B2	LTR	ERVL-MaLR	ERVL
10.3739	-0.22408	0.601439	-0.372572	0.709467	0.906799	Not sig	RLTR16B_MM_chr19-57374765-57375429	-	RLTR16B_MM	LTR	ERVK	ERVK
8.03922	-0.225472	0.703194	-0.32064	0.748483	0.922865	Not sig	MIRc_chr6-146432250-146432415	+	MIRc	SINE	MIR	SINE
8.08126	-0.22552	0.741362	-0.304197	0.760978	0.926295	Not sig	MTE2a_chr9-116796371-116796688	+	MTE2a	LTR	ERVL-MaLR	ERVL
7.11524	-0.22644	0.715405	-0.31652	0.751608	0.922902	Not sig	L2a_chr13-119430499-119430571	+	L2a	LINE	L2	LINE
11.1129	-0.226893	0.581756	-0.390015	0.696526	0.903891	Not sig	B3A_chr6-147094103-147094262	+	B3A	SINE	B2	SINE
18.071	-0.2283	0.513263	-0.444801	0.656464	0.882729	Not sig	L1MCa_chr7-143243541-143243800	-	L1MCa	LINE	L1	LINE
6.95781	-0.229584	0.743207	-0.30891	0.75739	0.925603	Not sig	B1_Mur4_chr4-151951461-151951559	+	B1_Mur4	SINE	Alu	SINE
21.9344	-0.229718	0.486524	-0.472161	0.636812	0.871047	Not sig	B2_Mm2_chr4-150858490-150858673	-	B2_Mm2	SINE	B2	SINE
22.1168	-0.233544	0.451886	-0.51682	0.605281	0.852216	Not sig	B1_Mus2_chr4-150857714-150857856	+	B1_Mus2	SINE	Alu	SINE
16.849	-0.236591	0.525002	-0.450647	0.652244	0.881988	Not sig	RodERV21-int_chr7-142016942-142018458	+	RodERV21-int	LTR	ERV1	ERV1
7.8053	-0.237612	0.759997	-0.312648	0.754548	0.924763	Not sig	Lx8_chrX-169206878-169207178	+	Lx8	LINE	L1	LINE
11.6923	-0.239517	0.592776	-0.40406	0.686168	0.900072	Not sig	PB1D7_chr6-147018549-147018645	-	PB1D7	SINE	Alu	SINE
9.53462	-0.239777	0.653506	-0.366909	0.713687	0.910253	Not sig	RMER10A_chr4-147843631-147844053	-	RMER10A	LTR	ERVL	ERVL
12.7692	-0.240003	0.564124	-0.425445	0.670513	0.888222	Not sig	B3A_chr16-91696755-91696941	+	B3A	SINE	B2	SINE
6.77156	-0.243422	0.730556	-0.333201	0.738983	0.920648	Not sig	B1_Mus1_chr4-155822926-155823058	+	B1_Mus1	SINE	Alu	SINE
10.2027	-0.24439	0.621476	-0.393241	0.694142	0.903762	Not sig	B4A_chr16-92665130-92665428	+	B4A	SINE	B4	SINE
29.0496	-0.244777	0.447506	-0.54698	0.584393	0.838867	Not sig	Lx_chr3-159860273-159862290	+	Lx	LINE	L1	LINE
32.5355	-0.246255	0.412274	-0.597308	0.550301	0.821685	Not sig	RLTR20C1_MM_chr6-145774677-145774750	-	RLTR20C1_MM	LTR	ERVK	ERVK
7.15952	-0.24721	0.7944	-0.311191	0.755655	0.925064	Not sig	B3_chr4-145238528-145238721	-	B3	SINE	B2	SINE
11.7325	-0.247959	0.575921	-0.430544	0.6668	0.886714	Not sig	L1MD1_chr7-143278888-143279152	-	L1MD1	LINE	L1	LINE
7.09215	-0.24891	0.847093	-0.293841	0.76888	0.928472	Not sig	B1_Mur2_chr6-146950819-146950940	-	B1_Mur2	SINE	Alu	SINE
13.2869	-0.250309	0.568743	-0.440109	0.659858	0.884482	Not sig	Lx8_chr19-60194946-60195397	+	Lx8	LINE	L1	LINE
11.12	-0.250915	0.601768	-0.416963	0.676706	0.893668	Not sig	L1ME3F_chr16-94374136-94374464	-	L1ME3F	LINE	L1	LINE
15.2834	-0.252349	0.598397	-0.421708	0.673238	0.89093	Not sig	MIR3_chr4-145241872-145241968	-	MIR3	SINE	MIR	SINE
7.97198	-0.252651	0.715973	-0.352877	0.72418	0.914709	Not sig	B4A_chr15-102615791-102616071	+	B4A	SINE	B4	SINE
7.62077	-0.253449	0.746704	-0.339423	0.734291	0.919363	Not sig	ID4__chr9-121723509-121723558	-	ID4_	SINE	ID	SINE
11.0877	-0.25449	0.604251	-0.421166	0.673634	0.89093	Not sig	L2a_chr7-143288236-143288314	+	L2a	LINE	L2	LINE
8.47438	-0.256464	0.648738	-0.395327	0.692601	0.903762	Not sig	B4A_chr4-155708308-155708501	-	B4A	SINE	B4	SINE
19.267	-0.256981	0.524197	-0.490237	0.623966	0.862222	Not sig	L2_chr4-150869841-150869955	-	L2	LINE	L2	LINE
10.6345	-0.257218	0.618247	-0.416044	0.677378	0.894006	Not sig	L1M2_chr19-55547348-55547609	+	L1M2	LINE	L1	LINE
44.0145	-0.258357	0.368601	-0.700911	0.483358	0.771217	Not sig	B3_chr16-92656198-92656402	+	B3	SINE	B2	SINE
22.2945	-0.259849	0.452516	-0.574233	0.56581	0.826864	Not sig	ID_B1_chr7-143271430-143271644	+	ID_B1	SINE	B4	SINE
10.7251	-0.260971	0.611109	-0.427044	0.669347	0.887774	Not sig	B3_chr4-145427954-145428162	+	B3	SINE	B2	SINE
8.88178	-0.261201	0.690081	-0.378508	0.705053	0.903891	Not sig	Lx5_chr6-148934350-148934477	+	Lx5	LINE	L1	LINE
21.8799	-0.264444	0.445617	-0.593433	0.552892	0.821844	Not sig	B1F2_chr4-150293730-150293875	+	B1F2	SINE	Alu	SINE
8.69364	-0.267805	0.705324	-0.379691	0.704175	0.903891	Not sig	B2_Mm2_chr9-118943164-118943354	-	B2_Mm2	SINE	B2	SINE
25.077	-0.269692	0.504169	-0.534924	0.592702	0.843461	Not sig	Lx8_chr18-90535104-90535419	-	Lx8	LINE	L1	LINE
10.6066	-0.27046	0.664816	-0.406819	0.684141	0.898888	Not sig	ORR1E_chr6-145762619-145762783	-	ORR1E	LTR	ERVL-MaLR	ERVL
9.32635	-0.271794	0.632307	-0.429846	0.667308	0.886714	Not sig	B3A_chr16-92817000-92817158	+	B3A	SINE	B2	SINE
10.8384	-0.272956	0.605227	-0.450998	0.651991	0.881988	Not sig	B3_chr4-148619540-148619683	-	B3	SINE	B2	SINE
7.26571	-0.273492	0.778492	-0.35131	0.725356	0.915117	Not sig	B4A_chr4-148475673-148475954	+	B4A	SINE	B4	SINE
16.1719	-0.2735	0.501115	-0.545783	0.585215	0.839486	Not sig	B4A_chr16-91739107-91739385	-	B4A	SINE	B4	SINE
6.66251	-0.275762	0.819244	-0.336606	0.736414	0.920648	Not sig	MuRRS-int_chrX-169137238-169137457	-	MuRRS-int	LTR	ERV1	ERV1
8.00133	-0.276873	0.711019	-0.389403	0.696978	0.903891	Not sig	B3_chr4-145437733-145437945	+	B3	SINE	B2	SINE
14.3251	-0.277367	0.557263	-0.497731	0.618673	0.857736	Not sig	B2_Mm1t_chr6-140538353-140538529	-	B2_Mm1t	SINE	B2	SINE
12.8502	-0.278918	0.590787	-0.472112	0.636847	0.871047	Not sig	IAPEY_LTR_chr6-145018688-145019016	+	IAPEY_LTR	LTR	ERVK	ERVK
8.93722	-0.27947	0.687627	-0.406427	0.684429	0.898888	Not sig	RMER6A_chr15-102567681-102568429	-	RMER6A	LTR	ERVK	ERVK
6.83103	-0.279648	0.768769	-0.36376	0.716037	0.911938	Not sig	B4A_chr5-151099129-151099251	-	B4A	SINE	B4	SINE
7.08602	-0.282038	0.740001	-0.381132	0.703105	0.903891	Not sig	ORR1C2_chr4-145060133-145060511	+	ORR1C2	LTR	ERVL-MaLR	ERVL
7.6648	-0.284869	0.71796	-0.396776	0.691533	0.903762	Not sig	Lx_chr13-117712899-117713723	-	Lx	LINE	L1	LINE
18.531	-0.287176	0.482026	-0.595768	0.55133	0.821685	Not sig	RLTR12A_chr4-156003658-156004216	-	RLTR12A	LTR	ERVK	ERVK
7.67174	-0.288198	0.789039	-0.365252	0.714923	0.91106	Not sig	B1_Mus1_chr15-102093893-102094019	-	B1_Mus1	SINE	Alu	SINE
8.82725	-0.29004	0.656459	-0.441825	0.658616	0.883368	Not sig	B4A_chr4-145036005-145036265	+	B4A	SINE	B4	SINE
15.7896	-0.291091	0.53917	-0.539887	0.589275	0.841373	Not sig	PB1D10_chr6-146998405-146998505	+	PB1D10	SINE	Alu	SINE
12.4741	-0.29256	0.587494	-0.49798	0.618498	0.857736	Not sig	MERVL_2A-int_chr9-123094301-123095738	-	MERVL_2A-int	LTR	ERVL	ERVL
16.1231	-0.293707	0.521906	-0.562759	0.573599	0.828426	Not sig	RSINE1_chr4-150066275-150066413	-	RSINE1	SINE	B4	SINE
9.34127	-0.294297	0.654082	-0.44994	0.652754	0.882122	Not sig	ORR1B1_chr13-116901849-116902188	+	ORR1B1	LTR	ERVL-MaLR	ERVL
8.12764	-0.295783	0.673131	-0.439414	0.660362	0.884605	Not sig	PB1D10_chr9-123583791-123583935	-	PB1D10	SINE	Alu	SINE
12.9533	-0.297087	0.538234	-0.551967	0.580971	0.835632	Not sig	MIRb_chr16-94382632-94382841	+	MIRb	SINE	MIR	SINE
7.25167	-0.297673	0.766822	-0.38819	0.697876	0.903891	Not sig	B2_Mm2_chr11-121298249-121298440	-	B2_Mm2	SINE	B2	SINE
9.75265	-0.302345	0.620343	-0.487383	0.625987	0.863798	Not sig	ORR1C1_chr6-146585892-146586194	-	ORR1C1	LTR	ERVL-MaLR	ERVL
8.65108	-0.302621	0.682508	-0.443396	0.657479	0.883368	Not sig	B1_Mus1_chr4-147844964-147845110	+	B1_Mus1	SINE	Alu	SINE
15.4069	-0.302697	0.506706	-0.597382	0.550252	0.821685	Not sig	MTD_chr16-94623748-94624112	+	MTD	LTR	ERVL-MaLR	ERVL
9.09768	-0.303114	0.658535	-0.460286	0.645311	0.877784	Not sig	MTA_Mm-int_chr4-151942983-151944077	-	MTA_Mm-int	LTR	ERVL-MaLR	ERVL
16.6292	-0.303938	0.541456	-0.561334	0.57457	0.828971	Not sig	MT2B2_chr16-94619847-94620298	+	MT2B2	LTR	ERVL	ERVL
6.65606	-0.304446	0.789551	-0.385594	0.699797	0.903891	Not sig	B2_Mm2_chr16-94446851-94447008	-	B2_Mm2	SINE	B2	SINE
7.46904	-0.307381	0.716736	-0.428862	0.668024	0.887116	Not sig	RSINE1_chr4-150602560-150602643	-	RSINE1	SINE	B4	SINE
46.6521	-0.308829	0.356617	-0.865998	0.386491	0.693534	Not sig	MIR_chr16-92633344-92633523	-	MIR	SINE	MIR	SINE
13.3188	-0.310856	0.530864	-0.585566	0.558167	0.824164	Not sig	RLTR19_chr9-114521767-114522128	+	RLTR19	LTR	ERVK	ERVK
24.071	-0.311141	0.488474	-0.636966	0.524147	0.801177	Not sig	MTE2a_chr4-150244587-150244871	-	MTE2a	LTR	ERVL-MaLR	ERVL
13.6188	-0.312326	0.547025	-0.570954	0.568031	0.827233	Not sig	Lx2_chr3-159501359-159505818	-	Lx2	LINE	L1	LINE
8.67498	-0.316324	0.659839	-0.479396	0.631657	0.867883	Not sig	B3_chr6-140495922-140496101	+	B3	SINE	B2	SINE
28.4836	-0.317224	0.407063	-0.779299	0.435804	0.731223	Not sig	ORR1A4-int_chr6-148185507-148187634	+	ORR1A4-int	LTR	ERVL-MaLR	ERVL
9.64256	-0.319458	0.622366	-0.513297	0.607744	0.852528	Not sig	Lx8_chr4-145042240-145042496	+	Lx8	LINE	L1	LINE
13.6101	-0.320532	0.598188	-0.535838	0.592071	0.843121	Not sig	B4_chr16-92634256-92634509	+	B4	SINE	B4	SINE
11.5959	-0.320806	0.622696	-0.515188	0.606422	0.852247	Not sig	B4_chr16-92673714-92673989	-	B4	SINE	B4	SINE
10.6907	-0.321085	0.6598	-0.48664	0.626513	0.863798	Not sig	B1_Mur1_chr9-115286510-115286645	-	B1_Mur1	SINE	Alu	SINE
10.3056	-0.325658	0.649989	-0.50102	0.616357	0.857736	Not sig	MIRc_chr4-145014751-145014871	+	MIRc	SINE	MIR	SINE
14.3724	-0.32616	0.517957	-0.629705	0.528888	0.80496	Not sig	L1MB3_chr5-151186731-151186901	+	L1MB3	LINE	L1	LINE
8.973	-0.326781	0.658107	-0.496547	0.619508	0.857736	Not sig	B1_Mur3_chr4-150319558-150319712	-	B1_Mur3	SINE	Alu	SINE
8.09935	-0.332189	0.705976	-0.470539	0.63797	0.872028	Not sig	RMER10B_chr4-147847430-147847627	+	RMER10B	LTR	ERVL	ERVL
8.37595	-0.332369	0.712686	-0.466361	0.640957	0.874996	Not sig	PB1D7_chr13-119431485-119431572	-	PB1D7	SINE	Alu	SINE
11.7764	-0.333849	0.590797	-0.565083	0.572017	0.828426	Not sig	B3_chr4-145008674-145008873	+	B3	SINE	B2	SINE
8.72643	-0.338697	0.680741	-0.497541	0.618808	0.857736	Not sig	B4A_chr4-150426402-150426501	+	B4A	SINE	B4	SINE
20.0673	-0.338918	0.529012	-0.640662	0.521742	0.800149	Not sig	B4_chr9-118541976-118542229	+	B4	SINE	B4	SINE
8.78249	-0.339261	0.63744	-0.532224	0.594571	0.843881	Not sig	L1Md_F2_chr13-117759753-117761571	+	L1Md_F2	LINE	L1	LINE
25.126	-0.340863	0.466113	-0.731287	0.464604	0.75419	Not sig	IAPEz-int_chr4-147833852-147840309	-	IAPEz-int	LTR	ERVK	ERVK
12.6286	-0.342006	0.578273	-0.591427	0.554234	0.821967	Not sig	Lx7_chr16-94594607-94595676	-	Lx7	LINE	L1	LINE
13.3832	-0.34412	0.557747	-0.616981	0.537247	0.811042	Not sig	L1MB7_chr9-121424061-121424327	-	L1MB7	LINE	L1	LINE
18.7814	-0.345996	0.492765	-0.702152	0.482585	0.770556	Not sig	L1_Mus2_chrX-169051280-169052167	-	L1_Mus2	LINE	L1	LINE
24.9654	-0.347028	0.429974	-0.807091	0.419614	0.723287	Not sig	L1Md_T_chr6-146918826-146925061	-	L1Md_T	LINE	L1	LINE
10.7303	-0.349183	0.606208	-0.576012	0.564607	0.826864	Not sig	L1MB5_chr19-55462618-55462955	-	L1MB5	LINE	L1	LINE
26.4917	-0.35295	0.446066	-0.791251	0.428797	0.728887	Not sig	RLTR31D_MM_chr4-155516727-155517061	+	RLTR31D_MM	LTR	ERVK	ERVK
8.01543	-0.35594	0.75859	-0.469212	0.638918	0.872768	Not sig	Lx2B_chr4-145029088-145030086	+	Lx2B	LINE	L1	LINE
47.0189	-0.356848	0.396015	-0.901097	0.367537	0.678506	Not sig	Lx8_chr19-59305654-59305925	+	Lx8	LINE	L1	LINE
9.72452	-0.358066	0.681923	-0.525083	0.599525	0.846435	Not sig	L2_chrX-162155397-162155758	+	L2	LINE	L2	LINE
15.2888	-0.358999	0.608906	-0.589581	0.555472	0.822666	Not sig	B1_Mur4_chr4-152248401-152248538	-	B1_Mur4	SINE	Alu	SINE
6.63379	-0.359349	0.751468	-0.478196	0.632511	0.867883	Not sig	MIR3_chr16-84704003-84704140	-	MIR3	SINE	MIR	SINE
10.002	-0.359991	0.617061	-0.583397	0.559626	0.824164	Not sig	ORR1C2_chr19-56559913-56560264	-	ORR1C2	LTR	ERVL-MaLR	ERVL
16.6311	-0.361679	0.534847	-0.676228	0.498896	0.782869	Not sig	B4_chr13-119353014-119353304	-	B4	SINE	B4	SINE
11.1561	-0.36174	0.642389	-0.563118	0.573355	0.828426	Not sig	B3A_chr9-114517278-114517444	-	B3A	SINE	B2	SINE
10.0651	-0.36258	0.62194	-0.582982	0.559906	0.824164	Not sig	Lx8_chr6-145766248-145766393	-	Lx8	LINE	L1	LINE
7.88499	-0.362783	0.719663	-0.504101	0.61419	0.855878	Not sig	Lx4A_chrX-169152511-169152675	-	Lx4A	LINE	L1	LINE
20.6546	-0.363141	0.484667	-0.749259	0.453701	0.747641	Not sig	B1_Mur1_chr6-145754667-145754770	+	B1_Mur1	SINE	Alu	SINE
10.1407	-0.365202	0.637081	-0.573242	0.566481	0.826864	Not sig	B4A_chr6-140496756-140496984	+	B4A	SINE	B4	SINE
37.7512	-0.365998	0.414974	-0.881978	0.377788	0.687063	Not sig	L1MC4a_chr9-113701544-113701965	+	L1MC4a	LINE	L1	LINE
9.76088	-0.367777	0.727144	-0.505783	0.613009	0.855343	Not sig	MIRb_chr16-92616731-92616841	+	MIRb	SINE	MIR	SINE
7.3382	-0.372425	0.698899	-0.532875	0.59412	0.843872	Not sig	L1MA6_chr19-55822500-55822800	+	L1MA6	LINE	L1	LINE
10.9805	-0.374268	0.58867	-0.635785	0.524917	0.801189	Not sig	B3A_chr4-154417821-154417957	-	B3A	SINE	B2	SINE
9.32916	-0.376785	1.12526	-0.334842	0.737745	0.920648	Not sig	B1_Mur1_chr7-144549092-144549223	-	B1_Mur1	SINE	Alu	SINE
10.6017	-0.3771	0.607547	-0.620693	0.534802	0.809369	Not sig	MIR3_chr16-92660078-92660219	-	MIR3	SINE	MIR	SINE
7.18692	-0.377517	0.847036	-0.445691	0.65582	0.882729	Not sig	RSINE1_chr9-113902598-113902753	+	RSINE1	SINE	B4	SINE
27.36	-0.378833	0.46169	-0.820536	0.411911	0.714023	Not sig	ORR1A2_chr6-148192944-148193121	+	ORR1A2	LTR	ERVL-MaLR	ERVL
7.97529	-0.382314	0.71729	-0.532997	0.594035	0.843872	Not sig	B2_Mm1t_chr16-94391616-94391808	-	B2_Mm1t	SINE	B2	SINE
11.3171	-0.383382	0.569147	-0.673609	0.50056	0.784089	Not sig	B2_Mm2_chr19-60770533-60770723	+	B2_Mm2	SINE	B2	SINE
17.1813	-0.384318	0.50476	-0.761387	0.446426	0.742927	Not sig	B1_Mur1_chr16-94628183-94628297	+	B1_Mur1	SINE	Alu	SINE
7.08209	-0.387023	0.814962	-0.474897	0.63486	0.87055	Not sig	Lx4B_chr4-155719851-155720037	-	Lx4B	LINE	L1	LINE
7.01336	-0.390747	0.783964	-0.498425	0.618185	0.857736	Not sig	ORR1A1_chr4-150390276-150390583	-	ORR1A1	LTR	ERVL-MaLR	ERVL
8.7248	-0.39328	0.683415	-0.575463	0.564978	0.826864	Not sig	MIRb_chr19-55528073-55528205	-	MIRb	SINE	MIR	SINE
14.146	-0.394423	0.641206	-0.615126	0.538471	0.811854	Not sig	RSINE1_chr7-143230578-143230747	-	RSINE1	SINE	B4	SINE
17.6417	-0.396215	0.516274	-0.767451	0.442813	0.738366	Not sig	B3_chr5-151083422-151083624	+	B3	SINE	B2	SINE
15.9555	-0.397291	0.533069	-0.74529	0.456096	0.749451	Not sig	L1M5_chr7-143293488-143293931	-	L1M5	LINE	L1	LINE
31.1917	-0.397297	0.410385	-0.968107	0.332991	0.647154	Not sig	RLTR11B_chr16-94615586-94616033	-	RLTR11B	LTR	ERVK	ERVK
17.6836	-0.397659	0.565959	-0.70263	0.482287	0.770556	Not sig	Lx_chr9-119276884-119277972	-	Lx	LINE	L1	LINE
11.2694	-0.398607	0.584664	-0.681772	0.495383	0.782869	Not sig	MTD_chr4-150326282-150326617	+	MTD	LTR	ERVL-MaLR	ERVL
22.1742	-0.398622	0.462376	-0.862116	0.388624	0.694667	Not sig	B2_Mm2_chr4-155507860-155508034	-	B2_Mm2	SINE	B2	SINE
31.9074	-0.399295	0.418867	-0.953273	0.340452	0.650008	Not sig	Lx8b_chr3-159902519-159903144	+	Lx8b	LINE	L1	LINE
7.39471	-0.400733	0.761495	-0.526245	0.598718	0.846251	Not sig	B4A_chr4-154606194-154606462	-	B4A	SINE	B4	SINE
16.7162	-0.40089	0.515339	-0.777914	0.43662	0.73202	Not sig	Lx8_chr11-121569582-121571918	+	Lx8	LINE	L1	LINE
19.1893	-0.401284	0.557351	-0.719983	0.471535	0.761451	Not sig	RSINE1_chr4-155511752-155511884	+	RSINE1	SINE	B4	SINE
6.57174	-0.403009	0.766411	-0.525839	0.599	0.846251	Not sig	ORR1F_chr6-142759186-142759348	+	ORR1F	LTR	ERVL-MaLR	ERVL
11.1208	-0.405116	0.636802	-0.636173	0.524664	0.801189	Not sig	L1M2_chr4-150480840-150480997	+	L1M2	LINE	L1	LINE
7.15688	-0.405116	0.787402	-0.514497	0.606904	0.852367	Not sig	L2a_chr19-60530649-60530945	+	L2a	LINE	L2	LINE
16.0433	-0.405187	0.499862	-0.810597	0.417597	0.720968	Not sig	MT2A_chr4-150344726-150345210	+	MT2A	LTR	ERVL	ERVL
10.5448	-0.409165	0.619629	-0.660339	0.509036	0.790465	Not sig	B2_Mm2_chr4-150340033-150340227	-	B2_Mm2	SINE	B2	SINE
7.82517	-0.412839	0.723371	-0.570715	0.568193	0.827233	Not sig	L1ME1_chr4-155194722-155194917	+	L1ME1	LINE	L1	LINE
7.33432	-0.413061	1.37367	-0.300698	0.763644	0.927074	Not sig	L1Md_F2_chr13-116977917-116978607	+	L1Md_F2	LINE	L1	LINE
15.588	-0.415553	0.524631	-0.792086	0.428311	0.728887	Not sig	RLTR13C2_chr6-140458312-140459082	-	RLTR13C2	LTR	ERVK	ERVK
9.60849	-0.419322	0.626851	-0.668934	0.503538	0.786457	Not sig	ORR1A4_chr17-94815336-94815669	-	ORR1A4	LTR	ERVL-MaLR	ERVL
6.62163	-0.420207	0.776192	-0.541371	0.588252	0.841373	Not sig	L2_chr4-155068334-155068424	-	L2	LINE	L2	LINE
7.71791	-0.422389	0.78091	-0.540893	0.588581	0.841373	Not sig	MMETn-int_chr10-130551443-130555814	-	MMETn-int	LTR	ERVK	ERVK
6.96225	-0.423098	1.24493	-0.339857	0.733964	0.919363	Not sig	B1_Mus1_chr6-145775785-145775937	-	B1_Mus1	SINE	Alu	SINE
10.2516	-0.42474	0.634729	-0.669167	0.503389	0.786457	Not sig	HAL1_chr4-145005801-145006007	+	HAL1	LINE	L1	LINE
10.6707	-0.425983	0.665431	-0.640161	0.522068	0.800149	Not sig	MLT1B_chr4-154551823-154552161	+	MLT1B	LTR	ERVL-MaLR	ERVL
18.6809	-0.431015	0.526771	-0.818221	0.413231	0.715314	Not sig	ID_B1_chrX-163957667-163957857	+	ID_B1	SINE	B4	SINE
11.0882	-0.431644	0.590992	-0.730371	0.465163	0.754528	Not sig	L1_Mus2_chr3-159877162-159878110	-	L1_Mus2	LINE	L1	LINE
13.9096	-0.432815	0.563164	-0.768542	0.442166	0.737859	Not sig	PB1D7_chr13-117010420-117010517	-	PB1D7	SINE	Alu	SINE
12.6499	-0.433703	0.584948	-0.741438	0.458428	0.750982	Not sig	B3_chr15-102084820-102084990	+	B3	SINE	B2	SINE
21.3442	-0.436234	0.551942	-0.790362	0.429316	0.728887	Not sig	Lx5_chr3-159929523-159929670	-	Lx5	LINE	L1	LINE
14.6368	-0.436591	0.560059	-0.779544	0.435659	0.731223	Not sig	Lx8b_chr3-159901993-159902437	-	Lx8b	LINE	L1	LINE
6.67991	-0.439166	0.754164	-0.582322	0.56035	0.824202	Not sig	ORR1D1_chr19-60898539-60898822	-	ORR1D1	LTR	ERVL-MaLR	ERVL
21.179	-0.440135	0.511679	-0.860178	0.389691	0.694667	Not sig	Lx3_Mus_chr7-143236090-143236887	-	Lx3_Mus	LINE	L1	LINE
8.13948	-0.441059	0.692463	-0.636942	0.524162	0.801177	Not sig	MLT1A0_chr13-119759731-119759903	-	MLT1A0	LTR	ERVL-MaLR	ERVL
14.5188	-0.441637	0.564655	-0.782136	0.434135	0.731155	Not sig	RLTR11A2_chr1-195104374-195104879	+	RLTR11A2	LTR	ERVK	ERVK
14.1545	-0.444523	0.590283	-0.753068	0.451409	0.747472	Not sig	MIR_chr4-155218934-155219024	-	MIR	SINE	MIR	SINE
6.84968	-0.445481	0.754469	-0.590457	0.554884	0.822363	Not sig	B3_chr9-122855784-122855985	+	B3	SINE	B2	SINE
7.49959	-0.449456	0.702611	-0.639694	0.522372	0.800149	Not sig	MIRb_chr4-154397081-154397211	+	MIRb	SINE	MIR	SINE
11.1467	-0.449991	0.618526	-0.727521	0.466907	0.756213	Not sig	B1_Mur2_chr13-119785317-119785428	+	B1_Mur2	SINE	Alu	SINE
33.048	-0.450531	0.482853	-0.933061	0.350788	0.662655	Not sig	L1Md_F2_chr7-143671684-143675661	-	L1Md_F2	LINE	L1	LINE
20.7225	-0.452226	0.502945	-0.899156	0.36857	0.678506	Not sig	B4A_chr19-60775073-60775209	+	B4A	SINE	B4	SINE
7.79076	-0.453465	0.717437	-0.632063	0.527346	0.803183	Not sig	B2_Mm1t_chr4-155499391-155499564	+	B2_Mm1t	SINE	B2	SINE
8.79578	-0.453491	0.693217	-0.654184	0.512993	0.793716	Not sig	Lx8_chr4-155876570-155876989	-	Lx8	LINE	L1	LINE
10.9122	-0.455433	0.655721	-0.694553	0.487335	0.773966	Not sig	B1_Mur4_chr19-56791219-56791341	-	B1_Mur4	SINE	Alu	SINE
8.27724	-0.459835	0.714044	-0.643987	0.519584	0.799456	Not sig	B4A_chr9-116173466-116173705	-	B4A	SINE	B4	SINE
6.65636	-0.461747	0.779586	-0.592298	0.553651	0.821905	Not sig	MTB_chr16-97942515-97942847	-	MTB	LTR	ERVL-MaLR	ERVL
13.5508	-0.465407	0.566988	-0.82084	0.411737	0.714023	Not sig	L1_Mm_chrY-90802053-90802737	-	L1_Mm	LINE	L1	LINE
11.4394	-0.467072	0.596492	-0.783032	0.433608	0.730969	Not sig	RLTR11B_chr19-61126438-61126900	+	RLTR11B	LTR	ERVK	ERVK
7.6243	-0.468001	0.734584	-0.637097	0.524062	0.801177	Not sig	PB1D9_chr4-155503854-155503959	-	PB1D9	SINE	Alu	SINE
42.1783	-0.46931	0.454661	-1.03222	0.301969	0.618663	Not sig	ID_B1_chr6-145759599-145759658	+	ID_B1	SINE	B4	SINE
7.93169	-0.470217	0.693685	-0.677854	0.497864	0.782869	Not sig	Lx9_chr11-121572675-121573114	+	Lx9	LINE	L1	LINE
12.6479	-0.473264	0.578518	-0.818062	0.413322	0.715314	Not sig	L1MA4_chr6-140479739-140480290	+	L1MA4	LINE	L1	LINE
6.87087	-0.475883	0.815982	-0.583203	0.559757	0.824164	Not sig	RSINE1_chr6-145805493-145805616	+	RSINE1	SINE	B4	SINE
7.10317	-0.476145	0.721086	-0.660317	0.509051	0.790465	Not sig	B3_chr16-96017164-96017313	-	B3	SINE	B2	SINE
8.28466	-0.477384	0.667275	-0.715423	0.474348	0.764227	Not sig	ORR1F_chr19-55398619-55398870	+	ORR1F	LTR	ERVL-MaLR	ERVL
7.6876	-0.478304	0.714324	-0.669589	0.50312	0.786457	Not sig	ID_B1_chr4-149259069-149259215	-	ID_B1	SINE	B4	SINE
8.94115	-0.478423	0.678675	-0.704937	0.48085	0.770556	Not sig	B1_Mus1_chr6-148213837-148213984	-	B1_Mus1	SINE	Alu	SINE
18.1373	-0.479897	0.529225	-0.906792	0.364517	0.678469	Not sig	L2c_chr16-91663659-91663879	+	L2c	LINE	L2	LINE
15.6041	-0.481901	0.517955	-0.930393	0.352168	0.663523	Not sig	B4_chr6-142758312-142758591	+	B4	SINE	B4	SINE
17.4119	-0.482299	0.53527	-0.901038	0.367568	0.678506	Not sig	L1M2_chr6-145791294-145791377	+	L1M2	LINE	L1	LINE
73.5071	-0.48736	0.357128	-1.36466	0.172358	0.478399	Not sig	L1Md_F3_chr17-93000000-93000044	+	L1Md_F3	LINE	L1	LINE
10.2935	-0.487727	0.600987	-0.811543	0.417054	0.72061	Not sig	B4A_chr13-119761062-119761298	-	B4A	SINE	B4	SINE
54.9931	-0.489809	0.403306	-1.21449	0.224562	0.548556	Not sig	B1F_chr15-102471976-102472063	+	B1F	SINE	Alu	SINE
8.91959	-0.49304	0.692687	-0.71178	0.476601	0.766245	Not sig	ID_B1_chr4-154517271-154517468	-	ID_B1	SINE	B4	SINE
12.1153	-0.49384	0.552596	-0.893672	0.371497	0.680705	Not sig	RSINE1_chr6-142772392-142772548	+	RSINE1	SINE	B4	SINE
12.2143	-0.49419	0.601167	-0.822051	0.411048	0.714023	Not sig	L1Md_F2_chr5-151125229-151125795	+	L1Md_F2	LINE	L1	LINE
28.1568	-0.494898	0.817677	-0.605249	0.545013	0.816445	Not sig	PB1D10_chr4-150864577-150864663	-	PB1D10	SINE	Alu	SINE
13.0564	-0.49588	0.572643	-0.86595	0.386518	0.693534	Not sig	B1F2_chrX-162766195-162766322	+	B1F2	SINE	Alu	SINE
8.14689	-0.496841	0.740217	-0.67121	0.502087	0.785907	Not sig	L1Md_F2_chr19-61104710-61106950	-	L1Md_F2	LINE	L1	LINE
7.2979	-0.498767	0.774684	-0.643833	0.519684	0.799456	Not sig	MIRc_chr19-55527777-55527925	-	MIRc	SINE	MIR	SINE
9.72305	-0.499077	0.630413	-0.791667	0.428555	0.728887	Not sig	MTE2a_chr9-117223299-117223661	-	MTE2a	LTR	ERVL-MaLR	ERVL
15.8763	-0.499308	0.498212	-1.0022	0.316247	0.63142	Not sig	ORR1D1_chr9-116941749-116942146	+	ORR1D1	LTR	ERVL-MaLR	ERVL
15.7067	-0.502227	0.5343	-0.939973	0.347232	0.65885	Not sig	RMER17C_chr4-150490662-150490845	-	RMER17C	LTR	ERVK	ERVK
17.5073	-0.503159	0.523177	-0.961738	0.336181	0.648199	Not sig	MTEb_chr6-145796690-145797036	-	MTEb	LTR	ERVL-MaLR	ERVL
9.424	-0.503671	0.669586	-0.752212	0.451924	0.747641	Not sig	RSINE1_chr4-154435417-154435555	-	RSINE1	SINE	B4	SINE
10.0851	-0.506403	1.0696	-0.473452	0.635891	0.871047	Not sig	L1Md_F2_chr3-159849528-159849721	-	L1Md_F2	LINE	L1	LINE
13.0932	-0.506457	0.548495	-0.923358	0.355821	0.668059	Not sig	B4_chr9-117233863-117234128	-	B4	SINE	B4	SINE
6.79962	-0.506652	0.811202	-0.624569	0.532254	0.807221	Not sig	B3A_chr9-119899856-119900046	+	B3A	SINE	B2	SINE
9.15731	-0.507077	0.707047	-0.717175	0.473266	0.763057	Not sig	L4_A_Mam_chr5-151057766-151058020	-	L4_A_Mam	LINE	RTE-X	LINE
12.8979	-0.507336	0.585442	-0.866586	0.386169	0.693534	Not sig	Lx8_chr16-85160060-85160621	+	Lx8	LINE	L1	LINE
10.0285	-0.511854	0.692225	-0.739433	0.459644	0.751714	Not sig	B3A_chr4-145015189-145015346	-	B3A	SINE	B2	SINE
9.23819	-0.513523	0.646265	-0.794601	0.426846	0.728149	Not sig	ORR1A4_chr6-148187634-148187942	+	ORR1A4	LTR	ERVL-MaLR	ERVL
13.714	-0.515107	0.535085	-0.962665	0.335716	0.647883	Not sig	B4A_chr16-85053602-85053748	-	B4A	SINE	B4	SINE
12.3573	-0.515155	0.577926	-0.891387	0.372722	0.680733	Not sig	L1_Mm_chrX-169976757-169976898	+	L1_Mm	LINE	L1	LINE
15.7355	-0.515946	0.598021	-0.862757	0.388271	0.694667	Not sig	L1MB8_chrX-169067570-169067767	-	L1MB8	LINE	L1	LINE
22.3219	-0.516599	0.436479	-1.18356	0.236587	0.559158	Not sig	B4A_chr16-94581195-94581450	-	B4A	SINE	B4	SINE
32.4677	-0.51864	0.394034	-1.31623	0.188096	0.501432	Not sig	Lx3_Mus_chr6-145771788-145772631	+	Lx3_Mus	LINE	L1	LINE
79.8173	-0.518928	0.317028	-1.63685	0.101661	0.367901	Not sig	Lx3_Mus_chr6-145771259-145771788	-	Lx3_Mus	LINE	L1	LINE
10.0851	-0.525827	0.68012	-0.773138	0.439441	0.736175	Not sig	B2_Mm2_chr16-94610280-94610471	-	B2_Mm2	SINE	B2	SINE
12.3794	-0.525991	0.624257	-0.842587	0.39946	0.703004	Not sig	RLTR11A_chr6-148793835-148794352	+	RLTR11A	LTR	ERVK	ERVK
12.3135	-0.52877	0.620771	-0.851795	0.394328	0.698208	Not sig	B3A_chr4-154418992-154419197	+	B3A	SINE	B2	SINE
7.20949	-0.529179	0.753086	-0.702681	0.482255	0.770556	Not sig	B1_Mm_chr19-60770342-60770481	-	B1_Mm	SINE	Alu	SINE
8.16727	-0.533471	0.669304	-0.797053	0.42542	0.727084	Not sig	PB1D9_chr16-91677073-91677162	-	PB1D9	SINE	Alu	SINE
9.34956	-0.533634	0.642593	-0.830438	0.406291	0.708862	Not sig	MIR_chr16-94381560-94381790	-	MIR	SINE	MIR	SINE
17.4934	-0.534051	0.550788	-0.969613	0.33224	0.646406	Not sig	B3A_chr16-92689539-92689735	-	B3A	SINE	B2	SINE
19.6573	-0.534526	0.459776	-1.16258	0.245	0.567247	Not sig	MTEb-int_chr19-59322779-59323679	+	MTEb-int	LTR	ERVL-MaLR	ERVL
17.5244	-0.534537	0.507957	-1.05233	0.29265	0.613907	Not sig	MT2B_chr4-150857673-150857809	+	MT2B	LTR	ERVL	ERVL
29.5	-0.534601	0.42575	-1.25567	0.209237	0.525787	Not sig	RMER6A_chr4-145413140-145413905	-	RMER6A	LTR	ERVK	ERVK
16.9239	-0.534806	0.527745	-1.01338	0.310879	0.627018	Not sig	RMER17C_chr16-92669582-92669987	+	RMER17C	LTR	ERVK	ERVK
15.6547	-0.53632	0.596852	-0.898582	0.368876	0.678506	Not sig	B3_chr4-156004506-156004699	+	B3	SINE	B2	SINE
7.15497	-0.537338	0.809848	-0.663505	0.507007	0.789782	Not sig	RSINE1_chr9-116137352-116137511	-	RSINE1	SINE	B4	SINE
52.1409	-0.539147	0.358127	-1.50546	0.132205	0.416611	Not sig	L1Md_F2_chr4-145418892-145425116	-	L1Md_F2	LINE	L1	LINE
15.1303	-0.541826	0.504472	-1.07405	0.282802	0.602077	Not sig	Lx9_chr9-120937483-120937962	+	Lx9	LINE	L1	LINE
8.00523	-0.542421	0.739727	-0.733272	0.463392	0.753364	Not sig	RMER17B_chr19-60963720-60964693	+	RMER17B	LTR	ERVK	ERVK
7.32192	-0.544299	0.720721	-0.755214	0.45012	0.745914	Not sig	RMER19B_chr9-116886807-116887733	+	RMER19B	LTR	ERVK	ERVK
36.5535	-0.546836	0.433117	-1.26256	0.206748	0.523538	Not sig	RSINE1_chr7-144452734-144452873	+	RSINE1	SINE	B4	SINE
10.2102	-0.548236	0.63718	-0.860409	0.389564	0.694667	Not sig	B3A_chr15-102528065-102528262	-	B3A	SINE	B2	SINE
11.6766	-0.548524	0.574152	-0.955365	0.339393	0.649532	Not sig	LTRIS6_chrX-169136879-169137238	-	LTRIS6	LTR	ERV1	ERV1
11.799	-0.550371	0.566589	-0.971375	0.331361	0.646281	Not sig	PB1D10_chr16-94618925-94619037	-	PB1D10	SINE	Alu	SINE
6.82715	-0.552335	0.832708	-0.663299	0.507139	0.789782	Not sig	PB1D7_chr16-92679102-92679189	+	PB1D7	SINE	Alu	SINE
15.6944	-0.553008	0.506505	-1.09181	0.274916	0.592339	Not sig	B4A_chr9-121735596-121735841	-	B4A	SINE	B4	SINE
8.44512	-0.557271	0.66749	-0.834876	0.403788	0.706594	Not sig	Lx9_chr3-159879475-159879737	-	Lx9	LINE	L1	LINE
9.65237	-0.559581	0.625408	-0.894746	0.370923	0.680342	Not sig	L1_Mus2_chr1-194948095-194948731	-	L1_Mus2	LINE	L1	LINE
13.743	-0.561673	0.537312	-1.04534	0.295866	0.616322	Not sig	L1MD_chr6-145753121-145753180	-	L1MD	LINE	L1	LINE
8.02373	-0.563416	0.705646	-0.79844	0.424615	0.727084	Not sig	B3_chr9-115265355-115265528	-	B3	SINE	B2	SINE
8.00312	-0.564755	0.704435	-0.801713	0.422719	0.726772	Not sig	Lx7_chr19-56581377-56581938	-	Lx7	LINE	L1	LINE
833.626	-0.564778	0.210472	-2.68338	0.00728816	0.0810384	Not sig	RLTR10-int_chr14-124000000-124000132	+	RLTR10-int	LTR	ERVK	ERVK
30.7654	-0.565777	0.397351	-1.42387	0.154483	0.450436	Not sig	RSINE1_chr4-152329778-152329880	+	RSINE1	SINE	B4	SINE
14.8368	-0.566524	0.531004	-1.06689	0.28602	0.605862	Not sig	L2b_chr16-92616202-92616305	-	L2b	LINE	L2	LINE
7.2974	-0.568892	0.759497	-0.749038	0.453834	0.747641	Not sig	ORR1D1_chr4-155553608-155553956	-	ORR1D1	LTR	ERVL-MaLR	ERVL
6.6887	-0.57073	0.841795	-0.677991	0.497777	0.782869	Not sig	RLTR13A1_chr4-147782647-147783501	-	RLTR13A1	LTR	ERVK	ERVK
17.5705	-0.571381	0.563617	-1.01378	0.31069	0.627018	Not sig	ORR1D1_chr6-140436734-140437050	+	ORR1D1	LTR	ERVL-MaLR	ERVL
12.4619	-0.572932	0.554728	-1.03282	0.30169	0.618663	Not sig	B3_chr9-123501246-123501448	+	B3	SINE	B2	SINE
27.9276	-0.574381	0.460066	-1.24848	0.211857	0.528043	Not sig	B2_Mm2_chr16-92062977-92063142	-	B2_Mm2	SINE	B2	SINE
12.4534	-0.578526	0.557822	-1.03712	0.299682	0.618311	Not sig	L1MB1_chr13-119784837-119784917	-	L1MB1	LINE	L1	LINE
9.0638	-0.578967	0.684131	-0.846281	0.397396	0.701326	Not sig	ORR1D2_chr6-145022479-145022646	+	ORR1D2	LTR	ERVL-MaLR	ERVL
14.9377	-0.581132	0.572941	-1.0143	0.310442	0.627018	Not sig	LTR33A__chr19-59311641-59311827	-	LTR33A_	LTR	ERVL	ERVL
7.49168	-0.586483	0.70948	-0.826637	0.408443	0.711459	Not sig	MTEb_chr9-117152761-117153083	-	MTEb	LTR	ERVL-MaLR	ERVL
6.55685	-0.586608	0.801853	-0.731565	0.464434	0.75419	Not sig	B3A_chr9-113689160-113689320	+	B3A	SINE	B2	SINE
20.1072	-0.58668	0.522829	-1.12213	0.261809	0.582219	Not sig	B1F2_chr4-150361851-150361922	-	B1F2	SINE	Alu	SINE
13.0661	-0.588404	0.570925	-1.03062	0.302721	0.618663	Not sig	L1M2_chr7-143230254-143230470	-	L1M2	LINE	L1	LINE
20.2697	-0.591558	0.463523	-1.27622	0.201877	0.520708	Not sig	MTA_Mm-int_chr15-102549303-102550344	+	MTA_Mm-int	LTR	ERVL-MaLR	ERVL
11.5989	-0.592258	0.586339	-1.0101	0.31245	0.627825	Not sig	PB1_chr19-56790407-56790511	-	PB1	SINE	Alu	SINE
8.9145	-0.593664	0.695137	-0.854025	0.393091	0.696623	Not sig	RMER17C_chr9-117160164-117160284	+	RMER17C	LTR	ERVK	ERVK
109.371	-0.596093	0.362865	-1.64274	0.100437	0.365319	Not sig	Lx2_chr4-145417615-145418882	-	Lx2	LINE	L1	LINE
94.3713	-0.604776	0.322568	-1.87488	0.0608092	0.277063	Not sig	L1VL4_chr7-143227268-143229787	-	L1VL4	LINE	L1	LINE
7.29802	-0.605594	0.786601	-0.769888	0.441366	0.737673	Not sig	L1MA4_chr19-55299898-55300315	-	L1MA4	LINE	L1	LINE
7.57514	-0.611678	0.699602	-0.874323	0.381942	0.690521	Not sig	ORR1D1_chr13-119450852-119451193	-	ORR1D1	LTR	ERVL-MaLR	ERVL
8.2246	-0.613238	1.12644	-0.544405	0.586163	0.839724	Not sig	B1F_chr15-102506549-102506616	+	B1F	SINE	Alu	SINE
8.23494	-0.614846	0.739587	-0.831337	0.405783	0.708552	Not sig	ID_B1_chr6-145239391-145239522	+	ID_B1	SINE	B4	SINE
28.4095	-0.615229	0.517727	-1.18833	0.234704	0.5579	Not sig	L2b_chr7-143294149-143294240	-	L2b	LINE	L2	LINE
9.13186	-0.620012	0.683756	-0.906773	0.364527	0.678469	Not sig	L2c_chrX-169265975-169266218	+	L2c	LINE	L2	LINE
7.90221	-0.621885	0.67828	-0.916857	0.359218	0.672671	Not sig	B3A_chrX-162776723-162776901	+	B3A	SINE	B2	SINE
43.6414	-0.62488	0.382206	-1.63493	0.102063	0.368419	Not sig	MIR_chr4-150859102-150859277	+	MIR	SINE	MIR	SINE
6.75689	-0.625565	0.761734	-0.821239	0.41151	0.714023	Not sig	RSINE1_chr4-155503002-155503106	+	RSINE1	SINE	B4	SINE
24.0454	-0.626883	0.892523	-0.702372	0.482447	0.770556	Not sig	B1F_chr15-102615195-102615348	-	B1F	SINE	Alu	SINE
10.0038	-0.630666	0.629348	-1.00209	0.316298	0.63142	Not sig	L1MB7_chr6-145241422-145241701	+	L1MB7	LINE	L1	LINE
13.4025	-0.630704	0.570158	-1.10619	0.268643	0.585287	Not sig	L1Md_F2_chr9-113699118-113699380	+	L1Md_F2	LINE	L1	LINE
40.316	-0.632398	0.391811	-1.61404	0.10652	0.372905	Not sig	RLTR15_chr4-148623538-148623880	-	RLTR15	LTR	ERVK	ERVK
8.33054	-0.633158	0.660369	-0.958795	0.337662	0.648648	Not sig	RSINE1_chr9-116942976-116943133	-	RSINE1	SINE	B4	SINE
41.3969	-0.63924	0.387101	-1.65135	0.0986668	0.364407	Not sig	B2_Mm1t_chr4-150861687-150861879	+	B2_Mm1t	SINE	B2	SINE
15.3456	-0.639647	0.560309	-1.1416	0.253621	0.575806	Not sig	L1_Mur2_chr7-143235605-143236044	-	L1_Mur2	LINE	L1	LINE
12.7335	-0.640688	0.569962	-1.12409	0.260975	0.581571	Not sig	L1_Mus3_chr9-117024330-117026093	-	L1_Mus3	LINE	L1	LINE
18.2065	-0.641052	0.504704	-1.27015	0.20403	0.523211	Not sig	PB1D7_chr16-92066141-92066270	-	PB1D7	SINE	Alu	SINE
8.07514	-0.642932	0.715615	-0.898434	0.368954	0.678506	Not sig	B1_Mm_chr1-194989431-194989570	-	B1_Mm	SINE	Alu	SINE
11.8022	-0.643351	0.609879	-1.05488	0.291479	0.612402	Not sig	Lx3_Mus_chr19-55344321-55345190	-	Lx3_Mus	LINE	L1	LINE
8.77873	-0.644133	0.700975	-0.91891	0.358143	0.671244	Not sig	MTA_Mm-int_chr4-155180716-155181811	-	MTA_Mm-int	LTR	ERVL-MaLR	ERVL
9.46787	-0.645799	0.723411	-0.892714	0.37201	0.680705	Not sig	B4A_chr16-92677272-92677547	+	B4A	SINE	B4	SINE
10.9504	-0.648562	0.594953	-1.09011	0.275667	0.592767	Not sig	B1_Mur4_chr9-114499800-114499885	-	B1_Mur4	SINE	Alu	SINE
9.14773	-0.650313	0.702941	-0.925131	0.354898	0.667494	Not sig	L1_Rod_chr9-119247561-119248113	+	L1_Rod	LINE	L1	LINE
23.9452	-0.650699	0.437672	-1.48673	0.137087	0.422925	Not sig	ID4_chr16-92687905-92688042	-	ID4	SINE	ID	SINE
19.0805	-0.650731	0.521821	-1.24704	0.212384	0.528742	Not sig	Lx9_chr9-120937193-120937464	-	Lx9	LINE	L1	LINE
29.9249	-0.651734	0.421631	-1.54574	0.122166	0.398907	Not sig	B4A_chr7-143290945-143291240	+	B4A	SINE	B4	SINE
8.44789	-0.651923	0.682669	-0.954962	0.339597	0.649532	Not sig	RMER6B_chr4-147846225-147846567	-	RMER6B	LTR	ERVK	ERVK
7.98365	-0.652319	0.740859	-0.88049	0.378594	0.687944	Not sig	RMER21A_chr13-119474037-119474541	-	RMER21A	LTR	ERV1	ERV1
13.1703	-0.653212	0.541601	-1.20608	0.227788	0.551109	Not sig	B4_chr9-116147929-116148205	-	B4	SINE	B4	SINE
9.24544	-0.654023	0.67293	-0.971903	0.331099	0.646281	Not sig	MTC_chr4-150356154-150356455	+	MTC	LTR	ERVL-MaLR	ERVL
7.78234	-0.656801	1.41142	-0.465348	0.641682	0.875429	Not sig	B3_chr16-91646042-91646231	+	B3	SINE	B2	SINE
9.51377	-0.657181	0.744198	-0.883073	0.377197	0.686568	Not sig	Lx9_chr16-91794076-91795009	-	Lx9	LINE	L1	LINE
8.8694	-0.660114	0.67296	-0.980911	0.326636	0.640668	Not sig	Lx8_chr11-121566608-121567547	+	Lx8	LINE	L1	LINE
11.5751	-0.662733	0.664188	-0.997809	0.318372	0.633349	Not sig	B3A_chr4-155501899-155502050	-	B3A	SINE	B2	SINE
6.65128	-0.663561	1.30089	-0.510082	0.609994	0.852987	Not sig	B3_chr5-151073045-151073228	-	B3	SINE	B2	SINE
8.25952	-0.665432	0.684903	-0.971571	0.331264	0.646281	Not sig	PB1D9_chr6-148942094-148942194	-	PB1D9	SINE	Alu	SINE
52.7668	-0.66686	0.372988	-1.78789	0.0737945	0.3087	Not sig	PB1D10_chr9-121735331-121735446	+	PB1D10	SINE	Alu	SINE
9.7378	-0.668226	0.656063	-1.01854	0.308421	0.624408	Not sig	L1MCa_chr7-143239747-143240550	-	L1MCa	LINE	L1	LINE
11.3157	-0.66913	0.600594	-1.11411	0.265231	0.584225	Not sig	L2_chr16-92116680-92116844	+	L2	LINE	L2	LINE
9.86345	-0.670339	0.611733	-1.0958	0.273165	0.591502	Not sig	B1_Mur2_chr6-146890289-146890433	-	B1_Mur2	SINE	Alu	SINE
10.2207	-0.671246	0.63453	-1.05786	0.290118	0.610984	Not sig	B1F_chr4-148564333-148564428	-	B1F	SINE	Alu	SINE
11.269	-0.673054	0.606831	-1.10913	0.267375	0.584225	Not sig	RLTR13B1_chr6-145071192-145071473	+	RLTR13B1	LTR	ERVK	ERVK
7.65119	-0.673799	0.684475	-0.984402	0.324918	0.639114	Not sig	MLT1A0_chr6-145780724-145780982	+	MLT1A0	LTR	ERVL-MaLR	ERVL
13.5472	-0.673983	0.562623	-1.19793	0.230944	0.552516	Not sig	L1MEf_chr7-142011448-142012250	-	L1MEf	LINE	L1	LINE
7.93198	-0.674026	0.691518	-0.974705	0.329706	0.645052	Not sig	B3A_chr16-87417358-87417552	+	B3A	SINE	B2	SINE
9.14468	-0.680387	0.662413	-1.02713	0.304358	0.620867	Not sig	PB1D9_chr4-155507539-155507668	-	PB1D9	SINE	Alu	SINE
6.8475	-0.681717	0.793934	-0.858657	0.39053	0.6955	Not sig	ORR1B1_chr19-55289498-55289876	-	ORR1B1	LTR	ERVL-MaLR	ERVL
11.5271	-0.681717	0.598321	-1.13938	0.254544	0.575806	Not sig	MLT2C1_chr6-146954624-146954788	+	MLT2C1	LTR	ERVL	ERVL
42.5333	-0.683634	0.383823	-1.78112	0.074893	0.310871	Not sig	ORR1A2-int_chr16-94640169-94641945	+	ORR1A2-int	LTR	ERVL-MaLR	ERVL
19.034	-0.685676	0.499511	-1.3727	0.169847	0.477314	Not sig	RLTR11C_MM_chr4-154504013-154504509	+	RLTR11C_MM	LTR	ERVK	ERVK
8.18242	-0.692754	0.67887	-1.02045	0.307514	0.624337	Not sig	B4A_chr6-146898031-146898286	+	B4A	SINE	B4	SINE
11.115	-0.69624	0.687654	-1.01248	0.311306	0.62729	Not sig	B3A_chr16-94678481-94678667	-	B3A	SINE	B2	SINE
11.771	-0.699872	0.573158	-1.22108	0.222055	0.54648	Not sig	MTE2a_chr9-123096651-123097022	+	MTE2a	LTR	ERVL-MaLR	ERVL
7.64748	-0.701437	1.14399	-0.613147	0.539779	0.812187	Not sig	RMER10A_chr19-55270768-55271191	-	RMER10A	LTR	ERVL	ERVL
11.6472	-0.701517	0.591909	-1.18518	0.235947	0.559107	Not sig	Lx5_chr16-87388332-87388660	+	Lx5	LINE	L1	LINE
18.3519	-0.701785	0.473417	-1.48238	0.138238	0.424731	Not sig	L2b_chr9-123098053-123098370	+	L2b	LINE	L2	LINE
12.4983	-0.704346	0.587359	-1.19917	0.23046	0.552402	Not sig	MT2A_chr9-116927185-116927508	+	MT2A	LTR	ERVL	ERVL
12.1985	-0.705813	0.609483	-1.15805	0.246843	0.567269	Not sig	RLTR17B_Mm_chr16-87731807-87731924	+	RLTR17B_Mm	LTR	ERVK	ERVK
17.4621	-0.70772	0.500316	-1.41454	0.157202	0.453435	Not sig	ERVB5_2-LTR_MM_chr16-96036601-96037039	+	ERVB5_2-LTR_MM	LTR	ERVK	ERVK
41.674	-0.708209	0.368027	-1.92434	0.0543121	0.264294	Not sig	MTD_chr4-155539778-155540106	-	MTD	LTR	ERVL-MaLR	ERVL
12.886	-0.718101	0.592991	-1.21098	0.225903	0.548556	Not sig	MTEa_chr9-116939604-116939949	-	MTEa	LTR	ERVL-MaLR	ERVL
10.3465	-0.71855	0.647488	-1.10975	0.267107	0.584225	Not sig	RMER12C_chr6-146977283-146977516	-	RMER12C	LTR	ERVK	ERVK
11.5993	-0.719453	0.621035	-1.15847	0.246671	0.567269	Not sig	B4A_chr7-144465611-144465821	-	B4A	SINE	B4	SINE
17.5682	-0.720424	0.536539	-1.34273	0.179361	0.48661	Not sig	Lx5_chr16-84709540-84709763	-	Lx5	LINE	L1	LINE
49.7619	-0.726396	0.353561	-2.05451	0.039926	0.224296	Not sig	L1_Mus4_chr19-55433238-55436448	+	L1_Mus4	LINE	L1	LINE
21.0784	-0.728374	0.503999	-1.44519	0.148405	0.444567	Not sig	L1Md_A_chr9-116981512-116988663	-	L1Md_A	LINE	L1	LINE
15.189	-0.730208	0.539745	-1.35287	0.176096	0.48325	Not sig	BGLII_B2_chr6-146902912-146903144	-	BGLII_B2	LTR	ERVK	ERVK
7.18458	-0.730239	0.762037	-0.958272	0.337926	0.648648	Not sig	RLTR15_chr4-152254187-152254535	-	RLTR15	LTR	ERVK	ERVK
12.526	-0.730645	0.549897	-1.32869	0.183949	0.495175	Not sig	Lx8_chrX-169074966-169075446	+	Lx8	LINE	L1	LINE
7.96695	-0.731837	0.725945	-1.00812	0.313399	0.628555	Not sig	MTE2b_chr6-148925607-148925807	+	MTE2b	LTR	ERVL-MaLR	ERVL
10.3558	-0.732268	0.611842	-1.19683	0.231375	0.552739	Not sig	L1_Mus2_chr4-155517632-155517756	-	L1_Mus2	LINE	L1	LINE
12.7932	-0.732899	0.573646	-1.27762	0.201385	0.520063	Not sig	PB1D10_chr16-92690417-92690525	-	PB1D10	SINE	Alu	SINE
24.0738	-0.733789	0.481195	-1.52493	0.127276	0.406745	Not sig	MTC_chr19-55274342-55274681	+	MTC	LTR	ERVL-MaLR	ERVL
22.1643	-0.73459	0.519147	-1.41499	0.15707	0.453435	Not sig	L1_Mm_chrY-90799952-90800209	-	L1_Mm	LINE	L1	LINE
32.4141	-0.737795	0.432777	-1.70479	0.088233	0.345526	Not sig	L1_Mus3_chr4-145431005-145431507	-	L1_Mus3	LINE	L1	LINE
9.09074	-0.741128	0.666381	-1.11217	0.266066	0.584225	Not sig	ID_B1_chr9-114441588-114441704	+	ID_B1	SINE	B4	SINE
25.311	-0.741609	0.46449	-1.59661	0.110353	0.379331	Not sig	Lx6_chrX-169091738-169092337	-	Lx6	LINE	L1	LINE
10.5143	-0.742706	0.588001	-1.2631	0.206552	0.523538	Not sig	ORR1E_chr6-146981944-146982248	-	ORR1E	LTR	ERVL-MaLR	ERVL
19.1916	-0.745515	0.488174	-1.52715	0.126724	0.406501	Not sig	B1_Mm_chr19-60780753-60780879	+	B1_Mm	SINE	Alu	SINE
6.90811	-0.746939	0.810373	-0.921723	0.356673	0.669074	Not sig	B3_chr6-140549316-140549522	+	B3	SINE	B2	SINE
7.55252	-0.747078	0.700606	-1.06633	0.286274	0.605862	Not sig	Lx8_chrX-166407613-166408293	+	Lx8	LINE	L1	LINE
8.61286	-0.74891	0.678156	-1.10433	0.269449	0.586447	Not sig	L1MA7_chr5-151041113-151041277	+	L1MA7	LINE	L1	LINE
11.615	-0.753874	0.627314	-1.20175	0.22946	0.5513	Not sig	MLT2B1_chr16-85032611-85032878	+	MLT2B1	LTR	ERVL	ERVL
10.0053	-0.754992	0.647303	-1.16637	0.243467	0.566067	Not sig	B3_chr7-143289822-143290031	+	B3	SINE	B2	SINE
7.07354	-0.756546	0.752646	-1.00518	0.31481	0.630206	Not sig	L1MC_chr16-96038975-96039241	-	L1MC	LINE	L1	LINE
11.5231	-0.761424	0.640822	-1.1882	0.234755	0.5579	Not sig	RMER17C_chr16-87392630-87392811	-	RMER17C	LTR	ERVK	ERVK
14.2671	-0.766905	0.598735	-1.28088	0.200237	0.518161	Not sig	RSINE1_chr9-113690663-113690795	+	RSINE1	SINE	B4	SINE
10.3081	-0.76842	0.609793	-1.26013	0.207622	0.523538	Not sig	B4A_chr4-145046790-145047064	-	B4A	SINE	B4	SINE
9.85318	-0.769041	0.651909	-1.17967	0.23813	0.560266	Not sig	B3_chr13-119789173-119789385	+	B3	SINE	B2	SINE
22.2809	-0.770453	0.454976	-1.69339	0.0903807	0.349472	Not sig	L1MC4_chr19-56566391-56566910	+	L1MC4	LINE	L1	LINE
11.1783	-0.771138	0.583554	-1.32145	0.186351	0.498376	Not sig	IAPEY3-int_chr4-145457338-145458990	+	IAPEY3-int	LTR	ERVK	ERVK
9.80669	-0.771871	0.664534	-1.16152	0.24543	0.567247	Not sig	B4_chr19-55263853-55264085	-	B4	SINE	B4	SINE
6.61849	-0.774965	0.802324	-0.9659	0.334094	0.647666	Not sig	RSINE1_chr9-121729369-121729536	+	RSINE1	SINE	B4	SINE
6.77096	-0.775652	0.749626	-1.03472	0.3008	0.618311	Not sig	B4_chr4-145235714-145235890	-	B4	SINE	B4	SINE
6.65737	-0.777413	0.779269	-0.997619	0.318464	0.633349	Not sig	MTB_Mm_chr7-143542927-143543332	-	MTB_Mm	LTR	ERVL-MaLR	ERVL
10.4801	-0.778131	0.659597	-1.17971	0.238117	0.560266	Not sig	RMER16B2_chr6-145061433-145061809	+	RMER16B2	LTR	ERVK	ERVK
7.66941	-0.779085	0.817184	-0.953377	0.340399	0.650008	Not sig	MTC-int_chr16-97820160-97820589	+	MTC-int	LTR	ERVL-MaLR	ERVL
8.54418	-0.780651	0.665099	-1.17374	0.240501	0.560995	Not sig	RLTR11A_chr5-151131607-151132123	+	RLTR11A	LTR	ERVK	ERVK
39.452	-0.782496	0.371985	-2.10357	0.035416	0.212717	Not sig	L1Md_F2_chr4-145440469-145446141	-	L1Md_F2	LINE	L1	LINE
7.88204	-0.784671	0.695643	-1.12798	0.259328	0.580311	Not sig	B1_Mus1_chr9-114549554-114549675	+	B1_Mus1	SINE	Alu	SINE
7.62088	-0.787367	0.70506	-1.11674	0.264106	0.584225	Not sig	B3_chr4-150527677-150527852	+	B3	SINE	B2	SINE
21.4294	-0.792189	0.464063	-1.70707	0.0878089	0.345526	Not sig	Lx8b_chr3-159881733-159882415	+	Lx8b	LINE	L1	LINE
7.37625	-0.793284	0.731443	-1.08455	0.278123	0.595031	Not sig	RMER17A2_chr9-117107076-117107929	+	RMER17A2	LTR	ERVK	ERVK
7.11392	-0.794233	0.770757	-1.03046	0.302795	0.618663	Not sig	B1_Mur3_chr6-140660995-140661069	-	B1_Mur3	SINE	Alu	SINE
19.8155	-0.799961	0.464343	-1.72278	0.0849283	0.341677	Not sig	B4A_chr9-114542133-114542396	-	B4A	SINE	B4	SINE
8.09667	-0.80087	0.676405	-1.18401	0.236409	0.559158	Not sig	L1MB5_chr16-91783634-91783723	-	L1MB5	LINE	L1	LINE
14.5205	-0.805824	0.54675	-1.47384	0.140524	0.425859	Not sig	RLTR11A2_chr9-123508305-123508785	-	RLTR11A2	LTR	ERVK	ERVK
13.4036	-0.805887	0.60572	-1.33046	0.183366	0.495175	Not sig	ERVB3_1-I_MM-int_chr6-145059598-145061329	+	ERVB3_1-I_MM-int	LTR	ERVK	ERVK
10.4183	-0.805996	1.01223	-0.796257	0.425883	0.727084	Not sig	ID_chr4-150297977-150298062	-	ID	SINE	ID	SINE
14.0914	-0.807439	0.560735	-1.43996	0.149877	0.444567	Not sig	PB1D7_chr6-140559712-140559831	+	PB1D7	SINE	Alu	SINE
10.7284	-0.808056	0.623581	-1.29583	0.195034	0.511041	Not sig	L1_Mus2_chr16-85033363-85033716	+	L1_Mus2	LINE	L1	LINE
14.7437	-0.808622	0.560047	-1.44385	0.148782	0.444567	Not sig	Lx6_chr16-98073275-98074646	+	Lx6	LINE	L1	LINE
10.9955	-0.81331	0.711519	-1.14306	0.253013	0.575806	Not sig	B2_Mm2_chr4-155572709-155572885	+	B2_Mm2	SINE	B2	SINE
7.3315	-0.822906	0.701037	-1.17384	0.240459	0.560995	Not sig	RodERV21-int_chr4-150605029-150605190	-	RodERV21-int	LTR	ERV1	ERV1
18.6002	-0.823609	0.573095	-1.43713	0.150682	0.444567	Not sig	L1MB5_chr4-155514735-155514954	-	L1MB5	LINE	L1	LINE
11.9692	-0.824981	0.621084	-1.32829	0.184082	0.495175	Not sig	L1_Mur2_chr6-146895740-146896078	+	L1_Mur2	LINE	L1	LINE
7.43227	-0.825043	0.787194	-1.04808	0.294602	0.615594	Not sig	B3_chr19-60772447-60772558	-	B3	SINE	B2	SINE
9.56589	-0.826662	0.644747	-1.28215	0.19979	0.518161	Not sig	MLT1D_chr19-57987210-57987392	+	MLT1D	LTR	ERVL-MaLR	ERVL
16.8411	-0.827126	0.51456	-1.60744	0.107957	0.376097	Not sig	L1MCa_chr16-92619333-92620090	+	L1MCa	LINE	L1	LINE
13.8509	-0.828047	0.559354	-1.48036	0.138777	0.424818	Not sig	B1_Mur3_chr16-96026415-96026568	+	B1_Mur3	SINE	Alu	SINE
7.22388	-0.829877	0.716876	-1.15763	0.247015	0.567269	Not sig	MLT1C_chr16-94639143-94639376	-	MLT1C	LTR	ERVL-MaLR	ERVL
12.0456	-0.831974	0.600141	-1.3863	0.165656	0.471484	Not sig	B3A_chr6-146588941-146589128	+	B3A	SINE	B2	SINE
11.4846	-0.836439	0.627745	-1.33245	0.182712	0.494451	Not sig	B3A_chr6-140656034-140656157	+	B3A	SINE	B2	SINE
7.8811	-0.838118	0.720001	-1.16405	0.244403	0.567016	Not sig	ORR1A2_chr4-155998182-155998500	+	ORR1A2	LTR	ERVL-MaLR	ERVL
7.22624	-0.83932	0.745383	-1.12602	0.260155	0.580432	Not sig	MLT1F1_chr16-84967492-84967816	+	MLT1F1	LTR	ERVL-MaLR	ERVL
17.5915	-0.841078	0.492817	-1.70667	0.0878827	0.345526	Not sig	L1MA5A_chr6-140478691-140479366	+	L1MA5A	LINE	L1	LINE
13.5576	-0.841434	0.560544	-1.5011	0.133329	0.41831	Not sig	RMER19C_chr9-117241611-117242226	+	RMER19C	LTR	ERVK	ERVK
14.1911	-0.841576	0.525388	-1.60182	0.109196	0.377349	Not sig	B4A_chr4-150238235-150238389	+	B4A	SINE	B4	SINE
17.4408	-0.843023	0.525233	-1.60505	0.108484	0.376722	Not sig	L2a_chr6-145218436-145218504	+	L2a	LINE	L2	LINE
6.57695	-0.843177	0.795072	-1.0605	0.288915	0.609648	Not sig	B4A_chr4-145073247-145073467	-	B4A	SINE	B4	SINE
9.19127	-0.843737	0.669904	-1.25949	0.207854	0.523538	Not sig	L1MC1_chr15-102582050-102582718	+	L1MC1	LINE	L1	LINE
9.94701	-0.844287	0.643932	-1.31114	0.189809	0.50474	Not sig	B3_chr4-155535087-155535239	+	B3	SINE	B2	SINE
17.4485	-0.845247	0.579617	-1.45829	0.144762	0.436318	Not sig	B1F_chr9-114551726-114551852	+	B1F	SINE	Alu	SINE
9.10706	-0.84819	0.62859	-1.34935	0.177223	0.484354	Not sig	RSINE1_chr4-155514982-155515131	-	RSINE1	SINE	B4	SINE
7.17857	-0.850685	0.748896	-1.13592	0.25599	0.576448	Not sig	B2_Mm2_chr16-96044245-96044431	+	B2_Mm2	SINE	B2	SINE
8.10669	-0.853387	0.740584	-1.15232	0.249191	0.57133	Not sig	L2a_chr13-117674334-117674566	+	L2a	LINE	L2	LINE
8.92859	-0.855323	0.695906	-1.22908	0.219042	0.542174	Not sig	L1MCa_chr7-143245629-143245794	-	L1MCa	LINE	L1	LINE
6.85158	-0.856678	0.768213	-1.11516	0.264784	0.584225	Not sig	PB1D7_chr15-102251427-102251546	-	PB1D7	SINE	Alu	SINE
85.9829	-0.862879	0.35036	-2.46284	0.0137843	0.122236	Not sig	L1_Mur2_chr7-143236884-143238555	-	L1_Mur2	LINE	L1	LINE
12.9927	-0.864715	0.567052	-1.52493	0.127277	0.406745	Not sig	ORR1A4_chr5-151169746-151170086	+	ORR1A4	LTR	ERVL-MaLR	ERVL
26.3949	-0.865639	0.482385	-1.7945	0.0727338	0.307863	Not sig	ID_B1_chr15-102081504-102081707	-	ID_B1	SINE	B4	SINE
20.4296	-0.866519	0.518312	-1.67181	0.0945616	0.358532	Not sig	B1_Mus1_chr19-60763310-60763437	+	B1_Mus1	SINE	Alu	SINE
7.51646	-0.866966	0.714437	-1.2135	0.22494	0.548556	Not sig	ORR1B1_chr9-113946433-113946747	-	ORR1B1	LTR	ERVL-MaLR	ERVL
8.19579	-0.868176	0.69482	-1.2495	0.211483	0.527723	Not sig	B3_chr4-150336403-150336608	+	B3	SINE	B2	SINE
7.78817	-0.873352	0.753812	-1.15858	0.246627	0.567269	Not sig	Lx5_chr19-61088930-61089098	-	Lx5	LINE	L1	LINE
9.27633	-0.875959	0.688855	-1.27162	0.20351	0.523032	Not sig	PB1D9_chr6-145796044-145796172	-	PB1D9	SINE	Alu	SINE
13.6227	-0.876881	0.576824	-1.52019	0.128464	0.409027	Not sig	B1_Mus2_chr15-102076882-102077027	+	B1_Mus2	SINE	Alu	SINE
8.6667	-0.878363	0.715532	-1.22757	0.21961	0.542328	Not sig	MTEb-int_chr19-59324075-59324232	+	MTEb-int	LTR	ERVL-MaLR	ERVL
11.2471	-0.881025	0.644855	-1.36624	0.171864	0.478367	Not sig	B4_chr16-84975597-84975845	-	B4	SINE	B4	SINE
11.431	-0.882314	1.15312	-0.765154	0.44418	0.740069	Not sig	PB1D9_chr19-59291459-59291577	-	PB1D9	SINE	Alu	SINE
34.3564	-0.883586	0.417517	-2.11629	0.0343204	0.210668	Not sig	L1ME3_chr7-143267426-143267844	-	L1ME3	LINE	L1	LINE
6.61978	-0.883703	0.837905	-1.05466	0.291582	0.612402	Not sig	ID_B1_chr4-150869048-150869252	+	ID_B1	SINE	B4	SINE
19.4005	-0.890944	0.954058	-0.933847	0.350383	0.662655	Not sig	PB1D11_chr4-150348030-150348125	-	PB1D11	SINE	Alu	SINE
10.0252	-0.893543	0.685447	-1.30359	0.192373	0.507765	Not sig	PB1D9_chr4-156120727-156120839	-	PB1D9	SINE	Alu	SINE
33.9043	-0.895803	0.411349	-2.17772	0.0294269	0.192292	Not sig	RSINE1_chr19-60782431-60782554	+	RSINE1	SINE	B4	SINE
8.45538	-0.900317	0.675041	-1.33372	0.182295	0.493945	Not sig	ORR1D2_chr4-156007521-156007795	-	ORR1D2	LTR	ERVL-MaLR	ERVL
8.93385	-0.903296	0.716103	-1.2614	0.207163	0.523538	Not sig	L1_Mur1_chr6-143044102-143045240	-	L1_Mur1	LINE	L1	LINE
7.80113	-0.907488	0.70213	-1.29248	0.196192	0.513204	Not sig	Lx8_chr11-121565350-121565921	+	Lx8	LINE	L1	LINE
6.64357	-0.909833	0.798442	-1.13951	0.25449	0.575806	Not sig	B3_chr5-151181794-151181991	+	B3	SINE	B2	SINE
19.5957	-0.910275	0.55208	-1.64881	0.0991863	0.364407	Not sig	Lx2_chr4-145448694-145449145	-	Lx2	LINE	L1	LINE
12.9805	-0.91172	0.594544	-1.53348	0.125158	0.403055	Not sig	B3A_chr6-145794864-145795011	-	B3A	SINE	B2	SINE
12.4223	-0.912082	0.637987	-1.42962	0.152825	0.448869	Not sig	B1_Mur2_chr9-114545089-114545218	-	B1_Mur2	SINE	Alu	SINE
23.4432	-0.912087	0.45381	-2.00984	0.0444478	0.235518	Not sig	L1ME4a_chr7-143254130-143254236	-	L1ME4a	LINE	L1	LINE
12.1883	-0.916108	0.560472	-1.63453	0.102148	0.368419	Not sig	B3_chr16-92112914-92113093	+	B3	SINE	B2	SINE
12.2017	-0.917015	0.565963	-1.62027	0.105173	0.371	Not sig	Lx8_chr6-146925059-146925794	-	Lx8	LINE	L1	LINE
7.28014	-0.918106	0.790815	-1.16096	0.245657	0.567247	Not sig	RSINE1_chr4-145027269-145027419	-	RSINE1	SINE	B4	SINE
7.959	-0.919647	0.694986	-1.32326	0.185749	0.498376	Not sig	ORR1B1-int_chr19-61115274-61116061	-	ORR1B1-int	LTR	ERVL-MaLR	ERVL
17.3644	-0.920619	0.504185	-1.82595	0.0678571	0.294808	Not sig	B1F1_chr16-91030923-91031037	-	B1F1	SINE	Alu	SINE
10.6787	-0.920977	0.615931	-1.49526	0.134847	0.419535	Not sig	L1_Mm_chrY-90808179-90808635	-	L1_Mm	LINE	L1	LINE
33.7097	-0.921968	0.405176	-2.27548	0.0228774	0.168133	Not sig	B3_chr19-60786272-60786469	+	B3	SINE	B2	SINE
6.88385	-0.92702	0.726927	-1.27526	0.202218	0.520959	Not sig	PB1D7_chr16-85060249-85060348	-	PB1D7	SINE	Alu	SINE
17.9866	-0.928702	0.478119	-1.94241	0.0520876	0.25875	Not sig	B4_chr9-116903997-116904322	-	B4	SINE	B4	SINE
13.7271	-0.933577	0.63368	-1.47326	0.14068	0.425859	Not sig	ID_B1_chr9-114408144-114408248	+	ID_B1	SINE	B4	SINE
6.68004	-0.93906	0.846223	-1.10971	0.267125	0.584225	Not sig	B1_Mus1_chr9-120132523-120132650	-	B1_Mus1	SINE	Alu	SINE
7.06058	-0.947703	0.784309	-1.20833	0.22692	0.55025	Not sig	ORR1A2_chr4-150503038-150503364	-	ORR1A2	LTR	ERVL-MaLR	ERVL
9.19099	-0.949053	0.692204	-1.37106	0.170356	0.477314	Not sig	L2a_chrX-161994883-161995498	-	L2a	LINE	L2	LINE
15.4059	-0.949181	0.520099	-1.825	0.0680009	0.294808	Not sig	ID4_chr9-121734814-121734893	+	ID4	SINE	ID	SINE
10.4505	-0.953764	0.633888	-1.50463	0.13242	0.416677	Not sig	B3_chr9-114551412-114551557	+	B3	SINE	B2	SINE
7.44427	-0.964189	0.714358	-1.34973	0.177103	0.484354	Not sig	PB1D10_chr16-94582417-94582477	-	PB1D10	SINE	Alu	SINE
14.3587	-0.966127	0.584306	-1.65346	0.0982369	0.364407	Not sig	L2c_chr15-102074746-102074803	-	L2c	LINE	L2	LINE
6.86088	-0.972714	0.764926	-1.27164	0.203499	0.523032	Not sig	L1ME1_chr19-55520009-55520542	-	L1ME1	LINE	L1	LINE
6.64566	-0.975452	0.801531	-1.21699	0.223609	0.548306	Not sig	RSINE1_chr16-90904833-90904968	+	RSINE1	SINE	B4	SINE
7.12683	-0.983297	0.834795	-1.17789	0.23884	0.560266	Not sig	PB1D7_chr9-115279486-115279585	+	PB1D7	SINE	Alu	SINE
23.917	-1.00252	0.494267	-2.0283	0.0425293	0.230475	Not sig	B1_Mur1_chr5-151153028-151153179	+	B1_Mur1	SINE	Alu	SINE
74.6182	-1.01159	0.329394	-3.07107	0.00213291	0.0352094	Down	Lx7_chr5-151083650-151085608	+	Lx7	LINE	L1	LINE
12.2477	-1.01657	0.660662	-1.53872	0.123873	0.401304	Not sig	L1M4_chr7-143249204-143249682	-	L1M4	LINE	L1	LINE
9.63139	-1.02196	0.634104	-1.61166	0.107036	0.374102	Not sig	L1ME3Cz_chr16-94395909-94396630	+	L1ME3Cz	LINE	L1	LINE
14.2215	-1.02372	0.61389	-1.6676	0.0953946	0.360417	Not sig	B1_Mus1_chr9-120132152-120132283	+	B1_Mus1	SINE	Alu	SINE
7.19416	-1.02549	0.733007	-1.39902	0.161808	0.464225	Not sig	MIRc_chr16-92654592-92654729	-	MIRc	SINE	MIR	SINE
13.7804	-1.02593	0.534024	-1.92114	0.0547144	0.26505	Not sig	B3_chr6-145226870-145227020	-	B3	SINE	B2	SINE
8.85645	-1.02825	0.695332	-1.47879	0.139198	0.424818	Not sig	PB1D7_chr6-146968850-146968948	+	PB1D7	SINE	Alu	SINE
9.59906	-1.03128	0.752595	-1.3703	0.170594	0.477314	Not sig	B3_chr6-146893231-146893405	-	B3	SINE	B2	SINE
27.1381	-1.03181	0.451913	-2.2832	0.0224187	0.165898	Not sig	RLTR40_chrY-90811148-90811351	+	RLTR40	LTR	ERVK	ERVK
8.86789	-1.03744	0.730171	-1.42081	0.155371	0.451187	Not sig	L1M4_chr6-145790422-145790701	+	L1M4	LINE	L1	LINE
7.81794	-1.03823	0.726941	-1.42822	0.153228	0.448869	Not sig	B1_Mur1_chr5-151086031-151086162	+	B1_Mur1	SINE	Alu	SINE
25.2426	-1.0388	0.440048	-2.36066	0.0182424	0.144814	Not sig	B2_Mm2_chr19-59306253-59306429	+	B2_Mm2	SINE	B2	SINE
11.7783	-1.0393	0.606224	-1.71438	0.0864595	0.344234	Not sig	ID_B1_chr4-155544191-155544383	+	ID_B1	SINE	B4	SINE
15.8159	-1.03991	0.537628	-1.93425	0.0530819	0.261166	Not sig	B1F_chr9-114560414-114560544	+	B1F	SINE	Alu	SINE
8.71388	-1.0418	0.707168	-1.4732	0.140696	0.425859	Not sig	MLT1A1_chr4-143176191-143176310	+	MLT1A1	LTR	ERVL-MaLR	ERVL
13.7674	-1.04707	0.56561	-1.85123	0.0641369	0.285556	Not sig	RSINE1_chr4-150458288-150458448	+	RSINE1	SINE	B4	SINE
12.7258	-1.05258	0.568078	-1.85287	0.0639003	0.285475	Not sig	MIRb_chr5-151169572-151169735	+	MIRb	SINE	MIR	SINE
10.6911	-1.05344	0.606916	-1.73573	0.0826124	0.335135	Not sig	MTA_Mm-int_chr16-85003870-85005026	+	MTA_Mm-int	LTR	ERVL-MaLR	ERVL
6.80719	-1.05385	0.821442	-1.28293	0.199518	0.518161	Not sig	RSINE1_chr4-150872916-150873014	+	RSINE1	SINE	B4	SINE
16.9291	-1.05465	0.533641	-1.97633	0.0481175	0.245503	Not sig	L1M4c_chr19-56554154-56554484	+	L1M4c	LINE	L1	LINE
12.9461	-1.05559	0.62685	-1.68396	0.0921901	0.353918	Not sig	MusHAL1_chr19-55300321-55300666	-	MusHAL1	LINE	L1	LINE
16.7716	-1.05792	0.528614	-2.00131	0.0453585	0.237691	Not sig	L1MB3_chr6-146982351-146982560	-	L1MB3	LINE	L1	LINE
34.7184	-1.06612	0.885549	-1.20391	0.228625	0.5513	Not sig	L1M4_chr7-143247748-143248559	-	L1M4	LINE	L1	LINE
8.01077	-1.06797	0.692094	-1.54309	0.122808	0.398907	Not sig	ID4__chr7-144467991-144468056	+	ID4_	SINE	ID	SINE
6.76834	-1.07258	0.814648	-1.31662	0.187965	0.501432	Not sig	B3_chr4-150349453-150349540	+	B3	SINE	B2	SINE
7.82559	-1.07778	0.759	-1.42	0.155608	0.451264	Not sig	RMER19B_chr19-58079886-58080796	+	RMER19B	LTR	ERVK	ERVK
6.98329	-1.0855	0.821249	-1.32177	0.186246	0.498376	Not sig	B1_Mus1_chr4-144995452-144995600	-	B1_Mus1	SINE	Alu	SINE
12.4229	-1.08905	0.670311	-1.62469	0.104229	0.370526	Not sig	B1_Mur4_chr16-94584340-94584404	+	B1_Mur4	SINE	Alu	SINE
10.3823	-1.09036	0.694091	-1.57092	0.1162	0.387214	Not sig	LTR31_chr13-116987212-116987496	+	LTR31	LTR	ERV1	ERV1
6.91772	-1.0913	0.74331	-1.46816	0.142061	0.428779	Not sig	B1F2_chr19-56587454-56587559	-	B1F2	SINE	Alu	SINE
8.74	-1.09165	0.673919	-1.61986	0.105263	0.371	Not sig	PB1D10_chr19-55431214-55431316	-	PB1D10	SINE	Alu	SINE
19.7868	-1.09229	0.505683	-2.16002	0.0307709	0.197401	Not sig	MTD_chr16-96006054-96006366	+	MTD	LTR	ERVL-MaLR	ERVL
6.68296	-1.10297	0.814542	-1.3541	0.175703	0.48279	Not sig	B4_chr9-117196080-117196340	-	B4	SINE	B4	SINE
9.46019	-1.10491	0.700666	-1.57695	0.114808	0.38592	Not sig	B1_Mus1_chr4-150295201-150295316	+	B1_Mus1	SINE	Alu	SINE
8.35572	-1.11584	0.756987	-1.47405	0.140468	0.425859	Not sig	B3_chr4-149232334-149232538	-	B3	SINE	B2	SINE
10.4003	-1.12046	0.609734	-1.83763	0.0661175	0.291206	Not sig	L1MB8_chrX-169982615-169982757	-	L1MB8	LINE	L1	LINE
8.12969	-1.12608	0.715631	-1.57355	0.115591	0.38592	Not sig	MT2B2_chr16-91755732-91756310	+	MT2B2	LTR	ERVL	ERVL
23.8295	-1.12814	0.476026	-2.36991	0.0177926	0.143161	Not sig	L1_Mm_chrY-90804712-90805946	-	L1_Mm	LINE	L1	LINE
9.51727	-1.13299	0.686928	-1.64936	0.0990748	0.364407	Not sig	L1MD_chr7-142029995-142030224	+	L1MD	LINE	L1	LINE
8.30288	-1.13706	0.709551	-1.60251	0.109043	0.377349	Not sig	B1_Mm_chr9-114556828-114556928	-	B1_Mm	SINE	Alu	SINE
11.9208	-1.13829	0.609458	-1.86771	0.0618026	0.278631	Not sig	Lx10_chr16-84990463-84990581	+	Lx10	LINE	L1	LINE
6.66943	-1.14382	0.801686	-1.42677	0.153648	0.448869	Not sig	B1F1_chr9-113698859-113699000	+	B1F1	SINE	Alu	SINE
16.3039	-1.14597	0.588047	-1.94877	0.0513224	0.256149	Not sig	L1MB7_chr4-155168621-155168959	+	L1MB7	LINE	L1	LINE
24.5447	-1.14755	0.446424	-2.57055	0.0101538	0.0985977	Not sig	B3A_chr16-87492992-87493128	-	B3A	SINE	B2	SINE
13.2685	-1.14887	0.580622	-1.9787	0.0478502	0.245503	Not sig	L1MB8_chr19-55544052-55544881	-	L1MB8	LINE	L1	LINE
9.46054	-1.15351	0.677506	-1.70258	0.0886476	0.346517	Not sig	RMER17C2_chr4-154581818-154581984	+	RMER17C2	LTR	ERVK	ERVK
7.52309	-1.15386	0.743331	-1.55229	0.120594	0.396315	Not sig	ID4_chr4-155500795-155500867	-	ID4	SINE	ID	SINE
7.99344	-1.15818	0.705767	-1.64102	0.100793	0.365992	Not sig	MLT1B_chr5-151179967-151180274	+	MLT1B	LTR	ERVL-MaLR	ERVL
20.5601	-1.16099	0.460621	-2.52049	0.0117191	0.107937	Not sig	MTC_chr5-151178174-151178576	+	MTC	LTR	ERVL-MaLR	ERVL
8.68066	-1.16137	0.730413	-1.59001	0.111832	0.381348	Not sig	L2a_chr7-143280910-143281052	+	L2a	LINE	L2	LINE
34.9238	-1.16215	0.390089	-2.97919	0.00289016	0.0452721	Down	L1_Mm_chrY-90806983-90807239	-	L1_Mm	LINE	L1	LINE
11.9155	-1.16461	0.61553	-1.89205	0.0584847	0.271663	Not sig	B2_Mm2_chr6-140632703-140632873	+	B2_Mm2	SINE	B2	SINE
7.99648	-1.16589	0.730493	-1.59603	0.110483	0.379331	Not sig	MLT1K_chr7-143253021-143253137	-	MLT1K	LTR	ERVL-MaLR	ERVL
8.95252	-1.1669	0.67891	-1.71878	0.0856544	0.342937	Not sig	L4_B_Mam_chr16-94394440-94394701	-	L4_B_Mam	LINE	RTE-X	LINE
9.52976	-1.16797	0.703888	-1.65931	0.0970535	0.363881	Not sig	ORR1D2_chr9-116915216-116915565	-	ORR1D2	LTR	ERVL-MaLR	ERVL
9.04858	-1.1696	0.657761	-1.77815	0.0753796	0.311685	Not sig	Lx5_chr5-151036083-151036843	+	Lx5	LINE	L1	LINE
8.76329	-1.17092	0.751528	-1.55805	0.119222	0.393531	Not sig	ID4__chr13-119767255-119767344	+	ID4_	SINE	ID	SINE
9.27769	-1.17379	0.66728	-1.75907	0.0785651	0.321144	Not sig	ORR1D2_chr4-150380243-150380390	-	ORR1D2	LTR	ERVL-MaLR	ERVL
16.4864	-1.1755	0.513009	-2.29137	0.0219418	0.16464	Not sig	L1M5_chr7-143291795-143292125	-	L1M5	LINE	L1	LINE
9.11226	-1.17685	0.653106	-1.80193	0.0715566	0.303479	Not sig	RMER6A_chr16-98075363-98076064	-	RMER6A	LTR	ERVK	ERVK
17.6931	-1.17895	0.541545	-2.17701	0.02948	0.192292	Not sig	L1MC1_chr5-151079775-151080607	+	L1MC1	LINE	L1	LINE
21.9117	-1.18042	0.488715	-2.41536	0.0157196	0.132812	Not sig	MIRb_chr5-151175435-151175571	+	MIRb	SINE	MIR	SINE
12.5057	-1.18129	0.611998	-1.93021	0.0535804	0.261921	Not sig	ID_B1_chr4-155197339-155197540	+	ID_B1	SINE	B4	SINE
11.8085	-1.19319	0.592584	-2.01354	0.0440573	0.234677	Not sig	L1MD_chr16-92109381-92109783	-	L1MD	LINE	L1	LINE
6.56627	-1.19451	0.749292	-1.59419	0.110893	0.379331	Not sig	ORR1B2_chr9-113827522-113827880	-	ORR1B2	LTR	ERVL-MaLR	ERVL
12.0712	-1.20675	0.585388	-2.06145	0.0392603	0.223401	Not sig	ORR1B1_chr16-97960077-97960454	+	ORR1B1	LTR	ERVL-MaLR	ERVL
8.72069	-1.20911	0.742516	-1.62839	0.103442	0.369869	Not sig	L1_Mus1_chr4-149232936-149233579	+	L1_Mus1	LINE	L1	LINE
12.342	-1.21134	0.652138	-1.8575	0.0632403	0.28392	Not sig	L1ME1_chr4-155193838-155194084	+	L1ME1	LINE	L1	LINE
6.76676	-1.21223	0.79592	-1.52305	0.127746	0.407346	Not sig	L2a_chr4-148441764-148442724	+	L2a	LINE	L2	LINE
15.0827	-1.2204	0.544283	-2.24222	0.0249474	0.177275	Not sig	RLTR13A2_chr6-140459268-140460225	+	RLTR13A2	LTR	ERVK	ERVK
30.6042	-1.22374	0.44202	-2.76851	0.00563125	0.0690552	Not sig	L1_Mm_chrY-90798714-90798824	-	L1_Mm	LINE	L1	LINE
10.8377	-1.22818	0.596009	-2.06068	0.0393336	0.223401	Not sig	B3A_chr9-113966817-113967033	-	B3A	SINE	B2	SINE
7.23547	-1.22835	0.768187	-1.59903	0.109814	0.378878	Not sig	B1_Mur1_chr4-150463207-150463338	+	B1_Mur1	SINE	Alu	SINE
13.8493	-1.22931	0.614385	-2.00089	0.0454047	0.237691	Not sig	ID_B1_chr16-92669306-92669529	+	ID_B1	SINE	B4	SINE
16.45	-1.2432	0.530454	-2.34365	0.0190962	0.14848	Not sig	B1_Mus1_chr9-114539673-114539820	+	B1_Mus1	SINE	Alu	SINE
20.5759	-1.24489	0.475033	-2.62064	0.00877661	0.0932406	Not sig	RLTR16_chr5-151067679-151068075	+	RLTR16	LTR	ERVK	ERVK
12.6247	-1.24861	0.637431	-1.95882	0.0501338	0.252552	Not sig	L1MA5_chr9-116108665-116108991	+	L1MA5	LINE	L1	LINE
8.15261	-1.25079	0.791621	-1.58004	0.114098	0.384992	Not sig	RMER6A_chr4-145433186-145433373	-	RMER6A	LTR	ERVK	ERVK
6.81149	-1.25192	0.837355	-1.49508	0.134893	0.419535	Not sig	L1M3c_chr7-143232803-143233313	-	L1M3c	LINE	L1	LINE
11.3108	-1.25283	0.608643	-2.05841	0.0395511	0.223949	Not sig	B2_Mm2_chr9-114543636-114543824	+	B2_Mm2	SINE	B2	SINE
12.6227	-1.25527	0.579651	-2.16556	0.0303451	0.195557	Not sig	Lx8_chr6-147051030-147051195	-	Lx8	LINE	L1	LINE
9.09402	-1.2602	0.68772	-1.83243	0.0668876	0.293255	Not sig	ORR1B2_chr16-85042666-85043014	+	ORR1B2	LTR	ERVL-MaLR	ERVL
8.21678	-1.26224	0.775849	-1.62691	0.103756	0.369869	Not sig	B1F_chr4-150248304-150248428	-	B1F	SINE	Alu	SINE
7.13597	-1.26372	0.82304	-1.53543	0.124679	0.402767	Not sig	PB1D10_chr6-146913405-146913511	+	PB1D10	SINE	Alu	SINE
7.17284	-1.26416	0.8576	-1.47407	0.140464	0.425859	Not sig	L2_chr9-113800178-113800696	-	L2	LINE	L2	LINE
8.26918	-1.26484	0.769025	-1.64474	0.100024	0.364435	Not sig	MurERV4-int_chr9-113829578-113830495	-	MurERV4-int	LTR	ERVK	ERVK
9.96465	-1.28049	0.625422	-2.0474	0.0406191	0.227001	Not sig	L1M4_chr6-145790221-145790412	+	L1M4	LINE	L1	LINE
12.0941	-1.29134	0.567186	-2.27675	0.022801	0.168133	Not sig	B1_Mur4_chr16-95994247-95994380	+	B1_Mur4	SINE	Alu	SINE
7.32872	-1.29497	0.808277	-1.60213	0.109127	0.377349	Not sig	B1_Mur2_chr4-150462652-150462787	+	B1_Mur2	SINE	Alu	SINE
6.698	-1.29827	0.789008	-1.64545	0.0998774	0.364435	Not sig	B3_chr4-150286744-150286946	+	B3	SINE	B2	SINE
7.57454	-1.299	0.786517	-1.65158	0.0986203	0.364407	Not sig	L1MEg_chr19-57659023-57659156	+	L1MEg	LINE	L1	LINE
11.0016	-1.30452	0.610678	-2.13618	0.0326648	0.205557	Not sig	Lx8_chr4-145412573-145412842	-	Lx8	LINE	L1	LINE
15.8408	-1.31536	0.595068	-2.21044	0.0270745	0.185038	Not sig	Lx6_chr9-113667916-113668432	+	Lx6	LINE	L1	LINE
13.0039	-1.32451	0.600328	-2.20632	0.0273619	0.185818	Not sig	MIRb_chr5-151153301-151153385	+	MIRb	SINE	MIR	SINE
8.83309	-1.32743	0.668666	-1.9852	0.0471226	0.243213	Not sig	MLTR14_chr5-151139018-151139456	-	MLTR14	LTR	ERV1	ERV1
17.738	-1.32824	0.548315	-2.42241	0.015418	0.131298	Not sig	RLTR11A_chr5-151170756-151171137	+	RLTR11A	LTR	ERVK	ERVK
7.44511	-1.33762	0.799216	-1.67367	0.0941954	0.357776	Not sig	B3A_chr19-55440535-55440744	+	B3A	SINE	B2	SINE
7.80221	-1.34642	0.746058	-1.80471	0.0711193	0.302383	Not sig	L1_Mus3_chr4-145434572-145434957	-	L1_Mus3	LINE	L1	LINE
7.56099	-1.34686	0.770128	-1.74888	0.0803119	0.326419	Not sig	ID_B1_chrX-162767537-162767680	-	ID_B1	SINE	B4	SINE
12.3516	-1.35063	0.622938	-2.16817	0.030146	0.194903	Not sig	B3_chr4-150289050-150289220	-	B3	SINE	B2	SINE
7.7113	-1.35881	1.26093	-1.07763	0.2812	0.599491	Not sig	B3_chr9-114552358-114552554	+	B3	SINE	B2	SINE
8.08734	-1.37102	0.698945	-1.96156	0.0498136	0.25153	Not sig	ID_B1_chr6-140640184-140640265	-	ID_B1	SINE	B4	SINE
15.6251	-1.38538	0.539915	-2.56592	0.0102903	0.0990272	Not sig	L1MA5_chr6-140443878-140444266	-	L1MA5	LINE	L1	LINE
7.50728	-1.39042	0.770289	-1.80507	0.0710643	0.302383	Not sig	ORR1A2_chr9-114517462-114517740	+	ORR1A2	LTR	ERVL-MaLR	ERVL
6.56316	-1.39407	1.39936	-0.99622	0.319143	0.633562	Not sig	MLT1I_chr5-151138834-151138912	-	MLT1I	LTR	ERVL-MaLR	ERVL
7.00703	-1.39894	0.798934	-1.751	0.0799451	0.325849	Not sig	ID_B1_chr9-113942399-113942539	+	ID_B1	SINE	B4	SINE
6.80628	-1.40057	0.768334	-1.82287	0.0683231	0.295607	Not sig	B1_Mus1_chr11-121293109-121293241	-	B1_Mus1	SINE	Alu	SINE
6.76071	-1.40521	0.857215	-1.63928	0.101156	0.366689	Not sig	Lx3_Mus_chr19-56568810-56569584	+	Lx3_Mus	LINE	L1	LINE
9.94715	-1.41211	0.685175	-2.06095	0.0393077	0.223401	Not sig	MIR_chr9-118540373-118540528	-	MIR	SINE	MIR	SINE
21.0471	-1.4253	0.504723	-2.82393	0.00474382	0.0625105	Not sig	B2_Mm2_chr7-143241306-143241489	-	B2_Mm2	SINE	B2	SINE
7.55966	-1.42655	0.735179	-1.94041	0.0523303	0.259087	Not sig	RSINE1_chr16-90835607-90835747	+	RSINE1	SINE	B4	SINE
7.13971	-1.42974	0.763936	-1.87155	0.0612694	0.277944	Not sig	B3_chr5-151075390-151075573	-	B3	SINE	B2	SINE
7.01113	-1.43674	0.768069	-1.87059	0.061402	0.277944	Not sig	B1_Mus1_chr9-113855063-113855203	+	B1_Mus1	SINE	Alu	SINE
8.68874	-1.4375	0.704364	-2.04086	0.0412652	0.227875	Not sig	MIR_chr5-151131017-151131137	+	MIR	SINE	MIR	SINE
7.85751	-1.44032	0.717518	-2.00736	0.0447112	0.236331	Not sig	Lx8_chr13-117675649-117676097	+	Lx8	LINE	L1	LINE
9.19858	-1.45531	0.762355	-1.90897	0.0562662	0.268327	Not sig	B3_chr4-148624245-148624423	+	B3	SINE	B2	SINE
8.48962	-1.4598	0.718142	-2.03275	0.0420778	0.229768	Not sig	B3A_chr9-117054060-117054240	-	B3A	SINE	B2	SINE
10.1334	-1.46136	0.650296	-2.24722	0.0246257	0.17557	Not sig	B4A_chr16-84961143-84961404	-	B4A	SINE	B4	SINE
14.7011	-1.46642	0.556412	-2.6355	0.00840143	0.0906003	Not sig	ORR1B1_chr6-145068854-145069222	+	ORR1B1	LTR	ERVL-MaLR	ERVL
6.76681	-1.47142	0.798742	-1.84218	0.0654495	0.289924	Not sig	Lx7_chr4-150313383-150314101	-	Lx7	LINE	L1	LINE
12.1285	-1.48223	0.655784	-2.26024	0.0238064	0.173595	Not sig	Lx7_chr3-159511161-159512239	-	Lx7	LINE	L1	LINE
8.36731	-1.48466	0.711246	-2.0874	0.0368516	0.217263	Not sig	B1F1_chr9-114716860-114716996	+	B1F1	SINE	Alu	SINE
8.07447	-1.49824	1.45998	-1.02621	0.304795	0.621168	Not sig	MTC-int_chr16-96006413-96006810	+	MTC-int	LTR	ERVL-MaLR	ERVL
7.22023	-1.49904	0.753273	-1.99004	0.0465869	0.241487	Not sig	L2a_chrX-162146474-162146764	+	L2a	LINE	L2	LINE
22.1132	-1.51424	0.49509	-3.05851	0.00222438	0.036163	Down	L1M5_chr7-143256155-143256615	-	L1M5	LINE	L1	LINE
10.0752	-1.52076	0.651386	-2.33465	0.0195615	0.149925	Not sig	MTD_chr7-141480053-141480141	-	MTD	LTR	ERVL-MaLR	ERVL
6.77896	-1.52878	0.781837	-1.95536	0.0505402	0.25341	Not sig	L1M2_chr19-55273965-55274169	+	L1M2	LINE	L1	LINE
8.3415	-1.53695	0.747449	-2.05626	0.0397578	0.224296	Not sig	Lx8_chrX-169087903-169088116	-	Lx8	LINE	L1	LINE
13.4029	-1.54027	0.629628	-2.44631	0.0144327	0.124935	Not sig	L1M4_chr7-143244665-143244716	-	L1M4	LINE	L1	LINE
13.8241	-1.54818	0.579116	-2.67336	0.00750967	0.0822232	Not sig	ID4_chr7-141895750-141895810	+	ID4	SINE	ID	SINE
8.04964	-1.55388	0.761696	-2.04002	0.0413479	0.227875	Not sig	ID4__chr9-113670357-113670430	+	ID4_	SINE	ID	SINE
8.68046	-1.55813	0.701634	-2.22072	0.02637	0.183139	Not sig	B4_chr9-116153252-116153522	+	B4	SINE	B4	SINE
9.64559	-1.56955	1.15614	-1.35759	0.174595	0.481374	Not sig	MTE2b_chr4-150244405-150244578	-	MTE2b	LTR	ERVL-MaLR	ERVL
21.8377	-1.59703	0.476149	-3.35405	0.000796392	0.0171631	Down	RLTR48A_chr16-94620578-94621284	-	RLTR48A	LTR	ERV1	ERV1
8.01574	-1.59895	0.757632	-2.11046	0.034819	0.211357	Not sig	ID_B1_chr9-123562036-123562140	-	ID_B1	SINE	B4	SINE
6.91209	-1.62849	0.765134	-2.12837	0.0333061	0.205979	Not sig	Lx2_chr9-116820418-116821254	+	Lx2	LINE	L1	LINE
9.30157	-1.63586	0.690379	-2.36951	0.0178118	0.143161	Not sig	PB1D7_chr4-149234660-149234772	+	PB1D7	SINE	Alu	SINE
19.873	-1.63691	0.529861	-3.08931	0.00200623	0.0336357	Down	L1_Mm_chrY-90797085-90797931	-	L1_Mm	LINE	L1	LINE
13.6633	-1.65105	0.578883	-2.85212	0.00434284	0.0588057	Not sig	L1MA5_chr9-123483711-123484005	-	L1MA5	LINE	L1	LINE
26.7421	-1.65974	0.437601	-3.79282	0.000148946	0.00488588	Down	MIRc_chr4-150858373-150858479	+	MIRc	SINE	MIR	SINE
7.86523	-1.67237	0.818889	-2.04225	0.0411271	0.227875	Not sig	B3_chr9-116951869-116952080	-	B3	SINE	B2	SINE
6.82695	-1.68803	0.803211	-2.10161	0.0355878	0.212717	Not sig	B3_chrX-162784865-162784963	+	B3	SINE	B2	SINE
6.62648	-1.68993	0.800944	-2.10992	0.034865	0.211357	Not sig	B1_Mur2_chr6-146943093-146943218	+	B1_Mur2	SINE	Alu	SINE
8.29176	-1.75029	0.765493	-2.28648	0.0222261	0.165149	Not sig	B1_Mus2_chrY-90802941-90803085	-	B1_Mus2	SINE	Alu	SINE
9.54905	-1.80806	0.750282	-2.40984	0.0159596	0.133512	Not sig	L1M4c_chr4-155635478-155635800	-	L1M4c	LINE	L1	LINE
7.48646	-1.82722	0.781348	-2.33855	0.0193586	0.148977	Not sig	L1MB3_chr19-55329522-55329826	+	L1MB3	LINE	L1	LINE
8.84182	-1.83811	0.774651	-2.37283	0.0176526	0.142953	Not sig	RSINE1_chr9-116798028-116798208	-	RSINE1	SINE	B4	SINE
6.76326	-1.84256	1.8233	-1.01056	0.312226	0.627825	Not sig	MTEa_chr9-116891369-116891707	+	MTEa	LTR	ERVL-MaLR	ERVL
8.0477	-1.8609	0.73932	-2.51705	0.0118343	0.108171	Not sig	B3A_chr6-146901980-146902151	+	B3A	SINE	B2	SINE
11.269	-1.87317	0.67806	-2.76254	0.0057354	0.0699327	Not sig	L1_Mm_chrY-90809579-90810334	-	L1_Mm	LINE	L1	LINE
7.44562	-1.87528	0.795155	-2.35838	0.0183548	0.144814	Not sig	L1Md_F2_chr19-60975318-60976882	+	L1Md_F2	LINE	L1	LINE
10.6918	-1.89265	0.673795	-2.80894	0.00497049	0.0638722	Not sig	RMER13A2_chr9-113666030-113666850	+	RMER13A2	LTR	ERVK	ERVK
6.71627	-1.89944	0.787648	-2.41153	0.0158856	0.133512	Not sig	L1MC4a_chr9-123117663-123118270	+	L1MC4a	LINE	L1	LINE
16.9764	-1.93101	0.528988	-3.65039	0.000261842	0.00720402	Down	L1Md_F2_chr5-151184364-151184553	+	L1Md_F2	LINE	L1	LINE
7.72934	-1.93447	0.769139	-2.51511	0.0118995	0.108204	Not sig	ORR1D2_chr4-145430346-145430700	-	ORR1D2	LTR	ERVL-MaLR	ERVL
6.74308	-1.95226	1.61763	-1.20686	0.227485	0.550995	Not sig	MTC_chr16-84994199-84994549	+	MTC	LTR	ERVL-MaLR	ERVL
7.72204	-1.95557	0.834212	-2.34421	0.0190675	0.14848	Not sig	B3_chr5-151052115-151052299	+	B3	SINE	B2	SINE
8.36909	-2.05431	0.796089	-2.5805	0.00986567	0.0975656	Not sig	L1ME1_chr5-151090691-151090906	+	L1ME1	LINE	L1	LINE
11.7747	-2.07819	0.615918	-3.37413	0.000740489	0.0166592	Down	MT2B_chr19-60774819-60774883	+	MT2B	LTR	ERVL	ERVL
10.6462	-2.088	0.667982	-3.12583	0.00177304	0.0309345	Down	L1M4_chr7-143248761-143249006	-	L1M4	LINE	L1	LINE
6.56989	-2.11164	0.85203	-2.47836	0.0131988	0.11753	Not sig	RSINE1_chr5-151162979-151163134	+	RSINE1	SINE	B4	SINE
8.50719	-2.11572	0.806536	-2.62322	0.00871035	0.0932406	Not sig	RMER17C2_chr5-151075708-151075924	+	RMER17C2	LTR	ERVK	ERVK
7.64291	-2.1187	1.2698	-1.66854	0.0952092	0.360351	Not sig	B3A_chr6-140490627-140490680	+	B3A	SINE	B2	SINE
18.6786	-2.26004	0.538505	-4.19689	2.7061e-05	0.00109571	Down	Plat_L3_chr16-92668040-92668129	-	Plat_L3	LINE	CR1	LINE
8.97218	-2.27046	0.716928	-3.16693	0.00154058	0.0282571	Down	MIR_chr5-151138324-151138405	+	MIR	SINE	MIR	SINE
18.3016	-2.28793	0.526314	-4.34709	1.37959e-05	0.00061679	Down	B3_chr5-151169281-151169461	-	B3	SINE	B2	SINE
6.99851	-2.31151	0.89126	-2.59353	0.00949961	0.0957097	Not sig	RSINE1_chr19-55399312-55399451	+	RSINE1	SINE	B4	SINE
12.6882	-2.32967	0.604186	-3.85587	0.000115317	0.00399145	Down	ORR1A2_chr5-151158242-151158556	+	ORR1A2	LTR	ERVL-MaLR	ERVL
7.4303	-2.7644	0.851642	-3.24597	0.00117053	0.0232588	Down	RMER6A_chr6-148812581-148813287	+	RMER6A	LTR	ERVK	ERVK
9.55037	-2.86289	0.763446	-3.74996	0.00017686	0.00542201	Down	MTD_chr5-151134421-151134799	-	MTD	LTR	ERVL-MaLR	ERVL
6.56883	-3.37167	0.980484	-3.43878	0.000584342	0.0134838	Down	L1M5_chr4-145090554-145091050	-	L1M5	LINE	L1	LINE
45.9273	1.46617	0.331335	4.42502	9.6432e-06	0.00043095	Up	G-rich_chr19-58432271-58432431	G-rich	Low_complexity	Low_complexity
3.55033	1.46558	1.22222	1.19911	0.230484	0.655001	Not sig	B3_chr9-122307156-122307336	B3	B2	SINE
2.89622	1.465	1.39635	1.04916	0.294102	0.720504	Not sig	ID4__chr9-116158653-116158729	ID4_	ID	SINE
3.30459	1.46433	1.3467	1.08734	0.276886	0.702177	Not sig	B4_chr7-143801717-143801980	B4	B4	SINE
9.29318	1.46424	0.737863	1.98443	0.047208	0.303369	Not sig	B3_chr4-150325095-150325278	B3	B2	SINE
5.88387	1.46408	0.927629	1.5783	0.114497	0.488837	Not sig	ORR1D1_chr9-114414839-114415200	ORR1D1	ERVL-MaLR	LTR
4.02872	1.46331	1.08875	1.34403	0.17894	0.593642	Not sig	(TG)n_chr9-120988600-120988773	(TG)n	Simple_repeat	Simple_repeat
11.3484	1.46289	0.693162	2.11045	0.0348195	0.254405	Not sig	MLT1B_chr16-92729529-92729643	MLT1B	ERVL-MaLR	LTR
3.30616	1.46274	1.2828	1.14027	0.254175	0.675839	Not sig	MLT1A-int_chr16-90877391-90877644	MLT1A-int	ERVL-MaLR	LTR
2.04078	1.46166	1.56797	0.932202	0.351232	0.765882	Not sig	RLTR20A4_chr3-159516933-159517028	RLTR20A4	ERVK	LTR
5.33539	1.46161	0.970377	1.50623	0.132007	0.522497	Not sig	L1M8_chr16-94621309-94621423	L1M8	L1	LINE
2.20453	1.46127	1.65284	0.8841	0.376642	0.781765	Not sig	B4A_chr7-142983965-142984237	B4A	B4	SINE
2.93764	1.46105	1.41926	1.02945	0.303268	0.729677	Not sig	B4_chr16-90963257-90963553	B4	B4	SINE
2.73194	1.46097	1.34194	1.08871	0.276284	0.701351	Not sig	B4A_chr4-149916041-149916205	B4A	B4	SINE
3.50118	1.4598	1.28394	1.13697	0.255551	0.678574	Not sig	(GGA)n_chr16-92444587-92444642	(GGA)n	Simple_repeat	Simple_repeat
4.66704	1.45925	1.10299	1.32299	0.185837	0.602475	Not sig	LTR33A_chrX-162050325-162050622	LTR33A	ERVL	LTR
13.3075	1.45918	0.622456	2.34422	0.0190667	0.170751	Not sig	MLT1D_chr13-116974362-116974644	MLT1D	ERVL-MaLR	LTR
8.45152	1.45897	0.774902	1.88277	0.0597309	0.343915	Not sig	BC1_Mm_chr13-117015078-117015139	BC1_Mm	scRNA	scRNA
21.078	1.45782	0.493	2.95704	0.00310611	0.0483231	Up	RSINE1_chr13-117018273-117018445	RSINE1	B4	SINE
16.885	1.45631	0.551676	2.63979	0.00829564	0.0970435	Not sig	L2_chr4-150266528-150267148	L2	L2	LINE
2.56441	1.45625	1.35191	1.07718	0.281401	0.705791	Not sig	ORR1D1_chr5-151380378-151380610	ORR1D1	ERVL-MaLR	LTR
2.12739	1.4555	1.65373	0.880129	0.37879	0.782308	Not sig	B1_Mus2_chr7-141578920-141578958	B1_Mus2	Alu	SINE
2.90004	1.45482	1.34751	1.07963	0.280305	0.705036	Not sig	B4A_chr13-119761062-119761298	B4A	B4	SINE
2.00173	1.45435	1.53399	0.948081	0.343088	0.758813	Not sig	MER20B_chr16-92237420-92237804	MER20B	hAT-Charlie	DNA
12.1595	1.45434	0.656956	2.21376	0.0268455	0.211714	Not sig	MLT1C_chr16-90865122-90865323	MLT1C	ERVL-MaLR	LTR
2.03314	1.45401	1.67106	0.870113	0.384239	0.785103	Not sig	(TCCC)n_chr9-119455845-119455920	(TCCC)n	Simple_repeat	Simple_repeat
2.94528	1.45356	1.32062	1.10067	0.271041	0.696196	Not sig	C-rich_chrX-161956880-161956945	C-rich	Low_complexity	Low_complexity
2.39357	1.4527	1.44841	1.00296	0.315878	0.740675	Not sig	B2_Mm2_chr16-94462838-94463018	B2_Mm2	B2	SINE
7.72575	1.45268	0.888384	1.63519	0.102009	0.459383	Not sig	MLT1C_chr4-149903087-149903173	MLT1C	ERVL-MaLR	LTR
2.16926	1.452	1.56926	0.925275	0.354823	0.768101	Not sig	B4_chr19-58344716-58344981	B4	B4	SINE
3.13756	1.45151	1.27022	1.14272	0.253154	0.675583	Not sig	AT_rich_chr4-150386154-150386182	AT_rich	Low_complexity	Low_complexity
27.4846	1.45071	0.454342	3.19299	0.00140808	0.0266328	Up	B4_chr6-143174911-143175081	B4	B4	SINE
29.0657	1.45041	0.423637	3.42372	0.000617704	0.0140085	Up	B1F2_chr13-117017660-117017766	B1F2	Alu	SINE
2.71432	1.45014	1.35013	1.07408	0.282788	0.70684	Not sig	B1_Mm_chrX-169078631-169078778	B1_Mm	Alu	SINE
2.86805	1.44773	1.411	1.02603	0.304876	0.731663	Not sig	RMER1B_chr16-87760187-87761233	RMER1B	Other	Other
3.68985	1.44753	1.17725	1.22959	0.218851	0.640993	Not sig	ORR1A2_chr19-58253459-58253769	ORR1A2	ERVL-MaLR	LTR
6.63413	1.44723	0.935062	1.54774	0.121685	0.501822	Not sig	MLT2B3_chr7-145191938-145192090	MLT2B3	ERVL	LTR
2.57488	1.44666	1.3932	1.03838	0.299095	0.725693	Not sig	B1_Mus1_chr14-124355083-124355221	B1_Mus1	Alu	SINE
2.71822	1.44615	1.35493	1.06733	0.285825	0.710536	Not sig	PB1D10_chr9-113648917-113649023	PB1D10	Alu	SINE
3.38463	1.44612	1.28006	1.12973	0.258591	0.682528	Not sig	Lx9_chr13-118976092-118976192	Lx9	L1	LINE
2.5468	1.4456	1.35616	1.06595	0.286446	0.710657	Not sig	B1_Mus1_chr6-143173286-143173428	B1_Mus1	Alu	SINE
4.48141	1.44543	1.11288	1.29882	0.194006	0.61356	Not sig	MER21B_chr16-96146703-96146840	MER21B	ERVL	LTR
10.422	1.44494	0.70689	2.04409	0.040945	0.281293	Not sig	MLTR25A_chr16-96057992-96058123	MLTR25A	ERVK	LTR
6.53655	1.4447	0.880054	1.6416	0.100672	0.456424	Not sig	MTA_Mm_chr6-149302988-149303383	MTA_Mm	ERVL-MaLR	LTR
5.78533	1.44445	0.924383	1.56261	0.118145	0.496051	Not sig	L2a_chr16-96090062-96090305	L2a	L2	LINE
2.54347	1.4434	1.37467	1.05	0.293719	0.720079	Not sig	L1Md_A_chr9-118004827-118011384	L1Md_A	L1	LINE
5.68501	1.44285	1.01396	1.42298	0.154743	0.560113	Not sig	MIRc_chr9-123452408-123452594	MIRc	MIR	SINE
4.50674	1.44223	1.0969	1.31483	0.188567	0.606566	Not sig	MT2A_chr16-94412847-94413184	MT2A	ERVL	LTR
7.01059	1.4418	0.868499	1.6601	0.0968942	0.446841	Not sig	B3_chr19-55590203-55590357	B3	B2	SINE
22.0165	1.44136	0.496303	2.90419	0.0036821	0.0548504	Not sig	MER20_chr16-92737921-92738093	MER20	hAT-Charlie	DNA
10.1162	1.44002	0.715828	2.01168	0.0442534	0.293123	Not sig	B3A_chr16-94464884-94465009	B3A	B2	SINE
3.45844	1.43891	1.24211	1.15845	0.246682	0.669327	Not sig	B3_chr4-147895447-147895643	B3	B2	SINE
3.67224	1.43871	1.16667	1.23318	0.217508	0.63911	Not sig	PB1D10_chr3-159529617-159529729	PB1D10	Alu	SINE
17.4426	1.4377	0.574216	2.50376	0.0122883	0.127498	Not sig	MER94B_chr13-117007023-117007117	MER94B	hAT-Blackjack	DNA
8.00315	1.43681	0.801591	1.79245	0.0730613	0.383537	Not sig	ORR1D1_chr4-153995663-153995981	ORR1D1	ERVL-MaLR	LTR
6.44516	1.43642	0.92967	1.54509	0.122325	0.50304	Not sig	B3A_chr19-60208733-60208951	B3A	B2	SINE
5.28595	1.43583	0.973221	1.47534	0.140121	0.537036	Not sig	B1F2_chr4-151026977-151027116	B1F2	Alu	SINE
2.35834	1.43391	1.49955	0.956229	0.338957	0.75517	Not sig	ORR1D1_chr9-123513696-123514005	ORR1D1	ERVL-MaLR	LTR
3.8469	1.43286	1.17184	1.22274	0.221426	0.645492	Not sig	(CA)n_chr16-90832087-90832133	(CA)n	Simple_repeat	Simple_repeat
13.3549	1.43284	0.626514	2.28699	0.0221961	0.186789	Not sig	ORR1D2_chr19-58416372-58416685	ORR1D2	ERVL-MaLR	LTR
8.96835	1.43256	0.86473	1.65665	0.0975893	0.448691	Not sig	PB1_chr6-146970851-146970914	PB1	Alu	SINE
4.47093	1.43164	1.05573	1.35607	0.175077	0.589214	Not sig	RMER20B_chr9-121185585-121186130	RMER20B	ERVK	LTR
2.12746	1.43123	1.67487	0.854529	0.392812	0.792053	Not sig	RSINE1_chr16-94513208-94513334	RSINE1	B4	SINE
2.12689	1.43095	1.67509	0.854254	0.392965	0.792127	Not sig	B3_chr19-61050326-61050400	B3	B2	SINE
4.29676	1.42972	1.13162	1.26343	0.206435	0.626892	Not sig	B4A_chr19-56571842-56571968	B4A	B4	SINE
17.246	1.42967	0.541785	2.63881	0.00831971	0.097158	Not sig	MLTR18_MM_chr6-143173764-143174160	MLTR18_MM	ERVK	LTR
9.43193	1.42921	0.777971	1.83709	0.0661962	0.363012	Not sig	B4A_chr19-57374100-57374226	B4A	B4	SINE
24.1821	1.42891	0.463722	3.0814	0.00206031	0.0353955	Up	RMER13A2_chr9-122983683-122984377	RMER13A2	ERVK	LTR
3.37083	1.42863	1.22579	1.16547	0.243828	0.666337	Not sig	ID4_chr16-91869187-91869284	ID4	ID	SINE
12.6209	1.42752	0.655013	2.17938	0.0293035	0.22538	Not sig	GA-rich_chr16-92769100-92769156	GA-rich	Low_complexity	Low_complexity
23.3439	1.42696	0.468368	3.04668	0.00231386	0.0382613	Up	ID_B1_chr6-146824224-146824362	ID_B1	B4	SINE
3.06719	1.42682	1.29619	1.10078	0.270992	0.696196	Not sig	ID_B1_chr13-116960481-116960574	ID_B1	B4	SINE
9.24285	1.42669	0.753106	1.89441	0.0581705	0.340823	Not sig	(TGGGGG)n_chr4-155179877-155179901	(TGGGGG)n	Simple_repeat	Simple_repeat
2.5188	1.42596	1.46387	0.9741	0.330007	0.748945	Not sig	BC1_Mm_chr11-121305307-121305323	BC1_Mm	scRNA	scRNA
7.91951	1.4257	0.827447	1.72301	0.0848874	0.414938	Not sig	B3_chr19-60197472-60197680	B3	B2	SINE
9.14801	1.42385	0.734273	1.93913	0.0524858	0.320421	Not sig	MIR_chr16-94395596-94395764	MIR	MIR	SINE
5.16217	1.42344	0.988348	1.44022	0.149805	0.554066	Not sig	(GGA)n_chr6-146829047-146829161	(GGA)n	Simple_repeat	Simple_repeat
41.6715	1.42222	0.353787	4.02	5.81986e-05	0.00195544	Up	B4_chr4-155726277-155726464	B4	B4	SINE
6.05997	1.42213	0.910404	1.56209	0.118268	0.496102	Not sig	B3A_chr19-58431603-58431783	B3A	B2	SINE
12.262	1.42129	0.638601	2.22563	0.0260387	0.207406	Not sig	L1M3_chr4-152187380-152187518	L1M3	L1	LINE
2.37213	1.42112	1.44909	0.980697	0.326742	0.748015	Not sig	Charlie2b_chr16-94209979-94210178	Charlie2b	hAT-Charlie	DNA
2.5369	1.42109	1.51746	0.93649	0.349021	0.76369	Not sig	B4A_chr9-122679819-122680021	B4A	B4	SINE
3.24517	1.42022	1.2082	1.17548	0.239803	0.662588	Not sig	B3_chr19-58410410-58410621	B3	B2	SINE
10.3562	1.42003	0.689126	2.06063	0.0393383	0.274387	Not sig	ORR1E_chr4-151009839-151010130	ORR1E	ERVL-MaLR	LTR
4.2715	1.41989	1.11321	1.2755	0.202133	0.621889	Not sig	BGLII_B2_chr4-150835791-150836219	BGLII_B2	ERVK	LTR
17.3883	1.41979	0.528443	2.68673	0.00721551	0.0891177	Not sig	B4A_chr19-58420663-58420924	B4A	B4	SINE
19.9475	1.41934	0.520267	2.72811	0.00636987	0.0813416	Not sig	Lx4B_chr4-155719851-155720037	Lx4B	L1	LINE
5.25902	1.41711	1.14061	1.24241	0.214087	0.635599	Not sig	MLT1A1_chr9-117904319-117904445	MLT1A1	ERVL-MaLR	LTR
19.9358	1.41608	0.508759	2.7834	0.00537922	0.0722498	Not sig	RLTR19-int_chr9-123689317-123689427	RLTR19-int	ERVK	LTR
2.52536	1.41604	1.41965	0.997459	0.318542	0.742721	Not sig	B1_Mur4_chrX-162080172-162080315	B1_Mur4	Alu	SINE
4.49244	1.41586	1.03288	1.37079	0.170439	0.583419	Not sig	B2_Mm2_chr7-143562409-143562524	B2_Mm2	B2	SINE
4.86567	1.4157	1.0258	1.3801	0.167557	0.579354	Not sig	MLT1A0_chr9-123502331-123502654	MLT1A0	ERVL-MaLR	LTR
8.6917	1.4149	0.792088	1.78629	0.0740529	0.385807	Not sig	B4_chr9-121320394-121320496	B4	B4	SINE
6.35651	1.41465	0.935823	1.51167	0.130619	0.519398	Not sig	MLTR14_chr19-57964647-57965137	MLTR14	ERV1	LTR
5.42452	1.41348	0.974718	1.45015	0.147017	0.548707	Not sig	B3A_chr6-146188664-146188865	B3A	B2	SINE
6.29757	1.41268	0.899727	1.57012	0.116388	0.493369	Not sig	MLT1K_chr19-55619351-55619644	MLT1K	ERVL-MaLR	LTR
30.266	1.41002	0.424704	3.32001	0.00090014	0.0187651	Up	Tigger7_chr16-92798276-92798776	Tigger7	TcMar-Tigger	DNA
6.09141	1.40958	0.899125	1.56772	0.116946	0.494482	Not sig	MER63B_chr16-91498133-91498323	MER63B	hAT-Blackjack	DNA
8.06506	1.40939	0.790321	1.78332	0.0745342	0.386814	Not sig	RSINE1_chr9-121405661-121405798	RSINE1	B4	SINE
3.35604	1.40937	1.22427	1.15119	0.249653	0.671939	Not sig	(CA)n_chr9-117858025-117858365	(CA)n	Simple_repeat	Simple_repeat
10.6852	1.40898	0.703408	2.00308	0.0451685	0.296107	Not sig	RMER13A1_chr19-61003446-61003705	RMER13A1	ERVK	LTR
4.43968	1.40851	1.15928	1.21499	0.224371	0.647104	Not sig	B4A_chr6-146916810-146917053	B4A	B4	SINE
3.01709	1.4072	1.38585	1.01541	0.309912	0.735262	Not sig	(CAGA)n_chr4-149627738-149627793	(CAGA)n	Simple_repeat	Simple_repeat
3.69453	1.40504	1.21185	1.15942	0.246285	0.668979	Not sig	(CACCC)n_chr4-155905585-155905606	(CACCC)n	Simple_repeat	Simple_repeat
13.3254	1.4048	0.617147	2.27628	0.0228292	0.190243	Not sig	URR1B_chr4-156220794-156220934	URR1B	hAT-Charlie	DNA
2.89904	1.40443	1.50997	0.930101	0.352319	0.766057	Not sig	RSINE1_chr6-144070774-144070923	RSINE1	B4	SINE
2.67584	1.40436	1.35614	1.03556	0.300406	0.727088	Not sig	B4_chr18-90512649-90512946	B4	B4	SINE
3.91879	1.4041	1.11646	1.25764	0.208523	0.628648	Not sig	CT-rich_chr16-90865339-90865484	CT-rich	Low_complexity	Low_complexity
5.51818	1.4032	1.00722	1.39314	0.163579	0.571377	Not sig	B1_Mus1_chr19-60920846-60920976	B1_Mus1	Alu	SINE
6.66513	1.40178	0.932958	1.50251	0.132967	0.523257	Not sig	MIRb_chr9-119338371-119338475	MIRb	MIR	SINE
25.2141	1.4015	0.475397	2.94807	0.00319763	0.0492607	Up	PB1D10_chr9-118954293-118954415	PB1D10	Alu	SINE
6.478	1.40046	0.951531	1.47179	0.141077	0.539883	Not sig	B3_chr6-146893231-146893405	B3	B2	SINE
5.37558	1.39936	1.00013	1.39918	0.16176	0.569828	Not sig	(TCTCTG)n_chr4-154391148-154391244	(TCTCTG)n	Simple_repeat	Simple_repeat
5.51444	1.39925	0.945096	1.48054	0.138729	0.535152	Not sig	B4_chr9-119931529-119931706	B4	B4	SINE
13.8057	1.39847	0.598701	2.33584	0.0194997	0.173562	Not sig	ORR1D1_chr4-147924078-147924443	ORR1D1	ERVL-MaLR	LTR
9.84268	1.3978	0.715588	1.95336	0.0507775	0.314549	Not sig	B3_chr13-117011625-117011833	B3	B2	SINE
4.29193	1.39764	1.14802	1.21743	0.223439	0.647104	Not sig	RLTR17_chr19-55106877-55107541	RLTR17	ERVK	LTR
2.08459	1.39593	1.70782	0.817373	0.413715	0.803578	Not sig	B2_Mm1a_chr4-152137642-152137838	B2_Mm1a	B2	SINE
16.6992	1.39528	0.563915	2.47427	0.0133509	0.13484	Not sig	MTE2b_chr16-94464203-94464348	MTE2b	ERVL-MaLR	LTR
10.8243	1.39456	0.699776	1.99287	0.0462758	0.299489	Not sig	ORR1D2_chr16-94679826-94680141	ORR1D2	ERVL-MaLR	LTR
5.58065	1.39352	1.06988	1.3025	0.192746	0.611838	Not sig	MTEa_chr16-96187022-96187280	MTEa	ERVL-MaLR	LTR
2.35126	1.39249	1.54675	0.900267	0.367978	0.776539	Not sig	RSINE1_chr9-114457106-114457257	RSINE1	B4	SINE
15.917	1.39203	0.596775	2.33258	0.0196701	0.173886	Not sig	PB1_chr19-56793120-56793198	PB1	Alu	SINE
4.09403	1.3918	1.16427	1.19543	0.23192	0.656083	Not sig	B3_chr13-119460631-119460837	B3	B2	SINE
2.52211	1.39119	1.43164	0.971745	0.331177	0.749003	Not sig	(TTCC)n_chr16-94787737-94787872	(TTCC)n	Simple_repeat	Simple_repeat
7.63142	1.39004	0.809519	1.71711	0.0859587	0.417876	Not sig	MTD_chr4-151029962-151030203	MTD	ERVL-MaLR	LTR
52.6247	1.38933	0.339676	4.09018	4.31045e-05	0.00151227	Up	B4_chr16-92784133-92784394	B4	B4	SINE
3.55558	1.38894	1.18217	1.1749	0.240033	0.662588	Not sig	B4A_chr16-94386961-94387213	B4A	B4	SINE
44.4549	1.38778	0.338933	4.09454	4.23002e-05	0.00149472	Up	Lx5_chr6-145799354-145800755	Lx5	L1	LINE
4.09682	1.3871	1.16148	1.19426	0.232377	0.656407	Not sig	CT-rich_chr15-102506056-102506111	CT-rich	Low_complexity	Low_complexity
3.20612	1.38659	1.26463	1.09644	0.272888	0.697801	Not sig	B3_chr19-60199764-60199943	B3	B2	SINE
4.01636	1.38593	1.15165	1.20343	0.228809	0.652733	Not sig	B3_chr16-92800047-92800236	B3	B2	SINE
8.55211	1.38463	0.773716	1.78958	0.073521	0.384808	Not sig	ORR1F_chr19-56785600-56785709	ORR1F	ERVL-MaLR	LTR
41.8046	1.38393	0.350871	3.94426	8.00482e-05	0.00261255	Up	B4A_chr19-56559338-56559504	B4A	B4	SINE
3.84119	1.38334	1.11838	1.23692	0.216118	0.636807	Not sig	URR1B_chr9-119934359-119934494	URR1B	hAT-Charlie	DNA
7.70324	1.38329	0.808546	1.71084	0.0871104	0.421825	Not sig	L2c_chr19-55512146-55512255	L2c	L2	LINE
3.86595	1.38272	1.10275	1.25389	0.209881	0.629808	Not sig	Lx5_chr19-60175341-60176197	Lx5	L1	LINE
5.29075	1.38188	0.981129	1.40846	0.158994	0.564886	Not sig	MIRb_chr19-58334618-58334778	MIRb	MIR	SINE
7.44924	1.38163	0.854563	1.61676	0.105929	0.46884	Not sig	MTEa_chr6-145806248-145806535	MTEa	ERVL-MaLR	LTR
3.13899	1.38119	1.24548	1.10896	0.267448	0.692132	Not sig	MIRc_chr19-58398238-58398347	MIRc	MIR	SINE
2.30832	1.38098	1.48303	0.93119	0.351755	0.765964	Not sig	MT2A_chr4-151046697-151047140	MT2A	ERVL	LTR
5.94007	1.38018	0.908824	1.51864	0.128852	0.516219	Not sig	MLT1C_chr11-121198992-121199291	MLT1C	ERVL-MaLR	LTR
3.33185	1.38016	1.20937	1.14123	0.253776	0.675715	Not sig	C-rich_chr19-61064103-61064201	C-rich	Low_complexity	Low_complexity
4.45251	1.37919	1.13348	1.21678	0.223687	0.647104	Not sig	B2_Mm2_chr4-147916985-147917167	B2_Mm2	B2	SINE
4.4938	1.37794	1.07962	1.27631	0.201844	0.621531	Not sig	RSINE1_chr9-114712460-114712604	RSINE1	B4	SINE
41.0751	1.37757	0.34997	3.93625	8.27653e-05	0.00267569	Up	MTD_chr16-92768364-92768759	MTD	ERVL-MaLR	LTR
24.1112	1.37617	0.471872	2.9164	0.00354097	0.0532118	Not sig	B4_chr16-90848062-90848369	B4	B4	SINE
2.14124	1.37513	1.64248	0.837231	0.402463	0.797131	Not sig	Lx5_chr14-124647422-124648026	Lx5	L1	LINE
16.015	1.37448	0.600943	2.28721	0.0221834	0.186789	Not sig	URR1B_chr16-94402556-94402689	URR1B	hAT-Charlie	DNA
6.52388	1.37295	0.9382	1.46339	0.143362	0.543655	Not sig	RSINE1_chr6-148885033-148885188	RSINE1	B4	SINE
3.3623	1.37265	1.29396	1.06081	0.288776	0.713705	Not sig	B4A_chr9-120989502-120989759	B4A	B4	SINE
6.54092	1.37213	0.878949	1.56111	0.118498	0.496102	Not sig	B3A_chr7-144478651-144478829	B3A	B2	SINE
5.67344	1.37153	1.02238	1.34151	0.179756	0.594328	Not sig	Lx6_chr19-60937106-60938659	Lx6	L1	LINE
11.9716	1.37094	0.654467	2.09474	0.036194	0.260806	Not sig	RSINE1_chr19-57474762-57474853	RSINE1	B4	SINE
3.65273	1.37051	1.18773	1.15389	0.248544	0.671104	Not sig	B1_Mus2_chr9-123122638-123122784	B1_Mus2	Alu	SINE
3.36662	1.37022	1.26319	1.08473	0.278039	0.70263	Not sig	MTEa_chr19-56565066-56565437	MTEa	ERVL-MaLR	LTR
5.61549	1.36906	0.935968	1.46272	0.143545	0.543655	Not sig	Lx8_chr9-118982082-118982570	Lx8	L1	LINE
3.50996	1.36905	1.23451	1.10898	0.26744	0.692132	Not sig	MLT1A0_chr19-58376004-58376346	MLT1A0	ERVL-MaLR	LTR
10.7444	1.36898	0.742385	1.84403	0.0651793	0.359261	Not sig	B4A_chr16-96031040-96031210	B4A	B4	SINE
4.2287	1.3684	1.06906	1.28	0.200544	0.619756	Not sig	PB1D10_chr16-90243709-90243814	PB1D10	Alu	SINE
2.29128	1.36756	1.53327	0.891921	0.372435	0.779471	Not sig	B1_Mur4_chr4-148542143-148542286	B1_Mur4	Alu	SINE
2.29128	1.36756	1.53327	0.891921	0.372435	0.779471	Not sig	B4_chr16-85029749-85029891	B4	B4	SINE
10.3111	1.36622	0.69515	1.96536	0.0493722	0.310849	Not sig	B4A_chr9-118986319-118986583	B4A	B4	SINE
11.2382	1.36492	0.695091	1.96366	0.0495693	0.311517	Not sig	Zaphod3_chr16-90872680-90872853	Zaphod3	hAT-Tip100	DNA
7.22155	1.36471	0.87375	1.5619	0.118312	0.496102	Not sig	(T)n_chr9-118947255-118947328	(T)n	Simple_repeat	Simple_repeat
2.13028	1.36378	1.68014	0.811702	0.416963	0.805	Not sig	MIRc_chr7-144595800-144595851	MIRc	MIR	SINE
3.82977	1.36373	1.22681	1.11161	0.266306	0.691044	Not sig	IMPB_01_chr19-58243458-58243543	IMPB_01	Satellite	Satellite
4.38251	1.36345	1.05694	1.29001	0.197049	0.616891	Not sig	(TG)n_chr4-153978506-153978575	(TG)n	Simple_repeat	Simple_repeat
7.53924	1.3624	0.836807	1.62809	0.103506	0.463017	Not sig	MLT1H_chr7-145230563-145230679	MLT1H	ERVL-MaLR	LTR
2.04271	1.36181	1.68703	0.807221	0.419539	0.806693	Not sig	L2b_chr16-94690653-94690744	L2b	L2	LINE
6.63474	1.36158	0.885572	1.53752	0.124166	0.506639	Not sig	ID_B1_chr9-116134950-116135147	ID_B1	B4	SINE
2.47592	1.36138	1.41785	0.96017	0.33697	0.753293	Not sig	ORR1A2_chr4-152209181-152209496	ORR1A2	ERVL-MaLR	LTR
2.8282	1.36113	1.3691	0.994174	0.320138	0.744159	Not sig	Lx9_chr9-122964347-122964896	Lx9	L1	LINE
20.0286	1.36087	0.491416	2.76929	0.00561789	0.0746935	Not sig	L1_Mus4_chr19-55433238-55436448	L1_Mus4	L1	LINE
3.62748	1.3601	1.19022	1.14273	0.25315	0.675583	Not sig	ORR1F_chr6-142348195-142348281	ORR1F	ERVL-MaLR	LTR
2.57631	1.35987	1.39352	0.975853	0.329137	0.748945	Not sig	Lx_chr14-124070756-124071904	Lx	L1	LINE
2.44784	1.3591	1.37093	0.991369	0.321505	0.744998	Not sig	B3A_chr9-116106141-116106295	B3A	B2	SINE
9.57323	1.35852	0.7394	1.83733	0.0661612	0.363012	Not sig	IMPB_01_chr4-154416166-154416247	IMPB_01	Satellite	Satellite
6.13624	1.3582	0.963199	1.4101	0.158511	0.564347	Not sig	(CA)n_chr6-146363937-146363987	(CA)n	Simple_repeat	Simple_repeat
4.88902	1.35782	1.00474	1.35141	0.176564	0.590345	Not sig	B4A_chr9-121263002-121263268	B4A	B4	SINE
3.97356	1.35736	1.11592	1.21636	0.223848	0.647104	Not sig	RLTR20C1_MM_chr6-145774677-145774750	RLTR20C1_MM	ERVK	LTR
9.25392	1.35731	0.726996	1.86701	0.0618996	0.350218	Not sig	MLTR14_chr7-143705352-143705679	MLTR14	ERV1	LTR
7.09112	1.35726	0.830639	1.63399	0.10226	0.460001	Not sig	B4A_chr19-58368261-58368500	B4A	B4	SINE
5.27271	1.35693	0.971255	1.39709	0.162386	0.569978	Not sig	MIR3_chr9-117900597-117900703	MIR3	MIR	SINE
3.10102	1.35676	1.34873	1.00595	0.31444	0.739723	Not sig	B3_chr16-94593267-94593487	B3	B2	SINE
4.07438	1.35614	1.32446	1.02392	0.305872	0.732092	Not sig	Lx5c_chr14-124326226-124328160	Lx5c	L1	LINE
5.22312	1.35528	1.0068	1.34613	0.17826	0.593407	Not sig	HAL1_chr16-96161224-96161523	HAL1	L1	LINE
9.20296	1.3539	0.775459	1.74593	0.0808229	0.404855	Not sig	B3A_chr16-90983091-90983207	B3A	B2	SINE
9.07768	1.35285	0.75818	1.78434	0.0743691	0.386397	Not sig	PB1D7_chr9-118550766-118550876	PB1D7	Alu	SINE
2.46163	1.35252	1.42755	0.947445	0.343412	0.758914	Not sig	MLT1B_chr16-92420651-92420947	MLT1B	ERVL-MaLR	LTR
15.5696	1.35245	0.569978	2.37281	0.0176533	0.162456	Not sig	MTB_chr6-146562509-146562884	MTB	ERVL-MaLR	LTR
40.9784	1.3523	0.360673	3.74939	0.000177266	0.00505024	Up	MER2_chr16-92815968-92816296	MER2	TcMar-Tigger	DNA
6.90598	1.35046	0.830088	1.62689	0.103761	0.463702	Not sig	ORR1C1_chr9-118989314-118989647	ORR1C1	ERVL-MaLR	LTR
5.40833	1.3503	0.954031	1.41536	0.156962	0.562822	Not sig	ID_B1_chr19-60578821-60579042	ID_B1	B4	SINE
14.2271	1.35028	0.602551	2.24095	0.0250296	0.202293	Not sig	MER20_chr16-92805159-92805282	MER20	hAT-Charlie	DNA
13.2518	1.34928	0.639874	2.10867	0.0349733	0.255072	Not sig	L1ME3A_chr6-146940139-146940333	L1ME3A	L1	LINE
7.07309	1.34864	0.881433	1.53005	0.126004	0.509796	Not sig	(CAGG)n_chr4-149075380-149075402	(CAGG)n	Simple_repeat	Simple_repeat
6.38284	1.34845	0.876862	1.53781	0.124094	0.506639	Not sig	RSINE1_chr19-58393984-58394075	RSINE1	B4	SINE
2.73012	1.34812	1.39642	0.965407	0.334341	0.751352	Not sig	B3_chr4-151757776-151757951	B3	B2	SINE
24.5339	1.34799	0.482698	2.79261	0.0052285	0.0707919	Not sig	ID4__chr4-151005667-151005746	ID4_	ID	SINE
23.5998	1.3465	0.509695	2.64178	0.00824715	0.0968722	Not sig	B3A_chr4-150504774-150504857	B3A	B2	SINE
12.2973	1.34606	0.624821	2.15431	0.0312156	0.235582	Not sig	MTC_chr13-119442224-119442612	MTC	ERVL-MaLR	LTR
2.80726	1.3458	1.34197	1.00285	0.315931	0.740675	Not sig	ID_B1_chr9-118962171-118962283	ID_B1	B4	SINE
2.80726	1.3458	1.34197	1.00285	0.315931	0.740675	Not sig	Lx4B_chr19-59806935-59808608	Lx4B	L1	LINE
2.29078	1.34442	1.48748	0.903826	0.366088	0.775441	Not sig	(TC)n_chr19-55532962-55533003	(TC)n	Simple_repeat	Simple_repeat
24.4187	1.34321	0.461412	2.9111	0.00360162	0.0539453	Not sig	GA-rich_chr19-60934384-60934540	GA-rich	Low_complexity	Low_complexity
2.9605	1.34292	1.31893	1.01819	0.308589	0.734048	Not sig	B4A_chr4-150813109-150813384	B4A	B4	SINE
10.3021	1.34214	0.704071	1.90625	0.0566171	0.33575	Not sig	L1Md_T_chr14-124491349-124496735	L1Md_T	L1	LINE
14.8821	1.34103	0.594081	2.25731	0.0239885	0.197616	Not sig	(TCCTG)n_chr16-92755230-92755254	(TCCTG)n	Simple_repeat	Simple_repeat
5.5174	1.34084	1.04186	1.28696	0.198107	0.617111	Not sig	RSINE1_chr19-58426463-58426624	RSINE1	B4	SINE
7.95614	1.34061	0.799556	1.6767	0.0936014	0.438924	Not sig	MIRc_chr9-118526691-118526848	MIRc	MIR	SINE
9.44381	1.33999	0.714836	1.87454	0.0608556	0.347474	Not sig	RSINE1_chr16-95706834-95706976	RSINE1	B4	SINE
24.6093	1.33665	0.454602	2.94027	0.00327929	0.0501288	Not sig	RLTR15_chr4-152254187-152254535	RLTR15	ERVK	LTR
5.30988	1.33653	0.997998	1.33922	0.180501	0.594808	Not sig	RLTR40_chr4-147919384-147919492	RLTR40	ERVK	LTR
2.76157	1.33634	1.36017	0.982481	0.325863	0.748007	Not sig	ORR1F_chr9-114430579-114430813	ORR1F	ERVL-MaLR	LTR
7.95659	1.33632	0.848473	1.57497	0.115264	0.490888	Not sig	B4A_chr4-149240986-149241250	B4A	B4	SINE
22.7383	1.33546	0.462996	2.88438	0.00392186	0.0573599	Not sig	B3_chr9-118969886-118970069	B3	B2	SINE
13.015	1.33527	0.62943	2.1214	0.033888	0.249821	Not sig	B3_chr4-151011458-151011652	B3	B2	SINE
22.1234	1.33506	0.475633	2.80692	0.00500176	0.0684675	Not sig	tRNA-Ala-GCY__chr7-144934396-144934447	tRNA-Ala-GCY_	tRNA	tRNA
2.056	1.3347	1.60635	0.830889	0.406036	0.798468	Not sig	(GGGA)n_chr19-59891847-59891876	(GGGA)n	Simple_repeat	Simple_repeat
2.056	1.3347	1.60635	0.830889	0.406036	0.798468	Not sig	B1F_chr9-121414097-121414199	B1F	Alu	SINE
8.43839	1.33375	0.762547	1.74907	0.080279	0.403609	Not sig	MLT1B_chr4-154513891-154514066	MLT1B	ERVL-MaLR	LTR
8.43407	1.33349	0.766174	1.74045	0.0817792	0.407555	Not sig	(TC)n_chr19-58361330-58361453	(TC)n	Simple_repeat	Simple_repeat
5.73643	1.33318	0.941918	1.41539	0.156954	0.562822	Not sig	ID_B1_chr19-57363522-57363714	ID_B1	B4	SINE
4.35392	1.33307	1.1023	1.20935	0.226529	0.649979	Not sig	MIRb_chr4-152098569-152098687	MIRb	MIR	SINE
2.37688	1.33304	1.4754	0.903513	0.366254	0.775673	Not sig	MLT1D_chr16-91397531-91397599	MLT1D	ERVL-MaLR	LTR
19.6808	1.33292	0.512968	2.59845	0.00936467	0.104626	Not sig	L2_chr4-149903191-149903421	L2	L2	LINE
5.14946	1.33289	1.0839	1.22971	0.218807	0.640993	Not sig	B4_chr19-56405984-56406211	B4	B4	SINE
7.38066	1.33215	0.806412	1.65195	0.0985457	0.451159	Not sig	L1MA6_chr4-154403353-154403975	L1MA6	L1	LINE
21.0919	1.33202	0.57418	2.31986	0.0203483	0.177125	Not sig	MTD_chr19-56589179-56589382	MTD	ERVL-MaLR	LTR
2.56251	1.33164	1.41611	0.940347	0.34704	0.761406	Not sig	GA-rich_chr13-116966544-116966609	GA-rich	Low_complexity	Low_complexity
5.70548	1.33155	0.940871	1.41523	0.157	0.562822	Not sig	ORR1A2_chr16-90752819-90753145	ORR1A2	ERVL-MaLR	LTR
5.83063	1.33108	0.9229	1.44228	0.149223	0.553237	Not sig	B1_Mur3_chr19-58414194-58414334	B1_Mur3	Alu	SINE
11.1538	1.33078	0.676587	1.9669	0.0491953	0.310164	Not sig	ID_B1_chr19-55582237-55582348	ID_B1	B4	SINE
5.82631	1.32958	0.935519	1.42123	0.155251	0.560216	Not sig	ORR1C2_chr6-145810770-145811066	ORR1C2	ERVL-MaLR	LTR
18.1475	1.32956	0.534935	2.48546	0.0129383	0.131891	Not sig	B3A_chr6-146903364-146903547	B3A	B2	SINE
4.09214	1.32925	1.18539	1.12136	0.262136	0.687404	Not sig	(GA)n_chr6-146379522-146379547	(GA)n	Simple_repeat	Simple_repeat
4.58337	1.32851	1.05497	1.25929	0.207926	0.627957	Not sig	B4_chr16-92737486-92737715	B4	B4	SINE
2.39832	1.32753	1.38716	0.957012	0.338561	0.754781	Not sig	C-rich_chr19-58021925-58022103	C-rich	Low_complexity	Low_complexity
2.6811	1.32675	1.4944	0.887816	0.37464	0.780457	Not sig	LTR16C_chr19-59836467-59836797	LTR16C	ERVL	LTR
4.46811	1.32669	1.08142	1.2268	0.219897	0.642679	Not sig	B1_Mur1_chr9-123444384-123444504	B1_Mur1	Alu	SINE
3.09669	1.32621	1.22673	1.08109	0.279657	0.704648	Not sig	Tigger13a_chr4-149068266-149068388	Tigger13a	TcMar-Tigger	DNA
2.86911	1.3236	1.37863	0.960085	0.337013	0.753293	Not sig	(TTCTC)n_chr4-144580922-144581085	(TTCTC)n	Simple_repeat	Simple_repeat
13.095	1.32316	0.650106	2.03529	0.0418213	0.284107	Not sig	LTR9D_chr4-152232685-152232849	LTR9D	ERV1	LTR
5.77339	1.32315	0.950354	1.39227	0.163842	0.571614	Not sig	Lx5_chr14-124317411-124318049	Lx5	L1	LINE
2.55545	1.32307	1.37713	0.960747	0.336679	0.753067	Not sig	L1MC4a_chr19-58056591-58057503	L1MC4a	L1	LINE
17.2971	1.32264	0.541103	2.44434	0.0145117	0.142173	Not sig	CT-rich_chr9-122187139-122187191	CT-rich	Low_complexity	Low_complexity
4.26918	1.32186	1.04671	1.26287	0.206637	0.626892	Not sig	MIR_chr11-121522072-121522236	MIR	MIR	SINE
2.89386	1.3212	1.34814	0.98002	0.327076	0.748015	Not sig	PB1D10_chr6-146943255-146943370	PB1D10	Alu	SINE
2.03839	1.32104	1.60053	0.825378	0.409157	0.801423	Not sig	(TTG)n_chr9-122982120-122982151	(TTG)n	Simple_repeat	Simple_repeat
2.41211	1.31994	1.4364	0.91892	0.358138	0.770537	Not sig	Lx_chr16-97906634-97906984	Lx	L1	LINE
10.2627	1.31962	0.713552	1.84937	0.0644044	0.35686	Not sig	RLTR9A3_chr4-149621251-149621533	RLTR9A3	ERVK	LTR
16.487	1.31944	0.571877	2.3072	0.0210435	0.181245	Not sig	B4A_chr16-91693200-91693315	B4A	B4	SINE
5.45321	1.31935	0.962467	1.3708	0.170437	0.583419	Not sig	MTD_chr16-94646577-94646913	MTD	ERVL-MaLR	LTR
3.0824	1.31911	1.2305	1.07201	0.283715	0.708252	Not sig	MLT1B_chr4-154540266-154540369	MLT1B	ERVL-MaLR	LTR
3.02956	1.31907	1.29436	1.01909	0.30816	0.733817	Not sig	ORR1E_chr9-116131390-116131491	ORR1E	ERVL-MaLR	LTR
8.30458	1.3182	0.787074	1.67482	0.0939703	0.439933	Not sig	B4A_chr16-85013169-85013379	B4A	B4	SINE
6.82035	1.31658	0.871667	1.51042	0.130937	0.52006	Not sig	(TGGGGG)n_chr6-145748032-145748052	(TGGGGG)n	Simple_repeat	Simple_repeat
4.11582	1.31638	1.18972	1.10646	0.268527	0.693112	Not sig	B4A_chr4-149276200-149276471	B4A	B4	SINE
7.37206	1.31635	0.851455	1.546	0.122105	0.502949	Not sig	Lx8_chr9-119003649-119003803	Lx8	L1	LINE
3.45279	1.31609	1.21495	1.08324	0.278701	0.70357	Not sig	GA-rich_chr19-58403094-58403189	GA-rich	Low_complexity	Low_complexity
3.051	1.31587	1.24258	1.05898	0.289608	0.714227	Not sig	B4_chr19-59826232-59826506	B4	B4	SINE
3.42804	1.31419	1.17785	1.11576	0.264526	0.68929	Not sig	PB1D10_chr9-120968969-120969072	PB1D10	Alu	SINE
2.54116	1.31419	1.3812	0.951482	0.34136	0.756814	Not sig	B1F2_chrX-162766195-162766322	B1F2	Alu	SINE
3.42471	1.31362	1.19419	1.10001	0.271329	0.696347	Not sig	MTE-int_chr4-152247733-152248010	MTE-int	ERVL-MaLR	LTR
2.87916	1.31261	1.38497	0.947753	0.343255	0.758813	Not sig	ORR1C2_chr16-91375074-91375534	ORR1C2	ERVL-MaLR	LTR
13.0376	1.31245	0.614681	2.13517	0.0327474	0.243415	Not sig	(CAGA)n_chr7-143739182-143739212	(CAGA)n	Simple_repeat	Simple_repeat
7.51208	1.3124	0.807119	1.62603	0.103943	0.463837	Not sig	B4A_chr19-58404699-58404994	B4A	B4	SINE
10.9853	1.31232	0.690249	1.90123	0.0572722	0.337294	Not sig	ID_B1_chr4-150869048-150869252	ID_B1	B4	SINE
12.4135	1.31143	0.625272	2.09738	0.0359602	0.259884	Not sig	MLT1E3_chr4-154005716-154005961	MLT1E3	ERVL-MaLR	LTR
86.8078	1.31123	0.24222	5.41337	6.18511e-08	4.52307e-06	Up	B1_Mur2_chr6-143188764-143188874	B1_Mur2	Alu	SINE
7.07501	1.31063	0.856882	1.52954	0.126132	0.510007	Not sig	RSINE1_chr16-90964828-90964988	RSINE1	B4	SINE
6.06066	1.31007	1.07653	1.21694	0.223627	0.647104	Not sig	MIR3_chr19-58449960-58450075	MIR3	MIR	SINE
9.38577	1.31001	0.738683	1.77344	0.0761551	0.391953	Not sig	Charlie19a_chr19-60200326-60200662	Charlie19a	hAT-Charlie	DNA
3.95876	1.30998	1.19817	1.09332	0.274252	0.69931	Not sig	CT-rich_chrX-162045510-162045552	CT-rich	Low_complexity	Low_complexity
3.56698	1.3091	1.17628	1.11291	0.265746	0.690873	Not sig	B3_chr16-91826836-91826905	B3	B2	SINE
3.32614	1.309	1.3603	0.962287	0.335905	0.7528	Not sig	B3A_chr4-145068133-145068342	B3A	B2	SINE
52.4106	1.30888	0.30791	4.25084	2.12974e-05	0.000846634	Up	(GGA)n_chr13-117025421-117025458	(GGA)n	Simple_repeat	Simple_repeat
17.6119	1.30825	0.561864	2.32841	0.0198905	0.175034	Not sig	ORR1D2_chr16-90843321-90843645	ORR1D2	ERVL-MaLR	LTR
3.41375	1.3081	1.18157	1.10709	0.268256	0.692955	Not sig	ID4__chr4-150809223-150809298	ID4_	ID	SINE
2.86253	1.3056	1.46418	0.891697	0.372555	0.779471	Not sig	MLT1A_chr19-60546290-60546622	MLT1A	ERVL-MaLR	LTR
3.20148	1.3055	1.30534	1.00012	0.317254	0.741469	Not sig	ID_B1_chr9-114445655-114445791	ID_B1	B4	SINE
10.3698	1.30542	0.702517	1.8582	0.0631399	0.353434	Not sig	MLT1B_chr4-154548515-154548602	MLT1B	ERVL-MaLR	LTR
4.88996	1.305	0.980168	1.33141	0.183055	0.597705	Not sig	RLTR10D2_chr4-156161604-156161930	RLTR10D2	ERVK	LTR
10.6001	1.30456	0.682005	1.91282	0.0557705	0.332459	Not sig	MTD_chr15-102345788-102345959	MTD	ERVL-MaLR	LTR
5.1028	1.30385	0.993924	1.31182	0.189579	0.607854	Not sig	B4A_chr9-119003023-119003195	B4A	B4	SINE
3.15853	1.30237	1.28759	1.01148	0.311786	0.73766	Not sig	ID_B1_chr4-149503730-149503947	ID_B1	B4	SINE
17.2125	1.30211	0.557754	2.33456	0.0195665	0.173686	Not sig	B4A_chr9-118936969-118937232	B4A	B4	SINE
3.25332	1.30167	1.38358	0.940797	0.346809	0.761218	Not sig	L1Md_F2_chr6-146974716-146975203	L1Md_F2	L1	LINE
5.05141	1.30136	1.02302	1.27208	0.203344	0.623609	Not sig	ERVB7_2B-LTR_MM_chr14-124439412-124439776	ERVB7_2B-LTR_MM	ERVK	LTR
8.47857	1.30054	0.793919	1.63812	0.101396	0.457773	Not sig	ID_B1_chr9-113858119-113858249	ID_B1	B4	SINE
13.1237	1.29918	0.616781	2.10639	0.0351708	0.256103	Not sig	MER2_chr6-146966048-146966192	MER2	TcMar-Tigger	DNA
8.8583	1.29911	0.767273	1.69314	0.0904279	0.430571	Not sig	MIRc_chr16-92703759-92703845	MIRc	MIR	SINE
3.70318	1.29741	1.11953	1.15888	0.246503	0.669101	Not sig	PB1D10_chr19-55431931-55432037	PB1D10	Alu	SINE
2.04553	1.29713	1.65578	0.783393	0.433396	0.816727	Not sig	PB1D10_chr15-102317786-102317889	PB1D10	Alu	SINE
9.23152	1.29673	0.721363	1.79761	0.0722393	0.38186	Not sig	Lx9_chr6-145766416-145766635	Lx9	L1	LINE
7.20685	1.29424	0.826293	1.56632	0.117273	0.494752	Not sig	B2_Mm1t_chr16-94624445-94624624	B2_Mm1t	B2	SINE
5.73786	1.29381	0.925143	1.3985	0.161963	0.569953	Not sig	(CA)n_chr16-92717059-92717111	(CA)n	Simple_repeat	Simple_repeat
2.67013	1.29323	1.40207	0.922372	0.356334	0.769231	Not sig	L1Md_F3_chr13-118993998-118994984	L1Md_F3	L1	LINE
3.20335	1.29297	1.30853	0.988105	0.323101	0.745975	Not sig	Charlie4z_chr13-116865235-116865343	Charlie4z	hAT-Charlie	DNA
3.33278	1.29224	1.27055	1.01708	0.309116	0.734648	Not sig	ORR1D1_chr1-194647989-194648180	ORR1D1	ERVL-MaLR	LTR
10.4569	1.29213	0.683962	1.88918	0.0588675	0.342268	Not sig	(TG)n_chr4-150067773-150067819	(TG)n	Simple_repeat	Simple_repeat
2.97672	1.29008	1.32183	0.975978	0.329076	0.748945	Not sig	PB1D9_chr15-102439945-102440031	PB1D9	Alu	SINE
53.1036	1.28976	0.318361	4.05124	5.09467e-05	0.00175933	Up	(CACCAT)n_chr19-58238079-58238116	(CACCAT)n	Simple_repeat	Simple_repeat
9.51492	1.2896	0.799909	1.61218	0.106922	0.471418	Not sig	(CAGCC)n_chr4-155148497-155148522	(CAGCC)n	Simple_repeat	Simple_repeat
20.721	1.28948	0.483	2.66972	0.00759135	0.0921796	Not sig	(TC)n_chr19-58450254-58450299	(TC)n	Simple_repeat	Simple_repeat
21.6781	1.28893	0.501175	2.57182	0.0101164	0.110447	Not sig	MTD_chr9-122198287-122198651	MTD	ERVL-MaLR	LTR
2.47785	1.28861	1.43176	0.900015	0.368112	0.776539	Not sig	ID_B1_chr4-147908446-147908517	ID_B1	B4	SINE
3.71032	1.288	1.13984	1.12998	0.258485	0.682528	Not sig	(TG)n_chr9-118510212-118510238	(TG)n	Simple_repeat	Simple_repeat
2.36258	1.28619	1.48073	0.868623	0.385054	0.786029	Not sig	ID_B1_chr7-144946505-144946602	ID_B1	B4	SINE
6.49044	1.28562	0.898922	1.43018	0.152665	0.557797	Not sig	B4_chr19-60758880-60759067	B4	B4	SINE
2.03086	1.2848	1.65585	0.775914	0.4378	0.819987	Not sig	MTB_chr19-58276742-58277120	MTB	ERVL-MaLR	LTR
12.4678	1.28477	0.632829	2.0302	0.0423367	0.286469	Not sig	L1MD1_chr9-118937607-118937788	L1MD1	L1	LINE
5.48979	1.28444	0.949628	1.35258	0.176191	0.590108	Not sig	IMPB_01_chrX-162104442-162104645	IMPB_01	Satellite	Satellite
8.40034	1.28338	0.755577	1.69855	0.0894042	0.427932	Not sig	(CACCC)n_chr19-59905920-59905942	(CACCC)n	Simple_repeat	Simple_repeat
4.96617	1.28327	1.01058	1.26984	0.204141	0.623688	Not sig	(CAGAGA)n_chr16-90909408-90909525	(CAGAGA)n	Simple_repeat	Simple_repeat
3.15529	1.28321	1.26692	1.01286	0.311128	0.736835	Not sig	Lx3C_chr9-117946725-117947457	Lx3C	L1	LINE
62.3548	1.28234	0.284585	4.50599	6.60635e-06	0.000311523	Up	PB1D10_chr4-150864577-150864663	PB1D10	Alu	SINE
3.21057	1.28226	1.44235	0.889005	0.374	0.780225	Not sig	(TCCC)n_chr6-146912303-146912346	(TCCC)n	Simple_repeat	Simple_repeat
10.5711	1.28148	0.690683	1.85539	0.0635408	0.354517	Not sig	B1_Mur3_chr4-152197345-152197484	B1_Mur3	Alu	SINE
4.85813	1.2813	0.997586	1.2844	0.199002	0.617816	Not sig	Lx3_Mus_chr4-147764786-147766735	Lx3_Mus	L1	LINE
2.5478	1.28092	1.45244	0.881909	0.377826	0.782243	Not sig	MLT1G3_chr16-91587628-91588137	MLT1G3	ERVL-MaLR	LTR
3.84174	1.2808	1.1812	1.08433	0.278219	0.702872	Not sig	B1_Mur2_chr9-113844247-113844374	B1_Mur2	Alu	SINE
5.28368	1.2807	1.08605	1.17923	0.238307	0.661562	Not sig	ID_B1_chr4-155574752-155574893	ID_B1	B4	SINE
9.37673	1.27955	0.72631	1.76171	0.0781179	0.396387	Not sig	MER5B_chr9-122179168-122179262	MER5B	hAT-Charlie	DNA
10.5245	1.27882	0.706472	1.81016	0.0702715	0.375523	Not sig	B1_Mm_chr19-60566860-60566961	B1_Mm	Alu	SINE
2.85439	1.27876	1.30576	0.979323	0.32742	0.748086	Not sig	RSINE1_chr16-91396451-91396587	RSINE1	B4	SINE
2.02754	1.27726	1.62364	0.786664	0.431478	0.815883	Not sig	L1ME2_chr9-121310951-121311140	L1ME2	L1	LINE
8.58842	1.27642	0.795678	1.60419	0.108673	0.476316	Not sig	PB1D10_chr16-93805077-93805137	PB1D10	Alu	SINE
5.2028	1.27615	1.06121	1.20255	0.229152	0.652982	Not sig	B3A_chr4-148523283-148523480	B3A	B2	SINE
8.67922	1.27506	0.784012	1.62632	0.103881	0.463784	Not sig	GA-rich_chr7-143639661-143639842	GA-rich	Low_complexity	Low_complexity
3.29328	1.27441	1.38383	0.920928	0.357088	0.769731	Not sig	RSINE1_chr16-90873134-90873272	RSINE1	B4	SINE
6.79756	1.27224	0.905033	1.40574	0.159801	0.566428	Not sig	MIRb_chr4-154397081-154397211	MIRb	MIR	SINE
4.43814	1.27133	1.10217	1.15348	0.248714	0.671104	Not sig	(CAAA)n_chr7-144502531-144502558	(CAAA)n	Simple_repeat	Simple_repeat
2.1747	1.27118	1.67994	0.756685	0.449238	0.826557	Not sig	(GGA)n_chr16-94299533-94299976	(GGA)n	Simple_repeat	Simple_repeat
5.50698	1.27117	0.937405	1.35605	0.175083	0.589214	Not sig	B1_Mur3_chr4-150504996-150505061	B1_Mur3	Alu	SINE
6.49766	1.27101	0.874945	1.45268	0.146314	0.548142	Not sig	B3_chr19-57385574-57385747	B3	B2	SINE
3.4647	1.27073	1.21882	1.04259	0.297136	0.723142	Not sig	B2_Mm2_chr4-149059329-149059485	B2_Mm2	B2	SINE
19.9637	1.27031	0.500125	2.53999	0.0110857	0.118435	Not sig	B4_chr4-152247067-152247160	B4	B4	SINE
6.64424	1.26988	0.842138	1.50792	0.131575	0.521987	Not sig	T-rich_chr4-149240021-149240081	T-rich	Low_complexity	Low_complexity
7.08026	1.26963	0.878446	1.44532	0.148369	0.552012	Not sig	MTEa_chr4-147944100-147944449	MTEa	ERVL-MaLR	LTR
21.6823	1.26928	0.472466	2.68649	0.00722065	0.0891177	Not sig	(CA)n_chr19-58318325-58318499	(CA)n	Simple_repeat	Simple_repeat
2.34887	1.26763	1.41197	0.897776	0.369305	0.777236	Not sig	RLTR42-int_chrX-163033724-163034244	RLTR42-int	ERVK	LTR
4.04789	1.26757	1.23843	1.02352	0.30606	0.732092	Not sig	ID4_chr4-148511424-148511483	ID4	ID	SINE
3.86757	1.26706	1.19845	1.05725	0.290395	0.71488	Not sig	(TG)n_chr4-150049684-150049729	(TG)n	Simple_repeat	Simple_repeat
4153.98	1.26654	0.508721	2.48965	0.012787	0.131023	Not sig	LSU-rRNA_Hsa_chr6-145932748-145933027	LSU-rRNA_Hsa	rRNA	rRNA
4.96184	1.26639	0.986294	1.28399	0.199147	0.617816	Not sig	(CA)n_chr4-148081813-148081856	(CA)n	Simple_repeat	Simple_repeat
2.20278	1.26559	1.60793	0.787089	0.43123	0.815798	Not sig	B1_Mus1_chr5-151179086-151179221	B1_Mus1	Alu	SINE
3.51089	1.26541	1.15576	1.09487	0.273575	0.69857	Not sig	RSINE1_chr16-91930004-91930143	RSINE1	B4	SINE
9.63474	1.26528	0.707528	1.78832	0.0737247	0.385245	Not sig	Lx5_chr6-149434902-149436002	Lx5	L1	LINE
61.3402	1.26486	0.285565	4.42934	9.45198e-06	0.00042379	Up	(CA)n_chr19-58318757-58319221	(CA)n	Simple_repeat	Simple_repeat
12.6606	1.26432	0.628677	2.01108	0.0443174	0.293123	Not sig	B3A_chr4-151850422-151850616	B3A	B2	SINE
6.83615	1.2642	0.841828	1.50173	0.133166	0.523378	Not sig	B3_chr4-149221350-149221563	B3	B2	SINE
7.97008	1.26331	0.780808	1.61795	0.105673	0.468169	Not sig	ORR1A2_chr16-96091037-96091359	ORR1A2	ERVL-MaLR	LTR
8.19326	1.26281	0.805189	1.56834	0.116802	0.494359	Not sig	PB1D9_chr4-152255087-152255189	PB1D9	Alu	SINE
3.78985	1.26273	1.13608	1.11148	0.266361	0.691044	Not sig	B4_chr9-122207447-122207692	B4	B4	SINE
142.984	1.25988	0.200433	6.28579	3.26185e-10	3.40503e-08	Up	(TGG)n_chr7-141434204-141434293	(TGG)n	Simple_repeat	Simple_repeat
9.65301	1.2596	0.731468	1.72202	0.0850654	0.415305	Not sig	PB1_chr9-114534133-114534240	PB1	Alu	SINE
4.4773	1.25949	1.06398	1.18375	0.236513	0.65872	Not sig	Tigger5_chr16-92747768-92747918	Tigger5	TcMar-Tigger	DNA
2.69164	1.25932	1.49602	0.841782	0.39991	0.795573	Not sig	B1_Mur3_chr16-87476445-87476592	B1_Mur3	Alu	SINE
2.98394	1.2588	1.26271	0.996904	0.318811	0.743041	Not sig	ORR1B1_chr9-119917802-119918153	ORR1B1	ERVL-MaLR	LTR
9.44529	1.25877	0.721658	1.74428	0.0811106	0.40585	Not sig	B1_Mus1_chr4-143148839-143148955	B1_Mus1	Alu	SINE
4.59909	1.25865	1.08974	1.15499	0.248093	0.67102	Not sig	MTB_Mm_chr19-58343671-58344083	MTB_Mm	ERVL-MaLR	LTR
14.4692	1.25822	0.647689	1.94262	0.0520618	0.319198	Not sig	RLTR20A4_chr7-141096446-141096526	RLTR20A4	ERVK	LTR
6.50197	1.2582	0.885634	1.42068	0.155411	0.560254	Not sig	RSINE1_chr4-152242733-152242804	RSINE1	B4	SINE
2.33458	1.25818	1.41303	0.89041	0.373246	0.779864	Not sig	ID4_chr19-55862434-55862501	ID4	ID	SINE
3.62898	1.25814	1.16563	1.07936	0.280426	0.705036	Not sig	(TG)n_chr16-92804963-92805013	(TG)n	Simple_repeat	Simple_repeat
5.91729	1.25666	0.907914	1.38412	0.166322	0.577126	Not sig	ORR1A3_chr9-117909662-117909827	ORR1A3	ERVL-MaLR	LTR
5.09662	1.25644	1.1047	1.13736	0.255389	0.678449	Not sig	ID4_chr4-154541410-154541478	ID4	ID	SINE
4.61957	1.25549	1.01908	1.23198	0.217958	0.63947	Not sig	(CA)n_chr7-145258177-145258197	(CA)n	Simple_repeat	Simple_repeat
4.79157	1.25546	1.05702	1.18774	0.234937	0.657273	Not sig	L1M2_chr6-145791294-145791377	L1M2	L1	LINE
4.92993	1.25524	0.996489	1.25966	0.207792	0.627852	Not sig	MIRb_chr9-121475633-121475802	MIRb	MIR	SINE
14.3411	1.25512	0.577735	2.17248	0.0298194	0.228244	Not sig	PB1D9_chr4-155556027-155556115	PB1D9	Alu	SINE
5.42174	1.25348	0.962239	1.30267	0.192687	0.611838	Not sig	L2_chr14-124600756-124601265	L2	L2	LINE
3.13775	1.25319	1.33864	0.936169	0.349186	0.763768	Not sig	RLTRETN_Mm_chrX-164284916-164285251	RLTRETN_Mm	ERVK	LTR
54.4284	1.25303	0.305082	4.10718	4.00513e-05	0.00142631	Up	(T)n_chr16-92083690-92083718	(T)n	Simple_repeat	Simple_repeat
5.97299	1.2528	0.988611	1.26724	0.205071	0.625178	Not sig	PB1D10_chr6-140503291-140503414	PB1D10	Alu	SINE
3.23757	1.25201	1.321	0.947772	0.343245	0.758813	Not sig	PB1D11_chr4-155541048-155541099	PB1D11	Alu	SINE
8.41245	1.25017	0.800863	1.56103	0.118517	0.496102	Not sig	L1_Mus2_chr4-155517632-155517756	L1_Mus2	L1	LINE
6.72328	1.24906	0.859488	1.45327	0.14615	0.548089	Not sig	PB1D10_chr6-146945584-146945699	PB1D10	Alu	SINE
6.38483	1.24906	0.879532	1.42014	0.155567	0.560254	Not sig	B1F_chr13-117014723-117014831	B1F	Alu	SINE
3.14336	1.24798	1.31021	0.952501	0.340843	0.756458	Not sig	RSINE1_chr4-149283356-149283514	RSINE1	B4	SINE
2.95868	1.24597	1.26362	0.98603	0.324118	0.74646	Not sig	RSINE1_chr4-154546499-154546630	RSINE1	B4	SINE
3.3319	1.24593	1.27359	0.978275	0.327938	0.748745	Not sig	MIRb_chr9-121338172-121338324	MIRb	MIR	SINE
12.4304	1.24568	0.717814	1.73538	0.082674	0.410072	Not sig	B4A_chr6-145797845-145798059	B4A	B4	SINE
2.31697	1.24546	1.40145	0.888698	0.374166	0.780344	Not sig	B1_Mus1_chr9-123594647-123594790	B1_Mus1	Alu	SINE
2.28889	1.24533	1.45197	0.857684	0.391067	0.790516	Not sig	Arthur1B_chr19-55568567-55568870	Arthur1B	hAT-Tip100	DNA
5.75358	1.24468	0.903289	1.37794	0.168221	0.580183	Not sig	MIRc_chr4-149555930-149556089	MIRc	MIR	SINE
7.1146	1.24443	0.824514	1.50929	0.131225	0.521038	Not sig	B1_Mus2_chr13-116858270-116858415	B1_Mus2	Alu	SINE
2.28556	1.24404	1.49719	0.830912	0.406023	0.798468	Not sig	(TTTG)n_chr15-102245364-102245388	(TTTG)n	Simple_repeat	Simple_repeat
2.92728	1.24291	1.3051	0.952353	0.340918	0.756458	Not sig	B4_chr7-141875748-141876018	B4	B4	SINE
2.13848	1.24258	1.66465	0.746451	0.455395	0.829476	Not sig	B3_chr16-96183500-96183676	B3	B2	SINE
204.67	1.2425	0.184113	6.74857	1.49308e-11	1.83944e-09	Up	(CA)n_chr16-92806638-92806804	(CA)n	Simple_repeat	Simple_repeat
17.8224	1.24226	0.539313	2.3034	0.0212562	0.182358	Not sig	L2_chr9-118949588-118949653	L2	L2	LINE
4.075	1.24219	1.08179	1.14828	0.250855	0.673758	Not sig	MTEb_chr19-60908512-60908775	MTEb	ERVL-MaLR	LTR
7.74535	1.24192	0.807723	1.53756	0.124157	0.506639	Not sig	LFSINE_Vert_chr9-122242092-122242160	LFSINE_Vert	tRNA	SINE
2.62306	1.24149	1.43968	0.86234	0.3885	0.788514	Not sig	L2_chr4-155068334-155068424	L2	L2	LINE
3.30382	1.24109	1.22157	1.01597	0.309641	0.735002	Not sig	ORR1D2_chr16-91789765-91790103	ORR1D2	ERVL-MaLR	LTR
12.2774	1.24079	0.629518	1.97102	0.0487216	0.309257	Not sig	B4A_chr19-57385888-57386154	B4A	B4	SINE
5.63889	1.24046	0.932928	1.32964	0.183636	0.598907	Not sig	MIRb_chr6-145762448-145762542	MIRb	MIR	SINE
12.6916	1.23987	0.653229	1.89806	0.0576878	0.338866	Not sig	MTE2b_chr9-117896540-117896906	MTE2b	ERVL-MaLR	LTR
2.65878	1.23978	1.36907	0.905569	0.365164	0.775166	Not sig	ID4_chr4-151964045-151964096	ID4	ID	SINE
7.97247	1.23953	0.79691	1.55542	0.119847	0.498601	Not sig	RSINE1_chrX-163946528-163946680	RSINE1	B4	SINE
2.33076	1.23925	1.46902	0.843591	0.398898	0.795137	Not sig	B3_chr11-121245918-121246087	B3	B2	SINE
5.59262	1.23922	0.959181	1.29196	0.196372	0.616171	Not sig	B3A_chr4-151946522-151946700	B3A	B2	SINE
8.84738	1.23827	0.744258	1.66376	0.0961602	0.444933	Not sig	C-rich_chr7-145265093-145265136	C-rich	Low_complexity	Low_complexity
6.11923	1.23803	0.965782	1.2819	0.199879	0.618823	Not sig	RSINE1_chr4-149013237-149013368	RSINE1	B4	SINE
5.44981	1.23738	0.967887	1.27844	0.201095	0.619782	Not sig	RSINE1_chr9-114379306-114379467	RSINE1	B4	SINE
3.13392	1.23706	1.3098	0.944467	0.344931	0.759933	Not sig	B1_Mus1_chr15-102310168-102310306	B1_Mus1	Alu	SINE
2.48399	1.23687	1.48282	0.834132	0.404207	0.7978	Not sig	MTC_chr9-122969495-122969880	MTC	ERVL-MaLR	LTR
20.4031	1.23675	0.489759	2.52522	0.0115625	0.122098	Not sig	ID_B1_chr16-92810589-92810783	ID_B1	B4	SINE
3.57946	1.23587	1.15002	1.07465	0.282531	0.706456	Not sig	B1_Mur2_chr9-114439595-114439721	B1_Mur2	Alu	SINE
2.96582	1.23537	1.2487	0.989325	0.322504	0.745475	Not sig	(TC)n_chr19-60891007-60891165	(TC)n	Simple_repeat	Simple_repeat
20.6888	1.2351	0.490006	2.52059	0.0117159	0.123018	Not sig	MLTR11B_chr4-152214644-152214918	MLTR11B	ERVK	LTR
50.8209	1.23494	0.348546	3.54312	0.000395425	0.00965613	Up	Lx_chr19-59303418-59303831	Lx	L1	LINE
4.64822	1.23454	1.08234	1.14062	0.254027	0.675715	Not sig	(TCC)n_chr6-143831168-143831251	(TCC)n	Simple_repeat	Simple_repeat
[truncated: 11,677 more rows]

## Sheet: Table8. IP-Mass spectrometry
Supplementary Table 10. IP-Mass spectrometry data
Protein IDs	Majority protein IDs	Protein names	Gene names	Intensity	Intensity IP_IDR3 mutation_cytoplasm	Intensity IP_IDR3 mutation_nucleoplasm	Intensity IP_IDR3 mutation_chromatin	Intensity IP_Vector_cytoplasm	Intensity IP_Vector_nucleoplasm	Intensity IP_Vector_chromatin	Intensity IP_WT_cytoplasm	Intensity IP_WT_nucleoplasm	Intensity IP_WT_chromatin
A2NJV5;A0A0A0MRZ7;A0A075B6S2;A0A075B6S6;A0A075B6P5;A0A087WW87;P06310;P01615;P01614;A0A0C4DH68	A2NJV5;A0A0A0MRZ7;A0A075B6S2;A0A075B6S6;A0A075B6P5;A0A087WW87;P06310;P01615;P01614	Ig kappa chain V-II region RPMI 6410;Ig kappa chain V-II region FR;Ig kappa chain V-II region Cum	IGKV A18;IGKV2D-26;IGKV2D-29;IGKV2D-30;IGKV2D-28;IGKV2-40	770820000000	76634000000	71466000	105100000000	138690000000	131140000000	74104000000	89451000000	75802000000	79826000000
P35527;CON__P35527;CON__Q99456;Q99456	P35527;CON__P35527	Keratin, type I cytoskeletal 9	KRT9	122320000000	9703600000	0	6478800000	26264000000	14052000000	3234000000	8016200000	47857000000	6709700000
P04264;CON__P04264	P04264;CON__P04264	Keratin, type II cytoskeletal 1	KRT1	175040000000	34097000000	6481100	10317000000	31534000000	23245000000	7174500000	12812000000	46977000000	8878100000
P68133;P68032;P62736;P63267	P68133;P68032;P62736;P63267	Actin, alpha skeletal muscle;Actin, alpha cardiac muscle 1;Actin, aortic smooth muscle;Actin, gamma-enteric smooth muscle	ACTA1;ACTC1;ACTA2;ACTG2	75425000000	18850000000	0	1603100000	14538000000	7658700000	5017000000	17037000000	8729300000	1993000000
P06753	P06753	Tropomyosin alpha-3 chain	TPM3	25875000000	5748300000	0	205800000	470610000	4943600000	7534300000	385640000	6157700000	429290000
P62805	P62805	Histone H4	HIST1H4A	23541000000	6514400000	0	24340000	7886900000	494770000	355570000	3974400000	4266500000	23865000
Q99879;Q99877;Q93079;Q5QNW6;P62807;P58876;P57053;O60814	Q99879;Q99877;Q93079;Q5QNW6;P62807;P58876;P57053;O60814	Histone H2B type 1-M;Histone H2B type 1-N;Histone H2B type 1-H;Histone H2B type 2-F;Histone H2B type 1-C/E/F/G/I;Histone H2B type 1-D;Histone H2B type F-S;Histone H2B type 1-K	HIST1H2BM;HIST1H2BN;HIST1H2BH;HIST2H2BF;HIST1H2BC;HIST1H2BD;H2BFS;HIST1H2BK	21084000000	6730200000	0	22881000	5371800000	565310000	627060000	3866900000	3875600000	24362000
P07951	P07951	Tropomyosin beta chain	TPM2	15297000000	3454800000	0	97057000	0	3312100000	4230300000	279450000	3549100000	373920000
P09493	P09493	Tropomyosin alpha-1 chain	TPM1	14085000000	4130200000	0	153280000	0	1776100000	3966400000	241120000	3514800000	302930000
P02452	P02452	Collagen alpha-1(I) chain	COL1A1	11372000000	1250700000	0	112940000	0	3154100000	3573800000	0	3038400000	242510000
Q99878;Q96KK5;Q9BTM1;Q16777;Q93077;Q7L7L0;Q6FI13;P20671;P0C0S8;P04908;Q96QV6;P16104;REV__Q8NB25	Q99878;Q96KK5;Q9BTM1;Q16777;Q93077;Q7L7L0;Q6FI13;P20671;P0C0S8;P04908;Q96QV6;P16104	Histone H2A type 1-J;Histone H2A type 1-H;Histone H2A.J;Histone H2A type 2-C;Histone H2A type 1-C;Histone H2A type 3;Histone H2A type 2-A;Histone H2A type 1-D;Histone H2A type 1;Histone H2A type 1-B/E;Histone H2A type 1-A;Histone H2AX	HIST1H2AJ;HIST1H2AH;H2AFJ;HIST2H2AC;HIST1H2AC;HIST3H2A;HIST2H2AA3;HIST1H2AD;HIST1H2AG;HIST1H2AB;HIST1H2AA;H2AFX	19812000000	6783200000	0	16635000	5824800000	615290000	606050000	2955600000	2951200000	58917000
P12883;Q494R4	P12883	Myosin-7	MYH7	12250000000	2441800000	0	8692300	0	2907800000	3734700000	186680000	2900400000	69805000
Q86TI4	Q86TI4	WD repeat-containing protein 86	WDR86	3975400000	0	0	0	0	397650000	49652000	0	2545300000	982760000
P12882	P12882	Myosin-1	MYH1	9481300000	2103800000	0	6407100	0	2139000000	2530200000	110980000	2455400000	135490000
P08123	P08123	Collagen alpha-2(I) chain	COL1A2	8918900000	1309900000	0	130240000	0	2797900000	2317400000	0	2142200000	221300000
Q5TEC6	Q5TEC6	Histone H3	HIST2H3PS2	6359000000	1805700000	0	0	1195000000	265170000	103930000	1082800000	1891700000	14749000
P08238;Q58FF7	P08238	Heat shock protein HSP 90-beta	HSP90AB1	37943000000	16750000000	0	39433000	9987500000	116520000	336310000	8631900000	1571800000	509280000
P16403;Q02539;P22492	P16403	Histone H1.2	HIST1H1C	9335500000	2676600000	0	0	2452100000	366270000	119450000	2152900000	1568200000	0
P63261;P60709;Q6S8J3;A5A3E0;P0CG38;Q562R1;P0CG39;Q9BYX7	P63261;P60709	Actin, cytoplasmic 2;Actin, cytoplasmic 2, N-terminally processed;Actin, cytoplasmic 1;Actin, cytoplasmic 1, N-terminally processed	ACTG1;ACTB	35385000000	13095000000	0	1327600000	9978400000	519520000	1232600000	7003300000	1558900000	669430000
Q96A32	Q96A32	Myosin regulatory light chain 2, skeletal muscle isoform	MYLPF	7187700000	1611200000	0	43971000	0	1617600000	1703200000	594400000	1512700000	104600000
Q5VTE0;P68104	Q5VTE0;P68104	Putative elongation factor 1-alpha-like 3;Elongation factor 1-alpha 1	EEF1A1P5;EEF1A1	26704000000	10990000000	0	43628000	6569300000	167460000	115790000	7068500000	1324200000	424690000
P45378	P45378	Troponin T, fast skeletal muscle	TNNT3	4072300000	540220000	0	15522000	0	1210200000	887650000	75723000	1307100000	35932000
P07437;A6NNZ2;CON__ENSEMBL:ENSBTAP00000025008;Q9H4B7	P07437	Tubulin beta chain	TUBB	28382000000	12232000000	0	0	9078300000	156460000	194040000	5162900000	1208300000	350030000
P69905	P69905	Hemoglobin subunit alpha	HBA1	4010500000	806240000	0	0	0	866790000	984550000	54682000	1206400000	91890000
P0DMV9;P0DMV8	P0DMV9;P0DMV8	Heat shock 70 kDa protein 1B;Heat shock 70 kDa protein 1A	HSPA1B;HSPA1A	14751000000	7395300000	0	6434000	3091000000	44210000	127240000	2652000000	1127600000	307260000
Q01804	Q01804	OTU domain-containing protein 4	OTUD4	13989000000	9110300000	0	0	0	0	182830000	1308200000	1088900000	2298500000
P11142;P54652	P11142	Heat shock cognate 71 kDa protein	HSPA8	12412000000	6066000000	0	0	2411500000	7604900	111930000	2649500000	1061800000	103860000
Q9BQE3;P68363;Q71U36;P0DPH8;P0DPH7;P68366;Q6PEY2;Q9NY65;Q9H853	Q9BQE3;P68363;Q71U36;P0DPH8;P0DPH7;P68366;Q6PEY2;Q9NY65	Tubulin alpha-1C chain;Tubulin alpha-1B chain;Tubulin alpha-1A chain;Tubulin alpha-4A chain;Tubulin alpha-3E chain;Tubulin alpha-8 chain	TUBA1C;TUBA1B;TUBA1A;TUBA4A;TUBA3E;TUBA8	24656000000	11263000000	0	22821000	6332800000	89758000	362610000	5270700000	1054400000	260650000
P06702	P06702	Protein S100-A9	S100A9	3858800000	551850000	0	54484000	0	1132200000	1080500000	0	985700000	54162000
P13639	P13639	Elongation factor 2	EEF2	11266000000	5440800000	0	0	2299400000	0	75791000	2379500000	927090000	143650000
P10916;Q9BUA6	P10916	Myosin regulatory light chain 2, ventricular/cardiac muscle isoform	MYL2	3130800000	955350000	0	0	0	182390000	644550000	410970000	917030000	20552000
P06732	P06732	Creatine kinase M-type;Creatine kinase M-type, N-terminally processed	CKM	3517700000	624310000	0	9685600	0	958260000	935290000	98740000	862730000	28720000
P01859;P01861;P01860	P01859;P01861;P01860	Ig gamma-2 chain C region;Ig gamma-4 chain C region;Ig gamma-3 chain C region	IGHG2;IGHG4;IGHG3	4938400000	722820000	0	914310000	751230000	0	443470000	652780000	861800000	591940000
P05976	P05976	Myosin light chain 1/3, skeletal muscle isoform	MYL1	7596800000	3501600000	0	49014000	0	868770000	931860000	1286000000	859310000	100220000
P09651;Q32P51;A0A2R8Y4L2	P09651;Q32P51;A0A2R8Y4L2	Heterogeneous nuclear ribonucleoprotein A1;Heterogeneous nuclear ribonucleoprotein A1, N-terminally processed;Heterogeneous nuclear ribonucleoprotein A1-like 2	HNRNPA1;HNRNPA1L2	5301300000	2015300000	0	0	1666100000	52087000	6278500	726190000	835350000	0
P68871;P02042;CON__Q3SX09;CON__P02070;P02100	P68871;P02042	Hemoglobin subunit beta;LVV-hemorphin-7;Spinorphin;Hemoglobin subunit delta	HBB;HBD	3483600000	825220000	0	8460200	0	594590000	1112200000	72205000	773300000	97639000
Q9Y666	Q9Y666	Solute carrier family 12 member 7	SLC12A7	1947800000	0	0	0	160430000	612270000	0	106640000	741010000	327470000
Q9UKX2	Q9UKX2	Myosin-2	MYH2	2229100000	335640000	0	0	0	535810000	602580000	0	735170000	19895000
P12277	P12277	Creatine kinase B-type	CKB	10361000000	5205200000	0	0	2561700000	9431200	28793000	1633300000	697100000	225690000
Q9H2T7	Q9H2T7	Ran-binding protein 17	RANBP17	1810800000	400330000	0	0	382350000	340080000	0	0	688090000	0
Q00839	Q00839	Heterogeneous nuclear ribonucleoprotein U	HNRNPU	3361400000	1306300000	0	0	870860000	4365500	2842100	503030000	674060000	0
P19338	P19338	Nucleolin	NCL	4481200000	1880700000	0	0	1403900000	7413600	0	553400000	635800000	0
Q8TEK3	Q8TEK3	Histone-lysine N-methyltransferase, H3 lysine-79 specific	DOT1L	1824600000	0	0	0	0	0	23669000	1187900000	613120000	0
P06748	P06748	Nucleophosmin	NPM1	7073400000	2321700000	0	3182300	2921500000	56842000	32706000	1140600000	590120000	6715600
P04075;P09972;P05062	P04075	Fructose-bisphosphate aldolase A	ALDOA	6659200000	2940000000	0	24066000	1492300000	397960000	376110000	768020000	575110000	85652000
Q8NC51	Q8NC51	Plasminogen activator inhibitor 1 RNA-binding protein	SERBP1	4252700000	1947000000	0	0	778420000	0	6991000	938860000	557410000	24011000
P07900;Q14568;Q58FG0;Q58FG1	P07900	Heat shock protein HSP 90-alpha	HSP90AA1	15201000000	6125200000	0	15183000	4609200000	19656000	90583000	3619300000	556280000	165320000
P05387	P05387	60S acidic ribosomal protein P2	RPLP2	5481700000	1936100000	0	7143600	1241600000	23430000	117120000	1217800000	555030000	383530000
P02538;CON__P02538;CON__Q8VED5	P02538;CON__P02538	Keratin, type II cytoskeletal 6A	KRT6A	2818400000	29176000	0	83877000	637770000	88606000	434080000	969820000	551330000	23766000
P61978	P61978	Heterogeneous nuclear ribonucleoprotein K	HNRNPK	4146200000	1537600000	0	0	1530700000	16550000	16967000	494770000	549650000	0
Q06830	Q06830	Peroxiredoxin-1	PRDX1	6215200000	2365900000	0	121360000	1285700000	131520000	96665000	1551300000	530440000	132250000
P08590	P08590	Myosin light chain 3	MYL3	2324600000	605790000	0	9081600	0	401820000	731950000	26451000	523180000	26276000
P22626	P22626	Heterogeneous nuclear ribonucleoproteins A2/B1	HNRNPA2B1	3224800000	1227000000	0	0	1028000000	11778000	0	475620000	482450000	0
P07910;A0A0G2JPF8;A0A0G2JNQ3;P0DMR1;O60812;B7ZW38;B2RXH8	P07910;A0A0G2JPF8;A0A0G2JNQ3;P0DMR1;O60812;B7ZW38;B2RXH8	Heterogeneous nuclear ribonucleoproteins C1/C2;Heterogeneous nuclear ribonucleoprotein C-like 4;Heterogeneous nuclear ribonucleoprotein C-like 1;Heterogeneous nuclear ribonucleoprotein C-like 3;Heterogeneous nuclear ribonucleoprotein C-like 2	HNRNPC;HNRNPCL4;HNRNPCL1;HNRNPCL3;HNRNPCL2	3287500000	1178300000	0	0	1076600000	9243000	9076600	538170000	476220000	0
P08670;P41219;Q16352;P07197;P12036	P08670	Vimentin	VIM	2731900000	875450000	0	0	652270000	262270000	346610000	194740000	391520000	9095300
P06733;P09104	P06733	Alpha-enolase	ENO1	6235600000	2864300000	0	0	1611300000	136300000	115690000	1089100000	370160000	48679000
P09874	P09874	Poly [ADP-ribose] polymerase 1	PARP1	2953000000	1177500000	0	0	899160000	0	0	520690000	355650000	0
P18124	P18124	60S ribosomal protein L7	RPL7	2280200000	1041500000	0	0	252250000	5842500	6505900	561160000	348030000	64839000
Q14103	Q14103	Heterogeneous nuclear ribonucleoprotein D0	HNRNPD	1809000000	714620000	0	0	414190000	0	34120000	299230000	346800000	0
P52272	P52272	Heterogeneous nuclear ribonucleoprotein M	HNRNPM	2239600000	825160000	0	0	773830000	55656000	0	245650000	339330000	0
P49327	P49327	Fatty acid synthase;[Acyl-carrier-protein] S-acetyltransferase;[Acyl-carrier-protein] S-malonyltransferase;3-oxoacyl-[acyl-carrier-protein] synthase;3-oxoacyl-[acyl-carrier-protein] reductase;3-hydroxyacyl-[acyl-carrier-protein] dehydratase;Enoyl-[acyl-carrier-protein] reductase;Oleoyl-[acyl-carrier-protein] hydrolase	FASN	8592300000	3608200000	0	0	1680100000	0	0	2926400000	323760000	53765000
P51991	P51991	Heterogeneous nuclear ribonucleoprotein A3	HNRNPA3	1669200000	681780000	0	0	508070000	0	0	161540000	317840000	0
P23246	P23246	Splicing factor, proline- and glutamine-rich	SFPQ	1937300000	769940000	0	0	579870000	0	0	270430000	317060000	0
P62258	P62258	14-3-3 protein epsilon	YWHAE	4110300000	1512500000	0	3667800	1410500000	23411000	62261000	762910000	308640000	26439000
P62424	P62424	60S ribosomal protein L7a	RPL7A	2254000000	1003200000	0	0	338380000	12580000	28078000	483000000	296990000	91773000
Q15113	Q15113	Procollagen C-endopeptidase enhancer 1	PCOLCE	4277700000	1418200000	0	0	837460000	162810000	0	1512700000	296370000	50096000
Q71DI3;Q16695;P68431;P84243;Q6NXT2	Q71DI3;Q16695;P68431;P84243;Q6NXT2	Histone H3.2;Histone H3.1t;Histone H3.1;Histone H3.3;Histone H3.3C	HIST2H3A;HIST3H3;HIST1H3A;H3F3A;H3F3C	1060100000	0	0	0	378110000	68738000	40049000	277230000	296010000	0
P62241	P62241	40S ribosomal protein S8	RPS8	2221900000	1064200000	0	0	536380000	0	15429000	312900000	292990000	0
P15924	P15924	Desmoplakin	DSP	610540000	59098000	0	0	136500000	33887000	0	82288000	289760000	9006100
P60842;Q14240	P60842	Eukaryotic initiation factor 4A-I	EIF4A1	4441500000	1819300000	0	0	1238800000	9673300	0	1077600000	288380000	7699200
P39019	P39019	40S ribosomal protein S19	RPS19	2231900000	899830000	0	0	482560000	22212000	28543000	449820000	282030000	66941000
P05388;Q8NHW5	P05388;Q8NHW5	60S acidic ribosomal protein P0;60S acidic ribosomal protein P0-like	RPLP0;RPLP0P6	2684400000	1381300000	0	0	483680000	14711000	48640000	382800000	271960000	101290000
P14618;P30613	P14618	Pyruvate kinase PKM	PKM	8323400000	3804000000	0	0	2832000000	118580000	89679000	1187200000	265520000	26346000
P04406;O14556	P04406	Glyceraldehyde-3-phosphate dehydrogenase	GAPDH	6799900000	3062100000	0	20259000	2037000000	184260000	160270000	1037200000	257210000	41499000
P05141;P12235;Q9H0C2	P05141;P12235	ADP/ATP translocase 2;ADP/ATP translocase 2, N-terminally processed;ADP/ATP translocase 1	SLC25A5;SLC25A4	1749300000	692750000	0	0	481170000	23869000	0	305760000	245740000	0
P13805;P45379	P13805	Troponin T, slow skeletal muscle	TNNT1	588890000	94362000	0	0	0	175360000	83189000	0	235980000	0
P26641	P26641	Elongation factor 1-gamma	EEF1G	10945000000	4520500000	0	0	3116800000	0	17834000	3052900000	232480000	4653800
P61313	P61313	60S ribosomal protein L15	RPL15	1686000000	983100000	0	0	186150000	0	10647000	201520000	232410000	72193000
Q9NP98	Q9NP98	Myozenin-1	MYOZ1	617170000	122540000	0	0	0	121150000	145490000	0	227980000	0
Q02413	Q02413	Desmoglein-1	DSG1	275840000	0	0	0	0	18736000	0	0	224420000	32682000
P05386	P05386	60S acidic ribosomal protein P1	RPLP1	1462200000	602060000	0	0	252250000	10039000	26649000	239030000	216270000	115890000
P60174	P60174	Triosephosphate isomerase	TPI1	1244600000	473480000	0	3808100	140210000	129520000	151050000	118890000	213710000	13878000
P25705	P25705	ATP synthase subunit alpha, mitochondrial	ATP5A1	1534500000	806280000	0	0	285460000	11826000	13634000	208210000	209080000	0
P48788	P48788	Troponin I, fast skeletal muscle	TNNI2	460340000	32465000	0	0	0	154470000	64457000	0	208940000	0
Q15233	Q15233	Non-POU domain-containing octamer-binding protein	NONO	1371600000	409410000	0	0	461330000	0	0	293200000	207640000	0
P11021	P11021	78 kDa glucose-regulated protein	HSPA5	8674000000	3100300000	0	0	2717000000	0	37524000	2580900000	207290000	31050000
P61247	P61247	40S ribosomal protein S3a	RPS3A	2244900000	1036600000	0	0	581400000	3101900	4936900	396190000	205020000	17617000
P62847	P62847	40S ribosomal protein S24	RPS24	1601400000	926380000	0	0	67134000	0	10770000	341640000	201410000	54062000
P02144	P02144	Myoglobin	MB	449790000	152320000	0	0	0	96324000	0	0	201150000	0
P18621	P18621	60S ribosomal protein L17	RPL17	1185000000	651770000	0	0	136710000	6096500	0	141820000	200140000	48479000
P17066;P48741	P17066;P48741	Heat shock 70 kDa protein 6;Putative heat shock 70 kDa protein 7	HSPA6;HSPA7	2721200000	1097000000	0	13493000	618410000	33597000	73836000	622720000	197120000	65079000
P08865;A0A8I5KQE6	P08865;A0A8I5KQE6	40S ribosomal protein SA	RPSA	2192100000	887350000	0	9323300	363510000	0	30003000	671480000	190640000	39807000
P35579	P35579	Myosin-9	MYH9	1811700000	545630000	0	0	515470000	12718000	106640000	440870000	190400000	0
P31943;P55795	P31943;P55795	Heterogeneous nuclear ribonucleoprotein H;Heterogeneous nuclear ribonucleoprotein H, N-terminally processed;Heterogeneous nuclear ribonucleoprotein H2	HNRNPH1;HNRNPH2	1434500000	344350000	0	0	545490000	0	0	357770000	186890000	0
P15531	P15531	Nucleoside diphosphate kinase A	NME1	3901600000	1605700000	0	0	1133100000	20848000	0	932970000	185880000	23096000
P19237	P19237	Troponin I, slow skeletal muscle	TNNI1	631440000	130630000	0	0	0	191580000	100880000	17638000	183720000	6982000
Q9Y623	Q9Y623	Myosin-4	MYH4	529620000	104110000	0	0	0	132220000	113570000	0	179720000	0
P50990	P50990	T-complex protein 1 subunit theta	CCT8	6286900000	2864000000	0	0	1652500000	0	23997000	1518500000	179530000	48348000
P62937;P0DN37;P0DN26;A0A0B4J2A2;A0A075B767;A0A075B759;Q9Y536;F5H284	P62937	Peptidyl-prolyl cis-trans isomerase A;Peptidyl-prolyl cis-trans isomerase A, N-terminally processed	PPIA	2786300000	1164700000	0	0	836440000	22842000	40221000	520110000	179040000	22881000
P67809;Q9Y2T7	P67809	Nuclease-sensitive element-binding protein 1	YBX1	1115300000	431560000	0	0	245150000	5492300	0	246090000	177680000	9302400
P36578	P36578	60S ribosomal protein L4	RPL4	1360200000	589440000	0	0	216800000	0	7152200	300870000	177360000	68545000
P00338;Q6ZMR3	P00338	L-lactate dehydrogenase A chain	LDHA	2436400000	1067500000	0	0	571760000	119790000	77856000	411070000	175920000	12520000
Q9NZT1	Q9NZT1	Calmodulin-like protein 5	CALML5	389400000	28953000	0	0	77714000	46871000	49407000	0	174070000	12385000
P63104	P63104	14-3-3 protein zeta/delta	YWHAZ	2035100000	973330000	0	0	580030000	0	23614000	285100000	173040000	0
P23396	P23396	40S ribosomal protein S3	RPS3	4750500000	2459600000	0	0	1055900000	0	0	1001100000	170900000	63021000
Q92841	Q92841	Probable ATP-dependent RNA helicase DDX17	DDX17	858060000	292130000	0	0	248880000	6654200	4936000	134990000	170460000	0
P78371	P78371	T-complex protein 1 subunit beta	CCT2	7942800000	3712800000	0	0	2397100000	11006000	6506600	1589000000	169950000	56469000
P39023;Q92901	P39023	60S ribosomal protein L3	RPL3	1740100000	1021600000	0	0	167670000	0	0	308930000	169420000	72552000
P63241;Q9GZV4;Q6IS14	P63241	Eukaryotic translation initiation factor 5A-1	EIF5A	2288900000	941840000	0	0	516760000	0	11135000	597290000	166410000	55426000
P10809	P10809	60 kDa heat shock protein, mitochondrial	HSPD1	22160000000	8032500000	0	27789000	6144800000	132580000	17390000	7639000000	165980000	0
O00571;O15523	O00571;O15523	ATP-dependent RNA helicase DDX3X;ATP-dependent RNA helicase DDX3Y	DDX3X;DDX3Y	1715400000	676890000	0	0	470050000	0	0	400520000	165700000	2284000
P15880	P15880	40S ribosomal protein S2	RPS2	2012800000	1105900000	0	0	397750000	0	0	310320000	165130000	33625000
P68371;Q3ZCM7	P68371	Tubulin beta-4B chain	TUBB4B	3157900000	1402400000	0	0	739430000	18079000	36114000	754190000	164920000	42777000
P06576	P06576	ATP synthase subunit beta, mitochondrial	ATP5B	2816500000	1312400000	0	0	907210000	7016000	16155000	412910000	160750000	0
P02511	P02511	Alpha-crystallin B chain	CRYAB	552690000	150990000	0	0	0	109650000	115690000	16848000	159510000	0
P40227;Q92526	P40227	T-complex protein 1 subunit zeta	CCT6A	4554500000	1948400000	0	0	1465400000	0	12878000	939800000	156790000	31217000
P30050	P30050	60S ribosomal protein L12	RPL12	1379500000	812960000	0	0	168230000	0	5076000	200200000	153720000	39301000
Q02878	Q02878	60S ribosomal protein L6	RPL6	1638200000	1011800000	0	0	226260000	7466400	15566000	208930000	153360000	14827000
P62753	P62753	40S ribosomal protein S6	RPS6	1401800000	693410000	0	0	386440000	8542700	0	159490000	150710000	3238700
P18077	P18077	60S ribosomal protein L35a	RPL35A	1232100000	631660000	0	0	183450000	0	5310600	223690000	146590000	41411000
O43175	O43175	D-3-phosphoglycerate dehydrogenase	PHGDH	2413300000	990420000	0	0	627130000	0	0	640350000	141920000	13531000
Q12906;Q96SI9	Q12906	Interleukin enhancer-binding factor 3	ILF3	536290000	164530000	0	0	165520000	0	0	64843000	141400000	0
P62249	P62249	40S ribosomal protein S16	RPS16	1429100000	597990000	0	0	392150000	0	15089000	264780000	141350000	17719000
P63244	P63244	Guanine nucleotide-binding protein subunit beta-2-like 1;Guanine nucleotide-binding protein subunit beta-2-like 1, N-terminally processed	GNB2L1	1496200000	708460000	0	0	335090000	0	22065000	245440000	140300000	44874000
P62263	P62263	40S ribosomal protein S14	RPS14	1065000000	519480000	0	0	64470000	23967000	0	318450000	138640000	0
O60506	O60506	Heterogeneous nuclear ribonucleoprotein Q	SYNCRIP	984700000	436320000	0	0	308690000	0	0	101880000	137810000	0
Q99623	Q99623	Prohibitin-2	PHB2	877100000	373890000	0	0	285110000	0	0	81610000	136490000	0
P62269	P62269	40S ribosomal protein S18	RPS18	1709600000	984950000	0	0	369060000	0	0	220830000	134770000	0
P48643	P48643	T-complex protein 1 subunit epsilon	CCT5	3981300000	1691700000	0	0	1142900000	0	0	1005000000	131790000	9948300
P84098	P84098	60S ribosomal protein L19	RPL19	657680000	337430000	0	0	132330000	0	0	44887000	130830000	12214000
P55209	P55209	Nucleosome assembly protein 1-like 1	NAP1L1	1636100000	869150000	0	0	274710000	0	0	356380000	128830000	7052200
P60866	P60866	40S ribosomal protein S20	RPS20	1166600000	321440000	0	24133000	306410000	6798000	27026000	293080000	126230000	61451000
P62826	P62826	GTP-binding nuclear protein Ran	RAN	1413900000	700470000	0	0	270920000	15366000	4363700	284230000	124820000	13711000
P61353	P61353	60S ribosomal protein L27	RPL27	990900000	456410000	0	0	173950000	0	6176200	183870000	124160000	46335000
P50914	P50914	60S ribosomal protein L14	RPL14	943280000	430140000	0	0	153730000	0	4229700	200990000	122900000	31279000
Q9NR30;Q9BQ39	Q9NR30	Nucleolar RNA helicase 2	DDX21	710380000	210520000	0	0	229780000	0	0	147210000	122870000	0
P46781	P46781	40S ribosomal protein S9	RPS9	1566800000	739750000	0	0	367190000	0	0	332470000	122850000	4493900
P49368	P49368	T-complex protein 1 subunit gamma	CCT3	5346200000	2466600000	0	0	1421600000	0	6958300	1260200000	121680000	69244000
P46783;Q9NQ39	P46783;Q9NQ39	40S ribosomal protein S10;Putative 40S ribosomal protein S10-like	RPS10;RPS10P5	1506600000	852290000	0	0	274870000	0	0	243390000	119070000	16985000
P46778	P46778	60S ribosomal protein L21	RPL21	988190000	534590000	0	0	171670000	0	0	145970000	117980000	17975000
P04792	P04792	Heat shock protein beta-1	HSPB1	501950000	92364000	0	0	18059000	122480000	109920000	35147000	117720000	6261900
P17661	P17661	Desmin	DES	363620000	29482000	0	0	0	69861000	148570000	0	115710000	0
Q92945	Q92945	Far upstream element-binding protein 2	KHSRP	683350000	285870000	0	0	224200000	0	0	59222000	114060000	0
Q02543	Q02543	60S ribosomal protein L18a	RPL18A	703220000	394840000	0	0	39921000	0	0	128940000	112380000	27139000
Q08211	Q08211	ATP-dependent RNA helicase A	DHX9	821720000	342870000	0	0	250040000	0	0	116710000	112090000	0
P62244	P62244	40S ribosomal protein S15a	RPS15A	664590000	369940000	0	0	99191000	0	0	84079000	111380000	0
P09211	P09211	Glutathione S-transferase P	GSTP1	1940400000	1157500000	0	0	376710000	39089000	32462000	211010000	111140000	12513000
Q02045	Q02045	Myosin light chain 5	MYL5	396700000	0	0	5122800	0	119910000	81665000	70648000	110910000	8451400
P62081	P62081	40S ribosomal protein S7	RPS7	1505400000	853010000	0	0	478770000	0	5616800	52847000	110470000	4699100
P14923;P35222	P14923	Junction plakoglobin	JUP	347180000	41352000	0	0	91700000	58131000	0	46102000	109900000	0
P17987	P17987	T-complex protein 1 subunit alpha	TCP1	5196300000	1965300000	0	0	982550000	0	8727400	2108700000	107860000	23222000
P46776	P46776	60S ribosomal protein L27a	RPL27A	757010000	495600000	0	0	11103000	0	17752000	81380000	107370000	43809000
P07195	P07195	L-lactate dehydrogenase B chain	LDHB	2274900000	1098800000	0	0	621740000	0	15013000	420700000	107080000	11571000
P14866	P14866	Heterogeneous nuclear ribonucleoprotein L	HNRNPL	741960000	354940000	0	0	242390000	0	0	37949000	106690000	0
P07451	P07451	Carbonic anhydrase 3	CA3	176090000	69805000	0	0	0	0	0	0	106290000	0
P30086	P30086	Phosphatidylethanolamine-binding protein 1;Hippocampal cholinergic neurostimulating peptide	PEBP1	529260000	190340000	0	0	12618000	99710000	122720000	0	103870000	0
Q08554	Q08554	Desmocollin-1	DSC1	124820000	0	0	0	0	21303000	0	0	103520000	0
P50991	P50991	T-complex protein 1 subunit delta	CCT4	4630800000	1714200000	0	0	1567400000	0	8704800	1214300000	102870000	23311000
P63173	P63173	60S ribosomal protein L38	RPL38	298890000	116670000	0	6998000	39613000	0	5235100	17407000	102800000	10168000
P62917	P62917	60S ribosomal protein L8	RPL8	1537900000	875840000	0	0	202710000	0	8469600	334210000	98768000	17957000
Q00610;P53675	Q00610	Clathrin heavy chain 1	CLTC	745890000	411560000	0	0	208590000	0	3517300	26603000	95618000	0
P46777	P46777	60S ribosomal protein L5	RPL5	832590000	472870000	0	0	125460000	0	0	130890000	94399000	8969000
P42677;Q71UM5	P42677	40S ribosomal protein S27	RPS27	795140000	296460000	0	0	184750000	6919300	0	213270000	93749000	0
O75367;Q9P0M6	O75367;Q9P0M6	Core histone macro-H2A.1;Core histone macro-H2A.2	H2AFY;H2AFY2	389950000	112320000	0	0	149700000	8698000	3883000	21815000	93536000	0
P23528;Q9Y281	P23528	Cofilin-1	CFL1	3802100000	1448600000	0	16421000	1305300000	36916000	32766000	852100000	92397000	17565000
Q01469	Q01469	Fatty acid-binding protein, epidermal	FABP5	114020000	0	0	0	21740000	0	0	0	92279000	0
P14649	P14649	Myosin light chain 6B	MYL6B	761600000	304510000	0	0	72398000	88445000	100470000	97240000	89242000	9297700
P45880	P45880	Voltage-dependent anion-selective channel protein 2	VDAC2	476590000	184390000	0	0	159650000	0	0	43333000	89210000	0
P62899	P62899	60S ribosomal protein L31	RPL31	687370000	192160000	0	0	210350000	0	7204400	153630000	88958000	35069000
Q99832	Q99832	T-complex protein 1 subunit eta	CCT7	3816200000	1477500000	0	0	1183900000	0	2571300	1024000000	88699000	39485000
P62701;P22090;Q8TD47	P62701;P22090	40S ribosomal protein S4, X isoform;40S ribosomal protein S4, Y isoform 1	RPS4X;RPS4Y1	1342300000	569440000	0	0	291510000	0	3229900	382870000	88254000	6993900
P24534	P24534	Elongation factor 1-beta	EEF1B2	3680700000	1538400000	0	0	1390900000	11169000	31244000	598580000	83729000	26701000
P26599;O95758	P26599	Polypyrimidine tract-binding protein 1	PTBP1	976540000	469920000	0	0	349880000	0	0	73048000	83691000	0
P38646	P38646	Stress-70 protein, mitochondrial	HSPA9	11665000000	3771300000	0	0	3737700000	0	0	4072400000	83576000	0
P62277	P62277	40S ribosomal protein S13	RPS13	1514400000	709800000	0	0	395980000	0	16975000	264050000	82069000	45540000
Q9Y215	Q9Y215	Acetylcholinesterase collagenic tail peptide	COLQ	228100000	0	0	0	0	0	147110000	0	80987000	0
Q01130;Q9BRL6	Q01130	Serine/arginine-rich splicing factor 2	SRSF2	580800000	128610000	0	0	284690000	0	4287300	82375000	80839000	0
E9PAV3;Q9BZK3	E9PAV3	Nascent polypeptide-associated complex subunit alpha, muscle-specific form	NACA	827040000	398010000	0	0	113370000	0	14592000	220550000	80520000	0
P13533	P13533	Myosin-6	MYH6	338650000	63167000	0	0	0	77786000	117240000	0	80453000	0
P62280	P62280	40S ribosomal protein S11	RPS11	691010000	275960000	0	0	191760000	3008400	7562400	121300000	77971000	13448000
P26373	P26373	60S ribosomal protein L13	RPL13	1138400000	615040000	0	0	246070000	0	2646700	158780000	75651000	40192000
P83881;Q969Q0	P83881;Q969Q0	60S ribosomal protein L36a;60S ribosomal protein L36a-like	RPL36A;RPL36AL	404360000	181640000	0	0	15256000	12969000	0	97673000	74527000	22300000
P21796	P21796	Voltage-dependent anion-selective channel protein 1	VDAC1	357360000	104770000	0	0	71706000	0	14334000	92042000	74507000	0
P27635;Q96L21	P27635;Q96L21	60S ribosomal protein L10;60S ribosomal protein L10-like	RPL10;RPL10L	1026200000	659500000	0	0	157090000	0	6836700	112380000	73669000	16776000
P08708	P08708	40S ribosomal protein S17	RPS17	607390000	216160000	0	0	78078000	0	0	236270000	72223000	4672100
P0DP25;P0DP24;P0DP23;P27482	P0DP25;P0DP24;P0DP23			343090000	176280000	0	0	0	5848500	63172000	26307000	71484000	0
P43243	P43243	Matrin-3	MATR3	519400000	233820000	0	0	157050000	0	0	57504000	71032000	0
P02461;CON__P04258	P02461;CON__P04258	Collagen alpha-1(III) chain	COL3A1	267170000	0	0	0	0	79141000	108010000	0	70082000	9939000
P61604	P61604	10 kDa heat shock protein, mitochondrial	HSPE1	2348000000	757170000	0	0	789560000	6500800	6037700	718630000	70068000	0
Q13283	Q13283	Ras GTPase-activating protein-binding protein 1	G3BP1	395730000	154210000	0	0	146410000	0	0	25478000	69637000	0
Q13838;O00148	Q13838;O00148	Spliceosome RNA helicase DDX39B;ATP-dependent RNA helicase DDX39A	DDX39B;DDX39A	506340000	167220000	0	0	224640000	0	0	45568000	68910000	0
P61956;Q6EEV6;P55854	P61956;Q6EEV6;P55854	Small ubiquitin-related modifier 2;Small ubiquitin-related modifier 4;Small ubiquitin-related modifier 3	SUMO2;SUMO4;SUMO3	266630000	151200000	0	0	13567000	21759000	12244000	0	67862000	0
Q9P0Z9	Q9P0Z9	Tet methylcytosine dioxygenase 2	TET2	107370000	0	0	0	0	0	0	0	66064000	41306000
P23526	P23526	Adenosylhomocysteinase	AHCY	2231200000	1006400000	0	0	653140000	0	4892300	475630000	65493000	25659000
P00558;P07205	P00558	Phosphoglycerate kinase 1	PGK1	2211800000	1039100000	0	0	665420000	0	6114900	436060000	65085000	0
P62750	P62750	60S ribosomal protein L23a	RPL23A	674350000	339460000	0	0	116260000	0	0	140180000	64862000	13583000
Q96AG4	Q96AG4	Leucine-rich repeat-containing protein 59	LRRC59	485570000	216180000	0	0	68903000	0	4322900	131390000	64774000	0
O43707;Q9H254	O43707	Alpha-actinin-4	ACTN4	2135600000	1087100000	0	2639200	560480000	22619000	37559000	354580000	63740000	6893900
Q13185	Q13185	Chromobox protein homolog 3	CBX3	452790000	100440000	0	0	203640000	0	0	84997000	63710000	0
P11940;Q9H361;Q4VXU2;Q5JQF8;Q96DU9	P11940;Q9H361	Polyadenylate-binding protein 1;Polyadenylate-binding protein 3	PABPC1;PABPC3	448320000	177900000	0	0	165320000	0	0	45355000	59742000	0
Q4G0S7	Q4G0S7	Coiled-coil domain-containing protein 152	CCDC152	261520000	66743000	0	0	0	0	108400000	27793000	58578000	0
P29692	P29692	Elongation factor 1-delta	EEF1D	3344800000	1332000000	0	0	878410000	0	10074000	1038900000	58327000	27209000
P99999;CON__P62894	P99999	Cytochrome c	CYCS	259720000	61289000	0	0	24868000	59160000	56496000	0	57902000	0
Q9UQ80	Q9UQ80	Proliferation-associated protein 2G4	PA2G4	1191000000	723970000	0	0	284810000	0	0	103110000	57854000	21256000
Q13162	Q13162	Peroxiredoxin-4	PRDX4	4663500000	2256900000	0	0	1397400000	13278000	9310000	913810000	56963000	15874000
P35609	P35609	Alpha-actinin-2	ACTN2	202960000	0	0	0	0	54089000	92588000	0	56288000	0
P49207	P49207	60S ribosomal protein L34	RPL34	408670000	191790000	0	0	105260000	0	5040100	42514000	55698000	8371500
P01857	P01857	Ig gamma-1 chain C region	IGHG1	180300000	0	0	0	0	87844000	36960000	0	55498000	0
P62854;Q5JNZ5	P62854;Q5JNZ5	40S ribosomal protein S26;Putative 40S ribosomal protein S26-like 1	RPS26;RPS26P11	660120000	214870000	0	0	209650000	7039200	0	148370000	55292000	24894000
P38159;Q96E39;O75526;Q8IZ40;Q8N7X1	P38159;Q96E39	RNA-binding motif protein, X chromosome;RNA-binding motif protein, X chromosome, N-terminally processed;RNA binding motif protein, X-linked-like-1	RBMX;RBMXL1	599140000	310730000	0	0	216390000	0	0	16858000	55170000	0
P05109	P05109	Protein S100-A8;Protein S100-A8, N-terminally processed	S100A8	191120000	19008000	0	10993000	0	64452000	41615000	0	55047000	0
P56385	P56385	ATP synthase subunit e, mitochondrial	ATP5I	202100000	48272000	0	0	26235000	45715000	27530000	0	54349000	0
P62266	P62266	40S ribosomal protein S23	RPS23	922530000	347550000	0	0	278950000	0	0	203100000	53438000	39490000
P01834	P01834	Ig kappa chain C region	IGKC	209430000	47259000	0	0	0	42039000	67205000	0	52931000	0
P23284	P23284	Peptidyl-prolyl cis-trans isomerase B	PPIB	1198400000	556210000	0	0	292840000	31264000	0	265570000	52514000	0
P05204;Q15651	P05204;Q15651	Non-histone chromosomal protein HMG-17;High mobility group nucleosome-binding domain-containing protein 3	HMGN2;HMGN3	264600000	96696000	0	0	72974000	0	0	42567000	52368000	0
P26678	P26678	Cardiac phospholamban	PLN	91152000	0	0	0	0	0	39486000	0	51666000	0
Q6IMN6	Q6IMN6	Caprin-2	CAPRIN2	120000000	68601000	0	0	0	0	0	0	51403000	0
P47813;O14602	P47813;O14602	Eukaryotic translation initiation factor 1A, X-chromosomal;Eukaryotic translation initiation factor 1A, Y-chromosomal	EIF1AX;EIF1AY	335910000	150980000	0	0	26589000	0	0	101190000	51142000	6013100
Q14974	Q14974	Importin subunit beta-1	KPNB1	1057000000	630670000	0	0	243720000	0	0	128320000	50905000	3343200
Q96HC4	Q96HC4	PDZ and LIM domain protein 5	PDLIM5	154130000	37556000	0	0	0	46065000	19763000	0	50749000	0
P07814	P07814	Bifunctional glutamate/proline--tRNA ligase;Glutamate--tRNA ligase;Proline--tRNA ligase	EPRS	1437400000	684490000	0	0	327020000	0	0	371140000	50297000	4414400
P61254;Q9UNX3	P61254;Q9UNX3	60S ribosomal protein L26;60S ribosomal protein L26-like 1	RPL26;RPL26L1	534660000	202600000	0	0	72920000	0	0	204340000	49969000	4831300
P62888	P62888	60S ribosomal protein L30	RPL30	202870000	85648000	0	0	19518000	0	0	30222000	49805000	17676000
P12956	P12956	X-ray repair cross-complementing protein 6	XRCC6	892110000	437360000	0	0	315090000	0	0	90447000	49219000	0
P62861	P62861	40S ribosomal protein S30	FAU	366990000	143780000	0	0	72655000	0	0	101850000	48702000	0
P49411	P49411	Elongation factor Tu, mitochondrial	TUFM	8971000000	2937900000	0	0	2653300000	0	0	3331400000	48318000	0
P15311	P15311	Ezrin	EZR	572220000	280740000	0	0	160970000	0	7518200	70521000	48182000	4289700
P30041	P30041	Peroxiredoxin-6	PRDX6	1647100000	556710000	0	0	666220000	0	0	376660000	47486000	0
P35637	P35637	RNA-binding protein FUS	FUS	205730000	142440000	0	0	0	0	0	17065000	46231000	0
Q9NZI8;O00425	Q9NZI8	Insulin-like growth factor 2 mRNA-binding protein 1	IGF2BP1	314500000	156060000	0	0	90355000	0	0	21922000	46167000	0
P32969	P32969	60S ribosomal protein L9	RPL9	342930000	234220000	0	0	0	0	0	62586000	46120000	0
P19105;O14950;P24844	P19105;O14950;P24844	Myosin regulatory light chain 12A;Myosin regulatory light chain 12B;Myosin regulatory light polypeptide 9	MYL12A;MYL12B;MYL9	195900000	81702000	0	0	68203000	0	0	0	46000000	0
Q9NRW1;P20340;Q14964	Q9NRW1;P20340;Q14964	Ras-related protein Rab-6B;Ras-related protein Rab-6A;Ras-related protein Rab-39A	RAB6B;RAB6A;RAB39A	249510000	80800000	0	0	122750000	0	0	0	45957000	0
Q15366;P57721;P57723	Q15366	Poly(rC)-binding protein 2	PCBP2	1029100000	494410000	0	0	346980000	0	5402900	136710000	45623000	0
P05455	P05455	Lupus La protein	SSB	482140000	203240000	0	0	160400000	0	0	73027000	45473000	0
P09429;B2RPK0;P23497	P09429;B2RPK0	High mobility group protein B1;Putative high mobility group protein B1-like 1	HMGB1;HMGB1P1	698810000	288480000	0	0	314010000	0	0	50916000	45409000	0
P49773	P49773	Histidine triad nucleotide-binding protein 1	HINT1	356350000	122550000	0	0	70322000	0	23858000	94868000	44752000	0
Q09028	Q09028	Histone-binding protein RBBP4	RBBP4	651490000	330290000	0	0	136030000	0	0	140480000	44701000	0
P32119	P32119	Peroxiredoxin-2	PRDX2	943870000	493580000	0	0	278640000	0	0	120600000	44173000	6870600
Q13835	Q13835	Plakophilin-1	PKP1	61052000	0	0	0	0	4652900	0	12534000	43865000	0
P40926	P40926	Malate dehydrogenase, mitochondrial	MDH2	9026600000	3819300000	0	0	2575000000	22334000	5878100	2560300000	43794000	0
P18754	P18754	Regulator of chromosome condensation	RCC1	145230000	30162000	0	0	71378000	0	0	0	43689000	0
P46782	P46782	40S ribosomal protein S5;40S ribosomal protein S5, N-terminally processed	RPS5	536820000	256000000	0	0	63608000	0	0	173520000	43680000	0
P0C0L4;P0C0L5;CON__P01030;CON__ENSEMBL:ENSBTAP00000007350	P0C0L4;P0C0L5	Complement C4-A;Complement C4 beta chain;Complement C4-A alpha chain;C4a anaphylatoxin;C4b-A;C4d-A;Complement C4 gamma chain;Complement C4-B;Complement C4 beta chain;Complement C4-B alpha chain;C4a anaphylatoxin;C4b-B;C4d-B;Complement C4 gamma chain	C4A;C4B	189540000	0	0	0	18384000	39462000	0	74136000	42928000	14628000
P62316	P62316	Small nuclear ribonucleoprotein Sm D2	SNRPD2	259730000	102650000	0	0	32618000	0	0	81768000	42696000	0
Q15517	Q15517	Corneodesmosin	CDSN	53995000	0	0	0	0	11753000	0	0	42242000	0
P62306	P62306	Small nuclear ribonucleoprotein F	SNRPF	508840000	203640000	0	0	136110000	0	0	126890000	42188000	0
P10599	P10599	Thioredoxin	TXN	1191800000	498040000	0	39841000	307370000	43921000	12084000	196060000	42112000	52417000
Q9HB71	Q9HB71	Calcyclin-binding protein	CACYBP	2109300000	915060000	0	0	563870000	0	0	588300000	42083000	0
Q13151	Q13151	Heterogeneous nuclear ribonucleoprotein A0	HNRNPA0	202430000	28460000	0	0	101580000	0	0	30364000	42034000	0
[truncated: 988 more rows]

## Sheet: Table9. drug screen
Supplementary Table 13. Drug screen data
[truncated: 154 more rows]
